# Supplementary material for: Gene Expression in the Rodent Brain is Associated with Its Regional Connectivity
Source: PLoS Comput Biol. 2011 May 5;7(5):e1002040. doi: 10.1371/journal.pcbi.1002040 (PMC3088660; doi:10.1371/journal.pcbi.1002040)
Supplement: Table S2 — Prediction results are compared to the BAMS ground truth. For each potential connection (existing or not) that participates in the prediction experiment we report the BAMS data and the prediction result, which is obtained when the potential connection is part of the test data. (XLS) [file pcbi.1002040.s004.xls]

## Sheet: Afferent
To\From	Main olfactory bulb	Accessory olfactory bulb	Anterior olfactory nucleus	Taenia tecta	Piriform area	Nucleus of the lateral olfactory tract	Piriform-amygdalar area	Cortical amygdalar area	Postpiriform transition area	Ammon's Horn	Dentate gyrus	Subiculum	Nucleus accumbens	Fundus of striatum	Olfactory tubercle	Lateral septal nucleus	Septofimbrial nucleus	Central amygdalar nucleus	Anterior amygdalar area	Medial amygdalar nucleus	Pallidum_ dorsal region	Magnocellular nucleus	Substantia innominata	Bed nucleus of the anterior commissure	Bed nuclei of the stria terminalis	Anterodorsal nucleus	Anteromedial nucleus	Anteroventral nucleus of thalamus	Interanterodorsal nucleus of the thalamus	Interanteromedial nucleus of the thalamus	Lateral dorsal nucleus of thalamus	Reticular nucleus of the thalamus	Lateral posterior nucleus of the thalamus	Suprageniculate nucleus	Intergeniculate leaflet of the lateral geniculate complex	Ventral part of the lateral geniculate complex	Central lateral nucleus of the thalamus	Central medial nucleus of the thalamus	Parafascicular nucleus	Lateral habenula	Medial habenula	Intermediodorsal nucleus of the thalamus	Mediodorsal nucleus of thalamus	Perireunensis nucleus	Dorsal part of the lateral geniculate complex	Medial geniculate complex	Peripeduncular nucleus	Ventral medial nucleus of the thalamus	Ventral posterior complex of the thalamus
Dentate gyrus	not	not	not	not	miss	not	new	not	new	new	miss	miss	not	not	not	not	not	not	not	not	not	not	not	not	not	not	not	not	not	not	not	not	not	not	not	not	not	not	not	not	not	not	not	not	not	not	not	not	not
Subiculum	not	not	not	not	new	new	miss	new	miss	new	miss	miss	not	new	not	not	not	new	miss	not	not	not	not	not	not	not	not	miss	not	not	not	not	not	not	not	not	not	not	miss	not	not	not	not	not	not	not	not	not	not
Nucleus accumbens	not	not	not	not	not	not	not	not	not	not	not	not	not	not	not	not	not	not	not	not	not	not	not	not	miss	not	not	not	not	not	not	not	not	not	not	not	miss	not	not	not	not	not	not	not	not	not	not	not	not
Olfactory tubercle	not	not	not	not	miss	not	not	not	not	not	not	not	not	not	not	not	not	not	not	not	not	miss	not	not	not	not	not	not	not	not	not	not	not	not	not	not	not	not	not	not	not	not	not	not	not	not	not	not	not
Lateral septal nucleus	not	not	not	not	miss	not	not	not	new	not	not	not	not	not	not	not	not	not	not	not	not	not	not	not	not	not	not	not	not	not	not	not	not	not	not	not	miss	not	not	not	not	not	not	not	not	not	not	not	not
Septofimbrial nucleus	not	not	not	not	not	not	not	not	not	new	not	miss	not	not	not	not	not	not	not	not	not	not	not	not	not	not	not	not	not	not	not	not	not	not	not	not	not	not	not	not	not	not	not	not	not	not	not	not	not
Medial amygdalar nucleus	not	not	not	not	not	new	not	not	not	not	not	not	not	not	not	not	not	new	miss	new	not	miss	new	not	miss	not	not	not	not	not	not	not	not	not	not	not	not	not	not	not	not	not	not	new	not	not	not	not	not
Magnocellular nucleus	miss	new	not	not	miss	not	not	not	not	not	not	not	not	not	new	not	not	not	not	not	not	hit	miss	not	not	not	not	not	not	not	not	not	not	not	not	not	not	not	not	not	not	not	not	not	not	not	not	not	not
Substantia innominata	miss	new	not	not	miss	not	not	not	not	not	not	not	miss	not	new	new	not	miss	not	not	not	not	not	new	hit	not	not	not	not	not	not	not	not	not	not	not	not	not	not	not	not	not	not	not	not	not	not	not	not
Bed nuclei of the stria terminalis	not	not	not	not	not	not	not	not	not	not	not	not	not	new	not	not	not	miss	not	not	not	not	miss	not	new	not	not	not	not	not	not	not	not	not	not	not	not	not	not	not	not	not	not	not	not	not	not	not	not
Reticular nucleus of the thalamus	not	not	not	not	not	not	not	not	not	not	not	not	not	not	not	not	not	not	not	not	not	new	miss	not	not	miss	not	not	new	not	miss	new	new	new	hit	new	new	not	hit	not	not	not	miss	not	hit	hit	not	not	hit
Ventral part of the lateral geniculate complex	not	not	not	not	not	not	not	not	not	not	new	not	not	not	not	not	not	not	not	not	not	not	not	not	not	not	not	not	not	not	hit	miss	hit	new	hit	hit	new	not	not	not	not	not	not	not	hit	miss	new	not	new
Central lateral nucleus of the thalamus	not	not	not	not	not	not	not	not	not	not	not	not	not	not	not	not	not	not	not	not	not	new	miss	not	new	not	not	not	not	not	not	not	not	not	not	not	not	not	not	not	not	not	not	not	not	not	not	not	not
Central medial nucleus of the thalamus	not	not	not	not	not	not	not	not	not	not	not	not	not	new	not	not	not	not	not	not	not	new	miss	not	not	not	not	not	not	not	not	not	not	not	not	not	not	not	not	not	not	not	not	not	not	not	not	not	not
Lateral habenula	not	not	not	not	not	not	not	not	not	not	not	not	new	not	not	not	not	not	new	not	not	hit	hit	not	hit	not	not	not	not	not	not	not	not	not	not	not	miss	not	not	not	not	not	not	not	not	not	not	not	not
Mediodorsal nucleus of thalamus	not	not	not	not	not	not	not	not	not	not	not	not	not	not	not	not	not	not	new	not	not	hit	miss	not	not	not	not	not	not	not	not	not	not	not	not	not	not	not	not	not	not	not	not	not	not	not	not	not	not
Dorsal part of the lateral geniculate complex	not	not	not	not	not	not	not	not	not	not	not	not	not	not	not	not	not	not	not	not	not	not	not	not	not	not	not	not	not	not	not	miss	miss	new	hit	hit	not	not	not	not	not	not	not	not	new	miss	new	not	not
Arcuate hypothalamic nucleus	not	not	not	not	not	not	not	not	not	not	not	not	not	not	not	not	not	not	not	not	not	new	miss	not	hit	miss	not	not	not	not	not	not	not	not	not	not	not	not	not	not	not	not	not	not	not	not	not	not	not
Paraventricular hypothalamic nucleus	not	not	not	not	not	not	not	not	not	not	not	not	new	not	not	miss	new	not	not	not	not	new	miss	not	miss	not	not	not	not	not	not	not	not	not	not	not	not	not	not	miss	not	not	not	new	not	not	not	not	not
Anterodorsal preoptic nucleus	not	not	not	not	not	not	not	not	not	not	not	not	not	not	not	not	not	not	not	not	not	not	not	not	not	not	not	not	not	not	not	not	not	not	not	not	not	not	not	not	not	not	not	not	not	not	not	not	not
Anteroventral preoptic nucleus	not	not	not	not	not	not	not	not	not	not	not	not	not	not	not	not	not	not	not	not	not	not	not	not	not	not	not	not	not	not	not	not	not	not	not	not	not	not	not	not	not	not	not	not	not	not	not	not	not
Dorsomedial nucleus of the hypothalamus	not	not	not	not	not	not	not	not	not	not	not	not	new	not	not	not	not	not	not	not	not	new	miss	not	hit	not	not	not	not	not	not	not	not	not	not	not	miss	not	not	miss	new	not	not	not	not	not	not	not	not
Median preoptic nucleus	not	not	not	not	not	not	not	not	not	not	not	not	not	not	not	not	not	not	not	not	not	not	not	not	not	not	not	not	not	not	not	not	not	not	not	not	not	not	not	not	not	not	not	not	not	not	not	not	not
Parastrial nucleus	not	not	not	not	not	not	not	not	not	not	not	not	not	not	not	not	not	not	not	not	not	not	not	not	not	not	not	not	not	not	not	not	not	not	not	not	not	not	not	not	not	not	not	not	not	not	not	not	not
Suprachiasmatic nucleus	not	not	not	not	not	not	not	not	not	not	not	not	not	not	not	miss	new	not	not	not	not	not	not	not	not	not	not	not	not	not	not	not	not	not	hit	hit	not	not	not	miss	new	not	not	new	miss	new	not	not	not
Anterior hypothalamic nucleus	not	not	not	not	new	not	miss	not	not	not	not	not	new	not	not	not	not	not	not	not	not	not	miss	new	miss	not	not	not	not	not	not	not	not	not	not	not	not	not	not	not	not	not	not	not	not	not	not	not	not
Lateral mammillary nucleus	not	not	not	not	not	not	not	not	not	not	not	miss	not	not	not	not	not	not	not	not	not	not	not	new	hit	miss	miss	hit	new	not	not	not	not	not	not	not	not	not	not	not	not	not	not	not	not	not	not	not	not
Medial mammillary nucleus	not	not	not	not	not	not	not	not	new	not	not	miss	not	not	not	not	not	not	not	not	not	not	not	new	hit	miss	miss	hit	new	not	not	not	not	not	not	not	not	not	not	not	not	not	not	not	not	not	not	new	not
Supramammillary nucleus	not	not	not	not	not	new	not	not	not	not	not	miss	miss	new	new	not	not	new	miss	not	not	new	miss	not	not	miss	not	not	not	not	not	not	not	not	not	not	not	not	not	not	not	not	not	not	not	not	not	not	not
Medial preoptic nucleus	not	not	not	not	not	not	not	not	not	not	not	not	miss	new	new	new	not	not	not	not	not	new	miss	not	hit	not	not	not	not	not	not	not	not	not	not	not	not	not	not	not	not	not	not	not	not	not	not	not	not
Posterior hypothalamic nucleus	not	not	not	not	not	new	not	not	not	not	not	not	miss	new	new	new	miss	new	miss	not	not	hit	hit	new	hit	not	not	not	not	not	not	miss	not	not	miss	new	not	not	not	not	not	not	not	not	not	not	not	not	not
Dorsal premammillary nucleus	not	not	not	not	not	not	not	not	not	not	not	not	not	not	not	not	not	not	not	not	not	not	not	not	miss	not	not	not	not	not	not	not	not	not	not	not	not	not	not	not	not	not	not	not	not	not	miss	not	not
Ventral premammillary nucleus	not	not	not	not	not	not	not	not	not	not	not	not	new	not	not	not	not	not	not	not	not	new	miss	not	miss	not	not	not	not	not	not	not	not	not	not	not	not	not	not	not	not	not	not	not	not	not	not	not	not
Ventromedial hypothalamic nucleus	not	not	not	not	not	not	not	not	not	not	not	not	new	not	not	not	not	not	not	not	not	new	miss	not	miss	not	not	not	not	not	not	not	not	not	not	not	not	not	not	not	not	not	not	not	not	not	not	not	not
Tuberal nucleus	not	not	not	not	not	not	not	not	miss	not	not	not	not	not	not	not	not	not	not	not	not	not	not	not	not	not	not	not	not	not	not	not	not	not	not	not	not	not	not	not	not	not	not	not	not	not	not	not	not
Parabigeminal nucleus	not	not	not	not	not	not	not	not	not	not	not	not	not	not	not	not	not	not	not	not	not	not	not	not	not	not	not	not	not	not	new	miss	hit	not	new	miss	not	not	not	not	not	not	not	not	miss	not	not	not	new
Substantia nigra_ reticular part	not	not	not	not	not	not	not	not	not	not	not	not	hit	new	hit	not	not	not	not	not	not	new	miss	not	not	not	not	not	not	not	not	not	not	not	not	not	not	not	not	not	not	not	not	not	not	not	not	not	not
Ventral tegmental area	not	not	not	not	not	not	not	not	not	not	new	not	hit	not	hit	miss	not	miss	not	not	not	hit	hit	not	hit	not	not	not	not	not	not	not	not	not	not	not	not	not	not	miss	new	not	not	not	not	not	not	not	not
Midbrain reticular nucleus_ retrorubral area	not	not	not	not	not	not	not	not	not	not	not	not	miss	not	new	not	not	not	not	not	not	new	miss	not	new	not	not	not	not	not	not	not	new	not	new	miss	not	not	not	not	not	not	not	not	not	not	not	not	not
Anterior pretectal nucleus	not	not	not	not	not	not	not	not	not	not	not	not	not	not	not	not	not	not	not	not	not	not	not	not	not	not	not	not	not	not	miss	miss	new	not	hit	hit	miss	not	not	not	not	not	not	not	hit	new	not	not	new
Nucleus of the optic tract	not	not	not	not	not	not	not	not	not	not	not	not	not	not	not	not	not	not	not	not	not	not	not	not	not	not	not	not	not	not	hit	not	hit	not	new	miss	not	not	not	not	not	not	not	not	hit	not	not	not	new
Nucleus of the posterior commissure	not	not	not	not	not	not	not	not	not	not	not	not	not	not	not	not	not	not	not	not	not	not	not	not	not	not	not	not	not	not	miss	new	new	not	new	miss	not	not	not	not	not	not	not	not	miss	not	not	not	not
Olivary pretectal nucleus	not	not	not	not	not	not	not	not	not	not	not	not	not	not	not	not	not	not	not	not	not	not	not	not	not	not	not	not	not	not	miss	not	new	not	new	miss	not	not	not	not	not	not	not	not	miss	not	not	not	new
Cuneiform nucleus	not	not	not	not	not	not	not	not	not	not	not	not	not	not	not	not	not	not	not	not	not	not	not	not	not	not	not	not	not	not	not	not	not	not	not	not	not	not	not	not	not	not	not	not	not	not	not	not	not
Red Nucleus	not	not	not	not	not	not	not	not	not	not	not	not	not	not	not	not	not	not	not	not	not	not	not	not	not	not	not	not	not	not	not	new	not	not	not	not	not	not	not	not	not	not	not	not	not	not	not	not	miss
Substantia nigra_ compact part	not	not	not	not	not	not	not	not	not	not	not	not	hit	new	new	miss	new	not	not	not	not	new	miss	not	new	not	not	not	not	not	not	not	not	not	not	not	not	not	not	not	not	not	not	not	not	not	not	not	not
Pedunculopontine nucleus	not	not	not	not	not	not	not	not	not	not	not	not	new	miss	not	not	not	not	new	not	not	miss	hit	not	miss	not	not	not	not	not	not	not	not	not	not	not	not	not	not	not	not	not	not	not	not	not	not	not	not
Central linear nucleus raphי	not	not	not	not	not	not	not	not	not	not	not	not	miss	not	not	miss	new	miss	not	not	not	not	not	not	new	not	not	not	not	not	not	not	not	not	not	not	not	not	not	miss	not	not	not	not	not	not	not	not	not
Dorsal nucleus raphי	not	not	not	not	not	not	not	not	not	not	not	not	not	not	not	not	not	not	not	not	not	new	miss	new	hit	not	not	not	not	not	not	miss	not	not	new	miss	miss	not	not	not	not	not	not	not	miss	not	not	not	not
Parabrachial nucleus	not	not	not	not	not	not	not	not	not	not	not	not	not	not	not	not	not	not	not	not	not	new	miss	not	not	not	not	not	not	not	not	not	not	not	not	not	miss	not	not	not	not	not	not	not	not	not	not	not	not
Barrington's nucleus	not	not	not	not	not	not	not	not	not	not	not	not	not	not	not	not	not	not	not	not	not	not	not	not	not	not	not	not	not	not	not	not	not	not	not	not	not	not	not	not	not	not	not	not	not	not	not	not	not
Dorsal tegmental nucleus	not	not	not	not	not	not	not	not	not	not	not	not	not	not	not	not	not	not	not	not	not	not	not	not	not	not	not	not	not	not	not	miss	not	not	new	miss	miss	not	not	not	not	not	not	not	miss	not	not	not	not
Pontine central gray	not	not	not	not	not	not	not	not	not	not	not	not	not	not	not	not	not	not	not	not	not	not	not	new	hit	not	not	not	not	not	not	not	not	not	not	not	not	not	not	not	not	not	not	not	not	not	not	not	not
Tegmental reticular nucleus	not	not	not	not	not	not	not	not	not	not	not	not	not	not	not	not	not	not	not	not	not	not	not	not	not	not	not	not	not	not	not	not	not	not	not	not	not	not	not	not	not	not	not	not	not	not	not	not	not
Superior central nucleus raphי	not	not	not	not	not	not	not	not	not	not	not	not	not	not	not	not	not	not	not	not	not	not	not	new	miss	not	not	not	not	not	not	not	not	not	not	not	not	not	not	not	not	not	not	not	not	not	not	not	not
Locus ceruleus	not	not	not	not	not	not	not	not	not	not	not	not	new	not	not	not	not	not	not	not	new	hit	hit	new	hit	not	not	not	not	not	new	hit	new	not	new	miss	miss	not	not	not	not	not	not	not	miss	not	not	not	miss
Nucleus of the solitary tract	not	not	not	not	not	not	not	not	not	not	not	not	not	not	not	not	not	not	not	not	not	new	miss	not	not	not	not	not	not	not	not	not	not	not	not	not	not	not	not	not	not	not	not	not	not	not	not	not	not
[truncated: 97 more columns]

## Sheet: Efferent
From\To	Main olfactory bulb	Accessory olfactory bulb	Anterior olfactory nucleus	Taenia tecta	Piriform area	Nucleus of the lateral olfactory tract	Piriform-amygdalar area	Cortical amygdalar area	Postpiriform transition area	Ammon's Horn	Dentate gyrus	Subiculum	Nucleus accumbens	Fundus of striatum	Olfactory tubercle	Lateral septal nucleus	Septofimbrial nucleus	Central amygdalar nucleus	Anterior amygdalar area	Medial amygdalar nucleus	Pallidum_ dorsal region	Magnocellular nucleus	Substantia innominata	Bed nucleus of the anterior commissure	Bed nuclei of the stria terminalis	Anterodorsal nucleus	Anteromedial nucleus	Anteroventral nucleus of thalamus	Interanterodorsal nucleus of the thalamus	Interanteromedial nucleus of the thalamus	Lateral dorsal nucleus of thalamus	Reticular nucleus of the thalamus	Lateral posterior nucleus of the thalamus	Suprageniculate nucleus	Intergeniculate leaflet of the lateral geniculate complex	Ventral part of the lateral geniculate complex	Central lateral nucleus of the thalamus	Central medial nucleus of the thalamus	Parafascicular nucleus	Lateral habenula	Medial habenula	Intermediodorsal nucleus of the thalamus	Mediodorsal nucleus of thalamus	Perireunensis nucleus	Dorsal part of the lateral geniculate complex	Medial geniculate complex	Peripeduncular nucleus	Ventral medial nucleus of the thalamus	Ventral posterior complex of the thalamus
Piriform area	not	not	not	not	not	not	not	not	not	new	miss	not	new	miss	miss	miss	new	not	new	not	not	hit	hit	not	not	not	not	not	not	not	not	not	not	not	not	not	not	not	not	not	not	not	not	not	not	not	not	not	not
Subiculum	not	not	not	not	not	not	not	not	not	new	miss	miss	not	not	not	new	miss	not	not	not	not	not	not	not	not	new	miss	miss	new	not	not	not	not	not	not	not	not	not	not	not	not	not	not	not	not	not	not	not	not
Nucleus accumbens	not	not	not	not	not	not	not	not	not	not	not	not	not	not	not	not	not	not	not	not	not	new	miss	not	not	not	not	not	not	not	not	not	not	not	not	not	not	not	not	not	not	not	not	not	not	not	not	not	not
Lateral septal nucleus	not	not	not	not	not	not	not	not	not	not	not	not	not	not	not	not	not	not	not	not	not	not	not	not	not	not	not	not	not	not	not	not	not	not	not	not	not	not	not	not	not	not	not	not	not	not	not	not	not
Magnocellular nucleus	miss	new	miss	hit	not	new	new	miss	not	not	not	not	new	not	miss	not	not	not	not	miss	not	miss	new	not	not	not	not	not	new	not	not	not	not	not	not	not	new	not	new	miss	new	not	miss	not	not	not	not	not	not
Substantia innominata	miss	new	not	not	miss	hit	not	new	not	not	not	not	not	new	not	not	not	hit	hit	new	not	miss	new	not	hit	not	not	not	new	new	not	miss	not	not	not	not	hit	miss	new	hit	new	new	miss	new	not	not	miss	new	not
Bed nuclei of the stria terminalis	not	not	not	not	not	not	not	not	not	not	not	not	hit	new	new	not	not	miss	not	miss	not	new	miss	not	new	not	not	not	not	not	not	not	not	not	not	not	not	not	not	miss	miss	not	not	new	not	not	not	not	not
Anterodorsal nucleus	not	not	not	not	not	not	not	not	not	not	not	not	not	not	not	not	not	not	not	not	not	not	not	not	not	not	not	not	not	not	not	miss	not	not	not	not	not	not	not	not	not	not	not	not	not	not	not	not	not
Lateral dorsal nucleus of thalamus	not	not	not	not	not	not	not	not	not	not	not	not	not	not	not	not	not	not	not	not	not	not	not	not	not	not	not	not	not	not	not	miss	not	not	new	miss	not	not	not	not	not	not	not	not	not	not	not	not	not
Reticular nucleus of the thalamus	not	not	not	not	not	not	not	not	not	not	not	not	not	not	not	not	not	not	not	not	not	not	not	not	not	not	not	not	not	not	not	not	not	not	new	miss	not	not	not	not	not	not	not	not	miss	not	not	not	not
Lateral posterior nucleus of the thalamus	not	not	not	not	not	not	not	not	not	not	not	not	not	not	not	not	not	not	not	not	not	not	not	not	not	not	not	not	not	not	new	new	new	not	new	miss	not	not	not	not	not	not	not	not	miss	not	not	not	miss
Intergeniculate leaflet of the lateral geniculate complex	not	not	not	not	not	not	not	not	not	new	not	not	not	not	not	not	not	not	not	not	not	not	not	not	not	not	not	not	not	not	miss	miss	new	not	hit	hit	not	not	not	not	not	not	not	not	hit	not	not	not	new
Ventral part of the lateral geniculate complex	not	not	not	not	not	not	not	not	not	not	not	not	not	not	not	not	not	not	not	not	not	not	not	not	not	not	not	not	not	not	miss	not	new	not	hit	hit	not	not	not	not	not	not	not	not	hit	miss	new	not	not
Central lateral nucleus of the thalamus	not	not	not	not	not	not	not	not	not	not	not	not	miss	not	not	miss	new	not	not	not	not	not	not	not	new	not	not	not	not	not	not	not	not	not	not	not	not	not	not	miss	new	not	not	not	not	not	not	not	not
Lateral habenula	not	not	not	not	not	not	not	not	not	not	not	not	not	not	not	not	not	not	not	not	not	not	not	not	not	not	not	not	not	not	not	not	not	not	not	not	not	not	not	not	not	not	not	not	not	not	not	not	not
Dorsal part of the lateral geniculate complex	not	not	not	not	not	not	not	not	not	not	not	not	not	not	not	not	not	not	not	not	not	not	not	not	not	not	not	not	not	not	not	miss	not	new	new	miss	not	not	not	not	not	not	not	not	not	miss	new	not	not
Ventral posterior complex of the thalamus	not	not	not	not	not	not	not	not	not	not	not	not	not	not	not	not	not	not	not	not	not	not	not	not	not	not	not	not	not	not	not	miss	not	not	not	not	not	not	not	not	not	not	not	not	not	not	not	not	not
Paraventricular hypothalamic nucleus	not	not	not	not	not	not	not	not	not	not	not	not	not	not	not	not	not	not	not	miss	not	not	not	not	not	not	not	not	not	not	not	not	not	not	not	not	not	not	not	not	not	not	not	not	not	not	not	not	not
Anterodorsal preoptic nucleus	not	not	not	not	not	not	not	not	not	not	not	not	not	not	not	hit	hit	not	not	miss	not	not	not	new	miss	not	not	not	not	not	not	not	not	not	not	not	not	not	not	miss	new	not	not	new	not	not	not	not	not
Anteroventral preoptic nucleus	not	not	not	not	not	not	not	not	not	not	not	not	new	not	not	not	not	not	not	miss	not	new	miss	new	hit	not	not	not	not	not	not	not	not	not	not	not	miss	not	not	miss	not	not	not	new	not	not	not	not	not
Anteroventral periventricular nucleus	not	not	not	not	not	not	not	not	not	not	not	not	new	not	not	miss	new	not	not	miss	not	new	miss	new	hit	not	not	not	not	not	not	not	not	not	not	not	not	not	not	miss	new	not	not	new	not	not	not	not	not
Dorsomedial nucleus of the hypothalamus	not	not	not	not	not	not	not	not	not	not	not	not	miss	new	new	new	not	not	not	not	not	not	miss	not	new	not	not	not	not	not	not	not	not	not	not	not	not	not	not	miss	new	not	not	not	not	not	not	not	not
Median preoptic nucleus	not	not	not	not	not	not	not	not	not	not	not	not	not	not	not	not	not	not	not	not	not	new	miss	not	new	not	not	not	not	not	not	not	not	not	not	not	not	not	not	not	not	not	not	not	not	not	not	not	not
Parastrial nucleus	not	not	not	not	not	not	not	not	not	not	not	not	new	not	not	hit	hit	not	not	miss	not	new	miss	new	hit	not	not	not	not	not	not	not	not	not	not	not	miss	not	not	miss	new	not	not	new	not	not	not	not	not
Suprachiasmatic nucleus	not	not	not	not	not	not	not	not	not	not	not	not	not	not	not	miss	new	new	not	not	not	not	not	new	hit	not	not	not	not	not	not	not	not	not	hit	hit	not	not	not	not	not	not	not	new	not	not	not	not	not
Medial mammillary nucleus	not	not	new	miss	not	not	not	not	not	not	not	miss	not	not	not	not	not	not	not	not	not	not	not	not	not	hit	not	miss	not	not	not	not	not	not	not	not	not	not	not	not	not	not	not	not	not	not	not	not	not
Supramammillary nucleus	not	not	new	miss	not	not	not	not	not	new	miss	not	not	not	not	new	miss	not	not	not	not	not	not	not	not	hit	not	miss	not	not	not	not	not	not	not	not	not	not	not	not	not	not	not	not	not	not	not	not	not
Medial preoptic nucleus	not	not	not	not	not	not	not	not	not	not	not	miss	hit	new	new	hit	new	new	not	miss	not	hit	hit	new	hit	not	not	not	new	not	not	not	not	not	not	not	not	not	hit	miss	not	new	miss	new	not	not	miss	not	not
Dorsal premammillary nucleus	not	not	not	not	not	not	not	not	not	not	not	not	not	not	not	not	not	not	not	not	not	not	not	not	not	not	not	not	not	not	not	not	miss	not	not	not	miss	not	not	not	not	not	not	not	not	not	not	not	not
Ventral premammillary nucleus	not	not	not	not	not	not	not	not	miss	not	not	not	not	not	not	not	not	not	not	not	not	not	not	not	not	not	not	not	not	not	not	not	not	not	not	not	not	not	not	not	not	not	not	new	not	not	not	not	not
Tuberal nucleus	not	not	not	not	miss	not	not	not	hit	not	not	not	not	not	new	not	not	not	not	not	not	new	miss	not	not	not	not	not	not	not	not	not	not	not	not	not	miss	not	not	not	not	miss	not	not	not	not	not	not	not
Substantia nigra_ reticular part	not	not	not	not	not	not	not	not	not	not	not	not	hit	not	hit	not	not	not	not	not	not	not	not	not	not	not	not	not	not	not	not	not	not	not	not	not	not	not	not	not	not	not	not	not	not	not	not	not	not
Ventral tegmental area	not	not	not	not	not	not	not	not	not	not	not	not	hit	hit	hit	hit	miss	hit	new	miss	not	new	hit	new	hit	not	not	not	new	new	not	not	not	not	not	not	new	miss	new	miss	new	new	miss	new	not	not	not	miss	not
Anterior pretectal nucleus	not	not	not	not	not	not	not	not	not	not	new	not	not	not	not	not	not	not	not	not	not	not	not	not	not	not	not	not	not	not	miss	not	miss	not	new	miss	new	not	new	not	not	not	not	not	new	not	miss	not	not
Nucleus of the optic tract	not	not	not	not	not	not	not	not	not	not	new	not	not	not	not	not	not	not	not	not	not	not	not	not	not	not	not	not	not	not	not	not	miss	new	new	miss	not	not	not	not	not	not	not	not	not	miss	new	not	not
Substantia nigra_ compact part	not	not	not	not	not	not	not	not	not	not	not	not	hit	new	hit	miss	new	not	not	not	not	new	miss	not	new	not	not	not	new	not	not	not	not	not	not	not	new	not	not	not	not	not	miss	not	not	not	not	miss	not
Pedunculopontine nucleus	not	not	not	not	not	not	not	not	not	not	not	not	not	not	not	not	not	not	not	not	not	not	not	not	not	not	not	not	not	not	not	miss	not	not	new	miss	not	not	not	not	not	not	not	not	not	not	not	not	not
Dorsal nucleus raphי	not	not	not	not	not	not	not	not	not	not	not	not	miss	not	miss	not	not	not	not	not	not	not	not	not	not	not	not	not	not	not	not	not	not	not	not	not	not	not	not	not	not	not	not	hit	not	not	not	not	not
Dorsal tegmental nucleus	not	not	not	new	not	not	not	not	not	new	miss	miss	not	not	not	miss	new	new	not	miss	not	not	not	not	not	new	not	miss	new	new	hit	new	hit	not	new	miss	hit	miss	hit	hit	new	new	hit	new	miss	new	hit	not	new
Pontine gray	not	not	not	not	not	not	not	not	not	not	not	not	not	not	not	not	not	not	not	not	not	not	not	not	not	not	not	not	not	not	not	not	new	not	not	not	not	not	not	not	not	not	not	not	not	not	not	not	not
Tegmental reticular nucleus	not	not	not	not	not	not	not	not	not	not	not	not	not	not	not	not	not	not	not	not	not	not	not	not	not	not	not	not	not	not	not	not	not	not	new	miss	not	not	not	not	not	not	not	not	not	not	not	not	not
Superior central nucleus raphי	not	not	not	not	not	not	not	not	not	not	not	not	not	not	not	not	not	not	not	not	not	miss	not	not	not	not	not	not	not	not	not	not	not	not	not	not	not	not	not	not	not	not	not	new	not	not	not	not	not
Locus ceruleus	not	not	not	not	not	not	not	not	not	not	not	not	not	not	not	not	not	not	not	not	not	not	not	not	not	not	not	not	not	new	not	not	not	not	not	not	not	miss	not	not	not	new	not	not	not	not	not	not	not
Inferior olivary complex	not	not	not	not	not	not	not	not	not	not	not	not	not	not	not	not	not	not	not	not	not	not	not	not	not	not	not	not	not	not	not	not	not	not	not	not	not	not	not	not	not	not	not	not	not	not	not	not	not
[truncated: 97 more columns]

## Sheet: Summary
label	Category	Afferent	empirical p-value (*)	Efferent	empirical p-value (*)
hit	Hits (predicted connections in testing set)	207	<0.0001	230	<0.0001
new	New predictions	390	<0.0001	416	<0.0001
(additional analysis of new)	out of which appear in liberal BAMS connectivity matrix (**)	61	<0.0001	71	<0.0001
miss	Misses (nonpredicted connections in testing set)	351	<0.0001	356	<0.0001
not	Others (nonpredicted & nonexisting)	7317	<0.0001	5378	<0.0001
	(*) The obtained results are better than any of the results obtained in over 100,000 random permutaion runs. The empirical p-valu is therefore less than 10^(-5)
	(**) The liberal BAMS connectivity matrix is obtained by propogating connectiviy from structural leaves that do not appear in ABA to the their existing super-structure

## Sheet: correlation of gene expression
region	Main olfactory bulb	Accessory olfactory bulb	Anterior olfactory nucleus	Taenia tecta	Piriform area	Nucleus of the lateral olfactory tract	Piriform-amygdalar area	Cortical amygdalar area	Postpiriform transition area	Ammon's Horn	Dentate gyrus	Subiculum	Nucleus accumbens	Fundus of striatum	Olfactory tubercle	Lateral septal nucleus	Septofimbrial nucleus	Central amygdalar nucleus	Anterior amygdalar area	Medial amygdalar nucleus	Pallidum_ dorsal region	Magnocellular nucleus	Substantia innominata	Bed nucleus of the anterior commissure	Bed nuclei of the stria terminalis	Anterodorsal nucleus	Anteromedial nucleus	Anteroventral nucleus of thalamus	Interanterodorsal nucleus of the thalamus	Interanteromedial nucleus of the thalamus	Lateral dorsal nucleus of thalamus	Reticular nucleus of the thalamus	Lateral posterior nucleus of the thalamus	Suprageniculate nucleus	Intergeniculate leaflet of the lateral geniculate complex	Ventral part of the lateral geniculate complex	Central lateral nucleus of the thalamus	Central medial nucleus of the thalamus	Parafascicular nucleus	Lateral habenula	Medial habenula	Intermediodorsal nucleus of the thalamus	Mediodorsal nucleus of thalamus	Perireunensis nucleus	Dorsal part of the lateral geniculate complex	Medial geniculate complex	Peripeduncular nucleus	Ventral medial nucleus of the thalamus	Ventral posterior complex of the thalamus
Main olfactory bulb	1	0.701	0.17	0.149	0.116	-0.019	0.019	-0.009	0.046	0.036	0.061	0.004	0.121	-0.002	0.157	0.063	0.062	-0.055	-0.069	-0.013	-0.035	-0.091	-0.032	0.034	-0.025	0.036	-0.047	0.015	-0.078	-0.108	-0.01	-0.058	0.025	-0.05	-0.072	-0.067	-0.046	-0.1	-0.117	0.009	0.035	-0.101	-0.079	-0.115	-0.037	-0.012	-0.068	-0.11	-0.086
Accessory olfactory bulb	0.701	1	0.234	0.076	0.147	-0.029	0.028	-0.009	0.08	0.093	0.113	0.063	0.151	0.01	0.119	0.044	0.024	-0.001	-0.049	-0.008	-0.028	-0.042	-0.004	0.006	0.01	0.048	-0.046	0.018	-0.063	-0.103	0.083	-0.043	0.078	-0.046	-0.047	-0.054	-0.008	-0.106	-0.077	0.017	-0.004	-0.093	-0.068	-0.095	0.011	-0.01	-0.046	-0.079	-0.047
Anterior olfactory nucleus	0.17	0.234	1	0.358	0.041	-0.024	-0.037	-0.055	0.017	-0.02	-0.054	-0.04	0.078	0.008	0.038	0.092	0.086	-0.044	-0.069	-0.009	0.008	-0.123	0.021	0.035	0.015	0.029	-0.013	0.069	-0.054	-0.048	-0.075	-0.037	-0.005	-0.005	-0.083	-0.046	-0.02	-0.011	-0.095	-0.054	-0.038	-0.016	-0.061	-0.071	-0.096	-0.018	-0.048	-0.042	-0.084
Taenia tecta	0.149	0.076	0.358	1	0.115	0.035	0.085	0.081	0.022	0.12	0.112	0.098	0.122	-0.001	0.106	0.256	0.065	0.041	-0.009	0.013	-0.076	-0.064	-0.032	0.029	0.052	-0.011	0.019	-0.05	0.056	0.074	-0.009	-0.102	0.007	-0.067	-0.033	-0.049	-0.017	0.048	0.001	0.042	0.044	0.021	0.04	0.087	-0.009	-0.03	-0.034	-0.002	-0.071
Piriform area	0.116	0.147	0.041	0.115	1	0.254	0.575	0.438	0.572	0.458	0.285	0.532	0.21	0.223	0.285	0.01	-0.079	0.289	0.26	0.167	0.039	0.148	0.142	-0.057	-0.006	-0.054	-0.005	-0.093	-0.004	-0.055	0.179	-0.009	0.096	-0.012	0.114	0.066	0.016	-0.102	0.007	-0.038	-0.098	-0.091	0.001	-0.038	0.182	0.072	0.061	-0.025	0.053
Nucleus of the lateral olfactory tract	-0.019	-0.029	-0.024	0.035	0.254	1	0.276	0.473	0.028	0.15	0.175	0.191	0.17	0.402	0.404	0.005	-0.09	0.344	0.714	0.607	0.066	0.289	0.312	-0.041	0.078	-0.128	-0.04	-0.151	-0.016	0.017	0.057	0.048	0.029	0.032	0.102	0.075	-0.035	-0.038	-0.001	-0.053	-0.075	-0.034	-0.03	0.038	0.165	0.098	0.135	-0.004	0.063
Piriform-amygdalar area	0.019	0.028	-0.037	0.085	0.575	0.276	1	0.729	0.279	0.332	0.25	0.466	0.127	0.127	0.266	-0.002	-0.095	0.326	0.218	0.248	-0.017	0.13	0.068	-0.07	0.01	-0.12	-0.056	-0.146	-0.04	-0.015	0.063	-0.079	0.011	-0.048	0.088	0.062	-0.046	-0.058	-0.033	-0.076	-0.079	-0.054	-0.045	-0.017	0.098	0.047	0.057	-0.043	-0.011
Cortical amygdalar area	-0.009	-0.009	-0.055	0.081	0.438	0.473	0.729	1	0.146	0.302	0.308	0.449	0.17	0.248	0.356	0.015	-0.112	0.487	0.402	0.495	-0.008	0.186	0.127	-0.069	0.073	-0.165	-0.066	-0.192	-0.032	0.015	0.038	-0.071	0.011	-0.032	0.133	0.1	-0.049	-0.04	-0.021	-0.069	-0.085	-0.045	-0.048	0.025	0.136	0.094	0.125	-0.038	-0.009
Postpiriform transition area	0.046	0.08	0.017	0.022	0.572	0.028	0.279	0.146	1	0.372	0.148	0.438	0.062	0.033	0.031	0.018	0.006	0.048	-0.009	0.009	0.032	-0.063	-0.02	0.005	-0.029	0.006	-0.025	-0.018	-0.048	-0.115	0.081	-0.021	0.051	-0.021	0.017	0.001	-0.008	-0.112	-0.032	-0.02	-0.056	-0.09	-0.034	-0.082	0.06	0.015	-0.004	-0.047	-0.016
Ammon's Horn	0.036	0.093	-0.02	0.12	0.458	0.15	0.332	0.302	0.372	1	0.641	0.678	0.137	0.088	0.108	0.059	-0.024	0.222	0.119	0.1	0.013	0.076	0	-0.079	-0.024	0.042	-0.06	-0.089	-0.025	-0.06	0.41	0.001	0.259	-0.031	0.286	0.22	0.062	-0.116	0.038	0.074	-0.024	-0.092	-0.011	-0.053	0.415	0.148	0.145	-0.047	0.071
Dentate gyrus	0.061	0.113	-0.054	0.112	0.285	0.175	0.25	0.308	0.148	0.641	1	0.441	0.242	0.126	0.183	0.104	-0.032	0.275	0.167	0.189	-0.049	0.096	0.034	-0.04	0.103	0.041	-0.008	-0.099	0.054	0.025	0.373	-0.01	0.404	0.028	0.202	0.121	0.14	-0.049	0.115	0.245	0.061	-0.033	0.056	0.056	0.343	0.268	0.193	0.018	0.081
Subiculum	0.004	0.063	-0.04	0.098	0.532	0.191	0.466	0.449	0.438	0.678	0.441	1	0.153	0.142	0.132	0.037	-0.081	0.333	0.207	0.159	0.022	0.128	0.052	-0.078	0.014	-0.056	-0.038	-0.131	-0.003	-0.03	0.226	0.014	0.12	-0.024	0.177	0.128	0.028	-0.096	0.057	0.005	-0.082	-0.083	0.002	-0.005	0.239	0.095	0.116	-0.019	0.073
Nucleus accumbens	0.121	0.151	0.078	0.122	0.21	0.17	0.127	0.17	0.062	0.137	0.242	0.153	1	0.422	0.647	0.39	0.124	0.343	0.235	0.223	0.06	0.163	0.5	0.114	0.378	-0.037	0.107	0.029	0.09	0.046	0.095	0.021	0.145	0.058	0.007	-0.02	0.089	0.004	0.071	0.061	-0.047	-0.009	0.051	0.089	0.054	0.083	0.052	0.09	0.035
Fundus of striatum	-0.002	0.01	0.008	-0.001	0.223	0.402	0.127	0.248	0.033	0.088	0.126	0.142	0.422	1	0.404	0.144	0.031	0.489	0.675	0.389	0.303	0.247	0.569	0.042	0.166	-0.103	0.001	-0.06	-0.01	0.001	0.023	0.148	0.057	0.095	0.118	0.117	-0.013	-0.033	0.002	-0.037	-0.081	-0.032	-0.029	0.018	0.143	0.141	0.14	0.01	0.067
Olfactory tubercle	0.157	0.119	0.038	0.106	0.285	0.404	0.266	0.356	0.031	0.108	0.183	0.132	0.647	0.404	1	0.146	-0.018	0.252	0.372	0.335	0.037	0.288	0.481	-0.012	0.135	-0.098	-0.014	-0.084	-0.028	-0.033	0.053	-0.014	0.058	0.006	0.01	-0.026	-0.017	-0.07	-0.05	-0.063	-0.071	-0.08	-0.039	-0.029	0.069	0.054	0.035	-0.029	0.02
Lateral septal nucleus	0.063	0.044	0.092	0.256	0.01	0.005	-0.002	0.015	0.018	0.059	0.104	0.037	0.39	0.144	0.146	1	0.584	0.208	0.032	0.095	-0.027	-0.129	0.112	0.293	0.418	0.038	0.177	0.082	0.201	0.157	-0.072	-0.05	0.033	0.018	-0.036	-0.033	0.06	0.136	0.106	0.173	0.072	0.092	0.132	0.221	-0.052	0.027	0.006	0.129	-0.099
Septofimbrial nucleus	0.062	0.024	0.086	0.065	-0.079	-0.09	-0.095	-0.112	0.006	-0.024	-0.032	-0.081	0.124	0.031	-0.018	0.584	1	0.015	-0.101	-0.023	0.034	-0.218	-0.005	0.285	0.207	0.197	0.127	0.228	0.117	0.049	-0.12	-0.021	-0.011	0.006	-0.071	-0.029	0.01	0.077	0.02	0.152	0.162	0.053	0.068	0.055	-0.112	-0.004	-0.033	0.039	-0.125
Central amygdalar nucleus	-0.055	-0.001	-0.044	0.041	0.289	0.344	0.326	0.487	0.048	0.222	0.275	0.333	0.343	0.489	0.252	0.208	0.015	1	0.529	0.47	0.191	0.171	0.313	0.062	0.32	-0.11	0.036	-0.09	0.068	0.088	0.048	0.052	0.063	0.057	0.193	0.193	0.02	0.027	0.092	0.033	-0.057	0.021	0.028	0.161	0.161	0.151	0.189	0.079	0.024
Anterior amygdalar area	-0.069	-0.049	-0.069	-0.009	0.26	0.714	0.218	0.402	-0.009	0.119	0.167	0.207	0.235	0.675	0.372	0.032	-0.101	0.529	1	0.56	0.201	0.477	0.531	-0.026	0.156	-0.147	-0.013	-0.15	0.02	0.047	0.083	0.15	0.037	0.076	0.152	0.129	-0.008	-0.034	0.058	-0.041	-0.106	-0.031	-0.005	0.092	0.203	0.12	0.182	0.038	0.122
Medial amygdalar nucleus	-0.013	-0.008	-0.009	0.013	0.167	0.607	0.248	0.495	0.009	0.1	0.189	0.159	0.223	0.389	0.335	0.095	-0.023	0.47	0.56	1	0.085	0.241	0.328	0.051	0.233	-0.134	-0.058	-0.123	-0.039	0.01	-0.022	0.024	0.03	0.089	0.092	0.096	-0.067	-0.022	-0.022	-0.042	-0.055	-0.03	-0.074	0.07	0.114	0.162	0.204	-0.011	0.007
Pallidum_ dorsal region	-0.035	-0.028	0.008	-0.076	0.039	0.066	-0.017	-0.008	0.032	0.013	-0.049	0.022	0.06	0.303	0.037	-0.027	0.034	0.191	0.201	0.085	1	0.071	0.292	0.025	-0.049	-0.004	-0.042	0.032	-0.094	-0.119	-0.002	0.298	0.007	0.06	0.121	0.168	-0.04	-0.105	-0.086	-0.081	-0.073	-0.087	-0.082	-0.136	0.082	0.074	0.071	-0.05	0.082
Magnocellular nucleus	-0.091	-0.042	-0.123	-0.064	0.148	0.289	0.13	0.186	-0.063	0.076	0.096	0.128	0.163	0.247	0.288	-0.129	-0.218	0.171	0.477	0.241	0.071	1	0.589	-0.128	0.063	-0.087	-0.058	-0.152	-0.025	-0.008	0.204	0.134	0.019	-0.019	0.066	0.023	-0.003	-0.106	0.059	-0.062	-0.108	-0.083	-0.034	0.045	0.133	-0.05	0.056	0.017	0.192
Substantia innominata	-0.032	-0.004	0.021	-0.032	0.142	0.312	0.068	0.127	-0.02	0	0.034	0.052	0.5	0.569	0.481	0.112	-0.005	0.313	0.531	0.328	0.292	0.589	1	0.064	0.267	-0.104	0.011	-0.016	-0.029	-0.035	0.08	0.213	0.061	0.096	0.037	0.044	-0.001	-0.079	-0.007	-0.074	-0.129	-0.077	-0.06	0.015	0.057	0.051	0.081	0.041	0.129
Bed nucleus of the anterior commissure	0.034	0.006	0.035	0.029	-0.057	-0.041	-0.07	-0.069	0.005	-0.079	-0.04	-0.078	0.114	0.042	-0.012	0.293	0.285	0.062	-0.026	0.051	0.025	-0.128	0.064	1	0.444	0.059	0.175	0.072	0.125	0.037	-0.115	-0.014	-0.018	0.013	-0.057	-0.034	0.023	0.051	0.067	0.099	0.021	0.013	0.064	0.166	-0.103	-0.009	-0.015	0.135	-0.094
Bed nuclei of the stria terminalis	-0.025	0.01	0.015	0.052	-0.006	0.078	0.01	0.073	-0.029	-0.024	0.103	0.014	0.378	0.166	0.135	0.418	0.207	0.32	0.156	0.233	-0.049	0.063	0.267	0.444	1	0.041	0.229	0.069	0.168	0.103	-0.042	-0.039	0.025	-0.004	-0.044	-0.04	0.117	0.06	0.17	0.146	-0.014	0.039	0.081	0.299	-0.067	-0.013	0.044	0.262	-0.078
Anterodorsal nucleus	0.036	0.048	0.029	-0.011	-0.054	-0.128	-0.12	-0.165	0.006	0.042	0.041	-0.056	-0.037	-0.103	-0.098	0.038	0.197	-0.11	-0.147	-0.134	-0.004	-0.087	-0.104	0.059	0.041	1	0.182	0.46	0.174	-0.025	0.177	0.056	0.085	-0.023	0.006	0.016	0.246	-0.032	0.118	0.173	0.146	-0.022	0.141	-0.039	0.047	-0.003	-0.031	0.1	0.044
Anteromedial nucleus	-0.047	-0.046	-0.013	0.019	-0.005	-0.04	-0.056	-0.066	-0.025	-0.06	-0.008	-0.038	0.107	0.001	-0.014	0.177	0.127	0.036	-0.013	-0.058	-0.042	-0.058	0.011	0.175	0.229	0.182	1	0.375	0.727	0.407	0.16	0.145	0.205	0.159	0.042	-0.009	0.41	0.333	0.339	0.179	-0.013	0.242	0.547	0.306	0.101	0.135	0.003	0.484	0.192
Anteroventral nucleus of thalamus	0.015	0.018	0.069	-0.05	-0.093	-0.151	-0.146	-0.192	-0.018	-0.089	-0.099	-0.131	0.029	-0.06	-0.084	0.082	0.228	-0.09	-0.15	-0.123	0.032	-0.152	-0.016	0.072	0.069	0.46	0.375	1	0.245	0.038	0.159	0.16	0.159	0.116	-0.013	0.02	0.276	0.077	0.058	0.07	0.122	0.063	0.189	-0.043	-0.011	0.076	-0.049	0.133	0.092
Interanterodorsal nucleus of the thalamus	-0.078	-0.063	-0.054	0.056	-0.004	-0.016	-0.04	-0.032	-0.048	-0.025	0.054	-0.003	0.09	-0.01	-0.028	0.201	0.117	0.068	0.02	-0.039	-0.094	-0.025	-0.029	0.125	0.168	0.174	0.727	0.245	1	0.573	0.181	0.073	0.201	0.131	0.058	-0.012	0.412	0.476	0.418	0.305	0.06	0.354	0.724	0.409	0.139	0.12	0.013	0.398	0.207
Interanteromedial nucleus of the thalamus	-0.108	-0.103	-0.048	0.074	-0.055	0.017	-0.015	0.015	-0.115	-0.06	0.025	-0.03	0.046	0.001	-0.033	0.157	0.049	0.088	0.047	0.01	-0.119	-0.008	-0.035	0.037	0.103	-0.025	0.407	0.038	0.573	1	0.074	-0.011	0.099	0.08	0.028	-0.029	0.206	0.693	0.29	0.22	0.108	0.519	0.475	0.437	0.067	0.069	0.012	0.25	0.11
Lateral dorsal nucleus of thalamus	-0.01	0.083	-0.075	-0.009	0.179	0.057	0.063	0.038	0.081	0.41	0.373	0.226	0.095	0.023	0.053	-0.072	-0.12	0.048	0.083	-0.022	-0.002	0.204	0.08	-0.115	-0.042	0.177	0.16	0.159	0.181	0.074	1	0.239	0.567	0.111	0.278	0.172	0.389	0.007	0.197	0.123	-0.051	0.009	0.232	0.02	0.51	0.184	0.079	0.139	0.431
Reticular nucleus of the thalamus	-0.058	-0.043	-0.037	-0.102	-0.009	0.048	-0.079	-0.071	-0.021	0.001	-0.01	0.014	0.021	0.148	-0.014	-0.05	-0.021	0.052	0.15	0.024	0.298	0.134	0.213	-0.014	-0.039	0.056	0.145	0.16	0.073	-0.011	0.239	1	0.162	0.163	0.191	0.227	0.125	-0.028	0.045	-0.027	-0.076	-0.029	0.098	-0.052	0.236	0.147	0.084	0.093	0.474
Lateral posterior nucleus of the thalamus	0.025	0.078	-0.005	0.007	0.096	0.029	0.011	0.011	0.051	0.259	0.404	0.12	0.145	0.057	0.058	0.033	-0.011	0.063	0.037	0.03	0.007	0.019	0.061	-0.018	0.025	0.085	0.205	0.159	0.201	0.099	0.567	0.162	1	0.341	0.203	0.124	0.41	0.093	0.177	0.19	-0.022	0.085	0.247	0.021	0.447	0.343	0.102	0.155	0.306
Suprageniculate nucleus	-0.05	-0.046	-0.005	-0.067	-0.012	0.032	-0.048	-0.032	-0.021	-0.031	0.028	-0.024	0.058	0.095	0.006	0.018	0.006	0.057	0.076	0.089	0.06	-0.019	0.096	0.013	-0.004	-0.023	0.159	0.116	0.131	0.08	0.111	0.163	0.341	1	0.122	0.106	0.155	0.109	0.075	0.02	-0.049	0.1	0.157	-0.001	0.208	0.582	0.168	0.075	0.229
Intergeniculate leaflet of the lateral geniculate complex	-0.072	-0.047	-0.083	-0.033	0.114	0.102	0.088	0.133	0.017	0.286	0.202	0.177	0.007	0.118	0.01	-0.036	-0.071	0.193	0.152	0.092	0.121	0.066	0.037	-0.057	-0.044	0.006	0.042	-0.013	0.058	0.028	0.278	0.191	0.203	0.122	1	0.752	0.115	0.003	0.069	0.027	-0.042	0.013	0.086	-0.015	0.596	0.428	0.281	0.033	0.205
Ventral part of the lateral geniculate complex	-0.067	-0.054	-0.046	-0.049	0.066	0.075	0.062	0.1	0.001	0.22	0.121	0.128	-0.02	0.117	-0.026	-0.033	-0.029	0.193	0.129	0.096	0.168	0.023	0.044	-0.034	-0.04	0.016	-0.009	0.02	-0.012	-0.029	0.172	0.227	0.124	0.106	0.752	1	0.038	-0.04	0.004	-0.009	-0.03	-0.023	0.003	-0.057	0.408	0.361	0.347	-0.011	0.122
Central lateral nucleus of the thalamus	-0.046	-0.008	-0.02	-0.017	0.016	-0.035	-0.046	-0.049	-0.008	0.062	0.14	0.028	0.089	-0.013	-0.017	0.06	0.01	0.02	-0.008	-0.067	-0.04	-0.003	-0.001	0.023	0.117	0.246	0.41	0.276	0.412	0.206	0.389	0.125	0.41	0.155	0.115	0.038	1	0.192	0.387	0.325	-0.015	0.169	0.545	0.131	0.215	0.175	0.024	0.328	0.281
Central medial nucleus of the thalamus	-0.1	-0.106	-0.011	0.048	-0.102	-0.038	-0.058	-0.04	-0.112	-0.116	-0.049	-0.096	0.004	-0.033	-0.07	0.136	0.077	0.027	-0.034	-0.022	-0.105	-0.106	-0.079	0.051	0.06	-0.032	0.333	0.077	0.476	0.693	0.007	-0.028	0.093	0.109	0.003	-0.04	0.192	1	0.305	0.193	0.129	0.715	0.519	0.377	0.016	0.088	-0.003	0.276	0.081
Parafascicular nucleus	-0.117	-0.077	-0.095	0.001	0.007	-0.001	-0.033	-0.021	-0.032	0.038	0.115	0.057	0.071	0.002	-0.05	0.106	0.02	0.092	0.058	-0.022	-0.086	0.059	-0.007	0.067	0.17	0.118	0.339	0.058	0.418	0.29	0.197	0.045	0.177	0.075	0.069	0.004	0.387	0.305	1	0.319	0.021	0.322	0.539	0.327	0.148	0.069	0.041	0.374	0.185
Lateral habenula	0.009	0.017	-0.054	0.042	-0.038	-0.053	-0.076	-0.069	-0.02	0.074	0.245	0.005	0.061	-0.037	-0.063	0.173	0.152	0.033	-0.041	-0.042	-0.081	-0.062	-0.074	0.099	0.146	0.173	0.179	0.07	0.305	0.22	0.123	-0.027	0.19	0.02	0.027	-0.009	0.325	0.193	0.319	1	0.505	0.191	0.371	0.226	0.08	0.068	0.018	0.157	0.022
Medial habenula	0.035	-0.004	-0.038	0.044	-0.098	-0.075	-0.079	-0.085	-0.056	-0.024	0.061	-0.082	-0.047	-0.081	-0.071	0.072	0.162	-0.057	-0.106	-0.055	-0.073	-0.108	-0.129	0.021	-0.014	0.146	-0.013	0.122	0.06	0.108	-0.051	-0.076	-0.022	-0.049	-0.042	-0.03	-0.015	0.129	0.021	0.505	1	0.159	0.077	0.047	-0.049	-0.023	-0.032	-0.045	-0.089
Intermediodorsal nucleus of the thalamus	-0.101	-0.093	-0.016	0.021	-0.091	-0.034	-0.054	-0.045	-0.09	-0.092	-0.033	-0.083	-0.009	-0.032	-0.08	0.092	0.053	0.021	-0.031	-0.03	-0.087	-0.083	-0.077	0.013	0.039	-0.022	0.242	0.063	0.354	0.519	0.009	-0.029	0.085	0.1	0.013	-0.023	0.169	0.715	0.322	0.191	0.159	1	0.463	0.248	0.016	0.078	0.002	0.169	0.067
Mediodorsal nucleus of thalamus	-0.079	-0.068	-0.061	0.04	0.001	-0.03	-0.045	-0.048	-0.034	-0.011	0.056	0.002	0.051	-0.029	-0.039	0.132	0.068	0.028	-0.005	-0.074	-0.082	-0.034	-0.06	0.064	0.081	0.141	0.547	0.189	0.724	0.475	0.232	0.098	0.247	0.157	0.086	0.003	0.545	0.519	0.539	0.371	0.077	0.463	1	0.363	0.187	0.159	0.015	0.402	0.285
Perireunensis nucleus	-0.115	-0.095	-0.071	0.087	-0.038	0.038	-0.017	0.025	-0.082	-0.053	0.056	-0.005	0.089	0.018	-0.029	0.221	0.055	0.161	0.092	0.07	-0.136	0.045	0.015	0.166	0.299	-0.039	0.306	-0.043	0.409	0.437	0.02	-0.052	0.021	-0.001	-0.015	-0.057	0.131	0.377	0.327	0.226	0.047	0.248	0.363	1	0.024	-0.002	0.02	0.449	0.037
Dorsal part of the lateral geniculate complex	-0.037	0.011	-0.096	-0.009	0.182	0.165	0.098	0.136	0.06	0.415	0.343	0.239	0.054	0.143	0.069	-0.052	-0.112	0.161	0.203	0.114	0.082	0.133	0.057	-0.103	-0.067	0.047	0.101	-0.011	0.139	0.067	0.51	0.236	0.447	0.208	0.596	0.408	0.215	0.016	0.148	0.08	-0.049	0.016	0.187	0.024	1	0.432	0.235	0.077	0.353
Medial geniculate complex	-0.012	-0.01	-0.018	-0.03	0.072	0.098	0.047	0.094	0.015	0.148	0.268	0.095	0.083	0.141	0.054	0.027	-0.004	0.151	0.12	0.162	0.074	-0.05	0.051	-0.009	-0.013	-0.003	0.135	0.076	0.12	0.069	0.184	0.147	0.343	0.582	0.428	0.361	0.175	0.088	0.069	0.068	-0.023	0.078	0.159	-0.002	0.432	1	0.446	0.06	0.226
Peripeduncular nucleus	-0.068	-0.046	-0.048	-0.034	0.061	0.135	0.057	0.125	-0.004	0.145	0.193	0.116	0.052	0.14	0.035	0.006	-0.033	0.189	0.182	0.204	0.071	0.056	0.081	-0.015	0.044	-0.031	0.003	-0.049	0.013	0.012	0.079	0.084	0.102	0.168	0.281	0.347	0.024	-0.003	0.041	0.018	-0.032	0.002	0.015	0.02	0.235	0.446	1	0.014	0.08
Ventral medial nucleus of the thalamus	-0.11	-0.079	-0.042	-0.002	-0.025	-0.004	-0.043	-0.038	-0.047	-0.047	0.018	-0.019	0.09	0.01	-0.029	0.129	0.039	0.079	0.038	-0.011	-0.05	0.017	0.041	0.135	0.262	0.1	0.484	0.133	0.398	0.25	0.139	0.093	0.155	0.075	0.033	-0.011	0.328	0.276	0.374	0.157	-0.045	0.169	0.402	0.449	0.077	0.06	0.014	1	0.196
Ventral posterior complex of the thalamus	-0.086	-0.047	-0.084	-0.071	0.053	0.063	-0.011	-0.009	-0.016	0.071	0.081	0.073	0.035	0.067	0.02	-0.099	-0.125	0.024	0.122	0.007	0.082	0.192	0.129	-0.094	-0.078	0.044	0.192	0.092	0.207	0.11	0.431	0.474	0.306	0.229	0.205	0.122	0.281	0.081	0.185	0.022	-0.089	0.067	0.285	0.037	0.353	0.226	0.08	0.196	1
Arcuate hypothalamic nucleus	-0.009	-0.103	-0.029	0.035	-0.153	0.054	0.042	0.116	-0.165	-0.173	-0.102	-0.152	-0.078	-0.085	0.062	0.002	0.015	-0.043	-0.039	0.109	-0.123	-0.054	-0.084	0.002	0.021	-0.12	-0.109	-0.096	-0.079	0.078	-0.23	-0.179	-0.159	-0.09	-0.13	-0.118	-0.145	0.104	-0.131	-0.054	0.079	0.07	-0.097	0.054	-0.186	-0.096	-0.057	-0.102	-0.171
Paraventricular hypothalamic nucleus	-0.059	-0.082	0.021	0.047	-0.148	-0.042	-0.077	-0.047	-0.087	-0.143	-0.09	-0.141	0.018	-0.02	-0.072	0.194	0.13	0.052	-0.043	0.055	-0.077	-0.119	-0.014	0.178	0.249	-0.085	0.032	-0.031	0.088	0.236	-0.214	-0.145	-0.117	-0.049	-0.111	-0.093	-0.083	0.251	-0.002	0.079	0.099	0.176	0.033	0.388	-0.176	-0.073	-0.038	0.049	-0.169
Anterodorsal preoptic nucleus	-0.042	-0.069	0.03	0.039	-0.153	-0.038	-0.079	-0.053	-0.112	-0.153	-0.102	-0.145	0.013	0.004	-0.055	0.193	0.135	0.034	-0.03	0.041	-0.047	-0.106	0.013	0.129	0.18	-0.105	0.004	-0.017	0.047	0.241	-0.196	-0.106	-0.1	-0.014	-0.095	-0.071	-0.083	0.249	-0.034	0.037	0.081	0.183	0.003	0.181	-0.157	-0.052	-0.03	-0.002	-0.136
Anteroventral preoptic nucleus	-0.038	-0.099	-0.065	0.096	-0.073	0.113	0.055	0.132	-0.127	-0.147	-0.05	-0.086	0.04	-0.005	0.126	0.139	0.023	0.086	0.088	0.154	-0.128	0.054	0.045	0.137	0.262	-0.111	0.036	-0.115	0.078	0.136	-0.168	-0.137	-0.124	-0.07	-0.089	-0.101	-0.066	0.099	0.027	0.027	0.024	0.046	0.022	0.28	-0.109	-0.082	-0.024	0.068	-0.109
Anteroventral periventricular nucleus	-0.054	-0.104	-0.034	0.063	-0.109	0.063	0.023	0.091	-0.13	-0.152	-0.079	-0.115	-0.008	-0.026	0.047	0.098	0.031	0.044	0.027	0.121	-0.121	-0.019	-0.01	0.07	0.16	-0.132	-0.032	-0.112	0.019	0.179	-0.194	-0.162	-0.134	-0.067	-0.103	-0.106	-0.11	0.16	-0.045	-0.007	0.045	0.102	-0.025	0.213	-0.14	-0.08	-0.038	-0.022	-0.136
Dorsomedial nucleus of the hypothalamus	-0.087	-0.075	-0.065	0.052	-0.086	0.027	-0.01	0.044	-0.079	-0.104	0.013	-0.054	0.064	-0.011	-0.013	0.177	0.052	0.137	0.044	0.125	-0.151	-0.004	-0.003	0.164	0.333	-0.109	0.041	-0.125	0.12	0.214	-0.165	-0.175	-0.122	-0.086	-0.107	-0.117	-0.066	0.197	0.12	0.124	0.066	0.125	0.074	0.502	-0.125	-0.092	-0.012	0.141	-0.133
Median preoptic nucleus	-0.028	-0.1	0.02	0.063	-0.161	-0.002	-0.024	0.019	-0.131	-0.184	-0.145	-0.17	-0.048	-0.045	-0.004	0.121	0.105	-0.028	-0.049	0.054	-0.076	-0.107	-0.036	0.102	0.097	-0.122	-0.048	-0.056	-0.017	0.173	-0.25	-0.153	-0.148	-0.059	-0.123	-0.102	-0.135	0.193	-0.106	-0.034	0.076	0.126	-0.054	0.121	-0.193	-0.085	-0.065	-0.06	-0.175
Posterodorsal preoptic nucleus	0.11	0.037	0.224	0.012	-0.08	-0.215	-0.124	-0.213	0.167	-0.07	-0.264	-0.175	-0.142	-0.101	-0.147	0.018	0.199	-0.288	-0.335	-0.192	0.15	-0.42	-0.132	0.105	-0.205	0.026	-0.081	0.156	-0.203	-0.198	-0.236	-0.064	-0.079	0.02	-0.107	-0.034	-0.134	-0.05	-0.298	-0.159	0.013	-0.051	-0.176	-0.307	-0.214	-0.006	-0.119	-0.188	-0.203
Parastrial nucleus	-0.077	-0.061	-0.064	0.084	-0.019	0.093	0.013	0.075	-0.062	-0.043	0.074	0.009	0.169	0.083	0.06	0.273	0.08	0.232	0.163	0.168	-0.094	0.117	0.157	0.312	0.574	-0.038	0.157	-0.089	0.21	0.153	-0.049	-0.073	-0.045	-0.049	-0.031	-0.051	0.039	0.085	0.193	0.148	0.003	0.049	0.132	0.418	-0.025	-0.053	0.032	0.234	-0.046
Suprachiasmatic nucleus	-0.007	-0.073	0.017	0.021	-0.129	-0.001	-0.014	0.019	-0.099	-0.164	-0.132	-0.147	-0.03	-0.044	0.024	0.08	0.086	-0.039	-0.061	0.051	-0.058	-0.125	-0.056	0.066	0.044	-0.109	-0.036	-0.033	-0.031	0.099	-0.217	-0.128	-0.119	-0.028	-0.115	-0.099	-0.115	0.13	-0.12	-0.044	0.043	0.08	-0.064	0.073	-0.174	-0.051	-0.055	-0.071	-0.154
Anterior hypothalamic nucleus	-0.094	-0.107	-0.02	0.061	-0.097	0.054	-0.025	0.035	-0.1	-0.147	-0.031	-0.092	0.15	0.061	0.049	0.301	0.135	0.178	0.099	0.153	-0.106	-0.012	0.116	0.287	0.498	-0.091	0.162	-0.048	0.189	0.21	-0.18	-0.111	-0.089	-0.022	-0.09	-0.083	0	0.176	0.128	0.113	0.003	0.101	0.109	0.469	-0.135	-0.051	0.011	0.226	-0.121
Lateral mammillary nucleus	-0.019	-0.078	0.019	-0.06	-0.105	0.019	-0.006	0.025	-0.075	-0.173	-0.154	-0.157	-0.055	-0.07	0.067	-0.033	0.021	-0.096	-0.066	0.039	-0.046	-0.051	-0.035	0.038	0.024	-0.033	-0.037	-0.007	-0.085	-0.082	-0.179	-0.09	-0.113	-0.031	-0.113	-0.092	-0.052	-0.063	-0.086	-0.091	-0.034	-0.061	-0.103	-0.086	-0.168	-0.068	-0.061	-0.018	-0.126
Medial mammillary nucleus	-0.062	-0.134	-0.011	-0.004	-0.158	0.038	0	0.049	-0.17	-0.226	-0.157	-0.181	-0.059	-0.083	0.058	0.016	0.017	-0.072	-0.044	0.053	-0.122	-0.073	-0.074	0.029	0.011	-0.143	-0.032	-0.079	0.004	0.122	-0.24	-0.133	-0.153	-0.028	-0.121	-0.111	-0.103	0.16	-0.057	-0.039	0.021	0.114	-0.024	0.082	-0.18	-0.072	-0.063	-0.031	-0.139
Supramammillary nucleus	-0.127	-0.132	-0.089	0	-0.11	0.037	-0.024	0.02	-0.144	-0.147	-0.038	-0.081	0	-0.039	-0.015	0.048	-0.024	0.05	0.05	0.047	-0.138	0.058	-0.009	0.077	0.177	-0.089	0.061	-0.114	0.128	0.168	-0.123	-0.103	-0.118	-0.065	-0.084	-0.103	-0.013	0.148	0.166	0.079	-0.004	0.107	0.092	0.311	-0.093	-0.103	-0.021	0.165	-0.075
Medial preoptic nucleus	-0.066	-0.098	-0.046	0.078	-0.106	0.063	0.011	0.082	-0.127	-0.146	-0.043	-0.093	0.037	-0.004	0.038	0.167	0.047	0.096	0.059	0.137	-0.134	-0.003	0.014	0.114	0.258	-0.136	0.016	-0.116	0.087	0.224	-0.182	-0.158	-0.121	-0.064	-0.101	-0.106	-0.087	0.188	0.011	0.045	0.042	0.121	0.028	0.341	-0.131	-0.073	-0.021	0.038	-0.128
Posterior hypothalamic nucleus	-0.138	-0.137	-0.035	0.022	-0.185	-0.019	-0.079	-0.034	-0.17	-0.191	-0.094	-0.147	-0.028	-0.031	-0.106	0.128	0.038	0.078	0.005	0.063	-0.13	-0.053	-0.026	0.092	0.217	-0.142	0.007	-0.112	0.094	0.304	-0.223	-0.162	-0.158	-0.051	-0.109	-0.099	-0.09	0.362	0.089	0.082	0.078	0.296	0.055	0.412	-0.173	-0.098	-0.022	0.11	-0.151
Dorsal premammillary nucleus	-0.105	-0.104	-0.072	0.01	-0.096	0.037	-0.014	0.036	-0.107	-0.144	-0.033	-0.08	0.05	-0.017	0.003	0.12	0.027	0.094	0.05	0.087	-0.135	0.012	0.014	0.149	0.266	-0.11	0.076	-0.107	0.13	0.161	-0.162	-0.131	-0.114	-0.061	-0.095	-0.106	-0.025	0.137	0.142	0.087	0.002	0.086	0.085	0.384	-0.12	-0.085	-0.013	0.175	-0.11
Ventral premammillary nucleus	-0.09	-0.101	-0.108	0.036	-0.04	0.123	0.093	0.171	-0.106	-0.105	0.015	-0.025	0.059	-0.021	0.105	0.077	-0.043	0.128	0.106	0.178	-0.178	0.108	0.012	0.084	0.269	-0.124	0.02	-0.169	0.082	0.118	-0.134	-0.164	-0.131	-0.103	-0.094	-0.119	-0.049	0.071	0.107	0.047	-0.008	0.029	0.038	0.34	-0.094	-0.107	0.001	0.131	-0.098
Ventromedial hypothalamic nucleus	-0.079	-0.093	-0.077	0.069	-0.04	0.111	0.09	0.17	-0.1	-0.079	0.047	-0.019	0.086	-0.001	0.102	0.143	0.004	0.157	0.094	0.201	-0.174	0.048	0.009	0.102	0.297	-0.139	0.022	-0.159	0.093	0.177	-0.139	-0.179	-0.11	-0.087	-0.09	-0.112	-0.059	0.141	0.08	0.062	0.015	0.075	0.05	0.385	-0.1	-0.078	-0.003	0.112	-0.112
Subthalamic nucleus	-0.133	-0.087	-0.067	-0.102	-0.009	0.093	-0.002	0.023	-0.07	-0.022	0.024	0.019	0.067	0.102	0.047	-0.081	-0.123	0.102	0.185	0.126	0.072	0.345	0.294	-0.044	0.067	-0.074	-0.039	-0.052	-0.04	-0.038	0.137	0.178	0.064	0.09	0.029	0.028	0.008	-0.086	0.037	-0.057	-0.11	-0.058	-0.052	0.007	0.039	-0.005	0.058	0.044	0.21
Tuberal nucleus	-0.035	-0.104	0.003	-0.002	-0.077	0.135	0.089	0.177	-0.1	-0.162	-0.1	-0.126	0.03	-0.021	0.197	0.046	0.024	0.033	0.039	0.202	-0.106	0.033	0.052	0.099	0.21	-0.089	-0.016	-0.044	-0.044	-0.019	-0.188	-0.141	-0.113	-0.062	-0.123	-0.11	-0.067	-0.01	-0.065	-0.077	-0.034	-0.027	-0.081	0.056	-0.18	-0.082	-0.043	0.041	-0.148
Zona incerta	-0.168	-0.113	-0.08	-0.108	-0.044	0.053	-0.044	-0.029	-0.078	-0.035	0.009	-0.005	0.052	0.093	-0.02	-0.043	-0.09	0.11	0.166	0.079	0.083	0.237	0.235	-0.001	0.153	-0.035	0.048	0.002	0.015	-0.015	0.136	0.223	0.086	0.098	0.078	0.128	0.08	-0.062	0.1	-0.025	-0.113	-0.048	0.006	0.072	0.074	0.052	0.146	0.272	0.272
Inferior colliculus	0.088	0.094	0.031	-0.079	-0.051	-0.095	-0.136	-0.17	-0.004	-0.034	-0.025	-0.041	-0.004	-0.02	-0.065	-0.011	0.01	-0.065	-0.078	-0.075	0.044	-0.089	-0.02	-0.011	-0.05	0.045	-0.027	0.083	-0.047	-0.106	0.062	0.086	0.077	0.082	-0.016	0.012	0.016	-0.103	-0.025	0	-0.052	-0.078	-0.046	-0.114	-0.011	0.019	-0.003	-0.057	0.041
Midbrain trigeminal nucleus	-0.114	-0.035	-0.16	-0.087	-0.046	-0.058	-0.062	-0.064	-0.044	0.029	0.066	0.042	-0.041	-0.076	-0.121	-0.068	-0.126	0.018	0.01	-0.086	-0.122	0.153	-0.056	-0.053	0.096	0.063	-0.018	-0.112	0.019	-0.043	0.082	-0.058	-0.045	-0.122	-0.02	-0.059	0.051	-0.121	0.168	0.059	-0.064	-0.094	-0.002	0.081	0.029	-0.143	-0.024	0.081	-0.004
Nucleus of the brachium of the inferior colliculus	-0.024	-0.021	0.004	-0.055	-0.013	0.08	-0.023	0.021	-0.005	-0.028	0.04	-0.014	0.016	0.091	0.017	0.021	0.023	0.084	0.087	0.156	0.061	-0.035	0.062	0.021	0.017	-0.042	-0.006	0.009	-0.016	-0.014	-0.022	0.065	0.079	0.432	0.061	0.079	-0.01	0.006	-0.016	-0.007	-0.023	0.008	-0.013	-0.024	0.074	0.363	0.245	-0.032	0.025
Parabigeminal nucleus	0.064	0.016	0.081	-0.038	-0.069	0.025	-0.058	-0.039	-0.001	-0.087	-0.101	-0.094	-0.095	-0.009	-0.018	-0.038	0.043	-0.082	-0.043	0.067	0.047	-0.147	-0.051	0.002	-0.1	0.007	-0.093	0.048	-0.121	-0.107	-0.131	-0.011	-0.066	0.06	-0.046	0.015	-0.114	-0.055	-0.157	-0.081	-0.006	-0.056	-0.122	-0.13	-0.061	0.074	0.056	-0.119	-0.099
Nucleus sagulum	-0.047	-0.053	-0.018	-0.08	-0.058	0.046	-0.049	-0.029	-0.033	-0.083	-0.072	-0.06	-0.057	0.021	-0.019	-0.051	-0.02	-0.02	0.043	0.072	0.042	0.012	0.041	-0.016	-0.047	-0.059	-0.066	-0.025	-0.082	-0.066	-0.052	0.042	-0.024	0.135	-0.006	0.019	-0.084	-0.052	-0.08	-0.086	-0.04	-0.041	-0.088	-0.078	-0.025	0.059	0.062	-0.079	0.003
Substantia nigra_ reticular part	-0.053	-0.078	-0.004	-0.088	-0.054	0.08	0.017	0.03	-0.053	-0.071	-0.106	-0.061	-0.082	-0.005	0.049	-0.144	-0.082	-0.08	0.044	0.092	0.075	0.155	0.124	-0.061	-0.109	-0.091	-0.127	-0.055	-0.166	-0.155	-0.02	0.056	-0.036	0.048	-0.033	-0.017	-0.099	-0.146	-0.147	-0.174	-0.101	-0.12	-0.167	-0.166	-0.064	-0.006	0.036	-0.115	0.024
Ventral tegmental area	-0.123	-0.133	-0.072	-0.04	-0.143	-0.037	-0.078	-0.055	-0.112	-0.159	-0.103	-0.107	-0.068	-0.072	-0.077	-0.017	-0.023	-0.036	-0.018	-0.032	-0.084	0.048	-0.015	0.07	0.122	-0.017	0.039	-0.074	0.032	0.001	-0.116	-0.066	-0.129	-0.1	-0.109	-0.104	-0.001	-0.009	0.127	0.019	-0.051	-0.029	0.016	0.156	-0.135	-0.141	-0.041	0.185	-0.077
Midbrain reticular nucleus_ retrorubral area	-0.109	-0.079	-0.07	-0.113	-0.085	-0.032	-0.08	-0.087	-0.058	-0.084	-0.092	-0.066	-0.081	-0.027	-0.072	-0.135	-0.109	-0.058	0.01	-0.045	0.052	0.128	0.084	-0.06	-0.043	-0.025	-0.075	-0.031	-0.111	-0.128	0.03	0.068	-0.023	0.035	-0.045	-0.038	-0.028	-0.14	-0.041	-0.114	-0.105	-0.109	-0.117	-0.111	-0.055	-0.049	0.022	-0.025	0.05
Interstitial nucleus of Cajal	-0.14	-0.124	-0.098	-0.036	-0.114	-0.093	-0.103	-0.118	-0.087	-0.073	-0.044	-0.069	-0.103	-0.083	-0.138	-0.029	-0.05	-0.06	-0.046	-0.121	-0.028	0.029	-0.055	-0.036	-0.026	-0.04	0.002	-0.074	0.064	0.083	-0.027	0.021	-0.071	-0.04	-0.01	-0.02	-0.009	0.077	0.101	0.096	0.028	0.098	0.088	0.117	-0.028	-0.08	-0.029	0.036	0.01
Anterior pretectal nucleus	-0.081	-0.027	-0.014	-0.061	-0.042	-0.043	-0.085	-0.091	-0.04	0.018	0.127	0.015	0.085	0.024	-0.037	0.034	-0.006	0.03	0.019	-0.04	0.012	0.047	0.104	0.015	0.097	0.046	0.122	0.135	0.101	0.03	0.242	0.151	0.421	0.2	0.049	0.038	0.259	0.013	0.188	0.124	-0.057	0.017	0.107	0.014	0.088	0.094	0.035	0.141	0.167
Medial pretectal area	0.029	0.001	-0.002	0.003	-0.111	-0.104	-0.103	-0.123	-0.025	-0.084	-0.06	-0.126	-0.07	-0.082	-0.095	0.071	0.16	-0.09	-0.142	-0.066	-0.035	-0.175	-0.119	0.073	0.008	0.082	-0.031	0.081	-0.009	0.013	-0.13	-0.087	-0.063	-0.051	-0.088	-0.061	-0.054	0.061	-0.022	0.296	0.404	0.079	-0.007	0.015	-0.126	-0.061	-0.06	-0.041	-0.132
Nucleus of the optic tract	0.03	0.064	0.019	-0.047	-0.038	-0.051	-0.083	-0.097	0.006	0.07	0.207	0.029	0.058	0.013	-0.034	0.021	0.028	-0.012	-0.028	-0.005	0.042	-0.015	0.061	0.031	0.048	0.073	-0.007	0.113	-0.031	-0.076	0.186	0.111	0.323	0.146	0.04	0.053	0.105	-0.089	0.026	0.094	-0.016	-0.069	-0.035	-0.073	0.053	0.109	0.042	0.004	0.065
Nucleus of the posterior commissure	-0.139	-0.09	-0.088	-0.028	-0.073	-0.038	-0.079	-0.075	-0.071	-0.033	0.059	-0.019	0.031	-0.011	-0.089	0.114	0.041	0.074	0.037	-0.023	-0.059	0.055	0.021	0.083	0.213	0.082	0.148	-0.001	0.201	0.134	0.052	0.009	0.042	-0.004	0.005	-0.01	0.195	0.092	0.48	0.282	0.059	0.103	0.205	0.235	0.017	-0.034	0.019	0.245	0.04
Olivary pretectal nucleus	0.081	0.035	0.092	0.023	-0.111	-0.122	-0.125	-0.152	0.002	-0.054	-0.037	-0.118	-0.07	-0.094	-0.102	0.067	0.15	-0.13	-0.181	-0.082	-0.005	-0.232	-0.129	0.078	-0.011	0.147	-0.027	0.131	-0.041	-0.068	-0.116	-0.065	-0.02	-0.04	-0.106	-0.053	-0.017	-0.026	-0.051	0.209	0.205	-0.02	-0.041	-0.054	-0.133	-0.038	-0.068	-0.045	-0.139
Ventral tegmental nucleus	-0.112	-0.124	-0.012	-0.048	-0.192	-0.131	-0.127	-0.147	-0.125	-0.176	-0.171	-0.171	-0.144	-0.086	-0.171	-0.012	0.016	-0.115	-0.117	-0.126	-0.011	-0.098	-0.087	-0.015	-0.063	-0.095	-0.068	-0.059	-0.05	0.084	-0.193	-0.054	-0.151	-0.037	-0.081	-0.055	-0.102	0.146	-0.053	-0.025	0.037	0.17	-0.049	-0.005	-0.159	-0.092	-0.055	-0.066	-0.113
Anterior tegmental nucleus	-0.052	-0.073	0.016	-0.04	-0.142	-0.173	-0.153	-0.204	-0.011	-0.118	-0.173	-0.146	-0.134	-0.085	-0.178	0.013	0.092	-0.158	-0.176	-0.165	0.052	-0.173	-0.092	0.061	-0.073	-0.028	-0.03	0.009	-0.053	-0.053	-0.155	-0.017	-0.094	-0.028	-0.074	-0.039	-0.074	0.006	-0.043	-0.009	-0.004	0.015	-0.041	-0.056	-0.138	-0.07	-0.076	-0.037	-0.116
Cuneiform nucleus	-0.083	-0.014	-0.071	-0.103	-0.085	-0.085	-0.098	-0.113	-0.049	-0.043	-0.026	-0.022	-0.024	-0.026	-0.103	-0.067	-0.082	-0.005	-0.019	-0.067	0	0.072	0.043	-0.026	0.035	-0.031	-0.046	-0.022	-0.061	-0.085	0.074	0.051	0.032	-0.003	-0.021	-0.022	0.01	-0.117	0.013	-0.054	-0.101	-0.087	-0.08	-0.046	-0.028	-0.066	-0.013	-0.001	0.043
Red Nucleus	-0.119	-0.091	-0.109	-0.084	-0.075	-0.118	-0.105	-0.135	-0.027	-0.046	-0.082	-0.06	-0.138	-0.119	-0.143	-0.133	-0.097	-0.129	-0.084	-0.175	-0.012	0.06	-0.082	-0.045	-0.058	0.107	0	-0.042	-0.01	-0.098	0.021	0.011	-0.095	-0.119	-0.029	-0.035	0.03	-0.109	0.121	-0.009	-0.065	-0.106	0.013	-0.008	-0.016	-0.137	-0.055	0.105	0.011
Oculomotor nucleus	-0.099	-0.091	-0.088	-0.033	-0.101	-0.105	-0.086	-0.116	-0.072	-0.061	-0.069	-0.07	-0.146	-0.113	-0.147	-0.091	-0.075	-0.1	-0.092	-0.144	-0.037	-0.009	-0.123	-0.073	-0.101	-0.032	-0.076	-0.09	-0.009	0.069	-0.046	-0.038	-0.106	-0.084	-0.018	-0.028	-0.066	0.092	0	0.037	0.099	0.153	0.015	0.01	-0.035	-0.103	-0.058	-0.061	-0.041
Edinger-Westphal nucleus	-0.14	-0.118	-0.114	-0.035	-0.106	-0.055	-0.061	-0.065	-0.115	-0.064	-0.019	-0.053	-0.106	-0.087	-0.123	-0.065	-0.096	-0.027	-0.019	-0.09	-0.072	0.058	-0.081	-0.084	-0.03	-0.054	-0.045	-0.115	0.044	0.15	-0.022	-0.036	-0.092	-0.071	0.002	-0.013	-0.034	0.144	0.071	0.062	0.076	0.207	0.057	0.096	-0.014	-0.087	-0.019	-0.009	-0.005
Trochlear nucleus	-0.083	-0.074	-0.066	-0.036	-0.103	-0.155	-0.12	-0.171	-0.029	-0.052	-0.086	-0.072	-0.148	-0.113	-0.179	-0.056	-0.033	-0.124	-0.133	-0.188	0.007	-0.054	-0.121	-0.031	-0.096	-0.014	-0.035	-0.045	-0.009	-0.009	-0.047	-0.016	-0.087	-0.076	-0.042	-0.043	-0.051	0.003	0.011	0.032	0.025	0.038	0.009	-0.002	-0.056	-0.112	-0.075	-0.036	-0.047
Substantia nigra_ compact part	-0.128	-0.102	-0.093	-0.101	-0.052	0.05	-0.004	0.018	-0.092	-0.059	-0.039	-0.013	-0.045	-0.003	0	-0.149	-0.152	0	0.095	0.034	0.005	0.264	0.137	-0.082	0.016	-0.05	-0.064	-0.081	-0.08	-0.082	0.067	0.06	-0.025	-0.006	-0.031	-0.041	-0.012	-0.125	0.02	-0.096	-0.103	-0.098	-0.09	-0.029	-0.028	-0.072	0.046	0.022	0.074
Pedunculopontine nucleus	-0.134	-0.081	-0.044	-0.114	-0.115	-0.109	-0.115	-0.139	-0.066	-0.102	-0.108	-0.074	-0.063	-0.042	-0.13	-0.107	-0.084	-0.054	-0.035	-0.107	0.027	0.093	0.069	-0.031	0.01	-0.056	-0.064	-0.026	-0.108	-0.136	0.015	0.062	-0.025	-0.009	-0.058	-0.039	-0.019	-0.152	-0.024	-0.117	-0.132	-0.124	-0.123	-0.092	-0.091	-0.106	-0.04	0	0.023
Central linear nucleus raph	-0.066	-0.095	0.006	-0.018	-0.169	-0.08	-0.093	-0.088	-0.113	-0.177	-0.149	-0.165	-0.07	-0.056	-0.101	0.054	0.077	-0.051	-0.085	-0.034	-0.036	-0.12	-0.067	0.047	0.021	-0.096	-0.028	-0.046	-0.015	0.114	-0.212	-0.087	-0.136	-0.026	-0.095	-0.075	-0.098	0.176	-0.045	-0.009	0.052	0.167	-0.025	0.061	-0.168	-0.07	-0.043	-0.033	-0.134
Dorsal nucleus raph	-0.138	-0.13	-0.081	-0.03	-0.171	-0.088	-0.084	-0.092	-0.151	-0.121	-0.095	-0.119	-0.155	-0.114	-0.168	-0.065	-0.074	-0.073	-0.073	-0.111	-0.083	0	-0.119	-0.084	-0.059	-0.093	-0.112	-0.145	-0.035	0.14	-0.132	-0.105	-0.171	-0.112	-0.062	-0.063	-0.116	0.173	-0.012	0.014	0.109	0.23	-0.03	0.049	-0.115	-0.131	-0.055	-0.066	-0.095
Interpeduncular nucleus	0.048	-0.064	0.04	0.021	-0.168	-0.042	-0.06	-0.047	-0.091	-0.22	-0.207	-0.201	-0.142	-0.125	-0.019	-0.028	0.055	-0.174	-0.153	-0.019	-0.06	-0.193	-0.143	0.022	-0.105	-0.056	-0.101	-0.022	-0.11	-0.034	-0.266	-0.135	-0.17	-0.066	-0.152	-0.114	-0.147	0.037	-0.165	-0.075	0.054	0.023	-0.107	-0.059	-0.228	-0.09	-0.091	-0.123	-0.195
Nucleus of the lateral lemniscus	-0.004	-0.039	0.018	-0.131	-0.1	0.03	-0.078	-0.066	-0.048	-0.154	-0.175	-0.136	-0.138	-0.033	-0.019	-0.159	-0.046	-0.133	-0.025	0.065	0.087	0.004	0.027	-0.045	-0.167	-0.065	-0.155	-0.019	-0.209	-0.199	-0.085	0.066	-0.066	0.109	-0.054	-0.01	-0.158	-0.168	-0.205	-0.199	-0.092	-0.14	-0.21	-0.229	-0.089	0.013	0.006	-0.177	-0.01
Parabrachial nucleus	-0.095	0.012	-0.126	-0.133	-0.048	-0.047	-0.076	-0.079	-0.054	0.001	0.036	0.036	-0.019	-0.026	-0.104	-0.132	-0.165	0.034	0.033	-0.043	-0.05	0.187	0.045	-0.08	0.04	-0.04	-0.092	-0.102	-0.086	-0.108	0.13	0.025	0.023	-0.033	-0.03	-0.053	-0.012	-0.175	0.033	-0.055	-0.115	-0.132	-0.109	-0.029	0.011	-0.114	-0.017	-0.019	0.061
Principal sensory nucleus of the trigeminal	-0.071	-0.046	-0.052	-0.134	-0.043	-0.041	-0.071	-0.103	-0.025	-0.058	-0.136	-0.054	-0.153	-0.041	-0.078	-0.234	-0.15	-0.146	-0.014	-0.087	0.085	0.113	0.022	-0.132	-0.231	-0.071	-0.152	-0.066	-0.194	-0.202	0.022	0.099	-0.058	0.024	-0.019	-0.006	-0.12	-0.208	-0.166	-0.21	-0.148	-0.175	-0.176	-0.235	-0.003	-0.064	-0.032	-0.153	0.071
Superior olivary complex	-0.033	-0.097	0.01	-0.069	-0.129	-0.077	-0.064	-0.072	-0.068	-0.188	-0.236	-0.171	-0.163	-0.12	-0.039	-0.141	-0.035	-0.218	-0.131	-0.103	0.005	-0.063	-0.065	-0.036	-0.166	-0.071	-0.09	-0.016	-0.152	-0.156	-0.176	-0.019	-0.148	-0.049	-0.118	-0.094	-0.116	-0.115	-0.181	-0.205	-0.103	-0.11	-0.152	-0.208	-0.179	-0.106	-0.111	-0.11	-0.072
Barrington's nucleus	-0.105	-0.024	-0.172	-0.078	-0.012	-0.03	-0.031	-0.032	-0.027	0.06	0.08	0.07	-0.042	-0.077	-0.099	-0.097	-0.158	0.019	0.028	-0.068	-0.121	0.18	-0.056	-0.088	0.067	0.051	-0.043	-0.123	0.002	-0.032	0.109	-0.057	-0.044	-0.129	0	-0.045	0.036	-0.112	0.132	0.038	-0.048	-0.084	-0.013	0.075	0.053	-0.134	-0.01	0.047	0.009
Dorsal tegmental nucleus	-0.091	-0.091	-0.07	-0.051	-0.152	-0.087	-0.111	-0.111	-0.111	-0.125	-0.069	-0.105	-0.088	-0.086	-0.148	0.015	0.015	-0.042	-0.06	-0.077	-0.087	-0.028	-0.089	-0.03	0.014	-0.053	-0.057	-0.065	0.008	0.105	-0.13	-0.075	-0.118	-0.056	-0.068	-0.059	-0.069	0.118	0.033	0.086	0.113	0.161	-0.006	0.076	-0.11	-0.085	-0.031	-0.027	-0.092
Pontine central gray	-0.082	-0.063	-0.122	-0.087	-0.149	-0.163	-0.162	-0.191	-0.06	-0.089	-0.067	-0.09	-0.132	-0.146	-0.219	-0.021	0.008	-0.104	-0.124	-0.17	-0.105	-0.035	-0.156	-0.017	0.008	0.035	-0.053	-0.057	-0.009	-0.034	-0.084	-0.091	-0.129	-0.123	-0.09	-0.092	-0.05	-0.051	0.08	0.089	0.058	-0.02	-0.016	0.061	-0.093	-0.152	-0.067	0.01	-0.103
Pontine gray	-0.053	-0.126	-0.083	-0.031	-0.084	0.079	0.05	0.105	-0.151	-0.16	-0.111	-0.103	-0.144	-0.14	0.091	-0.18	-0.154	-0.131	-0.017	0.012	-0.137	0.09	-0.097	-0.115	-0.109	-0.08	-0.082	-0.131	-0.076	-0.063	-0.105	-0.079	-0.165	-0.118	-0.102	-0.114	-0.077	-0.092	-0.049	-0.13	-0.063	-0.094	-0.081	-0.042	-0.117	-0.145	-0.075	-0.037	-0.049
Supragenual nucleus	-0.059	-0.079	-0.059	-0.034	-0.136	-0.136	-0.13	-0.155	-0.055	-0.13	-0.118	-0.114	-0.123	-0.112	-0.157	-0.039	0.011	-0.111	-0.12	-0.128	-0.056	-0.075	-0.126	-0.011	-0.051	-0.019	-0.066	-0.036	-0.04	-0.035	-0.132	-0.065	-0.125	-0.08	-0.086	-0.067	-0.086	-0.024	0.005	0.028	0.058	-0.004	-0.036	0.014	-0.115	-0.113	-0.066	-0.038	-0.101
Supratrigeminal nucleus	-0.103	-0.016	-0.118	-0.138	-0.035	-0.083	-0.071	-0.106	-0.014	0.007	-0.031	0.009	-0.103	-0.087	-0.109	-0.223	-0.198	-0.086	-0.043	-0.136	-0.012	0.16	-0.022	-0.14	-0.124	-0.015	-0.129	-0.089	-0.136	-0.162	0.116	0.041	-0.033	-0.084	-0.019	-0.031	-0.059	-0.211	-0.036	-0.132	-0.133	-0.164	-0.133	-0.133	0.01	-0.136	-0.053	-0.077	0.076
Tegmental reticular nucleus	-0.151	-0.154	-0.157	-0.027	-0.075	-0.012	-0.012	0.002	-0.14	-0.081	-0.043	-0.036	-0.157	-0.124	-0.059	-0.184	-0.2	-0.1	-0.006	-0.109	-0.111	0.133	-0.108	-0.151	-0.136	-0.078	-0.052	-0.18	0.003	0.037	-0.016	-0.027	-0.145	-0.12	-0.034	-0.071	-0.043	-0.016	0.062	-0.055	-0.058	-0.02	0.017	0.054	-0.013	-0.143	-0.059	0.01	0.037
Motor nucleus of trigeminal	-0.054	0.007	-0.079	-0.126	-0.021	-0.125	-0.082	-0.138	0.036	0.025	-0.089	-0.021	-0.158	-0.129	-0.125	-0.239	-0.17	-0.175	-0.117	-0.19	0.005	0.081	-0.08	-0.147	-0.206	0.011	-0.152	-0.06	-0.174	-0.201	0.092	0.018	-0.066	-0.102	-0.025	-0.024	-0.092	-0.218	-0.109	-0.175	-0.119	-0.176	-0.158	-0.2	-0.003	-0.142	-0.082	-0.125	0.026
Abducens nucleus	-0.038	-0.073	0.008	-0.046	-0.135	-0.187	-0.134	-0.19	-0.012	-0.13	-0.207	-0.153	-0.19	-0.136	-0.172	-0.099	0.018	-0.238	-0.217	-0.208	0.038	-0.184	-0.153	0	-0.184	-0.031	-0.081	-0.021	-0.117	-0.134	-0.174	-0.032	-0.143	-0.064	-0.111	-0.075	-0.115	-0.089	-0.11	-0.106	-0.046	-0.084	-0.099	-0.14	-0.159	-0.116	-0.115	-0.094	-0.109
Facial motor nucleus	-0.071	-0.059	-0.095	-0.104	-0.052	-0.076	-0.032	-0.057	-0.043	-0.066	-0.142	-0.063	-0.171	-0.129	-0.075	-0.24	-0.168	-0.182	-0.093	-0.144	-0.019	0.094	-0.078	-0.138	-0.212	-0.067	-0.155	-0.09	-0.179	-0.172	-0.028	-0.027	-0.139	-0.12	-0.075	-0.078	-0.127	-0.187	-0.15	-0.213	-0.117	-0.161	-0.171	-0.192	-0.075	-0.163	-0.104	-0.142	-0.022
Superior central nucleus raph	-0.157	-0.164	-0.076	-0.032	-0.187	-0.051	-0.063	-0.048	-0.19	-0.167	-0.126	-0.129	-0.147	-0.1	-0.121	-0.075	-0.08	-0.077	-0.047	-0.074	-0.085	0.018	-0.088	-0.077	-0.067	-0.13	-0.084	-0.145	-0.028	0.145	-0.16	-0.087	-0.184	-0.086	-0.075	-0.076	-0.112	0.156	-0.018	-0.043	0.015	0.149	-0.028	0.057	-0.126	-0.126	-0.048	-0.048	-0.077
Locus ceruleus	-0.128	-0.038	-0.184	-0.085	-0.011	-0.024	-0.029	-0.027	-0.038	0.064	0.092	0.079	-0.038	-0.07	-0.1	-0.104	-0.18	0.035	0.046	-0.071	-0.12	0.21	-0.043	-0.089	0.081	0.051	-0.028	-0.14	0.017	-0.028	0.126	-0.05	-0.041	-0.134	0.007	-0.043	0.051	-0.119	0.17	0.046	-0.065	-0.087	-0.002	0.09	0.069	-0.142	-0.014	0.074	0.021
Nucleus incertus	-0.119	-0.114	-0.059	-0.049	-0.181	-0.133	-0.149	-0.165	-0.128	-0.16	-0.122	-0.126	-0.132	-0.099	-0.189	-0.019	-0.031	-0.083	-0.092	-0.137	-0.058	-0.041	-0.1	-0.035	-0.022	-0.087	-0.054	-0.095	-0.003	0.088	-0.143	-0.058	-0.148	-0.069	-0.079	-0.074	-0.085	0.104	0.038	0.037	0.032	0.133	-0.007	0.075	-0.122	-0.128	-0.065	-0.013	-0.089
Nucleus raph pontis	-0.005	-0.076	0.117	-0.027	-0.187	-0.148	-0.108	-0.143	-0.054	-0.186	-0.281	-0.235	-0.18	-0.098	-0.134	-0.04	0.091	-0.231	-0.23	-0.136	0.072	-0.271	-0.107	0.033	-0.177	-0.072	-0.118	0.026	-0.194	-0.076	-0.28	-0.083	-0.16	-0.007	-0.108	-0.057	-0.168	0.049	-0.254	-0.184	0.004	0.054	-0.172	-0.231	-0.232	-0.054	-0.099	-0.168	-0.178
Subceruleus nucleus	-0.124	-0.094	-0.076	-0.096	-0.104	-0.131	-0.112	-0.137	-0.039	-0.078	-0.111	-0.076	-0.117	-0.097	-0.15	-0.108	-0.076	-0.117	-0.098	-0.166	0.001	0.009	-0.058	-0.05	-0.052	0.01	-0.047	-0.046	-0.08	-0.127	-0.034	0.003	-0.082	-0.073	-0.042	-0.039	-0.006	-0.138	0.012	-0.085	-0.107	-0.109	-0.078	-0.098	-0.067	-0.123	-0.061	0.007	-0.022
Sublaterodorsal nucleus	-0.137	-0.072	-0.156	-0.079	-0.053	-0.073	-0.087	-0.092	-0.044	-0.006	0.03	0.023	-0.058	-0.072	-0.134	-0.062	-0.122	-0.005	0.007	-0.12	-0.076	0.134	-0.047	-0.038	0.066	0.028	0.015	-0.113	0.054	-0.026	0.056	-0.013	-0.056	-0.106	-0.019	-0.048	0.05	-0.1	0.205	0.075	-0.072	-0.076	0.048	0.108	0.026	-0.132	-0.025	0.109	0.01
Area postrema	0.086	0.018	0.042	-0.016	-0.144	-0.133	-0.109	-0.136	-0.058	-0.132	-0.147	-0.158	-0.114	-0.109	-0.114	-0.009	0.08	-0.163	-0.185	-0.114	-0.019	-0.22	-0.157	0	-0.124	-0.026	-0.083	0.018	-0.102	-0.035	-0.178	-0.099	-0.11	-0.045	-0.109	-0.081	-0.115	0.032	-0.154	-0.047	0.079	0.037	-0.096	-0.105	-0.159	-0.057	-0.092	-0.134	-0.145
Cochlear nuclei	0.123	0.065	0.016	-0.1	0.008	-0.056	0.027	0.03	0.023	-0.056	-0.088	-0.017	-0.142	-0.02	-0.048	-0.114	0.038	-0.049	-0.077	-0.038	0.112	-0.14	-0.108	-0.052	-0.208	0.055	-0.113	0.124	-0.165	-0.181	-0.141	0.03	-0.096	-0.006	0.007	0.068	-0.134	-0.143	-0.208	-0.126	0.03	-0.125	-0.156	-0.225	-0.052	0.029	-0.006	-0.175	-0.078
Cuneate nucleus	0.133	0.103	-0.008	-0.072	-0.112	-0.206	-0.17	-0.229	0.019	-0.082	-0.099	-0.118	-0.108	-0.149	-0.158	-0.063	0.014	-0.204	-0.232	-0.213	-0.025	-0.216	-0.193	-0.017	-0.136	0.054	-0.067	0.027	-0.103	-0.16	-0.081	-0.061	-0.051	-0.056	-0.102	-0.083	-0.046	-0.14	-0.104	-0.044	-0.051	-0.126	-0.097	-0.163	-0.102	-0.077	-0.103	-0.1	-0.092
Gracile nucleus	0.159	0.099	0.014	-0.031	-0.073	-0.152	-0.112	-0.158	0.028	-0.057	-0.064	-0.098	-0.056	-0.104	-0.084	-0.004	0.057	-0.16	-0.189	-0.146	-0.009	-0.213	-0.145	0.028	-0.105	0.028	-0.027	0.029	-0.058	-0.103	-0.093	-0.056	-0.031	-0.024	-0.079	-0.069	-0.037	-0.079	-0.092	-0.026	-0.02	-0.075	-0.053	-0.12	-0.082	-0.028	-0.083	-0.081	-0.079
External cuneate nucleus	0.122	0.154	0.004	-0.105	-0.091	-0.189	-0.159	-0.22	0.017	-0.067	-0.103	-0.093	-0.13	-0.136	-0.153	-0.163	-0.046	-0.204	-0.202	-0.197	-0.004	-0.115	-0.153	-0.091	-0.209	0.06	-0.126	0.077	-0.167	-0.201	0.005	-0.006	-0.031	-0.058	-0.087	-0.061	-0.086	-0.199	-0.164	-0.109	-0.052	-0.174	-0.161	-0.23	-0.074	-0.093	-0.101	-0.164	-0.039
Nucleus of the solitary tract	-0.025	0.016	-0.128	-0.094	-0.113	-0.157	-0.133	-0.171	-0.056	-0.098	-0.074	-0.057	-0.104	-0.127	-0.179	-0.119	-0.122	-0.095	-0.11	-0.179	-0.087	-0.008	-0.142	-0.092	-0.05	-0.016	-0.107	-0.1	-0.096	-0.119	-0.052	-0.08	-0.124	-0.128	-0.113	-0.113	-0.073	-0.164	-0.004	-0.053	-0.084	-0.135	-0.102	-0.04	-0.089	-0.176	-0.097	-0.053	-0.072
Spinal nucleus of the trigeminal_ caudal part	0.116	0.112	0.006	-0.098	-0.018	-0.053	-0.06	-0.083	0.001	-0.093	-0.081	-0.061	-0.033	-0.006	-0.011	-0.092	-0.037	-0.078	-0.049	-0.028	0.02	-0.051	-0.014	-0.025	-0.119	-0.054	-0.083	0.001	-0.125	-0.146	-0.056	0.026	-0.035	0.034	-0.073	-0.041	-0.1	-0.144	-0.141	-0.125	-0.081	-0.129	-0.134	-0.164	-0.058	-0.016	-0.039	-0.124	-0.013
Spinal nucleus of the trigeminal_ interpolar part	-0.044	-0.014	-0.084	-0.125	-0.014	-0.018	-0.046	-0.065	-0.037	-0.054	-0.069	-0.011	-0.1	-0.002	-0.047	-0.213	-0.172	-0.078	0.042	-0.056	0.053	0.135	0.018	-0.146	-0.186	-0.072	-0.125	-0.092	-0.141	-0.151	0.025	0.084	-0.063	0.006	-0.011	-0.006	-0.094	-0.187	-0.093	-0.163	-0.122	-0.156	-0.133	-0.163	0.034	-0.05	-0.002	-0.118	0.083
Spinal nucleus of the trigeminal_ oral part	-0.025	-0.031	-0.02	-0.104	-0.061	-0.063	-0.064	-0.091	-0.028	-0.089	-0.153	-0.079	-0.139	-0.039	-0.073	-0.175	-0.086	-0.147	-0.054	-0.08	0.079	0.009	-0.019	-0.086	-0.207	-0.064	-0.132	-0.046	-0.181	-0.175	-0.065	0.04	-0.09	0.004	-0.041	-0.012	-0.12	-0.16	-0.178	-0.19	-0.107	-0.139	-0.169	-0.222	-0.056	-0.049	-0.031	-0.157	0.005
Dorsal motor nucleus of the vagus nerve	0.04	0.014	-0.069	-0.019	-0.097	-0.147	-0.101	-0.14	-0.044	-0.065	-0.084	-0.065	-0.129	-0.133	-0.153	-0.065	-0.028	-0.132	-0.15	-0.153	-0.077	-0.108	-0.191	-0.055	-0.107	-0.018	-0.101	-0.069	-0.074	-0.049	-0.103	-0.121	-0.13	-0.119	-0.093	-0.089	-0.112	-0.056	-0.064	-0.008	0.037	-0.032	-0.072	-0.028	-0.093	-0.129	-0.096	-0.104	-0.117
Inferior olivary complex	-0.002	-0.075	0.014	-0.02	-0.13	-0.079	-0.053	-0.065	-0.081	-0.19	-0.209	-0.163	-0.137	-0.109	-0.065	-0.074	-0.007	-0.168	-0.137	-0.089	-0.037	-0.136	-0.12	-0.031	-0.134	-0.095	-0.076	-0.036	-0.108	-0.059	-0.207	-0.088	-0.159	-0.056	-0.136	-0.113	-0.123	-0.02	-0.137	-0.138	-0.051	-0.027	-0.104	-0.093	-0.183	-0.098	-0.099	-0.097	-0.114
Inferior salivatory nucleus	-0.075	-0.014	-0.103	-0.127	-0.013	-0.076	-0.065	-0.1	-0.001	-0.019	-0.06	-0.012	-0.096	-0.072	-0.08	-0.209	-0.181	-0.101	-0.038	-0.124	0.004	0.14	0.003	-0.136	-0.146	-0.049	-0.128	-0.098	-0.146	-0.165	0.092	0.057	-0.035	-0.05	-0.02	-0.031	-0.077	-0.203	-0.073	-0.156	-0.138	-0.168	-0.134	-0.158	0.001	-0.109	-0.056	-0.094	0.079
Linear nucleus of the medulla	-0.086	-0.038	-0.094	-0.097	-0.071	-0.096	-0.069	-0.097	-0.07	-0.084	-0.096	-0.044	-0.098	-0.077	-0.106	-0.169	-0.159	-0.09	-0.046	-0.155	-0.028	0.077	-0.036	-0.122	-0.107	-0.05	-0.102	-0.092	-0.117	-0.118	-0.01	-0.006	-0.1	-0.077	-0.061	-0.072	-0.061	-0.15	-0.053	-0.138	-0.124	-0.123	-0.118	-0.105	-0.056	-0.134	-0.074	-0.061	0.008
Lateral reticular nucleus	-0.031	-0.029	-0.054	-0.104	-0.072	-0.076	-0.048	-0.067	-0.061	-0.144	-0.183	-0.103	-0.166	-0.114	-0.07	-0.218	-0.142	-0.17	-0.091	-0.135	-0.04	0.039	-0.081	-0.129	-0.191	-0.079	-0.137	-0.09	-0.172	-0.16	-0.092	-0.04	-0.157	-0.096	-0.113	-0.11	-0.134	-0.168	-0.15	-0.21	-0.125	-0.14	-0.172	-0.184	-0.122	-0.157	-0.104	-0.133	-0.042
Magnocellular reticular nucleus	-0.085	-0.126	-0.076	-0.046	-0.139	-0.1	-0.08	-0.096	-0.1	-0.159	-0.183	-0.131	-0.17	-0.131	-0.12	-0.125	-0.083	-0.162	-0.116	-0.143	-0.055	-0.048	-0.127	-0.06	-0.137	-0.101	-0.093	-0.114	-0.087	-0.048	-0.165	-0.081	-0.178	-0.104	-0.118	-0.102	-0.122	-0.041	-0.074	-0.139	-0.081	-0.046	-0.086	-0.058	-0.144	-0.151	-0.094	-0.066	-0.088
Parasolitary nucleus	0.033	0.026	-0.047	-0.039	-0.077	-0.135	-0.111	-0.15	-0.01	-0.07	-0.069	-0.056	-0.076	-0.095	-0.129	-0.035	-0.019	-0.097	-0.121	-0.143	-0.044	-0.093	-0.124	-0.02	-0.047	0.012	-0.041	-0.036	-0.041	-0.085	-0.066	-0.052	-0.072	-0.067	-0.08	-0.071	-0.041	-0.092	-0.014	0.002	-0.037	-0.075	-0.039	-0.026	-0.068	-0.093	-0.07	-0.047	-0.069
Paragigantocellular reticular nucleus	-0.094	-0.094	-0.102	-0.114	-0.093	-0.072	-0.041	-0.049	-0.091	-0.151	-0.175	-0.105	-0.16	-0.119	-0.074	-0.22	-0.174	-0.154	-0.073	-0.132	-0.062	0.08	-0.069	-0.126	-0.154	-0.098	-0.138	-0.122	-0.158	-0.144	-0.104	-0.056	-0.177	-0.118	-0.11	-0.114	-0.122	-0.162	-0.115	-0.204	-0.145	-0.141	-0.164	-0.151	-0.124	-0.176	-0.11	-0.104	-0.055
Parapyramidal nucleus	-0.064	-0.106	-0.046	-0.061	-0.123	-0.071	-0.06	-0.056	-0.065	-0.16	-0.172	-0.139	-0.131	-0.109	-0.068	-0.11	-0.06	-0.147	-0.106	-0.1	-0.04	-0.057	-0.091	-0.028	-0.096	-0.078	-0.082	-0.072	-0.104	-0.087	-0.157	-0.068	-0.144	-0.082	-0.113	-0.098	-0.099	-0.072	-0.096	-0.132	-0.087	-0.07	-0.102	-0.088	-0.149	-0.123	-0.093	-0.07	-0.101
Lateral vestibular nucleus	-0.001	0.051	-0.044	-0.13	-0.081	-0.192	-0.128	-0.209	0.003	-0.051	-0.161	-0.084	-0.204	-0.155	-0.182	-0.256	-0.121	-0.241	-0.186	-0.248	0.044	-0.005	-0.139	-0.157	-0.282	0.052	-0.168	0.042	-0.211	-0.232	0.042	0.025	-0.085	-0.1	-0.068	-0.043	-0.125	-0.236	-0.187	-0.188	-0.079	-0.199	-0.193	-0.268	-0.062	-0.157	-0.116	-0.179	0.003
Medial vestibular nucleus	-0.04	-0.011	-0.129	-0.109	-0.127	-0.209	-0.161	-0.224	-0.042	-0.059	-0.095	-0.081	-0.209	-0.207	-0.219	-0.213	-0.105	-0.212	-0.187	-0.269	-0.063	-0.006	-0.21	-0.157	-0.193	0.141	-0.129	0.057	-0.132	-0.188	0.02	-0.03	-0.117	-0.161	-0.08	-0.069	-0.051	-0.219	-0.044	-0.055	0.029	-0.177	-0.109	-0.154	-0.058	-0.187	-0.112	-0.093	-0.036
Hypoglossal nucleus	-0.048	-0.052	-0.108	-0.03	-0.1	-0.122	-0.069	-0.102	-0.094	-0.082	-0.108	-0.054	-0.188	-0.144	-0.162	-0.157	-0.114	-0.139	-0.111	-0.167	-0.068	0.001	-0.182	-0.135	-0.17	-0.049	-0.141	-0.123	-0.103	-0.035	-0.098	-0.11	-0.187	-0.152	-0.087	-0.095	-0.144	-0.054	-0.077	-0.073	0.025	-0.028	-0.098	-0.042	-0.088	-0.173	-0.098	-0.121	-0.093
Nucleus x	-0.019	0.017	-0.058	-0.121	-0.049	-0.104	-0.078	-0.13	-0.017	-0.05	-0.099	-0.052	-0.125	-0.074	-0.102	-0.207	-0.129	-0.146	-0.081	-0.139	0.045	0.076	-0.031	-0.128	-0.204	-0.013	-0.131	-0.035	-0.165	-0.169	0.047	0.055	-0.048	-0.029	-0.029	-0.021	-0.088	-0.193	-0.129	-0.154	-0.1	-0.157	-0.153	-0.206	-0.016	-0.091	-0.061	-0.131	0.051
Nucleus y	0.11	0.037	0.224	0.012	-0.08	-0.215	-0.124	-0.213	0.167	-0.07	-0.264	-0.175	-0.142	-0.101	-0.147	0.018	0.199	-0.288	-0.335	-0.192	0.15	-0.42	-0.132	0.105	-0.205	0.026	-0.081	0.156	-0.203	-0.198	-0.236	-0.064	-0.079	0.02	-0.107	-0.034	-0.134	-0.05	-0.298	-0.159	0.013	-0.051	-0.176	-0.307	-0.214	-0.006	-0.119	-0.188	-0.203
Nucleus raph magnus	-0.013	-0.085	0.084	-0.023	-0.157	-0.101	-0.055	-0.071	-0.065	-0.163	-0.252	-0.2	-0.194	-0.111	-0.09	-0.105	0.023	-0.23	-0.195	-0.121	0.046	-0.198	-0.115	-0.025	-0.223	-0.082	-0.138	-0.018	-0.198	-0.088	-0.246	-0.088	-0.17	-0.044	-0.102	-0.065	-0.164	0.008	-0.252	-0.209	-0.006	0.017	-0.175	-0.236	-0.204	-0.074	-0.102	-0.178	-0.154
Nucleus raph obscurus	-0.043	-0.082	0.002	-0.016	-0.127	-0.084	-0.053	-0.068	-0.098	-0.155	-0.188	-0.138	-0.144	-0.086	-0.099	-0.077	-0.015	-0.138	-0.116	-0.104	-0.008	-0.115	-0.107	-0.05	-0.15	-0.101	-0.085	-0.065	-0.102	0	-0.181	-0.077	-0.146	-0.051	-0.099	-0.081	-0.125	0.043	-0.128	-0.131	-0.027	0.041	-0.094	-0.091	-0.15	-0.088	-0.083	-0.103	-0.103
Dentate nucleus	0.069	0.068	-0.027	-0.103	0.005	-0.086	-0.053	-0.095	0.045	0.01	-0.072	-0.003	-0.154	-0.035	-0.097	-0.168	-0.074	-0.119	-0.074	-0.113	0.144	-0.064	-0.092	-0.091	-0.23	0.023	-0.116	0.02	-0.159	-0.183	-0.024	0.068	-0.051	-0.012	0.034	0.064	-0.097	-0.168	-0.167	-0.141	-0.069	-0.15	-0.141	-0.219	0.042	0.003	-0.002	-0.154	-0.002
Fastigial nucleus	0.087	0.074	0.003	-0.084	-0.114	-0.229	-0.162	-0.237	0.019	-0.079	-0.141	-0.129	-0.144	-0.147	-0.173	-0.107	0.017	-0.237	-0.243	-0.241	0.041	-0.188	-0.173	-0.031	-0.193	0.1	-0.062	0.109	-0.13	-0.176	-0.059	0.009	-0.061	-0.061	-0.077	-0.045	-0.052	-0.145	-0.134	-0.088	-0.02	-0.132	-0.117	-0.214	-0.098	-0.084	-0.109	-0.111	-0.051
Interposed nucleus	0.064	0.082	-0.017	-0.12	-0.084	-0.182	-0.14	-0.22	0.013	-0.065	-0.138	-0.098	-0.171	-0.115	-0.161	-0.186	-0.047	-0.227	-0.18	-0.204	0.1	-0.081	-0.123	-0.1	-0.265	0.06	-0.128	0.086	-0.18	-0.212	0.004	0.068	-0.037	-0.027	-0.053	-0.008	-0.107	-0.199	-0.19	-0.141	-0.047	-0.169	-0.167	-0.258	-0.047	-0.069	-0.069	-0.169	0.001
Cerebellar cortex	0.254	0.204	0.036	-0.058	0.066	-0.111	-0.02	-0.081	0.144	0.06	0.022	0.027	-0.042	-0.053	-0.029	-0.028	0.055	-0.102	-0.151	-0.093	0.032	-0.22	-0.136	0.019	-0.145	0.033	-0.058	0.067	-0.101	-0.151	-0.05	-0.028	0.026	0.004	-0.036	-0.008	-0.057	-0.117	-0.151	-0.036	-0.007	-0.102	-0.098	-0.178	-0.028	0.034	-0.039	-0.137	-0.073
[truncated: 97 more columns]
