# Supplementary material for: Gene Expression in the Rodent Brain is Associated with Its Regional Connectivity
Source: PLoS Comput Biol. 2011 May 5;7(5):e1002040. doi: 10.1371/journal.pcbi.1002040 (PMC3088660; doi:10.1371/journal.pcbi.1002040)
Supplement: Table S4 — Linking between medical conditions and brain connectivity by document count and by number of genes that appear both in the relevant association study and in the genes selected as informative for connectivity. (XLS) [file pcbi.1002040.s006.xls]

## Sheet: Data
Number of connectivity indicative documents and the occurance of connectivity genes within the list of associated genes for various medical conditions
Condition	Number	Efferent	Afferent	Sum of
	of documents *	intersection **	intersection	intersections
Schizophrenia	13300	8	6	14
Autism	12200	10	6	16
bipolar	6130	8	2	10
Alzheimer's disease	5970	6	4	10
major depression	5340	9	2	11
Parkinson's disease	4140	6	5	11
Attention deficit	3800	9	7	16
anxiety disorder	3420	11	2	13
obesity	2820	3	2	5
glioma	1170	1	1	2
cardiovascular	0 ***	1	1	2
	* number of google-hits for <condition name>+"neuronal connectivity". Hits were measured between March28 and March 30, while "search history" was turned off.
	** HuGe 100 top rank SNP vs 500 genes chosen by 0norm SVM
	*** set to 0 as most results seems related to heart neurons
