# Supplementary material for: Gene Expression in the Rodent Brain is Associated with Its Regional Connectivity
Source: PLoS Comput Biol. 2011 May 5;7(5):e1002040. doi: 10.1371/journal.pcbi.1002040 (PMC3088660; doi:10.1371/journal.pcbi.1002040)
Supplement: Table S5 — Functional annotation groups that were found to be informative by the correlation test for the rodent data. (XLS) [file pcbi.1002040.s007.xls]

## Sheet: corr ef
Covariation correlation experiment - Outgoing
		Source genes	Random genes of same size
Functional annotation	Size	Correlation	Min Corr	Median Corr	Max Corr	P-value
axon	58	0.267995	0.103169	0.17548	0.25721	0
Ionic channel	238	0.267981	0.165558	0.210459	0.257784	0
transmission of nerve impulse	205	0.264347	0.162452	0.207507	0.258769	0
axonogenesis	136	0.263641	0.134121	0.200039	0.261683	0
calcium transport	41	0.263487	0.0944476	0.161255	0.24684	0
synaptic transmission	170	0.263086	0.158104	0.203941	0.255954	0
voltage-gated cation channel activity	120	0.260839	0.140494	0.197064	0.256782	0
cation channel activity	209	0.260494	0.15674	0.20793	0.252027	0
gated channel activity	246	0.260017	0.172833	0.211724	0.250748	0
ion channel activity	296	0.259422	0.175295	0.212835	0.247467	0
metal ion transmembrane transporter activity	249	0.25919	0.170964	0.211083	0.256326	0
substrate specific channel activity	306	0.257888	0.172982	0.213613	0.254126	0
channel activity	340	0.257798	0.177955	0.2151	0.248791	0
passive transmembrane transporter activity	340	0.257798	0.177955	0.2151	0.248791	0
neurite development	175	0.255371	0.154328	0.204456	0.254949	0
di-, tri-valent inorganic cation homeostasis	86	0.253969	0.11376	0.188501	0.251479	0
cellular morphogenesis during differentiation	166	0.253874	0.152175	0.204179	0.250248	0
neuron development	198	0.253777	0.164751	0.207221	0.251023	0
cellular di-, tri-valent inorganic cation homeostasis	85	0.253327	0.104858	0.185636	0.252467	0
blood circulation	87	0.252599	0.122867	0.187383	0.250908	0
neurogenesis	312	0.252594	0.176252	0.213794	0.250066	0
cell-cell signaling	303	0.252132	0.174966	0.212944	0.250469	0
neuron migration	48	0.250302	0.0887564	0.167218	0.245179	0
homeostatic process	294	0.25001	0.174526	0.212487	0.249689	0
glycoprotein	2415	0.245108	0.214972	0.227596	0.244574	0
neuron projection	106	0.276407	0.116614	0.193262	0.279469	0.001
metal ion transport	357	0.260989	0.180689	0.215374	0.26206	0.001
ion transport	397	0.257455	0.184748	0.216758	0.259092	0.001
neurite morphogenesis	146	0.256584	0.138701	0.200795	0.260782	0.001
neuron morphogenesis during differentiation	146	0.256584	0.146174	0.202501	0.257855	0.001
chemical homeostasis	202	0.256396	0.159802	0.206771	0.264242	0.001
potassium channel activity	118	0.255488	0.125554	0.197336	0.263201	0.001
regulation of multicellular organismal process	225	0.255042	0.159774	0.210776	0.256692	0.001
potassium ion transport	148	0.254848	0.148033	0.200202	0.256222	0.001
muscle development	148	0.253852	0.143241	0.202233	0.254175	0.001
Ion transport	75	0.253195	0.115665	0.183675	0.265066	0.001
generation of neurons	286	0.251808	0.17583	0.212953	0.25305	0.001
cell projection morphogenesis	245	0.249233	0.163033	0.210323	0.24963	0.001
di-, tri-valent inorganic cation transport	109	0.247269	0.132872	0.194795	0.2497	0.001
gliogenesis	43	0.245348	0.0778627	0.165194	0.24761	0.001
anatomical structure development	1644	0.242503	0.206042	0.226214	0.24464	0.001
diacylglycerol binding	44	0.242284	0.0751231	0.165361	0.245869	0.001
cellular calcium ion homeostasis	59	0.240222	0.100544	0.174345	0.256498	0.001
synaptosome	46	0.239162	0.0843579	0.165275	0.244428	0.001
centrosome	48	0.235793	0.0924854	0.167899	0.238686	0.001
neuromuscular process	40	0.232599	0.096252	0.159975	0.24425	0.001
regulation of neurotransmitter secretion	20	0.22911	0.0308136	0.130877	0.246966	0.001
voltage-gated channel	114	0.258235	0.133351	0.195435	0.258356	0.002
voltage-gated ion channel activity	157	0.254831	0.140013	0.203815	0.260009	0.002
voltage-gated channel activity	157	0.254831	0.155424	0.201673	0.258882	0.002
ion homeostasis	164	0.253427	0.153433	0.204125	0.263649	0.002
calcium ion transport	86	0.248739	0.1177	0.186446	0.255119	0.002
synapse	138	0.248309	0.135952	0.199653	0.254828	0.002
regulation of biological quality	583	0.247022	0.193701	0.220743	0.253445	0.002
C2 calcium-dependent membrane targeting	92	0.245326	0.127432	0.191138	0.246948	0.002
transmembrane transporter activity	779	0.24461	0.198528	0.223508	0.247375	0.002
alkali metal ion binding	165	0.243486	0.152281	0.204107	0.251399	0.002
cation homeostasis	97	0.242782	0.117913	0.192168	0.251496	0.002
system development	1392	0.242139	0.208601	0.226248	0.243689	0.002
circulatory system process	87	0.252599	0.120503	0.188485	0.264596	0.003
cellular homeostasis	203	0.24987	0.161822	0.207445	0.257809	0.003
cell projection organization and biogenesis	245	0.249233	0.16575	0.210539	0.272566	0.003
cellular ion homeostasis	146	0.246991	0.146174	0.202501	0.257855	0.003
cation transmembrane transporter activity	425	0.245719	0.186217	0.217393	0.249621	0.003
calmodulin-binding	80	0.2407	0.113933	0.185728	0.250798	0.003
calcium ion homeostasis	59	0.240222	0.0936073	0.175655	0.246737	0.003
glial cell differentiation	40	0.237138	0.0776097	0.162775	0.24185	0.003
cell part morphogenesis	245	0.249233	0.171352	0.211293	0.257028	0.004
C2	96	0.24568	0.129338	0.191688	0.259724	0.004
Axon guidance	115	0.24546	0.142861	0.197362	0.250214	0.004
ion transmembrane transporter activity	573	0.244072	0.186044	0.220548	0.24633	0.004
cellular structure morphogenesis	435	0.243269	0.183473	0.218144	0.245834	0.004
von Willebrand factor, type A	75	0.241021	0.102969	0.182737	0.265758	0.004
neurotransmitter secretion	47	0.24094	0.0821077	0.168282	0.251481	0.004
signal	2008	0.239742	0.21005	0.226826	0.24178	0.004
Cysteine-rich flanking region, C-terminal	69	0.238013	0.116615	0.179839	0.253589	0.004
repeat:LRR 4	75	0.23682	0.115373	0.183393	0.251235	0.004
neuromuscular process controlling balance	26	0.224365	0.0253542	0.143563	0.247156	0.004
synapse	200	0.248758	0.162764	0.207716	0.256115	0.005
cell junction	336	0.245888	0.182166	0.214712	0.255763	0.005
nervous system development	557	0.244676	0.18725	0.219949	0.252371	0.005
locomotory behavior	181	0.243357	0.154548	0.20589	0.251286	0.005
anatomical structure morphogenesis	946	0.242963	0.191652	0.223841	0.250183	0.005
tube development	163	0.241588	0.149246	0.204176	0.246676	0.005
VWA	79	0.241279	0.122934	0.185378	0.250164	0.005
adult behavior	53	0.238374	0.10825	0.171749	0.253794	0.005
dendrite	47	0.238147	0.0647039	0.165002	0.26062	0.005
cellular metal ion homeostasis	62	0.237116	0.0882089	0.176506	0.258581	0.005
neurotransmitter transport	41	0.235255	0.0912106	0.162249	0.248069	0.005
calcium channel activity	45	0.231684	0.0952815	0.164702	0.246897	0.005
cell migration	240	0.247729	0.15611	0.21136	0.256842	0.006
cell projection	342	0.247055	0.180889	0.215624	0.260144	0.006
ion transport	654	0.24269	0.188723	0.221571	0.249031	0.006
cellular cation homeostasis	96	0.242177	0.129094	0.190361	0.252499	0.006
detection of external stimulus	53	0.237494	0.099302	0.172969	0.247383	0.006
metal ion homeostasis	62	0.237116	0.116412	0.176726	0.261176	0.006
detection of stimulus	60	0.235238	0.0921223	0.17609	0.245932	0.006
GPCR, family 2, secretin-like	54	0.23434	0.106881	0.172562	0.255676	0.006
regulated secretory pathway	53	0.231921	0.099302	0.172969	0.247383	0.006
substrate-specific transmembrane transporter activity	664	0.244362	0.186877	0.221077	0.251624	0.007
regulation of neurotransmitter levels	77	0.242653	0.116035	0.183555	0.263571	0.007
tube morphogenesis	115	0.241412	0.131901	0.194047	0.260895	0.007
multicellular organismal development	1786	0.239781	0.211033	0.226466	0.246193	0.007
repeat:LRR 1	90	0.238562	0.119352	0.189731	0.262769	0.007
repeat:LRR 3	85	0.23631	0.124316	0.188178	0.251902	0.007
muscle contraction	69	0.23626	0.106131	0.182475	0.248457	0.007
sulfur metabolic process	62	0.234903	0.104922	0.177423	0.257809	0.007
cellular chemical homeostasis	146	0.246991	0.138701	0.200795	0.260782	0.008
skeletal muscle fiber development	57	0.228578	0.0818813	0.173838	0.252563	0.008
calcium	547	0.244929	0.185667	0.220613	0.252442	0.009
repeat:LRR 2	90	0.238562	0.121559	0.188494	0.249601	0.009
tyrosine-specific protein kinase	27	0.217126	0.0606158	0.144795	0.256971	0.009
neuron differentiation	252	0.247028	0.169883	0.211739	0.262187	0.01
cell morphogenesis	435	0.243269	0.190898	0.217473	0.259169	0.01
cation transport	439	0.243083	0.175645	0.219102	0.24728	0.01
cell motility	291	0.242535	0.174672	0.213089	0.255181	0.01
behavior	279	0.242077	0.174021	0.212774	0.250309	0.01
postsynaptic membrane	107	0.237847	0.129512	0.193746	0.255591	0.01
muscle system process	69	0.23626	0.100201	0.180484	0.268167	0.01
axon guidance	72	0.234699	0.101531	0.181736	0.26773	0.01
actin filament organization	47	0.226733	0.087649	0.167181	0.25179	0.01
morphogenesis of a branching structure	50	0.224418	0.0963502	0.16866	0.237612	0.01
gamma-aminobutyric acid signaling pathway	20	0.21226	0.0188005	0.132008	0.221442	0.01
amino acid derivative biosynthetic process	23	0.21086	0.0344782	0.136576	0.236822	0.01
calcium ion binding	733	0.242138	0.188571	0.222505	0.250468	0.011
muscle fiber development	57	0.228578	0.107733	0.172657	0.239762	0.011
regulation of GTPase activity	54	0.226299	0.0933027	0.173298	0.249769	0.011
smooth muscle contraction	27	0.217709	0.0621594	0.143342	0.233858	0.011
carbohydrate homeostasis	27	0.214521	0.0627955	0.144606	0.231171	0.011
regulation of neurological process	28	0.212124	0.0550181	0.143565	0.240599	0.011
cell adhesion	301	0.241129	0.174939	0.212962	0.250338	0.012
cell junction	247	0.240455	0.167926	0.211124	0.253673	0.012
regulation of growth	146	0.239776	0.149889	0.202058	0.251018	0.012
neurotransmitter binding	92	0.235455	0.128447	0.188757	0.253221	0.012
steroid binding	39	0.222224	0.0726412	0.160321	0.240304	0.012
synaptosome	22	0.20841	0.0350571	0.135269	0.23484	0.012
localization of cell	291	0.242535	0.174635	0.212726	0.255474	0.013
striated muscle development	114	0.239805	0.137623	0.196089	0.25583	0.013
neurotransmitter receptor activity	91	0.235142	0.0996859	0.189713	0.271575	0.013
LRRCT	71	0.234585	0.115736	0.181377	0.267107	0.013
calmodulin binding	96	0.234502	0.115497	0.191198	0.273198	0.013
generation of a signal involved in cell-cell signaling	80	0.233752	0.122648	0.185652	0.262025	0.013
Prostate cancer	78	0.233386	0.120662	0.184885	0.24928	0.013
Hormone receptor, extracellular	24	0.211291	0.0564014	0.138767	0.229221	0.013
Postsynaptic cell membrane	91	0.233458	0.125205	0.1889	0.249571	0.014
regulation of membrane potential	48	0.223153	0.0914564	0.166347	0.247119	0.014
Neurotransmitter-gated ion-channel transmembrane region	38	0.220066	0.066379	0.158996	0.24035	0.014
autophosphorylation	32	0.210496	0.0486715	0.150079	0.251821	0.014
receptor binding	515	0.241617	0.190788	0.219243	0.249474	0.015
extracellular ligand-gated ion channel activity	65	0.231909	0.110635	0.178029	0.255617	0.015
Long-term potentiation	62	0.227368	0.116412	0.176726	0.261176	0.015
Neurotransmitter-gated ion-channel	39	0.221326	0.0754837	0.161836	0.242573	0.015
glucose homeostasis	27	0.214521	0.0561101	0.144518	0.273326	0.015
central nervous system development	202	0.24123	0.160082	0.207928	0.252639	0.016
extracellular region part	1761	0.237735	0.209959	0.226915	0.242529	0.016
synapse organization and biogenesis	44	0.220104	0.0725641	0.165873	0.245105	0.016
potassium ion binding	97	0.233286	0.12931	0.191323	0.256328	0.017
solute:cation symporter activity	54	0.221866	0.096627	0.17123	0.253796	0.017
Neurotransmitter-gated ion-channel ligand-binding	39	0.221326	0.0779744	0.160418	0.254004	0.017
telencephalon development	20	0.204648	0.0340861	0.130726	0.234005	0.017
EGF-like region	201	0.239831	0.155026	0.20717	0.254001	0.018
growth	235	0.238025	0.15724	0.210747	0.257468	0.018
extracellular space	1656	0.237692	0.206144	0.226564	0.247227	0.018
Fibronectin, type III	143	0.237517	0.137495	0.200747	0.258297	0.018
FN3	146	0.237436	0.153618	0.201511	0.24907	0.018
actin filament-based process	168	0.236502	0.147913	0.204073	0.267446	0.018
second-messenger-mediated signaling	121	0.234985	0.138457	0.197545	0.254441	0.018
voltage-gated potassium channel activity	87	0.230642	0.121939	0.187235	0.257191	0.018
mRNA binding	31	0.213847	0.0445587	0.151163	0.239204	0.018
negative regulation of multicellular organismal process	27	0.201822	0.0532214	0.145069	0.246377	0.018
cytoskeleton organization and biogenesis	403	0.239297	0.186532	0.217302	0.252385	0.019
extracellular region	1869	0.237511	0.211242	0.226726	0.245568	0.019
cell projection part	68	0.227695	0.116905	0.180435	0.257491	0.019
Tyrosine protein kinase, active site	69	0.225018	0.101827	0.181324	0.250388	0.019
regulation of secretion	55	0.221612	0.0955529	0.172755	0.24931	0.019
monovalent inorganic cation transport	291	0.239446	0.179408	0.213695	0.255616	0.02
synapse part	115	0.234837	0.139382	0.195789	0.258206	0.02
protein phosphatase regulator activity	37	0.213163	0.0748361	0.158485	0.233842	0.02
potassium	92	0.229953	0.113052	0.188252	0.259441	0.021
organic acid transmembrane transporter activity	67	0.227338	0.0922623	0.180132	0.253664	0.021
Sterile alpha motif-type	53	0.223922	0.0846156	0.173045	0.242734	0.021
branching morphogenesis of a tube	47	0.220309	0.0917284	0.168174	0.244034	0.021
Helix-loop-helix DNA-binding	51	0.217445	0.0685033	0.168525	0.259397	0.021
potassium transport	86	0.230092	0.120363	0.186483	0.258451	0.022
GABA receptor activity	35	0.208453	0.0466248	0.154172	0.255476	0.022
GABA-A receptor activity	32	0.204003	0.0486715	0.150079	0.251821	0.022
neurogenesis	95	0.23145	0.117277	0.190203	0.258438	0.023
cytoskeletal protein binding	326	0.238371	0.172938	0.214798	0.24771	0.024
carboxylic acid transmembrane transporter activity	66	0.227557	0.111544	0.178351	0.255537	0.024
cell soma	50	0.220943	0.0869318	0.170009	0.244755	0.025
carbohydrate binding	237	0.236581	0.167479	0.21017	0.25868	0.026
tyrosine-protein kinase	86	0.2276	0.128363	0.187601	0.252371	0.026
phosphatase regulator activity	41	0.212569	0.0810977	0.162812	0.239905	0.026
organelle localization	34	0.209442	0.0584093	0.153144	0.247074	0.027
regulation of axonogenesis	29	0.199358	0.0676766	0.147748	0.227528	0.027
enzyme linked receptor protein signaling pathway	258	0.236192	0.169338	0.212192	0.255074	0.028
sodium	69	0.222385	0.102129	0.180801	0.24958	0.028
Ras GTPase activator activity	37	0.213802	0.0720585	0.156651	0.239711	0.028
establishment of organelle localization	25	0.202677	0.0560261	0.141132	0.262201	0.028
substrate-specific transporter activity	828	0.237653	0.198535	0.222937	0.251285	0.029
Renal cell carcinoma	59	0.224146	0.0986627	0.176072	0.24761	0.029
Sterile alpha motif SAM	67	0.223463	0.107121	0.179469	0.255928	0.029
phosphoric diester hydrolase activity	64	0.221904	0.106813	0.179995	0.248454	0.029
lipid binding	350	0.238602	0.175298	0.215524	0.253077	0.03
positive regulation of developmental process	74	0.226713	0.117319	0.182255	0.269959	0.03
sodium transport	80	0.226233	0.108712	0.18594	0.252488	0.03
phosphatase inhibitor activity	20	0.196192	0.0281775	0.130225	0.23916	0.03
organ development	1109	0.237747	0.205115	0.224966	0.246723	0.031
Palmitate	157	0.232606	0.147762	0.203683	0.258858	0.031
cytoplasmic vesicle	100	0.230561	0.115524	0.192639	0.274105	0.031
PH	205	0.233527	0.160221	0.208463	0.250652	0.032
amine transport	61	0.218383	0.0955797	0.177678	0.248202	0.032
Pleckstrin-like	193	0.233038	0.161004	0.208108	0.252625	0.033
SAM	67	0.223463	0.0922623	0.180132	0.253664	0.033
ear morphogenesis	49	0.215406	0.08123	0.168851	0.251936	0.033
Protein kinase C, phorbol ester/diacylglycerol binding	54	0.215403	0.0947245	0.172304	0.252406	0.033
Proteoglycan	35	0.208849	0.0688145	0.155738	0.247296	0.033
phosphotransferase	104	0.230369	0.13401	0.194019	0.259289	0.034
protein amino acid dephosphorylation	110	0.227768	0.133479	0.19519	0.250122	0.034
detection of abiotic stimulus	45	0.217603	0.093958	0.166139	0.245934	0.035
regulation of small GTPase mediated signal transduction	138	0.230485	0.149108	0.200613	0.259614	0.036
negative regulation of cell proliferation	116	0.227248	0.138236	0.195792	0.249258	0.036
maintenance of localization	17	0.181466	0.0239268	0.124802	0.236974	0.036
Fibronectin, type III-like fold	140	0.232415	0.135928	0.200705	0.255096	0.037
Phorbol-ester binding	36	0.207928	0.0727532	0.157265	0.238201	0.037
placenta development	23	0.195944	0.037555	0.139233	0.246175	0.037
manganese ion binding	122	0.228955	0.135545	0.196726	0.259146	0.038
cell fate commitment	80	0.224963	0.113933	0.185728	0.250798	0.038
extracellular structure organization and biogenesis	91	0.223707	0.127046	0.189657	0.252001	0.038
Melanogenesis	88	0.223683	0.127414	0.187622	0.256843	0.038
disease mutation	62	0.220757	0.094263	0.177793	0.245906	0.038
hormone secretion	42	0.210561	0.0811732	0.161933	0.248783	0.038
secretory granule	36	0.205424	0.0756949	0.15765	0.233477	0.038
ureteric bud development	29	0.198537	0.0542219	0.147976	0.244023	0.038
regulation of signal transduction	351	0.236396	0.173256	0.215278	0.252743	0.039
cell growth	103	0.22705	0.132268	0.192637	0.255846	0.039
regulation of Ras protein signal transduction	102	0.226283	0.129064	0.193293	0.246701	0.039
membrane depolarization	19	0.184301	0.0254051	0.128197	0.247248	0.039
transport	1109	0.236987	0.20219	0.224942	0.245357	0.04
ligand-gated ion channel activity	82	0.22471	0.11838	0.18643	0.249749	0.04
IQ calmodulin-binding region	67	0.22017	0.10084	0.179507	0.25601	0.04
nucleotide receptor activity, G-protein coupled	53	0.213846	0.0938894	0.171855	0.252348	0.04
peptide hormone secretion	26	0.194134	0.0509016	0.143663	0.258314	0.04
organ morphogenesis	418	0.236593	0.186896	0.217703	0.248238	0.041
ligand-gated channel activity	82	0.22471	0.126205	0.186997	0.268524	0.041
insulin secretion	21	0.188943	0.0391823	0.13138	0.239066	0.041
intracellular signaling cascade	989	0.236772	0.202289	0.223968	0.245964	0.042
actin cytoskeleton organization and biogenesis	158	0.231925	0.149816	0.202746	0.260798	0.042
amino acid derivative metabolic process	74	0.223066	0.117319	0.182255	0.269959	0.042
transmembrane receptor protein tyrosine kinase activity	56	0.213959	0.0876068	0.172056	0.261648	0.042
chloride	45	0.212287	0.0948981	0.164777	0.247191	0.042
protein amino acid N-linked glycosylation	21	0.190965	0.0152208	0.132466	0.250017	0.042
cation binding	2916	0.235734	0.213139	0.228051	0.239719	0.043
actin binding	220	0.234186	0.158222	0.209545	0.265732	0.043
small GTPase binding	50	0.213078	0.0943436	0.169785	0.25188	0.043
Potassium channel, voltage dependent, Kv, tetramerisation	42	0.208915	0.0706229	0.162132	0.241202	0.043
transmembrane receptor protein tyrosine kinase signaling pathway	165	0.229889	0.152559	0.203484	0.262623	0.044
microtubule-based process	152	0.229354	0.14524	0.201581	0.270195	0.044
Manganese	115	0.226663	0.134276	0.19616	0.256594	0.044
microtubule cytoskeleton organization and biogenesis	55	0.212383	0.099386	0.173337	0.252999	0.044
vesicle	277	0.234618	0.168571	0.212711	0.24908	0.045
small GTPase regulator activity	156	0.233171	0.15061	0.203005	0.254642	0.045
cAMP-mediated signaling	53	0.218652	0.106203	0.170576	0.249036	0.045
TBC	13	0.168339	0.020575	0.111652	0.212075	0.045
G-protein signaling, coupled to cAMP nucleotide second messenger	48	0.210908	0.0887564	0.167218	0.245179	0.046
cell adhesion	565	0.236648	0.189625	0.221548	0.247887	0.047
PDZ/DHR/GLGF	109	0.225733	0.136397	0.19522	0.252847	0.047
domain:PH	100	0.224522	0.130315	0.192476	0.253591	0.047
repeat:LRR 6	59	0.217918	0.0914357	0.176696	0.243983	0.047
nucleotide receptor activity	54	0.213956	0.0961924	0.172261	0.250334	0.047
cyclic-nucleotide-mediated signaling	56	0.213346	0.100999	0.173957	0.253079	0.047
biological adhesion	565	0.236648	0.188343	0.220056	0.248755	0.048
brain development	156	0.22872	0.150319	0.202388	0.254787	0.048
FAD binding	58	0.215903	0.088432	0.175577	0.240165	0.048
PDZ	116	0.226947	0.134706	0.196087	0.256628	0.049
Rab protein signal transduction	14	0.171609	0.0155983	0.114293	0.237122	0.049
regulation of cell size	112	0.226615	0.128763	0.193832	0.249658	0.05
phospholipase activity	51	0.209673	0.0892609	0.169272	0.258271	0.05
sodium ion transport	112	0.226664	0.132017	0.194446	0.255303	0.051
epithelial cell proliferation	28	0.188942	0.0550181	0.143565	0.240599	0.051
dephosphorylation	124	0.225746	0.135119	0.197772	0.251296	0.052
muscle cell differentiation	57	0.211146	0.0926973	0.173877	0.249997	0.053
regulation of multicellular organism growth	43	0.208171	0.0825071	0.164871	0.24349	0.053
alternative initiation	37	0.201979	0.0415773	0.159166	0.247183	0.053
lipoprotein	497	0.234485	0.186998	0.218775	0.249265	0.054
response to extracellular stimulus	19	0.18405	0.0246488	0.127912	0.228016	0.054
symporter activity	138	0.229002	0.135904	0.200005	0.255256	0.055
voltage-gated potassium channel complex	59	0.212852	0.0936073	0.175655	0.246737	0.055
amino acid transmembrane transporter activity	45	0.206356	0.0847183	0.166064	0.253132	0.055
detection of stimulus during sensory perception	40	0.203655	0.0782799	0.1617	0.23873	0.055
biogenic amine biosynthetic process	18	0.181966	0.0139501	0.126037	0.252131	0.055
regulation of Ras GTPase activity	20	0.184473	0.0423527	0.13219	0.24433	0.056
chloride transport	59	0.211579	0.0832604	0.174974	0.254077	0.057
Ras GTPase binding	47	0.207096	0.0789886	0.167083	0.258373	0.057
Rab GTPase activator activity	17	0.182485	0.0329444	0.124746	0.259402	0.057
biogenic amine metabolic process	58	0.212041	0.10632	0.173584	0.239664	0.058
cytoplasmic vesicle	271	0.233407	0.16942	0.213239	0.254613	0.059
regulation of myeloid cell differentiation	31	0.198527	0.0488394	0.150112	0.245235	0.059
non-membrane spanning protein tyrosine kinase activity	29	0.19482	0.0668389	0.148008	0.235076	0.059
homophilic cell adhesion	103	0.224401	0.134971	0.193579	0.252654	0.06
transporter activity	1104	0.235457	0.202329	0.224807	0.245716	0.061
cellular component organization and biogenesis	2057	0.234863	0.212882	0.227121	0.24394	0.062
Lipid-binding	74	0.216498	0.107917	0.184089	0.247162	0.063
gtpase activation	64	0.215618	0.092869	0.17727	0.251832	0.063
response to external stimulus	403	0.235048	0.180904	0.217413	0.248232	0.064
ear development	63	0.21235	0.104039	0.177517	0.257365	0.064
amino acid transport	50	0.20764	0.0908905	0.168841	0.251163	0.064
skeletal muscle development	88	0.220548	0.098009	0.189122	0.269997	0.065
metanephros development	41	0.20299	0.0704378	0.161552	0.237282	0.065
regulation of Rab protein signal transduction	14	0.171609	0.0108761	0.111892	0.238343	0.065
signal-anchor	275	0.232272	0.172785	0.211957	0.271252	0.066
membrane fusion	22	0.18464	0.0395415	0.135573	0.245818	0.066
regulation of Rab GTPase activity	14	0.171609	0.0231912	0.116394	0.234357	0.066
GTPase binding	54	0.208911	0.096627	0.17123	0.253796	0.068
regulation of lipid metabolic process	20	0.17656	0.0308136	0.130877	0.246966	0.068
DNA recombination	68	0.214327	0.103385	0.180386	0.253877	0.07
MAPK signaling pathway	230	0.231155	0.167784	0.209689	0.253635	0.071
Immunoglobulin I-set	97	0.219966	0.130315	0.191949	0.259392	0.073
organic acid transport	65	0.210491	0.0942072	0.178193	0.256454	0.073
protein depolymerization	26	0.193097	0.036669	0.142757	0.24025	0.073
RNA helicase, ATP-dependent, DEAD-box type	28	0.189288	0.0256813	0.146018	0.252322	0.073
peptide secretion	27	0.190702	0.0561101	0.144518	0.273326	0.074
ribosome biogenesis and assembly	116	0.222907	0.125215	0.196436	0.265265	0.075
sodium ion binding	82	0.216983	0.118206	0.186145	0.266263	0.076
developmental process	2363	0.233828	0.21419	0.227395	0.240863	0.077
chloride channel	38	0.200041	0.0795783	0.159974	0.247995	0.077
aminoglycan metabolic process	26	0.186956	0.0614986	0.141736	0.23294	0.077
Ricin B lectin	27	0.18502	0.0540533	0.144621	0.260315	0.077
Focal adhesion	167	0.226192	0.147887	0.203925	0.258451	0.078
peptide receptor activity	100	0.219104	0.130995	0.193531	0.24797	0.078
regulation of cell growth	88	0.218109	0.127862	0.187338	0.254616	0.078
heart development	136	0.223242	0.149061	0.199367	0.255986	0.079
lung development	56	0.208084	0.0983515	0.172466	0.259849	0.079
redox-active center	21	0.175196	0.0351039	0.13285	0.242836	0.079
glycosaminoglycan metabolic process	26	0.186956	0.057854	0.142449	0.229227	0.081
actin cytoskeleton	176	0.226676	0.157454	0.204473	0.263237	0.082
positive regulation of signal transduction	82	0.216604	0.12488	0.18668	0.260143	0.082
respiratory tube development	56	0.208084	0.105099	0.172564	0.240237	0.082
secretory pathway	168	0.227591	0.158885	0.204625	0.254286	0.084
RICIN	27	0.18502	0.0532214	0.145069	0.246377	0.084
Cleavage on pair of basic residues	180	0.228755	0.15886	0.206139	0.254025	0.085
ank repeat	167	0.227505	0.144747	0.205157	0.251719	0.085
RabGAP/TBC	11	0.158378	-0.0149286	0.102561	0.257031	0.085
neurotransmitter metabolic process	29	0.189215	0.0467896	0.148854	0.240644	0.086
intercellular junction	137	0.224204	0.145132	0.199107	0.255204	0.087
Ankyrin	160	0.225449	0.151821	0.202979	0.247051	0.088
phosphoprotein phosphatase activity	137	0.223816	0.137002	0.199353	0.255316	0.088
secretion by cell	199	0.229102	0.160435	0.207192	0.257638	0.09
G-protein signaling, coupled to cyclic nucleotide second messenger	51	0.204458	0.074641	0.17086	0.244593	0.09
protein tyrosine phosphatase activity	81	0.214495	0.116778	0.184829	0.251594	0.093
nitrogen compound catabolic process	57	0.205567	0.0983058	0.174609	0.255269	0.093
response to abiotic stimulus	149	0.224249	0.151192	0.201951	0.25853	0.094
negative regulation of cellular biosynthetic process	30	0.189548	0.0633443	0.149634	0.249369	0.094
secretion	245	0.228164	0.159194	0.211115	0.257338	0.096
ANK	178	0.226149	0.152335	0.204542	0.253339	0.097
leucine-rich repeat	203	0.226161	0.164563	0.207541	0.247776	0.098
membrane-bound vesicle	194	0.224822	0.160084	0.206578	0.259533	0.098
GPI anchor binding	99	0.218675	0.132922	0.191964	0.263991	0.098
Colorectal cancer	75	0.212361	0.116789	0.183262	0.265612	0.098
growth regulation	37	0.195102	0.0684323	0.157432	0.247612	0.098
cytoskeletal part	443	0.231299	0.185087	0.218631	0.252869	0.1
anion binding	48	0.200918	0.0951386	0.168403	0.255161	0.1
carboxylic acid transport	64	0.210577	0.106813	0.179995	0.248454	0.102
kidney development	58	0.206834	0.0856263	0.176204	0.244687	0.102
regulation of hydrolase activity	117	0.218689	0.137435	0.195002	0.253562	0.103
Tyrosine protein kinase	95	0.21543	0.126157	0.18955	0.253472	0.103
myristate	84	0.213284	0.106607	0.185611	0.263859	0.103
lipase activity	68	0.20849	0.114129	0.179533	0.252337	0.103
secondary active transmembrane transporter activity	183	0.224961	0.154698	0.206948	0.257202	0.107
cell fraction	448	0.231179	0.178488	0.21879	0.250923	0.108
ErbB signaling pathway	79	0.212561	0.122934	0.185378	0.250164	0.108
Leucine-rich repeat, cysteine-rich flanking region, N-terminal	82	0.212528	0.119484	0.187016	0.250103	0.108
Protein kinase, C-terminal	50	0.200138	0.101991	0.168575	0.250209	0.108
S_TK_X	50	0.200138	0.101991	0.168575	0.250209	0.108
Guanine-nucleotide dissociation stimulator, CDC24	30	0.184606	0.0540276	0.148071	0.23928	0.108
ribonucleoprotein binding	19	0.171057	0.041614	0.127981	0.256687	0.108
PIRSF002443:acetylcholine receptor	31	0.186206	0.0372163	0.150209	0.251743	0.109
Major facilitator superfamily MFS-1	59	0.203008	0.0874849	0.174471	0.261263	0.111
hyaluronic acid binding	16	0.16181	0.00899283	0.118752	0.239444	0.112
LRR_TYP	108	0.216879	0.131966	0.194813	0.258046	0.113
Symport	83	0.212877	0.122628	0.187114	0.263158	0.115
LRRNT	82	0.212528	0.126574	0.18562	0.246794	0.115
urogenital system development	63	0.205939	0.0966754	0.177271	0.242622	0.116
amine catabolic process	57	0.205567	0.100636	0.174608	0.252655	0.116
multicellular organism growth	51	0.201554	0.0969168	0.171184	0.240502	0.116
RNA helicase, DEAD-box type, Q motif	31	0.185024	0.0372163	0.150209	0.251743	0.117
elevation of cytosolic calcium ion concentration	19	0.168855	0.0129188	0.128731	0.250301	0.117
Rho guanyl-nucleotide exchange factor activity	62	0.204834	0.0960238	0.176853	0.241053	0.118
learning and/or memory	62	0.20509	0.109654	0.177192	0.252889	0.119
odontogenesis of dentine-containing teeth	32	0.18182	0.0486715	0.150079	0.251821	0.119
chloride ion binding	48	0.200918	0.0847456	0.168488	0.242266	0.12
Ras-association	38	0.188822	0.0539991	0.156805	0.257028	0.12
spermatogenesis	58	0.201206	0.0851699	0.173547	0.25919	0.121
Ras protein signal transduction	149	0.219812	0.149079	0.200645	0.251897	0.122
cytoplasmic membrane-bound vesicle	186	0.223645	0.159433	0.206111	0.25206	0.123
EGF-like	107	0.215058	0.129512	0.193746	0.255591	0.123
multicellular organismal homeostasis	22	0.171465	0.0325249	0.134565	0.266987	0.123
Guanylate kinase/L-type calcium channel region	21	0.172368	0.0394759	0.132923	0.244941	0.124
Endoplasmic reticulum targeting sequence	46	0.195982	0.0967151	0.165601	0.246658	0.125
tissue homeostasis	22	0.171465	0.0377238	0.134762	0.251249	0.125
neuropeptide signaling pathway	83	0.210843	0.107684	0.185364	0.26326	0.126
soluble fraction	59	0.202127	0.105755	0.175816	0.252311	0.126
odontogenesis	35	0.188919	0.079533	0.154333	0.230542	0.127
Pyridoxal phosphate-dependent transferase, major region, subdomain 1	27	0.180402	0.0634791	0.145105	0.246948	0.13
cell cycle control	22	0.172287	0.0176257	0.136017	0.224733	0.13
pigment biosynthetic process	23	0.175947	0.0478923	0.138813	0.24412	0.131
phosphoinositide binding	157	0.221772	0.140013	0.203815	0.260009	0.132
neuropeptide binding	43	0.192796	0.0695568	0.163934	0.258593	0.133
cholesterol transport	17	0.162287	0.0246266	0.124556	0.223577	0.134
small GTPase mediated signal transduction	344	0.228358	0.174443	0.215399	0.248881	0.135
regulation of developmental process	239	0.226121	0.167843	0.211125	0.251855	0.136
topological domain:Lumenal	195	0.223388	0.161029	0.208145	0.254045	0.138
organelle organization and biogenesis	928	0.23232	0.19757	0.224543	0.249811	0.139
domain:Ig-like C2-type 2	82	0.20923	0.124493	0.186067	0.262295	0.139
domain:Ig-like C2-type 1	82	0.20923	0.116582	0.184778	0.250712	0.139
exocytosis	64	0.206023	0.0896963	0.178877	0.252815	0.139
multicellular organism reproduction	53	0.197445	0.0923941	0.172654	0.249525	0.139
reproductive process in a multicellular organism	53	0.197445	0.1001	0.170097	0.248177	0.14
translation elongation factor activity	24	0.175327	0.0472622	0.139857	0.239571	0.14
Elongation factor	18	0.162813	0.0232025	0.124884	0.235715	0.14
glycosidase	54	0.200269	0.092109	0.172297	0.245514	0.141
secretin-like receptor activity	20	0.164545	0.0162613	0.130133	0.248263	0.141
phosphoric ester hydrolase activity	277	0.226745	0.171575	0.212099	0.269755	0.142
sh2 domain	83	0.208889	0.112542	0.186396	0.2636	0.142
sterol transport	18	0.163656	0.0369585	0.12706	0.251924	0.142
peripheral nervous system development	23	0.170646	0.0447608	0.137893	0.236948	0.143
phospholipid binding	195	0.222277	0.164228	0.2072	0.247426	0.145
GTPase activator activity	139	0.218475	0.150285	0.198841	0.259682	0.146
transmembrane protein	284	0.2258	0.174998	0.212842	0.24871	0.147
Cadherin	107	0.212807	0.136084	0.194087	0.246104	0.148
gland development	60	0.201168	0.103487	0.175679	0.256918	0.149
growth factor binding	50	0.197121	0.0869318	0.170009	0.244755	0.151
cell-cell adhesion	224	0.22381	0.16655	0.20916	0.2522	0.152
Phosphotyrosine interaction region	30	0.178269	0.0667625	0.148296	0.244128	0.152
rRNA metabolic process	56	0.19852	0.0953474	0.172556	0.253883	0.153
amine metabolic process	330	0.228244	0.172811	0.21577	0.251189	0.155
regulation of transport	82	0.207992	0.116582	0.184778	0.250712	0.155
rRNA processing	55	0.197205	0.0837037	0.171763	0.249968	0.155
Acute myeloid leukemia	50	0.19585	0.0979945	0.168861	0.25574	0.155
enzyme binding	179	0.222927	0.154666	0.205777	0.259516	0.156
extracellular matrix organization and biogenesis	49	0.194719	0.0854803	0.167724	0.257133	0.157
Leucine-rich repeat, typical subtype	105	0.212498	0.130352	0.19392	0.256528	0.158
ruffle	40	0.189529	0.0726508	0.162554	0.255244	0.161
positive regulation of multicellular organism growth	20	0.164149	0.0348221	0.131377	0.227876	0.161
intracellular non-membrane-bound organelle	1208	0.231619	0.195182	0.225107	0.246421	0.162
axon extension	22	0.170161	0.0381387	0.137502	0.246693	0.162
establishment of cellular localization	659	0.230581	0.195512	0.221137	0.248865	0.163
GPS	29	0.176343	0.0592145	0.14789	0.255125	0.163
regulation of cell differentiation	143	0.217611	0.144738	0.200744	0.247232	0.164
membrane fraction	392	0.228603	0.180395	0.216994	0.24909	0.166
negative regulation of neuron apoptosis	24	0.168912	0.0564014	0.138767	0.229221	0.166
Death	21	0.163496	0.0391823	0.13138	0.239066	0.167
Ras guanyl-nucleotide exchange factor activity	74	0.205271	0.108836	0.181947	0.246948	0.168
mammary gland development	17	0.155934	0.0246266	0.124556	0.223577	0.168
proteinaceous extracellular matrix	236	0.223218	0.161766	0.209538	0.253005	0.169
neuropeptide receptor activity	43	0.192796	0.0766513	0.164338	0.24486	0.169
non-membrane-bound organelle	1208	0.231619	0.205267	0.225169	0.245167	0.17
Ras GTPase	139	0.214916	0.144922	0.199599	0.252091	0.17
Voltage-dependent potassium channel	33	0.180376	0.0779484	0.152684	0.232336	0.17
TyrKc	99	0.210894	0.127075	0.192175	0.25301	0.172
sh3-binding	48	0.194266	0.0860512	0.171317	0.257258	0.172
activation of protein kinase activity	33	0.179727	0.0677555	0.153034	0.244998	0.172
tricarboxylic acid cycle	22	0.166995	0.0476737	0.135732	0.231474	0.172
SH2 motif	81	0.204549	0.117426	0.185026	0.254397	0.173
myoblast differentiation	32	0.180184	0.0622783	0.152074	0.237941	0.173
microtubule	158	0.217987	0.152239	0.203592	0.257322	0.174
Tumor Necrosis Factor	6	0.115507	-0.0156452	0.0762756	0.199314	0.174
GPS	30	0.176633	0.0650897	0.148578	0.253436	0.175
nitrogen compound biosynthetic process	73	0.2045	0.118671	0.182639	0.255183	0.176
Thrombospondin, type I	42	0.187187	0.0876922	0.164084	0.240013	0.176
microtubule cytoskeleton	270	0.224393	0.176442	0.212437	0.25408	0.178
exopeptidase activity	91	0.208222	0.125285	0.190746	0.258093	0.178
Alpha/beta hydrolase fold-1	24	0.166563	0.036965	0.139401	0.259109	0.178
cofactor binding	166	0.217887	0.153792	0.203625	0.262446	0.18
domain:SH3	95	0.208952	0.133897	0.190899	0.265538	0.18
hydrolase activity, acting on carbon-nitrogen (but not peptide) bonds	84	0.206847	0.116907	0.188175	0.25969	0.18
negative regulation of biosynthetic process	36	0.182132	0.0743863	0.155144	0.27539	0.18
cellular localization	676	0.230166	0.195673	0.222476	0.246797	0.181
nitrogen compound metabolic process	352	0.227377	0.173966	0.215753	0.253056	0.181
cell projection	75	0.203546	0.108387	0.18261	0.247949	0.182
extracellular matrix	242	0.223018	0.157844	0.210928	0.255494	0.184
actin-binding	143	0.216235	0.149989	0.201306	0.261544	0.185
tubulin binding	62	0.198912	0.094263	0.177793	0.245906	0.185
cell redox homeostasis	33	0.179912	0.0725384	0.153209	0.235365	0.186
anion channel activity	54	0.193788	0.0933027	0.173298	0.249769	0.187
negative regulation of growth	33	0.179999	0.0718417	0.153917	0.250751	0.188
acetyl-CoA catabolic process	23	0.165123	0.0344782	0.136576	0.236822	0.188
proto-oncogene	69	0.201356	0.116254	0.181409	0.249616	0.189
Neutrophil cytosol factor 2	28	0.1738	0.0528158	0.145947	0.259538	0.189
regulation of neuron differentiation	29	0.173755	0.0467896	0.148854	0.240644	0.19
pattern binding	82	0.203834	0.115518	0.185733	0.252466	0.191
peptide transport	35	0.179979	0.0417428	0.157326	0.247081	0.193
developmental maturation	85	0.205697	0.125704	0.187358	0.260101	0.194
Leucine-rich repeat	186	0.218913	0.158363	0.205968	0.257863	0.195
serine/threonine-specific protein kinase	35	0.178894	0.0785127	0.154374	0.2389	0.196
CD9/CD37/CD63 antigen	8	0.125024	0.0011573	0.0885797	0.216138	0.197
regulation of catalytic activity	278	0.223628	0.172079	0.212197	0.247622	0.198
blood vessel morphogenesis	151	0.215582	0.148382	0.200934	0.257497	0.198
anion transmembrane transporter activity	107	0.209622	0.122594	0.191742	0.254622	0.198
male gamete generation	156	0.215888	0.151227	0.203148	0.258489	0.201
Tetratricopeptide TPR-1	46	0.187792	0.0967151	0.165601	0.246658	0.201
stress response	40	0.183773	0.0518632	0.162746	0.24662	0.202
dna replication	70	0.201022	0.112169	0.181528	0.254098	0.204
sequence-specific DNA binding	380	0.225543	0.178618	0.216838	0.252324	0.205
spermatogenesis	156	0.215888	0.15061	0.203005	0.254642	0.207
DNA-dependent DNA replication	48	0.191631	0.0898895	0.169307	0.252821	0.207
SH2	82	0.204129	0.126574	0.18562	0.246794	0.208
somatic recombination of immunoglobulin gene segments	21	0.159446	0.0356762	0.132414	0.258249	0.208
Tetratricopeptide TPR2	31	0.174551	0.0692161	0.150849	0.255515	0.209
cyclin-dependent protein kinase activity	29	0.173089	0.0557002	0.147408	0.274163	0.209
Pleckstrin homology-type	212	0.220025	0.15944	0.20832	0.251806	0.21
egf-like domain	170	0.218306	0.150079	0.204673	0.251732	0.21
HEAT	54	0.193661	0.0873056	0.173135	0.244664	0.21
wd repeat	207	0.219583	0.159455	0.207312	0.262356	0.214
Small GTP-binding protein domain	137	0.214542	0.136074	0.200242	0.253619	0.214
DNA replication	127	0.212631	0.133116	0.198549	0.260024	0.214
positive regulation of transferase activity	91	0.204897	0.127556	0.188421	0.253414	0.214
autophagy	21	0.159791	0.0196556	0.13418	0.222738	0.214
DNA replication initiation	18	0.152731	0.0299652	0.12761	0.240601	0.214
differentiation	268	0.222348	0.168024	0.212426	0.261167	0.215
cell maturation	70	0.196854	0.115545	0.180584	0.255279	0.215
amine biosynthetic process	57	0.195195	0.0955982	0.174815	0.249878	0.215
vacuolar transport	18	0.155868	0.00872386	0.127177	0.250789	0.215
hormone metabolic process	69	0.197884	0.100201	0.180484	0.268167	0.216
Ras small GTPase, Rho type	21	0.158245	0.0467914	0.134437	0.255789	0.216
protein binding	4709	0.23114	0.22031	0.228642	0.239941	0.217
regulation of a molecular function	319	0.223701	0.177176	0.214371	0.254058	0.219
regulation of bone remodeling	23	0.160417	0.0538305	0.139191	0.234628	0.219
RhoGAP	36	0.179354	0.0710212	0.157844	0.239253	0.22
myeloid cell differentiation	84	0.203575	0.0934594	0.186952	0.272135	0.221
regulation of neurogenesis	42	0.182958	0.0962446	0.162369	0.247387	0.221
Helicase, superfamily 1 and 2, ATP-binding	78	0.201591	0.123015	0.184955	0.250744	0.222
cell proliferation	430	0.226376	0.182963	0.218073	0.251657	0.223
TPR repeat	76	0.201185	0.116392	0.183849	0.265461	0.224
DEAD-like helicase, N-terminal	81	0.202744	0.114217	0.185571	0.264976	0.226
activator	297	0.223721	0.164318	0.213543	0.253834	0.229
binding	9035	0.230684	0.222385	0.229244	0.23565	0.23
cell development	979	0.229789	0.195252	0.224381	0.246529	0.231
synaptic vesicle	27	0.166302	0.0618273	0.144837	0.246657	0.232
protein phosphatase	94	0.205184	0.128002	0.190328	0.255342	0.234
nuclear pore	49	0.187902	0.0806448	0.169134	0.243216	0.235
outer membrane	67	0.195931	0.104016	0.178622	0.244926	0.236
tissue development	229	0.220184	0.168764	0.209532	0.252215	0.237
Ras	107	0.206657	0.122594	0.191742	0.254622	0.237
Chromatin regulator	93	0.204627	0.124033	0.19135	0.258176	0.237
regulation of hormone secretion	20	0.153904	0.0346259	0.128452	0.236214	0.237
guanyl-nucleotide exchange factor activity	129	0.210638	0.139582	0.198439	0.253749	0.24
negative regulation of protein metabolic process	67	0.195821	0.10784	0.179769	0.251526	0.24
response to protein stimulus	56	0.191663	0.0997393	0.17396	0.257337	0.243
cellular respiration	29	0.169228	0.0457239	0.147306	0.239177	0.243
helicase	105	0.207603	0.124936	0.19423	0.252625	0.244
pigment metabolic process	29	0.16853	0.0652119	0.147404	0.252548	0.244
forebrain development	82	0.201545	0.117214	0.187391	0.256309	0.245
response to unfolded protein	56	0.191663	0.0863477	0.174451	0.24967	0.245
protein serine/threonine phosphatase activity	33	0.174322	0.0673075	0.152909	0.244884	0.245
regulation of Rho protein signal transduction	66	0.196209	0.11134	0.179456	0.249343	0.246
lipid transporter activity	41	0.177971	0.059312	0.160255	0.254801	0.247
somatic cell DNA recombination	23	0.15877	0.0366233	0.135748	0.229835	0.247
reproduction	332	0.223477	0.179169	0.214724	0.263623	0.248
cellular carbohydrate metabolic process	245	0.219855	0.171029	0.210763	0.248006	0.248
rrna processing	40	0.177876	0.0782799	0.1617	0.23873	0.249
regulation of neuron apoptosis	37	0.176499	0.0724717	0.158292	0.249636	0.249
transmembrane receptor protein serine/threonine kinase signaling pathway	72	0.195904	0.116784	0.181176	0.256174	0.25
chemokine binding	26	0.164886	0.048327	0.142466	0.237907	0.251
Ras small GTPase, Rab type	55	0.187597	0.097261	0.171686	0.262902	0.252
cell-cell adherens junction	24	0.16065	0.0563285	0.13943	0.255828	0.253
Kelch-type beta propeller	37	0.173537	0.0797044	0.156863	0.240058	0.254
somatic diversification of immune receptors via germline recombination within a single locus	23	0.15877	0.0344782	0.136576	0.236822	0.254
EGF	152	0.213813	0.14666	0.202887	0.251472	0.255
PIRSF001711:ADP-ribosylation factor	27	0.16406	0.0618273	0.144837	0.246657	0.257
nuclear pore complex	23	0.159318	0.037555	0.139233	0.246175	0.259
PIRSF001710:Ras-related protein Rab	57	0.190183	0.0915175	0.174631	0.250665	0.26
pyridoxal phosphate binding	41	0.176482	0.0817991	0.160818	0.239976	0.26
pore complex	54	0.187857	0.101554	0.171125	0.248025	0.261
sperm-egg recognition	16	0.141648	0.0179203	0.118885	0.242211	0.261
EGF	150	0.213172	0.138644	0.202155	0.255221	0.262
Nuclear hormone receptor, ligand-binding	36	0.174481	0.0636518	0.154617	0.253955	0.262
Steroid hormone receptor	35	0.174455	0.0702549	0.156208	0.238379	0.263
sarcoplasm	24	0.159531	0.046502	0.140014	0.259399	0.263
Integrin	62	0.1911	0.0962732	0.17679	0.256658	0.265
epithelial cell differentiation	32	0.171278	0.0345785	0.153446	0.253611	0.265
PAS	27	0.163706	0.0621594	0.143342	0.233858	0.265
photoreceptor cell differentiation	19	0.149677	0.034412	0.130468	0.233094	0.266
establishment of localization	2150	0.230548	0.21293	0.227509	0.240773	0.268
protein-tyrosine kinase activity	261	0.220638	0.166422	0.21188	0.25139	0.268
coenzyme binding	116	0.208615	0.141225	0.197788	0.253305	0.268
leukocyte differentiation	115	0.208413	0.142861	0.197362	0.250214	0.268
production of molecular mediator of immune response	27	0.16282	0.0484934	0.143133	0.240536	0.268
P2 purinoceptor	20	0.151322	0.0351745	0.130054	0.260961	0.27
positive regulation of catalytic activity	149	0.212335	0.148829	0.202317	0.257367	0.271
amino acid and derivative metabolic process	276	0.220408	0.177315	0.212719	0.25455	0.273
sugar transport	28	0.163581	0.0516671	0.146381	0.241206	0.273
Coagulation factor 5/8 type, C-terminal	18	0.146789	0.0243007	0.126163	0.214789	0.273
mutagenesis site	340	0.223054	0.169664	0.216149	0.248772	0.274
cell cortex	46	0.180602	0.083603	0.165	0.243558	0.275
regulation of cell proliferation	290	0.219723	0.170823	0.212642	0.256178	0.277
Nucleotidyltransferase	65	0.19346	0.0962208	0.179492	0.249831	0.277
macromolecular complex	1706	0.229891	0.204163	0.226572	0.247915	0.278
Direct protein sequencing	889	0.22823	0.187926	0.223706	0.246976	0.278
amino acid catabolic process	48	0.183208	0.0858476	0.167505	0.258217	0.279
guanine-nucleotide releasing factor	68	0.193079	0.110364	0.18086	0.263061	0.28
Notch signaling pathway	49	0.184101	0.0959408	0.169749	0.239587	0.28
immunoglobulin production	27	0.16282	0.0621594	0.143342	0.233858	0.28
Rho protein signal transduction	86	0.198619	0.120363	0.186483	0.258451	0.282
PIRSF002350:calmodulin	24	0.157326	0.0477262	0.138231	0.239348	0.282
neuropeptide Y receptor activity	34	0.167206	0.0473076	0.15332	0.247947	0.284
inorganic anion transport	144	0.210018	0.140963	0.199964	0.257771	0.285
clathrin-coated vesicle	71	0.195636	0.102476	0.181997	0.248707	0.285
protein oligomerization	45	0.180222	0.0952815	0.164702	0.246897	0.286
fad	86	0.199927	0.118504	0.18909	0.25926	0.288
RhoGEF	51	0.184762	0.0908287	0.170674	0.250056	0.288
G-protein signaling, coupled to IP3 second messenger (phospholipase C activating)	35	0.171118	0.0688145	0.155738	0.247296	0.289
coenzyme catabolic process	28	0.164854	0.0318237	0.14777	0.253759	0.289
positive regulation of kinase activity	87	0.198727	0.117529	0.187008	0.248301	0.29
DNA/RNA helicase, DEAD/DEAH box type, N-terminal	49	0.183737	0.0867641	0.169054	0.247747	0.29
Guanylate kinase	18	0.145958	0.0294343	0.125425	0.233107	0.291
positive regulation of T cell proliferation	20	0.150997	0.0188005	0.132008	0.221442	0.292
fatty acid biosynthetic process	61	0.190648	0.10504	0.176576	0.26076	0.294
electron carrier activity	161	0.2132	0.145668	0.204288	0.256879	0.295
Tetratricopeptide-like helical	74	0.194578	0.117225	0.182378	0.265432	0.296
cytosolic calcium ion homeostasis	21	0.151218	0.0286428	0.131979	0.235036	0.296
splice variant	1627	0.22937	0.210535	0.226546	0.245059	0.297
ARF/SAR superfamily	29	0.161517	0.0520273	0.146314	0.257439	0.297
WD40	195	0.215001	0.160021	0.20688	0.258275	0.298
DEXDc	90	0.201651	0.128762	0.190574	0.247698	0.298
enzyme activator activity	196	0.215561	0.161292	0.2074	0.254359	0.299
protein complex	1398	0.229215	0.206823	0.226082	0.248992	0.3
BTB/POZ fold	132	0.208553	0.146035	0.199885	0.259762	0.301
RAB	56	0.186225	0.0916568	0.173731	0.25233	0.304
Golgi vesicle transport	68	0.191269	0.0962508	0.179564	0.249727	0.306
DH	51	0.184762	0.0969168	0.171184	0.240502	0.306
positive regulation of locomotion	18	0.142893	0.0287586	0.12772	0.231932	0.306
GTPase regulator activity	285	0.220942	0.170289	0.213798	0.253883	0.308
Aspartic acid and asparagine hydroxylation site	81	0.196853	0.109292	0.186731	0.249403	0.308
positive regulation of cell motility	18	0.142893	0.02992	0.12564	0.238844	0.308
blood vessel development	176	0.212087	0.145157	0.204616	0.257683	0.31
sensory organ development	147	0.210741	0.150258	0.202214	0.251078	0.31
Armadillo	31	0.165601	0.0692161	0.150849	0.255515	0.31
regulation of progression through mitotic cell cycle	23	0.152743	0.0508437	0.138355	0.244404	0.31
phosphoinositide-mediated signaling	49	0.181705	0.0806448	0.169134	0.243216	0.311
transport	2093	0.229572	0.210041	0.227246	0.246313	0.312
binding site:ATP	317	0.220489	0.177401	0.215377	0.254047	0.313
AP-type membrane coat adaptor complex	25	0.154258	0.0386764	0.140256	0.254765	0.313
PIRSF000564:kinase-related transforming protein	30	0.163193	0.0553482	0.151507	0.252302	0.315
pyridoxal phosphate	45	0.178702	0.0847183	0.166064	0.253132	0.318
ATP-dependent helicase activity	91	0.200017	0.123166	0.190488	0.247861	0.319
Tetratricopeptide region	63	0.188345	0.103117	0.177316	0.255999	0.319
alternative splicing	2702	0.229736	0.215423	0.227785	0.242556	0.32
Secreted	959	0.226991	0.200185	0.224203	0.250646	0.32
tumor necrosis factor receptor binding	9	0.111828	0.000996078	0.094618	0.211312	0.321
metalloprotease	125	0.206063	0.137416	0.198647	0.260263	0.322
tumor necrosis factor receptor superfamily binding	9	0.111828	-0.025106	0.0943273	0.223131	0.323
EGF_CA	82	0.196602	0.118206	0.186145	0.266263	0.324
polysaccharide binding	76	0.193124	0.112942	0.183816	0.263499	0.324
sexual reproduction	238	0.217046	0.157085	0.21101	0.256967	0.325
glycosaminoglycan binding	71	0.192248	0.117159	0.181961	0.242064	0.325
cytoskeleton	732	0.226151	0.194834	0.222359	0.250705	0.326
G-protein-coupled receptor binding	54	0.184276	0.092109	0.172297	0.245514	0.327
DNA/RNA helicase, C-terminal	74	0.193155	0.115417	0.182817	0.253138	0.328
Nuclear hormone receptor, ligand-binding, core	35	0.169463	0.0729037	0.156026	0.247009	0.328
porin activity	26	0.157107	0.036669	0.142757	0.24025	0.328
metalloendopeptidase activity	98	0.200286	0.13349	0.192064	0.261273	0.329
hydrolase activity, hydrolyzing O-glycosyl compounds	93	0.198769	0.126234	0.189986	0.26144	0.329
chemokine receptor activity	25	0.155606	0.0560261	0.141132	0.262201	0.329
extracellular matrix	157	0.210077	0.15704	0.202481	0.259178	0.33
vasculature development	179	0.212997	0.154666	0.205777	0.259516	0.332
nucleotide phosphate-binding region:GTP	180	0.211833	0.154528	0.204961	0.253408	0.332
glutamine family amino acid metabolic process	34	0.16553	0.0467834	0.154375	0.249512	0.332
myristylation	24	0.154658	0.0501227	0.140375	0.242122	0.333
tetrapyrrole metabolic process	18	0.139413	0.0287586	0.12772	0.231932	0.333
gamete generation	203	0.215315	0.155242	0.208764	0.250574	0.335
protein kinase regulator activity	60	0.187254	0.10571	0.176178	0.259887	0.335
Ubiquitin-conjugating enzyme, E2	17	0.138453	0.0308053	0.125518	0.226051	0.337
somatic diversification of immunoglobulins	25	0.152851	0.0438388	0.139063	0.242734	0.338
flavoprotein	92	0.199143	0.115873	0.190612	0.249733	0.339
EGF-like, type 3	147	0.208097	0.144775	0.201057	0.245529	0.34
adenyl nucleotide binding	1220	0.228281	0.202538	0.225227	0.248105	0.341
lipid degradation	60	0.185062	0.106125	0.174456	0.251021	0.341
Developmental protein	539	0.224613	0.185557	0.220264	0.252158	0.342
nucleolus	117	0.204561	0.137711	0.197135	0.259455	0.342
carbohydrate transmembrane transporter activity	41	0.172373	0.0760696	0.162248	0.256525	0.344
porphyrin metabolic process	18	0.139413	0.02992	0.12564	0.238844	0.344
detection of light stimulus	25	0.154665	0.0488221	0.142366	0.245767	0.345
response to radiation	87	0.195526	0.122734	0.187515	0.266422	0.346
clathrin adaptor complex	25	0.154258	0.0560261	0.141132	0.262201	0.346
BTB/POZ-like	131	0.205062	0.146144	0.197219	0.257651	0.347
acylglycerol metabolic process	27	0.15662	0.0629703	0.146365	0.238675	0.347
AAA ATPase, subdomain	22	0.147158	0.0325249	0.134565	0.266987	0.347
peptide binding	124	0.204557	0.142527	0.198434	0.247961	0.35
superoxide metabolic process	21	0.146772	0.0420419	0.132536	0.23723	0.35
negative regulation of metabolic process	316	0.219319	0.176441	0.214319	0.252736	0.352
anion transport	171	0.210754	0.148093	0.205034	0.262289	0.352
myelination	28	0.156935	0.0533503	0.145771	0.271839	0.352
sugar transmembrane transporter activity	40	0.171832	0.0786495	0.160823	0.246121	0.353
response to organic substance	31	0.162642	0.0605641	0.153406	0.255026	0.353
Major facilitator superfamily	66	0.189302	0.106143	0.180538	0.249805	0.355
TPR	68	0.18934	0.115349	0.180338	0.245318	0.356
ubiquitin ligase complex	39	0.171272	0.0779744	0.160418	0.254004	0.356
heme metabolic process	16	0.133585	0.0182628	0.121902	0.227788	0.356
cellular developmental process	1443	0.227863	0.203896	0.225781	0.244456	0.357
response to drug	28	0.157383	0.0369003	0.146145	0.227959	0.358
transcription factor	34	0.164304	0.0770449	0.153423	0.236803	0.359
negative regulation of translation	27	0.155462	0.053538	0.144368	0.239794	0.359
Sugar transporter superfamily	26	0.153226	0.0385385	0.142377	0.261663	0.359
Serine/threonine protein kinase	174	0.211614	0.14045	0.205827	0.252777	0.361
positive regulation of protein kinase activity	83	0.194109	0.117209	0.186957	0.249885	0.361
Phox-like	43	0.173782	0.0821318	0.163765	0.256741	0.361
chromosome, telomeric region	11	0.117979	0.00221337	0.103992	0.225117	0.361
negative regulation of cellular metabolic process	281	0.217654	0.168434	0.212875	0.255296	0.362
ribonucleoprotein complex biogenesis and assembly	190	0.211806	0.158449	0.206245	0.256767	0.362
glycogen metabolic process	31	0.158546	0.0612719	0.148099	0.246529	0.362
phosphorus metabolic process	720	0.225407	0.195813	0.222548	0.24586	0.363
embryonic morphogenesis	155	0.20826	0.15186	0.202661	0.259358	0.363
helicase activity	125	0.20456	0.149449	0.198652	0.259419	0.363
cell-cell recognition	17	0.134851	0.0235067	0.124924	0.228544	0.363
chromatin binding	98	0.198179	0.126415	0.191449	0.257518	0.364
erythrocyte differentiation	33	0.163627	0.0718417	0.153917	0.250751	0.365
positive regulation of cell differentiation	49	0.177672	0.0916487	0.168726	0.251778	0.367
PX	43	0.173782	0.0757	0.163795	0.245505	0.367
hemopoiesis	187	0.211761	0.16282	0.205893	0.248331	0.368
SH3	169	0.210131	0.154021	0.204536	0.250027	0.369
positive regulation of growth	23	0.148808	0.0340316	0.13746	0.248302	0.369
intracellular protein transport across a membrane	40	0.168342	0.0833399	0.15995	0.242032	0.37
nuclear import	53	0.178955	0.0965501	0.171696	0.24955	0.371
axon ensheathment	30	0.157277	0.0598472	0.148559	0.275685	0.372
catecholamine metabolic process	24	0.15063	0.0420662	0.140702	0.241037	0.372
lyase	106	0.200365	0.116614	0.193262	0.279469	0.374
EGF-like calcium-binding	80	0.19231	0.124926	0.186122	0.261781	0.374
wide pore channel activity	43	0.173272	0.0825071	0.164871	0.24349	0.374
Zinc finger, nuclear hormone receptor-type	34	0.161955	0.0467834	0.154375	0.249512	0.374
phenol metabolic process	24	0.15063	0.0349622	0.139379	0.248142	0.374
s-adenosyl-l-methionine	53	0.178595	0.0778805	0.170823	0.246881	0.375
double-strand break repair	21	0.143118	0.0351039	0.13285	0.242836	0.375
ubl conjugation	251	0.214988	0.163822	0.210413	0.247845	0.376
tRNA aminoacylation	53	0.178485	0.0778805	0.170823	0.246881	0.376
eye morphogenesis	40	0.166844	0.0607307	0.159047	0.255539	0.378
cell differentiation	1443	0.227863	0.204323	0.225928	0.240995	0.381
integrin-mediated signaling pathway	84	0.193968	0.123061	0.187952	0.243405	0.381
cholesterol metabolic process	60	0.183775	0.0921223	0.17609	0.245932	0.381
glycerol ether metabolic process	28	0.156317	0.0618031	0.146629	0.257101	0.381
glycerolipid metabolic process	28	0.156317	0.0618031	0.146629	0.257101	0.381
enzyme regulator activity	592	0.223528	0.18694	0.221008	0.249663	0.382
translocation	41	0.170668	0.073864	0.160808	0.252233	0.382
glycoprotein metabolic process	84	0.192519	0.124323	0.186425	0.261779	0.383
lipid transport	39	0.167954	0.0788436	0.16047	0.237062	0.383
phosphate metabolic process	720	0.225407	0.193885	0.223047	0.250875	0.384
organic acid biosynthetic process	65	0.186006	0.106456	0.178436	0.256343	0.384
kinase binding	63	0.186352	0.099867	0.179811	0.246741	0.385
glucan metabolic process	31	0.158546	0.0644757	0.150657	0.253964	0.385
ensheathment of neurons	30	0.157277	0.049989	0.148978	0.239556	0.385
negative regulation of biological process	831	0.22596	0.200288	0.223479	0.248861	0.387
purine nucleotide binding	1492	0.227719	0.20296	0.225867	0.24549	0.388
phosphoric monoester hydrolase activity	218	0.213496	0.166711	0.209757	0.253431	0.388
tRNA aminoacylation for protein translation	53	0.178485	0.0889924	0.17165	0.251175	0.388
B cell activation	70	0.187284	0.102579	0.181191	0.252903	0.389
amino acid activation	53	0.178485	0.10825	0.171749	0.253794	0.39
chemotaxis	99	0.19589	0.135263	0.190302	0.251503	0.391
response to light stimulus	67	0.185511	0.10084	0.179507	0.25601	0.391
carbohydrate metabolism	57	0.182687	0.0849417	0.175776	0.250617	0.391
nuclear transport	95	0.195873	0.122246	0.190814	0.258106	0.393
structural molecule activity	464	0.222099	0.186747	0.21938	0.251966	0.394
phototransduction	21	0.141797	0.0356762	0.132414	0.258249	0.394
aminoacyl-tRNA ligase activity	57	0.178963	0.0846807	0.17311	0.260099	0.395
sulfur compound biosynthetic process	34	0.163281	0.0670149	0.154507	0.236013	0.395
S_TKc	290	0.216921	0.173946	0.213831	0.256869	0.396
hydrolase activity, acting on glycosyl bonds	112	0.200673	0.120328	0.19525	0.256679	0.396
tight junction	64	0.183692	0.0907068	0.178043	0.255925	0.397
E1-E2 ATPase-associated region	24	0.146486	0.0477262	0.138231	0.239348	0.397
alpha-beta T cell differentiation	20	0.140373	0.0273556	0.130245	0.233507	0.398
photoreceptor cell development	16	0.130282	0.0290759	0.122674	0.226052	0.399
protein kinase activity	494	0.222811	0.183146	0.220042	0.247196	0.4
WD40 repeat	176	0.208825	0.15715	0.205614	0.255639	0.4
cofactor catabolic process	32	0.157716	0.0510601	0.150817	0.23975	0.4
cellular process	8987	0.229797	0.223563	0.229262	0.235432	0.401
regulation of cellular component organization and biogenesis	54	0.17849	0.101554	0.171125	0.248025	0.401
detection of light stimulus during visual perception	23	0.144485	0.0344782	0.136576	0.236822	0.401
Zinc finger, DHHC-type	23	0.146736	0.0505227	0.138457	0.246435	0.402
clathrin vesicle coat	33	0.158909	0.0698122	0.152646	0.232123	0.403
negative regulation of transcription, DNA-dependent	164	0.207935	0.146754	0.204202	0.257525	0.406
cellular protein complex assembly	40	0.169666	0.0726508	0.162554	0.255244	0.406
microsome	122	0.200176	0.140512	0.194987	0.255795	0.407
cellular response to stimulus	27	0.151055	0.0484934	0.143133	0.240536	0.407
detection of light stimulus during sensory perception	23	0.144485	0.0327359	0.138088	0.264452	0.407
detection of visible light	23	0.144485	0.0531304	0.136892	0.260058	0.408
carboxylic acid biosynthetic process	65	0.186006	0.107651	0.18073	0.248117	0.409
O-acyltransferase activity	30	0.156333	0.0458068	0.1496	0.233116	0.409
taxis	99	0.19589	0.129787	0.191535	0.257844	0.411
G-protein signaling, adenylate cyclase activating pathway	31	0.156728	0.0691996	0.149208	0.24265	0.411
IPT	29	0.152006	0.0528888	0.145735	0.249798	0.411
nucleocytoplasmic transport	95	0.195873	0.129169	0.190867	0.248115	0.412
acetyl-CoA metabolic process	33	0.159628	0.0673075	0.152909	0.244884	0.412
RNA localization	52	0.175548	0.0975933	0.169879	0.246631	0.413
phosphotransferase activity, nitrogenous group as acceptor	27	0.151984	0.0606158	0.144795	0.256971	0.413
actin filament	24	0.148551	0.0522517	0.141175	0.245282	0.413
fatty acid oxidation	24	0.145314	0.0134503	0.139338	0.248534	0.417
adenyl ribonucleotide binding	1159	0.226108	0.204952	0.224845	0.244799	0.419
vesicular fraction	125	0.201504	0.132518	0.198059	0.250623	0.42
UDP-glycosyltransferase activity	81	0.189779	0.108676	0.185942	0.258841	0.42
mRNA transport	47	0.172341	0.0908779	0.167282	0.249199	0.42
cell projection biogenesis	55	0.176836	0.0962775	0.171936	0.256572	0.421
sugar:hydrogen ion symporter activity	39	0.167017	0.0754837	0.161836	0.242573	0.421
domain:Protein kinase	289	0.21619	0.169662	0.213553	0.249976	0.423
nuclear membrane	62	0.180854	0.0920426	0.176529	0.257587	0.423
meiosis	60	0.179414	0.0919529	0.175237	0.256758	0.423
Kelch related	48	0.172918	0.0873006	0.167697	0.249969	0.423
di-, tri-valent inorganic cation transmembrane transporter activity	31	0.155873	0.0628091	0.150509	0.237649	0.423
alcohol metabolic process	244	0.213039	0.166136	0.210596	0.251557	0.424
RNA transport	52	0.175548	0.101976	0.169732	0.256607	0.424
somatic diversification of immune receptors	27	0.151578	0.0540533	0.144621	0.260315	0.424
ligase activity, forming carbon-oxygen bonds	57	0.178963	0.107044	0.174791	0.253044	0.426
ATP	132	0.202338	0.14213	0.199121	0.260336	0.427
EGF, extracellular	57	0.180349	0.0849417	0.175776	0.250617	0.428
embryonic appendage morphogenesis	54	0.175803	0.0787244	0.171253	0.24627	0.428
steroid hormone receptor activity	47	0.171941	0.087649	0.167181	0.25179	0.428
RNA polymerase II transcription factor activity	65	0.183236	0.110434	0.179223	0.251814	0.429
Variant SH3	46	0.170415	0.083603	0.165	0.243558	0.429
Haloacid dehalogenase-like hydrolase	39	0.165367	0.0765117	0.160208	0.246329	0.429
prenylation	133	0.201512	0.142866	0.198208	0.257086	0.43
Basic helix-loop-helix dimerisation region bHLH	72	0.186274	0.115303	0.18205	0.251689	0.43
microtubule	116	0.198339	0.140766	0.195229	0.260671	0.431
single fertilization	34	0.158495	0.0584093	0.153144	0.247074	0.433
methyltransferase activity	143	0.203323	0.147035	0.200286	0.248229	0.434
protein secretion	31	0.153638	0.0537941	0.148393	0.247847	0.434
GTPase activity	119	0.200847	0.143971	0.197083	0.260726	0.436
vesicle membrane	75	0.186552	0.0991873	0.183225	0.258171	0.436
nucleobase, nucleoside, nucleotide and nucleic acid transport	57	0.178835	0.0996756	0.174355	0.259208	0.436
learning	43	0.16916	0.0757	0.163795	0.245505	0.436
ligase activity, forming aminoacyl-tRNA and related compounds	57	0.178963	0.0907034	0.174749	0.23779	0.437
secondary metabolic process	44	0.167951	0.0981079	0.163795	0.247243	0.437
Kelch	56	0.177868	0.0911348	0.173937	0.23761	0.438
protein import into nucleus	51	0.174064	0.0996321	0.169635	0.25489	0.439
negative regulation of MAP kinase activity	12	0.113575	0.0183673	0.107909	0.232033	0.439
nucleic acid transport	52	0.175548	0.0969669	0.171605	0.252669	0.44
Src homology-3	161	0.205855	0.157484	0.203178	0.255718	0.441
lipid transport	80	0.189833	0.116795	0.186487	0.260508	0.441
nuclear membrane part	60	0.180833	0.106036	0.176928	0.252316	0.442
extracellular matrix structural constituent	55	0.176723	0.0918155	0.172887	0.238273	0.442
protein amino acid autophosphorylation	36	0.161003	0.0620626	0.156207	0.241379	0.442
cellular response to stress	19	0.133019	0.0421894	0.12851	0.228399	0.442
Peptidase M, neutral zinc metallopeptidases, zinc-binding site	75	0.185582	0.123493	0.182694	0.269855	0.443
adherens junction	60	0.179591	0.107478	0.176506	0.251307	0.443
cytoplasmic vesicle membrane	63	0.180436	0.106412	0.176894	0.25556	0.444
tight junction	48	0.17426	0.0860512	0.171317	0.257258	0.444
clathrin coated vesicle membrane	35	0.158483	0.0695711	0.154914	0.241258	0.444
meiotic cell cycle	60	0.179414	0.0921223	0.17609	0.245932	0.445
cytokinesis	29	0.151871	0.0676766	0.147748	0.227528	0.445
protein folding	166	0.206533	0.152175	0.204179	0.250248	0.446
transferase activity, transferring one-carbon groups	146	0.202973	0.144924	0.200846	0.246058	0.446
Cell surface receptor IPT/TIG	28	0.151605	0.0318237	0.14777	0.253759	0.446
sphingoid metabolic process	24	0.142243	0.0477262	0.138231	0.239348	0.446
aromatic amino acid family metabolic process	17	0.129	0.0239711	0.123184	0.247932	0.446
M phase of meiotic cell cycle	60	0.179414	0.0963044	0.175737	0.249625	0.447
metal ion-binding site:Zinc (catalytic)	83	0.190272	0.12282	0.187647	0.245124	0.448
apical part of cell	71	0.183551	0.101443	0.180728	0.267573	0.448
protein autoprocessing	39	0.162839	0.0799895	0.1593	0.269593	0.448
protein methyltransferase activity	32	0.154136	0.0734003	0.151412	0.231626	0.449
Peptidase C1A, papain C-terminal	18	0.132403	0.0336177	0.12695	0.246379	0.449
transition metal ion binding	2089	0.227534	0.209947	0.226855	0.241225	0.45
acid-amino acid ligase activity	91	0.192824	0.116369	0.190399	0.249895	0.451
negative regulation of developmental process	86	0.189793	0.119066	0.187351	0.254664	0.454
ligand-dependent nuclear receptor activity	48	0.171823	0.0951386	0.168403	0.255161	0.455
hydroxylation	52	0.172834	0.0965473	0.170812	0.247179	0.456
regulation of transcription from RNA polymerase II promoter	318	0.215881	0.174104	0.214851	0.255643	0.457
Immunoglobulin subtype 2	143	0.201777	0.145386	0.200262	0.252876	0.458
unfolded protein binding	63	0.17985	0.101267	0.17793	0.251539	0.458
enzyme inhibitor activity	186	0.207351	0.154927	0.20624	0.256426	0.46
SH3 domain	169	0.206117	0.154021	0.204536	0.250027	0.46
protein biosynthesis	121	0.198753	0.136056	0.196808	0.260823	0.46
Protein kinase, core	273	0.213003	0.167122	0.211504	0.247515	0.461
Cadherin, N-terminal	64	0.180639	0.102888	0.178118	0.253802	0.461
embryonic limb morphogenesis	54	0.175803	0.0999205	0.173475	0.24779	0.461
Immunoglobulin	146	0.203089	0.146835	0.201766	0.256399	0.462
Armadillo-like helical	92	0.192076	0.12337	0.190142	0.24719	0.462
oxidoreductase activity, acting on the CH-CH group of donors	39	0.164232	0.0719771	0.161802	0.244095	0.462
establishment of RNA localization	52	0.175548	0.0872856	0.173485	0.259177	0.465
protein amino acid phosphorylation	513	0.220395	0.186318	0.219538	0.248094	0.468
positive regulation of biosynthetic process	46	0.16887	0.0945899	0.166935	0.246594	0.468
ubiquitin-protein ligase activity	76	0.184494	0.113744	0.182849	0.254002	0.469
negative regulation of cell differentiation	71	0.182571	0.103916	0.181071	0.243209	0.471
carboxypeptidase A activity	27	0.146943	0.0540533	0.144621	0.260315	0.471
clathrin coat	36	0.157524	0.0634843	0.155441	0.245841	0.472
regulation of T cell proliferation	33	0.153244	0.0674778	0.150884	0.245084	0.472
biological regulation	3615	0.228427	0.2159	0.22814	0.240844	0.473
lyase activity	147	0.201891	0.147436	0.201001	0.25289	0.473
regulation of action potential	39	0.163923	0.0754837	0.161836	0.242573	0.473
DNA packaging	218	0.210237	0.168365	0.209324	0.251263	0.474
flagellum	33	0.154952	0.0736017	0.152992	0.236458	0.474
cartilage development	43	0.16672	0.0766513	0.164338	0.24486	0.475
acyltransferase activity	154	0.203223	0.145815	0.202048	0.250812	0.476
DNA-directed RNA polymerase II, holoenzyme	40	0.161661	0.0767302	0.160081	0.270781	0.476
Zinc finger, NHR/GATA-type	34	0.155451	0.0734504	0.15362	0.238254	0.476
establishment and/or maintenance of chromatin architecture	211	0.208914	0.16189	0.208142	0.259152	0.477
protein kinase binding	56	0.174299	0.0953474	0.172556	0.253883	0.477
monosaccharide metabolic process	130	0.199244	0.137277	0.19766	0.256769	0.478
leading edge	84	0.187129	0.124323	0.186425	0.261779	0.478
heparin binding	55	0.175726	0.0867648	0.173932	0.244393	0.479
developmental growth	51	0.170808	0.10462	0.169829	0.250762	0.479
GTP-binding	242	0.211421	0.157683	0.210788	0.255816	0.481
negative regulation of transcription from RNA polymerase II promoter	121	0.197708	0.143737	0.196573	0.263139	0.481
negative regulation of signal transduction	85	0.188621	0.0940834	0.187483	0.271725	0.481
transcription factor complex	321	0.215155	0.174583	0.214758	0.254507	0.482
hemopoietic or lymphoid organ development	204	0.208146	0.159607	0.207702	0.251975	0.482
dna recombination	25	0.143581	0.0488221	0.142366	0.245767	0.483
regulation of transferase activity	137	0.20045	0.138789	0.199743	0.258157	0.484
glycoprotein biosynthetic process	67	0.180869	0.10552	0.179988	0.258826	0.484
golgi apparatus	361	0.215795	0.180586	0.21534	0.260665	0.485
IGc2	149	0.202982	0.149705	0.202317	0.254721	0.485
kinase regulator activity	74	0.18335	0.116467	0.182826	0.259766	0.486
memory	16	0.122917	0.0182628	0.121902	0.227788	0.486
skeletal development	147	0.202961	0.141366	0.202428	0.260202	0.488
sterol metabolic process	67	0.179575	0.113377	0.178617	0.252405	0.488
endocrine system development	40	0.162176	0.0649142	0.161141	0.245609	0.488
negative regulation of transcription	226	0.210009	0.161629	0.209518	0.255743	0.489
cytosolic part	89	0.188964	0.124212	0.188302	0.265312	0.489
Peptidase, cysteine peptidase active site	38	0.159813	0.0771412	0.158658	0.251064	0.489
chromosomal part	218	0.208886	0.158828	0.208611	0.258734	0.491
hexose metabolic process	128	0.198944	0.14451	0.198571	0.252983	0.491
small protein conjugating enzyme activity	77	0.184422	0.117763	0.184121	0.263505	0.491
histone methyltransferase activity	22	0.136619	0.0493067	0.135899	0.258382	0.492
lymphocyte differentiation	88	0.188764	0.115325	0.188588	0.260877	0.493
neurotransmitter receptor	35	0.154998	0.0677429	0.154609	0.2382	0.493
ribosome biogenesis	30	0.14819	0.0691493	0.147936	0.241452	0.493
mitogen	27	0.146835	0.0598326	0.146292	0.249277	0.493
negative regulation of cellular process	774	0.223086	0.191755	0.223019	0.249627	0.494
DNA metabolic process	530	0.219816	0.185655	0.219681	0.254163	0.494
protein amino acid glycosylation	58	0.173956	0.10646	0.17354	0.250176	0.494
protein modification process	1273	0.225323	0.204319	0.225229	0.243951	0.495
hydrolase activity, acting on ester bonds	566	0.220695	0.189635	0.220628	0.2522	0.497
regulation of cell adhesion	41	0.163172	0.0691388	0.163154	0.241211	0.5
cytosol	348	0.215489	0.181735	0.215493	0.265133	0.501
early endosome	28	0.146022	0.0616638	0.14667	0.245478	0.501
coated vesicle	89	0.188532	0.120945	0.188568	0.250721	0.502
protein ubiquitination	41	0.162113	0.0760696	0.162248	0.256525	0.502
anatomical structure formation	159	0.201204	0.155886	0.20138	0.256933	0.503
ribonucleotide binding	1430	0.225988	0.207904	0.226102	0.243855	0.504
amino acid biosynthetic process	39	0.158263	0.0898655	0.158773	0.244627	0.505
response to oxidative stress	48	0.170464	0.0860512	0.171317	0.257258	0.506
extracellular matrix part	80	0.185116	0.113138	0.185408	0.264082	0.507
regulation of pH	23	0.135498	0.044497	0.136669	0.251984	0.507
amino acid metabolic process	217	0.208637	0.169964	0.208858	0.248992	0.508
response to DNA damage stimulus	213	0.208264	0.164264	0.208594	0.260106	0.508
protein processing	73	0.182182	0.103859	0.182671	0.254679	0.508
purine ribonucleotide binding	1430	0.225988	0.201665	0.226131	0.247589	0.509
ATP binding	1142	0.224844	0.195079	0.225119	0.243326	0.512
carbohydrate metabolic process	368	0.215918	0.183485	0.216435	0.248535	0.512
Cyclin-like F-box	58	0.17487	0.104987	0.175631	0.253947	0.512
carboxylic acid metabolic process	436	0.21776	0.185384	0.21808	0.254262	0.513
angiogenesis	116	0.195977	0.14123	0.19675	0.26452	0.513
biomineral formation	78	0.183258	0.0998446	0.183737	0.247822	0.513
cellular component disassembly	23	0.13777	0.0508437	0.138355	0.244404	0.513
neuron apoptosis	44	0.164825	0.0777404	0.165879	0.239443	0.515
phosphoinositide metabolic process	46	0.164146	0.083603	0.165	0.243558	0.515
metal cluster binding	41	0.160717	0.0763979	0.161526	0.243855	0.515
notch signaling pathway	32	0.151473	0.0437827	0.152176	0.236164	0.515
integral to endoplasmic reticulum membrane	29	0.147216	0.0637775	0.148296	0.246987	0.516
BMP signaling pathway	27	0.144108	0.0634791	0.145105	0.246948	0.517
fertilization	38	0.157276	0.0771412	0.158658	0.251064	0.518
extracellular matrix structural constituent conferring tensile strength	27	0.145065	0.0598326	0.146292	0.249277	0.518
immune system development	216	0.209301	0.15882	0.209892	0.256815	0.52
iron-sulfur cluster binding	41	0.160717	0.0637125	0.161863	0.245484	0.52
trans-Golgi network	38	0.158503	0.0652449	0.159848	0.252633	0.521
transaminase activity	29	0.148261	0.0517487	0.149454	0.252607	0.522
thiol protease	96	0.189084	0.133183	0.190368	0.260168	0.524
N-acyltransferase activity	55	0.170662	0.108242	0.171879	0.24698	0.525
Golgi-associated vesicle membrane	26	0.141648	0.0253542	0.143563	0.247156	0.525
phosphotransferase activity, alcohol group as acceptor	589	0.220491	0.190574	0.221047	0.251171	0.526
endoplasmic reticulum	598	0.220308	0.18901	0.220925	0.247044	0.526
positive regulation of transcription from RNA polymerase II promoter	171	0.204382	0.150722	0.205654	0.261229	0.526
post-translational protein modification	1115	0.224233	0.205373	0.224685	0.246151	0.528
cytoplasmic vesicle part	67	0.178704	0.10784	0.179769	0.251526	0.528
positive regulation of T cell activation	35	0.154297	0.0760052	0.156035	0.23389	0.53
protein tyrosine/serine/threonine phosphatase activity	33	0.149273	0.0561698	0.151872	0.240704	0.53
Winged helix repressor DNA-binding	100	0.190804	0.133934	0.192037	0.254532	0.531
bone remodeling	84	0.186411	0.124008	0.18788	0.263595	0.531
transferase activity, transferring nitrogenous groups	32	0.149738	0.0648466	0.152395	0.237178	0.531
aminopeptidase	23	0.13648	0.0538305	0.139191	0.234628	0.532
protein localization	650	0.22108	0.191218	0.221819	0.249428	0.534
iron ion binding	263	0.21013	0.174298	0.21132	0.253727	0.534
transferase activity, transferring groups other than amino-acyl groups	156	0.201323	0.15061	0.203005	0.254642	0.534
mediator complex	15	0.11488	0.0217489	0.117731	0.230268	0.534
nuclear envelope	106	0.192354	0.134143	0.194117	0.250203	0.535
oxygen and reactive oxygen species metabolic process	34	0.151418	0.0670149	0.154507	0.236013	0.536
intracellular transport	538	0.219001	0.190463	0.220108	0.247864	0.537
MAPKKK cascade	109	0.191935	0.137082	0.193802	0.260905	0.537
mitochondrial lumen	59	0.171876	0.106089	0.173881	0.252178	0.538
organic acid metabolic process	437	0.21719	0.189562	0.218125	0.249935	0.54
DNA repair	176	0.203694	0.154014	0.205044	0.250823	0.54
Ubl conjugation pathway	286	0.212706	0.170144	0.213834	0.253285	0.541
amino sugar metabolic process	28	0.143068	0.0516671	0.146381	0.241206	0.541
ligase	179	0.20372	0.153736	0.205391	0.251271	0.542
chromosome segregation	48	0.165044	0.0858476	0.167505	0.258217	0.542
spindle	46	0.164312	0.0842552	0.167469	0.247658	0.543
negative regulation of nucleobase, nucleoside, nucleotide and nucleic acid metabolic process	241	0.209025	0.165916	0.210427	0.257038	0.544
cellular component assembly	333	0.214198	0.175492	0.215846	0.257878	0.545
ATPase activity	294	0.211814	0.174898	0.213223	0.255212	0.545
ceramide metabolic process	23	0.134978	0.0478923	0.138813	0.24412	0.547
mitotic cell cycle	211	0.206133	0.157318	0.208187	0.253085	0.552
cell cycle arrest	51	0.168098	0.0908287	0.170674	0.250056	0.552
DNA damage	124	0.195241	0.139633	0.197956	0.257818	0.553
mitochondrial matrix	59	0.171876	0.10548	0.17564	0.259193	0.554
Phospholipid biosynthesis	26	0.136338	0.0468013	0.141572	0.247918	0.555
chromatin remodeling	37	0.155132	0.0708025	0.158428	0.23681	0.556
microtubule binding	49	0.167904	0.0858807	0.17191	0.257326	0.557
iron-sulfur	34	0.150823	0.0557231	0.154548	0.236953	0.557
biopolymer modification	1328	0.22457	0.204515	0.225557	0.243787	0.558
active transmembrane transporter activity	319	0.212697	0.181503	0.214155	0.251696	0.558
kinase activity	741	0.220937	0.191421	0.222147	0.249557	0.559
cell cycle phase	244	0.208947	0.171109	0.210445	0.24822	0.56
Adenylyl cyclase class-3/4/guanylyl cyclase	19	0.12544	0.0391541	0.129453	0.236743	0.56
protein modification by small protein conjugation	45	0.161474	0.0937343	0.165943	0.260888	0.565
transition metal ion transmembrane transporter activity	23	0.131823	0.0327359	0.138088	0.264452	0.565
transferase activity	1503	0.22499	0.207331	0.226116	0.245048	0.566
macromolecule localization	673	0.220179	0.196971	0.221682	0.248269	0.566
transcription factor activity	692	0.221166	0.195413	0.222464	0.252903	0.567
protein complex assembly	151	0.199799	0.142798	0.202693	0.250153	0.567
response to endogenous stimulus	237	0.208565	0.161023	0.210612	0.2558	0.568
N-acetyltransferase activity	45	0.161236	0.093958	0.166139	0.245934	0.57
duplication	87	0.184802	0.116312	0.188336	0.249629	0.571
transferase activity, transferring phosphorus-containing groups	859	0.222004	0.18882	0.223511	0.247705	0.572
Ubiquitin-associated/translation elongation factor EF1B, N-terminal	27	0.13991	0.0634791	0.145105	0.246948	0.572
protein heterodimerization activity	68	0.175205	0.0962508	0.179564	0.249727	0.574
regulation of cell shape	44	0.159648	0.0891175	0.165225	0.237315	0.575
cell activation	193	0.203113	0.16108	0.206584	0.259824	0.578
regulation of anatomical structure morphogenesis	44	0.159648	0.0880561	0.16505	0.259386	0.581
polyol metabolic process	23	0.130057	0.0531304	0.136892	0.260058	0.581
transcription factor binding	195	0.204331	0.146309	0.207121	0.260913	0.582
ABC transporter, transmembrane region, type 1	22	0.126947	0.027917	0.13417	0.242203	0.587
polysaccharide metabolic process	49	0.161331	0.0880324	0.167826	0.249035	0.588
collagen	34	0.146462	0.0584093	0.153144	0.247074	0.591
intracellular receptor-mediated signaling pathway	28	0.13889	0.0256813	0.146018	0.252322	0.591
ER-nuclear signaling pathway	21	0.125315	0.0210446	0.134057	0.253054	0.592
kelch repeat	42	0.15848	0.0728545	0.16523	0.255167	0.595
lipid raft	37	0.151248	0.0775191	0.158591	0.249837	0.595
Kelch repeat type 1	42	0.158231	0.0728545	0.16523	0.255167	0.596
ubiquitin cycle	371	0.213532	0.176892	0.216167	0.255282	0.597
lipid metabolism	93	0.186147	0.124033	0.19135	0.258176	0.597
carboxypeptidase activity	44	0.156889	0.0751231	0.165361	0.245869	0.602
EF-Hand type	145	0.195798	0.138836	0.200919	0.259493	0.603
tissue remodeling	99	0.186536	0.131254	0.192629	0.252758	0.603
microbody	79	0.17885	0.115566	0.18426	0.253259	0.603
transport vesicle	39	0.152842	0.0720666	0.158918	0.243138	0.603
Fatty acid metabolism	44	0.157696	0.0686449	0.164817	0.26123	0.604
DNA repair	116	0.191964	0.125215	0.196436	0.265265	0.605
small conjugating protein ligase activity	82	0.180854	0.12488	0.18668	0.260143	0.607
biopolymer glycosylation	60	0.169412	0.097225	0.17541	0.244898	0.608
mesoderm development	39	0.150924	0.0898655	0.158773	0.244627	0.608
peroxisome	79	0.17885	0.117418	0.184932	0.265338	0.609
carbohydrate transport	60	0.167346	0.101445	0.175021	0.256651	0.609
regulation of cell morphogenesis	44	0.159648	0.0718871	0.167764	0.254654	0.61
Basic-leucine zipper (bZIP) transcription factor	41	0.155651	0.0717918	0.163953	0.258086	0.61
transferase activity, transferring acyl groups	163	0.198711	0.144804	0.202957	0.260065	0.611
phosphorylation	595	0.218271	0.191054	0.220792	0.253628	0.612
T cell differentiation	59	0.169042	0.104338	0.176733	0.254993	0.612
protein import	58	0.168045	0.10646	0.17354	0.250176	0.613
transferase	1066	0.222419	0.205962	0.224407	0.246388	0.614
morphogenesis of embryonic epithelium	48	0.160703	0.0972307	0.166889	0.24515	0.616
ER to Golgi vesicle-mediated transport	48	0.158379	0.0887564	0.167218	0.245179	0.616
dna-binding	1012	0.222811	0.199491	0.224823	0.249114	0.617
Serine/threonine protein kinase, active site	208	0.203686	0.161156	0.208375	0.251771	0.617
nuclear lumen	573	0.217399	0.186811	0.220005	0.247673	0.618
regulation of T cell activation	57	0.167405	0.100636	0.174608	0.252655	0.618
positive regulation of cellular biosynthetic process	36	0.14768	0.0506149	0.155527	0.258959	0.619
steroid hormone receptor signaling pathway	23	0.127536	0.0538305	0.139191	0.234628	0.619
regulation of kinase activity	131	0.194659	0.140919	0.200141	0.250371	0.62
in utero embryonic development	100	0.186078	0.115524	0.192639	0.274105	0.62
kinase	589	0.218182	0.19004	0.220758	0.259993	0.621
GTP binding	294	0.209618	0.170166	0.213399	0.258211	0.621
membrane lipid biosynthetic process	68	0.173121	0.101716	0.179794	0.244807	0.625
regulation of mitosis	37	0.149369	0.0415773	0.159166	0.247183	0.627
cellular polysaccharide metabolic process	49	0.161331	0.0916487	0.168726	0.251778	0.628
nucleotide binding	1696	0.2246	0.209624	0.226451	0.242534	0.629
ligase activity, forming carbon-nitrogen bonds	123	0.19201	0.129628	0.198291	0.258483	0.63
glutamine metabolic process	17	0.112754	0.0212691	0.124211	0.228454	0.631
lymphocyte activation	166	0.198627	0.152478	0.2038	0.255546	0.632
vitamin binding	98	0.185887	0.130329	0.193041	0.246909	0.632
positive regulation of cell proliferation	152	0.197674	0.154298	0.202329	0.258672	0.633
active site:Proton acceptor	399	0.213159	0.185773	0.217057	0.250387	0.634
ossification	77	0.175599	0.113964	0.183182	0.253301	0.634
Regulator of G protein signalling	33	0.143589	0.0718417	0.153917	0.250751	0.636
guanyl nucleotide binding	302	0.209431	0.169874	0.21381	0.254113	0.637
regulation of MAP kinase activity	46	0.155925	0.0843579	0.165275	0.244428	0.637
nucleoside-triphosphatase activity	458	0.215537	0.187099	0.218693	0.25387	0.638
endoplasmic reticulum	429	0.21411	0.186816	0.218013	0.255609	0.638
transferase activity, transferring hexosyl groups	129	0.19308	0.145249	0.199149	0.256669	0.639
nucleotide-excision repair	22	0.125614	0.0522275	0.135993	0.239111	0.639
heterocycle metabolic process	65	0.169791	0.094954	0.177533	0.256866	0.64
Marvel	20	0.120237	0.0459909	0.132443	0.250492	0.64
synaptic vesicle transport	20	0.120148	0.0351741	0.13199	0.231462	0.64
M phase	205	0.202253	0.165565	0.207951	0.250268	0.644
nuclear envelope-endoplasmic reticulum network	90	0.181379	0.130556	0.189012	0.252693	0.644
metallocarboxypeptidase activity	31	0.141007	0.0713326	0.15076	0.256211	0.644
guanyl ribonucleotide binding	301	0.209775	0.177891	0.214314	0.258145	0.645
Golgi membrane	76	0.174822	0.10031	0.183309	0.250809	0.645
lipid catabolic process	102	0.184169	0.130369	0.192325	0.258012	0.648
T cell differentiation in the thymus	22	0.122108	0.027822	0.135729	0.249078	0.649
peptidyl-amino acid modification	100	0.185096	0.126185	0.192568	0.247948	0.65
structural protein	83	0.178783	0.122628	0.187114	0.263158	0.652
sphingolipid metabolic process	41	0.150602	0.0654361	0.162201	0.242994	0.652
Golgi apparatus	505	0.215519	0.186212	0.2196	0.248638	0.655
protein serine/threonine kinase activity	399	0.212133	0.174706	0.216757	0.251749	0.656
endoplasmic reticulum membrane	86	0.178638	0.1177	0.186446	0.255119	0.656
lipoprotein biosynthetic process	52	0.161052	0.10334	0.170672	0.253387	0.657
cytoskeleton	256	0.205364	0.166582	0.211014	0.272034	0.658
positive regulation of transcription, DNA-dependent	217	0.201923	0.160591	0.207764	0.256818	0.658
fatty acid metabolic process	143	0.194295	0.139859	0.201228	0.259567	0.658
acetyltransferase activity	56	0.164384	0.0966088	0.174069	0.245066	0.658
protein targeting	186	0.199345	0.157355	0.20556	0.257199	0.659
RNA splicing, via transesterification reactions	47	0.155713	0.0969975	0.167536	0.259269	0.659
ADP-ribosylation factor	21	0.12169	0.0407119	0.134236	0.227677	0.659
domain:EF-hand 2	101	0.184421	0.122311	0.193304	0.254971	0.66
intrinsic to endoplasmic reticulum membrane	35	0.143259	0.0555959	0.156047	0.249148	0.66
hydrolase	1155	0.222449	0.195641	0.225034	0.243922	0.661
ATPase activity, coupled	248	0.205902	0.171872	0.210977	0.247581	0.661
gene silencing	30	0.139146	0.0553482	0.151507	0.252302	0.661
mesoderm formation	22	0.120924	0.0325249	0.134565	0.266987	0.661
transcription from RNA polymerase II promoter	353	0.210648	0.173195	0.215432	0.253134	0.662
negative regulation of apoptosis	146	0.192856	0.144503	0.200401	0.258586	0.662
zinc finger	63	0.168806	0.0895871	0.17818	0.2533	0.664
SET	37	0.145423	0.0684323	0.157432	0.247612	0.666
endosome	91	0.180467	0.0996859	0.189713	0.271575	0.667
short sequence motif:Nuclear localization signal	164	0.197014	0.152782	0.204059	0.261498	0.668
response to stress	658	0.218282	0.192102	0.221897	0.249413	0.67
Sema	30	0.13554	0.0319389	0.147855	0.253023	0.67
regulation of cellular biosynthetic process	134	0.192263	0.143547	0.199874	0.263823	0.671
formation of primary germ layer	24	0.126373	0.0461786	0.139002	0.243982	0.671
bZIP transcription factor, bZIP-1	20	0.115555	0.0281084	0.130379	0.234341	0.671
nuclear mRNA splicing, via spliceosome	47	0.155713	0.0950302	0.167786	0.247088	0.677
mesoderm morphogenesis	22	0.120924	0.015739	0.13495	0.247032	0.677
generation of precursor metabolites and energy	430	0.212025	0.190476	0.217574	0.256639	0.678
RNA splicing, via transesterification reactions with bulged adenosine as nucleophile	47	0.155713	0.0797358	0.168314	0.254266	0.679
Wnt signaling pathway	136	0.190797	0.143439	0.199019	0.245793	0.68
negative regulation of programmed cell death	149	0.193305	0.145516	0.202283	0.256129	0.681
regulation of protein kinase activity	125	0.187766	0.134138	0.196607	0.259093	0.681
fatty acid biosynthesis	38	0.14623	0.0750455	0.160635	0.241571	0.681
Semaphorin/CD100 antigen	30	0.13554	0.0627882	0.149207	0.253886	0.681
Transforming growth factor beta	31	0.135152	0.0612719	0.148099	0.246529	0.681
NUDIX hydrolase, core	21	0.119724	0.0448518	0.134892	0.250675	0.681
glycerophospholipid metabolic process	63	0.165677	0.103117	0.177316	0.255999	0.682
phospholipase A2 activity	25	0.125219	0.0572213	0.139865	0.229528	0.682
glycosyltransferase	136	0.19116	0.143223	0.199831	0.250302	0.683
somitogenesis	28	0.130138	0.0462258	0.14579	0.234084	0.683
lipid synthesis	79	0.176413	0.121904	0.185831	0.247692	0.684
AAA ATPase, core	36	0.143167	0.0727583	0.155761	0.241986	0.684
hydrolase activity, acting on acid anhydrides	487	0.213839	0.187738	0.218824	0.248252	0.685
growth factor	103	0.18483	0.131214	0.194328	0.247475	0.685
morphogenesis of an epithelium	91	0.177995	0.113707	0.187368	0.260759	0.685
cytokine and chemokine mediated signaling pathway	40	0.147782	0.0786495	0.160823	0.246121	0.686
protein transporter activity	116	0.187619	0.12653	0.19691	0.256101	0.687
gastrulation	49	0.157111	0.0929972	0.168022	0.251022	0.687
establishment of protein localization	596	0.216171	0.196271	0.221059	0.247446	0.688
nucleotide-binding	1126	0.221679	0.195075	0.224851	0.2484	0.69
steroid metabolic process	119	0.187511	0.135397	0.196684	0.252589	0.69
Cyclin	30	0.136322	0.0347907	0.149528	0.251765	0.69
Calcium-binding EF-hand	166	0.195492	0.145695	0.203682	0.259462	0.691
endosome	151	0.19316	0.146379	0.202227	0.258781	0.691
protein complex binding	50	0.156099	0.0834468	0.16885	0.252065	0.691
trans-Golgi network transport vesicle	24	0.124752	0.0461114	0.139512	0.238267	0.691
domain:EF-hand 1	101	0.180063	0.129165	0.190153	0.259432	0.692
nucleotide phosphate-binding region:ATP	516	0.214988	0.190778	0.220003	0.250576	0.694
phospholipid metabolic process	125	0.187688	0.140678	0.197106	0.252048	0.695
endoplasmic reticulum part	95	0.179801	0.129081	0.189984	0.252443	0.695
heparin-binding	44	0.152321	0.0777404	0.165879	0.239443	0.695
M phase of mitotic cell cycle	160	0.194917	0.145146	0.203972	0.256477	0.696
membrane lipid metabolic process	155	0.194156	0.149673	0.202186	0.254086	0.696
carbohydrate biosynthetic process	85	0.176418	0.128886	0.188243	0.24546	0.696
positive regulation of lymphocyte proliferation	26	0.12621	0.0468013	0.141572	0.247918	0.696
cell-substrate adhesion	59	0.161749	0.105917	0.174669	0.241243	0.697
protein amino acid lipidation	49	0.154536	0.0854803	0.167724	0.257133	0.697
actin polymerization and/or depolymerization	39	0.146578	0.0850589	0.159083	0.249581	0.698
mitotic sister chromatid segregation	23	0.119248	0.0531304	0.136892	0.260058	0.7
protein dimerization activity	223	0.202188	0.160028	0.20938	0.25339	0.701
mitosis	159	0.194762	0.143911	0.203576	0.256815	0.701
PIRSF002406:vertebrate rhodopsin	62	0.165271	0.105925	0.177906	0.254432	0.701
CYCLIN	32	0.138173	0.0692255	0.15187	0.252548	0.701
apoptotic mitochondrial changes	18	0.109335	0.0261432	0.127919	0.227092	0.701
carbon-oxygen lyase activity	57	0.161471	0.0996756	0.174355	0.259208	0.702
Plexin	28	0.130678	0.0549254	0.146142	0.255617	0.702
transcription coactivator activity	69	0.16776	0.116615	0.179839	0.253589	0.704
cell-substrate adherens junction	30	0.133254	0.0458068	0.1496	0.233116	0.704
positive regulation of mononuclear cell proliferation	26	0.12621	0.0237393	0.141995	0.251615	0.704
cellular biosynthetic process	795	0.218485	0.190771	0.223112	0.248754	0.706
EFh	177	0.195239	0.152465	0.204511	0.253647	0.706
oxidoreductase activity, acting on the CH-NH group of donors	24	0.12227	0.0134503	0.139338	0.248534	0.707
acyltransferase	119	0.186796	0.129754	0.197783	0.258998	0.709
4 iron, 4 sulfur cluster binding	18	0.106838	0.0139501	0.126037	0.252131	0.71
oxidoreductase activity, acting on paired donors, with incorporation or reduction of molecular oxygen, 2-oxoglutarate as one donor, and incorporation of one atom each of oxygen into both donors	28	0.131268	0.057545	0.145855	0.240177	0.711
hydrolase activity	1887	0.22385	0.210172	0.226842	0.242848	0.714
ligase activity	271	0.205231	0.172013	0.212602	0.251142	0.715
trans-Golgi network transport vesicle membrane	19	0.110337	0.0391541	0.129453	0.236743	0.715
cytokine production	82	0.17408	0.124493	0.186067	0.262295	0.716
identical protein binding	238	0.202572	0.168988	0.209986	0.250928	0.718
phospholipid biosynthetic process	60	0.161773	0.114047	0.175527	0.262431	0.718
acetylglucosaminyltransferase activity	31	0.134588	0.0592508	0.149624	0.273175	0.718
hydrolase activity, acting on acid anhydrides, in phosphorus-containing anhydrides	486	0.213567	0.187013	0.219382	0.2516	0.72
cholesterol biosynthetic process	22	0.118887	0.0176257	0.136017	0.224733	0.721
protein kinase cascade	229	0.201791	0.158917	0.209878	0.257441	0.723
Tumour necrosis factor-like	29	0.128804	0.0520273	0.146314	0.257439	0.724
lipoprotein metabolic process	69	0.167506	0.101464	0.180051	0.251081	0.726
S-adenosylmethionine-dependent methyltransferase activity	62	0.163634	0.0988232	0.177389	0.246894	0.726
cell-matrix adhesion	57	0.159427	0.0996756	0.174355	0.259208	0.726
atp-binding	871	0.218666	0.198012	0.222842	0.247409	0.727
regulation of body fluid levels	68	0.166858	0.101708	0.180573	0.249396	0.727
protein transport	565	0.214475	0.187187	0.220101	0.25246	0.728
pyrophosphatase activity	481	0.212877	0.183626	0.21928	0.25087	0.728
endomembrane system	317	0.207092	0.176913	0.214563	0.248907	0.728
dendrite development	36	0.138491	0.0707744	0.157362	0.250395	0.729
regulation of cyclin-dependent protein kinase activity	16	0.100325	0.0297062	0.121069	0.244691	0.729
regulation of cytokine biosynthetic process	43	0.145961	0.081953	0.162401	0.23609	0.734
nuclear part	844	0.219081	0.193891	0.22336	0.249621	0.735
regulation of cell activation	71	0.167119	0.103846	0.181346	0.265006	0.735
hydro-lyase activity	48	0.152386	0.0976738	0.168734	0.257086	0.737
macromolecular complex assembly	293	0.205713	0.173271	0.213608	0.255537	0.739
angiogenesis	32	0.135496	0.0345785	0.153446	0.253611	0.739
G protein-coupled receptor	42	0.146605	0.0930665	0.162271	0.243072	0.74
alpha-beta T cell activation	29	0.130422	0.0467896	0.148854	0.240644	0.74
sister chromatid segregation	24	0.119915	0.0557772	0.140434	0.248249	0.74
magnesium ion binding	322	0.206551	0.179493	0.214072	0.253329	0.741
Nucleotide-binding, alpha-beta plait	130	0.188242	0.140843	0.199813	0.247975	0.741
peroxisome	73	0.16699	0.101184	0.181704	0.268089	0.741
Allosteric enzyme	27	0.123867	0.0389138	0.14409	0.239765	0.741
protein amino acid alkylation	27	0.12348	0.0484934	0.143133	0.240536	0.742
regulation of lymphocyte proliferation	41	0.14358	0.0637125	0.161863	0.245484	0.743
regulation of biosynthetic process	150	0.192078	0.148446	0.202186	0.253981	0.745
Golgi-associated vesicle	46	0.149476	0.0945899	0.166935	0.246594	0.745
polysaccharide biosynthetic process	22	0.1145	0.0465476	0.136284	0.242851	0.746
basolateral plasma membrane	65	0.16345	0.104268	0.178625	0.253637	0.747
intrinsic to Golgi membrane	15	0.0951047	0.0319097	0.117706	0.244418	0.747
positive regulation of lymphocyte activation	44	0.146334	0.0634124	0.163052	0.265778	0.748
leukocyte activation	177	0.19371	0.157276	0.204212	0.258195	0.752
P-loop	69	0.164257	0.0967475	0.180132	0.260441	0.752
Zinc finger, RING-type	180	0.194777	0.148383	0.205246	0.26164	0.753
regulation of mononuclear cell proliferation	41	0.14358	0.0792931	0.162382	0.254457	0.753
cellular polysaccharide biosynthetic process	21	0.112802	0.0196556	0.13418	0.222738	0.754
magnesium	284	0.203696	0.173892	0.212776	0.262232	0.757
tissue morphogenesis	52	0.153456	0.092101	0.171398	0.242623	0.757
positive regulation of biological process	807	0.217871	0.196991	0.22385	0.246855	0.758
regulation of lymphocyte activation	69	0.165808	0.113186	0.180917	0.247667	0.76
B cell differentiation	33	0.13268	0.0742506	0.152051	0.24198	0.761
nucleoplasm	458	0.210856	0.180969	0.218531	0.251701	0.762
chaperone	96	0.176174	0.116706	0.19184	0.25082	0.762
cell-matrix junction	34	0.133743	0.067438	0.154232	0.242906	0.763
oxidoreductase activity	732	0.216507	0.19128	0.222272	0.247833	0.764
Plexin/semaphorin/integrin	42	0.144688	0.0778109	0.162587	0.24419	0.766
PSI	42	0.144688	0.0930665	0.162271	0.243072	0.766
RNA processing	328	0.206247	0.172277	0.214857	0.247234	0.768
extrinsic to plasma membrane	45	0.146165	0.0729951	0.165668	0.263289	0.769
positive regulation of translation	32	0.129797	0.0648466	0.152395	0.237178	0.769
protein amino acid methylation	27	0.12348	0.0285416	0.144896	0.250269	0.769
catalytic activity	4441	0.226187	0.218369	0.22851	0.239203	0.771
metal-binding	1872	0.223154	0.209566	0.226863	0.241468	0.772
ubiquitin-dependent protein catabolic process	104	0.177722	0.117984	0.192879	0.258441	0.772
sterol biosynthetic process	29	0.127206	0.0324077	0.149127	0.252804	0.772
modification-dependent protein catabolic process	105	0.176925	0.132935	0.19183	0.25492	0.773
nucleotide binding	68	0.163394	0.111937	0.179591	0.265003	0.773
sushi	31	0.130393	0.033758	0.151427	0.253081	0.773
pattern specification process	195	0.195291	0.149606	0.206992	0.25482	0.775
transcription corepressor activity	50	0.151963	0.0853307	0.172183	0.258276	0.775
regulation of actin filament length	31	0.127783	0.0792315	0.150611	0.229916	0.775
translation regulator activity	113	0.181165	0.134879	0.196967	0.250538	0.776
trna processing	29	0.12363	0.0519154	0.146964	0.233691	0.776
blastocyst development	28	0.12322	0.0616638	0.14667	0.245478	0.776
membrane-enclosed lumen	655	0.215372	0.192036	0.222001	0.249295	0.777
Cyclin-related	31	0.130043	0.033758	0.151427	0.253081	0.777
Sushi/SCR/CCP	37	0.136927	0.0723704	0.158153	0.249907	0.778
translation	390	0.207578	0.182022	0.216423	0.259308	0.779
membrane organization and biogenesis	217	0.197753	0.161296	0.208939	0.25171	0.779
inflammatory response	171	0.192397	0.154627	0.204318	0.255373	0.779
organelle lumen	655	0.215372	0.195623	0.222129	0.248735	0.78
PMP-22/EMP/MP20/Claudin	36	0.134854	0.0688096	0.156148	0.251169	0.78
translation factor activity, nucleic acid binding	107	0.178943	0.136361	0.194506	0.262569	0.781
chromatin modification	159	0.19027	0.151896	0.20343	0.253673	0.784
Transforming growth factor-beta-related	27	0.121364	0.0555956	0.144868	0.245366	0.784
Transcription	1030	0.219367	0.198134	0.224745	0.246115	0.785
Golgi apparatus part	135	0.184043	0.145668	0.198629	0.253441	0.785
Tudor	13	0.0834598	0.00687691	0.111851	0.217173	0.785
protein-RNA complex assembly	77	0.166795	0.116035	0.183555	0.263571	0.786
regulation of actin cytoskeleton organization and biogenesis	31	0.127783	0.0642843	0.151055	0.231279	0.786
Transcription regulation	1004	0.218772	0.198993	0.224286	0.25029	0.787
Toll-Interleukin receptor	11	0.0730506	0.00615977	0.103846	0.205183	0.787
positive regulation of nucleobase, nucleoside, nucleotide and nucleic acid metabolic process	271	0.201425	0.172669	0.212299	0.256141	0.788
mRNA metabolic process	224	0.197877	0.16962	0.209541	0.250122	0.788
Serine/threonine-protein kinase	289	0.203391	0.170841	0.213443	0.253125	0.789
repressor	237	0.199443	0.167201	0.210066	0.256533	0.789
isomerase activity	132	0.18436	0.143016	0.199462	0.25226	0.789
negative regulation of progression through cell cycle	123	0.183574	0.143488	0.197602	0.259725	0.789
mRNA processing	199	0.195154	0.15839	0.207771	0.258142	0.79
cell	10511	0.228111	0.223992	0.229373	0.236227	0.791
mitochondrion organization and biogenesis	63	0.158068	0.0897689	0.176846	0.26005	0.791
cell part	10511	0.228111	0.22446	0.22957	0.234085	0.792
wound healing	78	0.168029	0.123015	0.184955	0.250744	0.793
positive regulation of I-kappaB kinase/NF-kappaB cascade	32	0.127916	0.0620088	0.150754	0.273914	0.793
transferase activity, transferring glycosyl groups	182	0.193017	0.155087	0.205762	0.259546	0.794
isomerase	99	0.173823	0.1256	0.189414	0.259597	0.794
cytokine binding	74	0.163055	0.117225	0.182378	0.265432	0.794
Cell cycle	103	0.176037	0.133731	0.193451	0.263206	0.795
perinuclear region of cytoplasm	45	0.141982	0.0824842	0.166096	0.245047	0.797
regulation of actin polymerization and/or depolymerization	30	0.126954	0.0650897	0.148578	0.253436	0.797
nucleoplasm part	429	0.207583	0.184894	0.217566	0.249942	0.798
negative regulation of kinase activity	34	0.129954	0.067438	0.154232	0.242906	0.798
Exonuclease	30	0.122921	0.069943	0.149738	0.235402	0.798
Cyclin, N-terminal	25	0.115987	0.0480202	0.140602	0.237612	0.798
negative regulation of transferase activity	36	0.132319	0.0579469	0.156579	0.249562	0.799
regulation of cellular component size	32	0.129499	0.0692255	0.15187	0.252548	0.799
organelle part	1993	0.22262	0.211968	0.226935	0.245326	0.8
Thioredoxin domain	8	0.0578384	-0.00631191	0.0877146	0.203176	0.8
vesicle coat	47	0.146015	0.0997763	0.166562	0.250111	0.801
er-golgi transport	52	0.14882	0.0776236	0.170325	0.247374	0.802
heat shock protein binding	52	0.150243	0.0847446	0.172676	0.242113	0.803
negative regulation of protein kinase activity	34	0.129954	0.0719724	0.155101	0.248663	0.803
cell division	211	0.195876	0.159246	0.209418	0.250677	0.806
aromatic compound metabolic process	105	0.176115	0.133865	0.194219	0.257831	0.806
anti-oncogene	56	0.150469	0.0806056	0.173866	0.255093	0.806
Collagen triple helix repeat	68	0.161347	0.107575	0.180738	0.266447	0.807
Bromodomain	28	0.12129	0.0614016	0.148518	0.250855	0.807
protein histidine kinase activity	22	0.107318	0.0501041	0.134172	0.231124	0.807
vesicle-mediated transport	361	0.205981	0.18197	0.216149	0.249858	0.809
T cell activation	109	0.175839	0.137082	0.193802	0.260905	0.809
phosphoprotein	3362	0.224612	0.21757	0.228092	0.240601	0.81
regulation of organelle organization and biogenesis	33	0.126718	0.0736017	0.152992	0.236458	0.812
centromere	31	0.123795	0.0691996	0.149208	0.24265	0.813
transcription regulator activity	975	0.217715	0.192612	0.223855	0.251791	0.815
growth factor activity	135	0.184406	0.149639	0.199883	0.256606	0.815
intracellular organelle part	1984	0.222445	0.210228	0.226735	0.242317	0.816
T cell proliferation	44	0.139783	0.0803206	0.163617	0.241441	0.816
lipid biosynthetic process	216	0.196865	0.164093	0.209005	0.2579	0.817
regulation of locomotion	58	0.153881	0.103169	0.17548	0.25721	0.818
Collagen helix repeat	48	0.14577	0.0917688	0.167677	0.251426	0.818
Zinc finger, PHD-type	69	0.160049	0.115204	0.181707	0.247046	0.819
regulation of cytoskeleton organization and biogenesis	33	0.126718	0.0779484	0.152684	0.232336	0.819
intracellular protein transport	338	0.204595	0.174808	0.216121	0.258396	0.82
mrna processing	164	0.189513	0.151192	0.204397	0.250695	0.822
modification-dependent macromolecule catabolic process	105	0.176925	0.132689	0.193123	0.246673	0.822
cyclin	64	0.157314	0.106567	0.177448	0.256243	0.822
regulation of I-kappaB kinase/NF-kappaB cascade	34	0.128219	0.0410233	0.156024	0.246054	0.822
metalloexopeptidase activity	54	0.149006	0.09529	0.172461	0.258516	0.825
Vision	51	0.147585	0.0949834	0.170771	0.250451	0.826
integral to organelle membrane	48	0.144265	0.0924854	0.167899	0.238686	0.826
cell division	168	0.188985	0.146727	0.203955	0.258198	0.827
chromosome, pericentric region	57	0.148934	0.107733	0.172657	0.239762	0.828
dioxygenase activity	53	0.147768	0.0889924	0.17165	0.251175	0.83
collagen	74	0.162064	0.11071	0.182622	0.253726	0.833
locomotion	65	0.156691	0.104415	0.179052	0.257515	0.833
cytoplasm	1804	0.221364	0.208644	0.226601	0.242837	0.834
oxidoreductase activity, acting on single donors with incorporation of molecular oxygen	54	0.14793	0.0947245	0.172304	0.252406	0.834
interleukin binding	39	0.133778	0.0850589	0.159083	0.249581	0.834
cellular macromolecule metabolic process	2443	0.223172	0.214199	0.227686	0.246067	0.835
positive regulation of transcription	264	0.199472	0.172001	0.212131	0.259431	0.835
anterior/posterior pattern formation	82	0.164477	0.12121	0.185445	0.262496	0.835
lamellipodium	52	0.147356	0.0957002	0.17055	0.256194	0.835
phosphate transport	74	0.161154	0.121001	0.182783	0.254095	0.836
glucose metabolic process	90	0.169466	0.119751	0.189588	0.246827	0.837
positive regulation of cytokine biosynthetic process	25	0.109711	0.0340341	0.141013	0.24898	0.837
phosphoinositide biosynthetic process	22	0.1017	0.015739	0.13495	0.247032	0.837
acrosome	19	0.0974794	0.0386047	0.129553	0.244855	0.837
lipid metabolic process	562	0.209928	0.189034	0.219715	0.251332	0.838
mitosis	107	0.173511	0.122594	0.191742	0.254622	0.841
response to wounding	247	0.196556	0.171061	0.21151	0.255487	0.842
translation regulation	32	0.124925	0.0692255	0.15187	0.252548	0.842
Protease inhibitor, Kazal-type	23	0.105981	0.044497	0.136669	0.251984	0.842
coated vesicle membrane	50	0.144978	0.0853307	0.172183	0.258276	0.843
negative regulation of catalytic activity	48	0.143044	0.0786365	0.168183	0.24491	0.843
pyridine nucleotide metabolic process	24	0.107642	0.0540876	0.13868	0.25867	0.844
GPI anchor metabolic process	23	0.106066	0.0427435	0.138104	0.240367	0.844
nicotinamide metabolic process	21	0.102343	0.0218473	0.132625	0.239707	0.845
chordate embryonic development	174	0.189223	0.153166	0.204706	0.254883	0.846
transforming growth factor beta receptor signaling pathway	43	0.135662	0.0721205	0.165138	0.240877	0.846
histone modification	38	0.130164	0.0669889	0.157802	0.241916	0.846
RING	191	0.191413	0.158815	0.206344	0.252331	0.847
Myb, DNA-binding	26	0.11301	0.0636769	0.143057	0.244949	0.847
embryonic development ending in birth or egg hatching	176	0.189139	0.154196	0.205245	0.253963	0.849
zinc	1390	0.219718	0.205506	0.226049	0.243689	0.851
RNA splicing	151	0.183372	0.148382	0.200934	0.257497	0.851
purine nucleoside triphosphate metabolic process	59	0.150187	0.100544	0.174345	0.256498	0.852
cellular protein catabolic process	110	0.174977	0.135843	0.194647	0.251791	0.853
oxidoreductase activity, acting on single donors with incorporation of molecular oxygen, incorporation of two atoms of oxygen	53	0.147768	0.0894533	0.17435	0.265042	0.853
steroid biosynthetic process	58	0.148982	0.0978618	0.173422	0.257114	0.854
hemostasis	55	0.14805	0.0953203	0.172052	0.251323	0.854
RNA binding	502	0.208945	0.190384	0.219317	0.253473	0.855
biopolymer methylation	47	0.141036	0.0817632	0.169421	0.257008	0.856
covalent chromatin modification	40	0.131946	0.0726508	0.162554	0.255244	0.856
transferase activity, transferring pentosyl groups	33	0.124577	0.0663858	0.153657	0.243525	0.857
positive regulation of cellular process	707	0.213122	0.194624	0.222514	0.249256	0.858
innate immune response	71	0.157645	0.104028	0.180674	0.255567	0.859
ribonucleoside triphosphate metabolic process	59	0.149181	0.0918608	0.174906	0.251527	0.859
proteolysis involved in cellular protein catabolic process	108	0.173855	0.134407	0.19449	0.252469	0.86
PHD	73	0.157341	0.101184	0.181704	0.268089	0.86
one-carbon compound metabolic process	83	0.163163	0.121881	0.185872	0.261669	0.863
protein metabolic process	2527	0.222651	0.212804	0.227588	0.240983	0.864
transcription initiation	19	0.0948925	0.0253323	0.127541	0.231095	0.865
protein transport	343	0.20201	0.180705	0.216527	0.254328	0.866
lysosome	105	0.171095	0.131056	0.193128	0.258165	0.866
visual perception	98	0.168017	0.1132	0.191533	0.271514	0.866
neural tube development	40	0.131816	0.0776097	0.162775	0.24185	0.866
membrane protein	41	0.13153	0.0654361	0.162201	0.242994	0.866
protein domain specific binding	69	0.156979	0.113373	0.180191	0.264125	0.867
Pyrimidine metabolism	70	0.155793	0.0999996	0.181088	0.253966	0.867
segmentation	37	0.127097	0.0562672	0.156151	0.259524	0.867
cellular protein metabolic process	2403	0.222527	0.214708	0.227683	0.239697	0.869
regulation of cell motility	55	0.146342	0.0931784	0.173219	0.247755	0.869
ATP metabolic process	49	0.140945	0.0942739	0.169134	0.250243	0.869
integral to Golgi membrane	9	0.0540329	-0.000793293	0.095144	0.2347	0.869
transcription cofactor activity	127	0.177757	0.138339	0.198115	0.253625	0.87
bone mineralization	22	0.100651	0.0465476	0.136284	0.242851	0.87
protease	404	0.205687	0.185308	0.217281	0.247472	0.872
embryonic development	362	0.202768	0.183892	0.215827	0.253517	0.873
tRNA metabolic process	94	0.166985	0.132767	0.19079	0.265635	0.873
Glucose/ribitol dehydrogenase	42	0.134161	0.0827027	0.164209	0.242572	0.873
N-acetylglucosamine metabolic process	22	0.10041	0.0377238	0.134762	0.251249	0.873
positive regulation of cellular metabolic process	323	0.199666	0.177258	0.2144	0.263274	0.874
exonuclease activity	51	0.143218	0.100199	0.168963	0.251143	0.874
cellular lipid metabolic process	477	0.208349	0.187996	0.219149	0.247953	0.875
mononuclear cell proliferation	58	0.145495	0.10632	0.173584	0.239664	0.876
lymphocyte proliferation	58	0.145495	0.0804014	0.17432	0.252237	0.876
coated membrane	56	0.144303	0.105099	0.172564	0.240237	0.876
cofactor biosynthetic process	104	0.16972	0.132717	0.191597	0.25521	0.877
spliceosome	85	0.163131	0.11792	0.188707	0.259988	0.877
CUB	41	0.133106	0.0856368	0.161459	0.244691	0.877
catabolic process	509	0.207989	0.185421	0.220462	0.248015	0.878
membrane coat	56	0.144303	0.0806056	0.173866	0.255093	0.878
monosaccharide transport	26	0.107555	0.0519327	0.142261	0.263987	0.878
cell cycle process	490	0.207504	0.186632	0.219528	0.24579	0.879
glucosamine metabolic process	22	0.10041	0.0381387	0.137502	0.246693	0.879
histone methylation	13	0.0712957	0.00807054	0.111126	0.209356	0.879
regulation of translation	123	0.178063	0.136472	0.19708	0.24623	0.881
zinc ion binding	1678	0.220056	0.208131	0.226233	0.248131	0.882
cofactor metabolic process	191	0.188231	0.160434	0.207162	0.255987	0.882
protein homodimerization activity	116	0.174474	0.141225	0.197788	0.253305	0.883
ATP biosynthetic process	44	0.13299	0.0816162	0.1636	0.245237	0.883
anti-apoptosis	78	0.157278	0.114311	0.183705	0.250502	0.884
metal ion-binding site:Magnesium	68	0.153664	0.106189	0.181447	0.24882	0.884
peptidase activity	580	0.209443	0.193778	0.220768	0.247204	0.885
monocarboxylic acid metabolic process	198	0.190018	0.162971	0.207333	0.255112	0.885
cation-transporting ATPase activity	55	0.144504	0.108242	0.171879	0.24698	0.885
macromolecule biosynthetic process	595	0.210231	0.190111	0.221516	0.247041	0.886
Coiled coil	1054	0.216469	0.199663	0.224349	0.249552	0.887
methylation	50	0.14045	0.0869318	0.170009	0.244755	0.888
Zymogen	149	0.179565	0.146262	0.201339	0.249968	0.89
nucleoside phosphate metabolic process	44	0.13299	0.0842371	0.163381	0.235687	0.89
hexose transport	26	0.107555	0.0432054	0.142465	0.238612	0.891
transport vesicle membrane	25	0.1028	0.0297458	0.142068	0.245779	0.891
positive regulation of hydrolase activity	36	0.121808	0.0506149	0.155527	0.258959	0.892
sensory perception of light stimulus	99	0.167711	0.131674	0.193418	0.247354	0.893
extrinsic to membrane	63	0.147531	0.104951	0.179021	0.269502	0.893
cytokine biosynthetic process	51	0.139101	0.0996321	0.169635	0.25489	0.894
ATPase activity, coupled to transmembrane movement of ions, phosphorylative mechanism	63	0.147816	0.104876	0.177656	0.258359	0.895
cytokine metabolic process	51	0.139101	0.0853397	0.170152	0.239453	0.895
exonuclease activity, active with either ribo- or deoxyribonucleic acids and producing 5'-phosphomonoesters	17	0.0829317	0.0239268	0.124802	0.236974	0.895
RRM	156	0.180979	0.151227	0.203148	0.258489	0.897
RNA recognition motif, RNP-1	133	0.176834	0.144248	0.19946	0.252266	0.897
blood coagulation	52	0.140215	0.0847446	0.172676	0.242113	0.897
biosynthetic process	1066	0.216178	0.200962	0.224565	0.247063	0.898
DNA binding	1543	0.218825	0.210151	0.225934	0.245952	0.899
transcription activator activity	169	0.183798	0.155391	0.203815	0.257014	0.9
transcription repressor activity	138	0.176768	0.144988	0.199417	0.247276	0.901
regionalization	127	0.175936	0.144256	0.198344	0.257224	0.901
Zinc finger, RING/FYVE/PHD-type	108	0.168454	0.135364	0.193734	0.258058	0.901
cell cycle	612	0.209977	0.191339	0.221816	0.245994	0.902
zinc-finger	1076	0.215152	0.201287	0.224446	0.246635	0.904
coagulation	53	0.139945	0.0894533	0.17435	0.265042	0.904
regulation of caspase activity	41	0.12607	0.0810977	0.162812	0.239905	0.904
translation initiation factor activity	75	0.15415	0.116789	0.183262	0.265612	0.905
tRNA processing	42	0.128641	0.0833673	0.161577	0.238379	0.907
water-soluble vitamin metabolic process	37	0.123448	0.0724717	0.158292	0.249636	0.907
positive regulation of metabolic process	345	0.199839	0.181592	0.2153	0.251798	0.908
mrna splicing	126	0.174235	0.139388	0.198671	0.248294	0.908
glucose transport	25	0.100656	0.060248	0.140103	0.233232	0.908
regulation of JNK cascade	17	0.081219	0.029321	0.124846	0.227029	0.909
nucleoside triphosphate biosynthetic process	54	0.140876	0.106904	0.171362	0.249204	0.91
regulation of protein metabolic process	223	0.189818	0.170018	0.209413	0.249377	0.912
primary metabolic process	5637	0.224926	0.219427	0.228848	0.239228	0.913
biopolymer catabolic process	215	0.189477	0.160744	0.208317	0.254323	0.913
protein catabolic process	157	0.178652	0.155424	0.201673	0.258882	0.913
AAA	77	0.153554	0.107306	0.185173	0.255145	0.913
positive regulation of transcription factor activity	20	0.0889737	0.0354776	0.132524	0.236966	0.917
rna-binding	328	0.198806	0.177798	0.214808	0.252354	0.918
contractile fiber	52	0.136604	0.0957002	0.17055	0.256194	0.919
Keratin, type I	37	0.118421	0.0723704	0.158153	0.249907	0.919
positive regulation of protein metabolic process	63	0.145143	0.101267	0.17793	0.251539	0.923
cellular catabolic process	390	0.201248	0.176107	0.217526	0.247546	0.925
apoptotic program	53	0.135885	0.1001	0.170097	0.248177	0.925
hydrogen-exporting ATPase activity, phosphorylative mechanism	23	0.0932453	0.0340316	0.13746	0.248302	0.925
coenzyme metabolic process	161	0.180689	0.152578	0.202991	0.246787	0.926
apical plasma membrane	46	0.129425	0.0843579	0.165275	0.244428	0.926
induction of apoptosis by extracellular signals	18	0.0790309	0.0232025	0.124884	0.235715	0.926
B cell receptor signaling pathway	59	0.14264	0.0975451	0.176637	0.24833	0.927
cholesterol homeostasis	19	0.0810327	0.0246488	0.127912	0.228016	0.928
I-kappaB kinase/NF-kappaB cascade	50	0.13626	0.101991	0.168575	0.250209	0.929
acetylation	479	0.204733	0.18824	0.219111	0.248165	0.931
AAA+ ATPase, core	61	0.140502	0.10504	0.176576	0.26076	0.932
lipid homeostasis	19	0.0810327	0.0421894	0.12851	0.228399	0.934
water-soluble vitamin biosynthetic process	19	0.0791628	0.0129188	0.128731	0.250301	0.935
inflammatory response	48	0.129601	0.0976738	0.168734	0.257086	0.936
macromolecule metabolic process	4884	0.224328	0.218903	0.22894	0.238672	0.937
cytokine activity	176	0.180945	0.145157	0.204616	0.257683	0.937
ATPase activity, coupled to transmembrane movement of substances	124	0.167297	0.139633	0.197956	0.257818	0.937
protein amino acid acylation	25	0.0944453	0.0438388	0.139063	0.242734	0.937
cysteine-type peptidase activity	142	0.174811	0.146228	0.200511	0.258533	0.939
cell cycle	313	0.194935	0.163719	0.214743	0.25168	0.94
coenzyme biosynthetic process	92	0.157931	0.127555	0.190163	0.257823	0.941
sterol homeostasis	19	0.0810327	0.00787087	0.128487	0.224238	0.942
intrinsic to organelle membrane	58	0.138464	0.0856263	0.176204	0.244687	0.943
cytoplasmic part	2679	0.220924	0.213881	0.22768	0.24072	0.944
primary active transmembrane transporter activity	128	0.168231	0.143283	0.196659	0.261502	0.944
purine ribonucleotide metabolic process	71	0.146237	0.104028	0.180674	0.255567	0.944
regulation of cell migration	48	0.129741	0.0848658	0.168593	0.248696	0.944
vitamin metabolic process	60	0.138836	0.106125	0.174456	0.251021	0.945
cellular macromolecule catabolic process	205	0.183184	0.16104	0.207842	0.251864	0.947
nucleotide biosynthetic process	126	0.170943	0.143731	0.198714	0.246424	0.947
interleukin receptor activity	35	0.111872	0.0417428	0.157326	0.247081	0.947
gene expression	2492	0.220012	0.214484	0.22778	0.239629	0.948
macromolecule catabolic process	270	0.190159	0.166568	0.211365	0.250192	0.948
SANT, DNA-binding	46	0.126197	0.0879339	0.165869	0.241989	0.948
organelle envelope	351	0.196165	0.17646	0.215646	0.252978	0.949
ribonucleotide metabolic process	80	0.148886	0.123654	0.184905	0.266823	0.949
dorsal/ventral pattern formation	35	0.111099	0.0688145	0.155738	0.247296	0.949
cellular metabolic process	5619	0.224179	0.220722	0.228806	0.237846	0.95
ATPase activity, coupled to movement of substances	124	0.167297	0.139124	0.19883	0.248206	0.95
mitochondrial membrane	230	0.186358	0.16855	0.209709	0.24976	0.951
purine ribonucleotide biosynthetic process	64	0.141432	0.106567	0.177448	0.256243	0.951
organelle membrane	529	0.204697	0.186459	0.219732	0.253526	0.952
lytic vacuole	156	0.173134	0.155152	0.201798	0.255241	0.954
vitamin biosynthetic process	21	0.0782669	0.0210446	0.134057	0.253054	0.954
metabolic process	6254	0.224662	0.220925	0.228999	0.236038	0.955
hydrolase activity, acting on acid anhydrides, catalyzing transmembrane movement of substances	125	0.168543	0.149449	0.198652	0.259419	0.956
membrane invagination	154	0.173115	0.148568	0.202368	0.255221	0.957
P-P-bond-hydrolysis-driven transmembrane transporter activity	128	0.168231	0.142159	0.198126	0.249256	0.957
transcription	1841	0.217511	0.211499	0.226671	0.243404	0.958
envelope	354	0.195925	0.176642	0.215653	0.254823	0.959
ribonucleotide biosynthetic process	70	0.142266	0.11809	0.180363	0.25384	0.959
vacuole	179	0.177739	0.153736	0.205391	0.251271	0.96
regulation of nucleobase, nucleoside, nucleotide and nucleic acid metabolic process	1815	0.2172	0.208774	0.226638	0.242836	0.961
transit peptide:Mitochondrion	238	0.184152	0.164191	0.20992	0.249098	0.961
mitochondrial inner membrane	211	0.18257	0.16474	0.208553	0.257707	0.961
positive regulation of programmed cell death	172	0.174578	0.148432	0.206123	0.25313	0.964
mitochondrial envelope	247	0.185036	0.164438	0.212405	0.253411	0.965
cysteine-type endopeptidase activity	89	0.151806	0.119645	0.189334	0.264201	0.965
chemokine receptor binding	35	0.109426	0.0677429	0.154609	0.2382	0.965
nucleotide metabolic process	182	0.176522	0.154516	0.205939	0.257063	0.966
endocytosis	154	0.173115	0.148971	0.202155	0.255993	0.966
purine nucleotide metabolic process	81	0.148451	0.127246	0.186225	0.262453	0.966
regulation of apoptosis	362	0.193806	0.183676	0.215228	0.255464	0.967
lysosome	156	0.173134	0.151773	0.202965	0.254801	0.967
protein homooligomerization	31	0.102377	0.0692161	0.150849	0.255515	0.967
ATPase activity, coupled to transmembrane movement of ions	90	0.151996	0.114745	0.187882	0.248098	0.968
Laminin G, Thrombospondin-type, N-terminal	15	0.0570352	0.0175955	0.120496	0.231849	0.968
regulation of gene expression	1904	0.217086	0.21072	0.226833	0.242158	0.969
zinc finger region:RING-type	76	0.143111	0.115786	0.184326	0.257682	0.97
transcription, DNA-dependent	1717	0.215474	0.210785	0.226665	0.248192	0.971
nadp	112	0.156009	0.132017	0.194446	0.255303	0.971
chemotaxis	51	0.123871	0.100199	0.168963	0.251143	0.971
mitochondrial part	298	0.189252	0.171407	0.213792	0.250334	0.972
organelle inner membrane	221	0.181912	0.160599	0.208926	0.252913	0.972
nucleobase, nucleoside and nucleotide metabolic process	192	0.17917	0.161363	0.207383	0.252975	0.972
two-component signal transduction system (phosphorelay)	25	0.0829713	0.0297458	0.142068	0.245779	0.972
regulation of cellular metabolic process	1977	0.21679	0.208718	0.227048	0.245078	0.973
apoptosis	535	0.201646	0.192927	0.219723	0.248221	0.973
coated pit	46	0.118907	0.0843579	0.165275	0.244428	0.973
cytoplasm	4550	0.222922	0.219194	0.228679	0.238885	0.975
regulation of cell cycle	319	0.190328	0.176299	0.214952	0.261133	0.975
regulation of progression through cell cycle	317	0.190307	0.173703	0.21434	0.251561	0.975
purine nucleotide biosynthetic process	72	0.137876	0.115803	0.182136	0.249037	0.975
regulation of transcription	1780	0.216847	0.210925	0.226481	0.245928	0.976
regulation of programmed cell death	368	0.194294	0.17991	0.215974	0.259551	0.976
regulation of transcription, DNA-dependent	1697	0.21518	0.20518	0.226542	0.24193	0.977
endopeptidase activity	367	0.194465	0.174344	0.21604	0.253119	0.977
JNK cascade	41	0.109731	0.0690946	0.163719	0.245924	0.977
nucleobase, nucleoside, nucleotide and nucleic acid metabolic process	2729	0.21921	0.209054	0.227828	0.245747	0.978
RNA metabolic process	2094	0.216526	0.211578	0.22708	0.246833	0.978
programmed cell death	545	0.202009	0.189482	0.220735	0.250145	0.978
EGF calcium-binding	55	0.121865	0.0950215	0.173064	0.258411	0.978
Small chemokine, interleukin-8-like	32	0.0928793	0.0698249	0.151607	0.233035	0.978
RNA biosynthetic process	1721	0.215424	0.210675	0.226601	0.24294	0.979
nucleus	2570	0.218428	0.213605	0.227716	0.241559	0.98
regulation of metabolic process	2060	0.217298	0.213767	0.227094	0.24539	0.981
positive regulation of apoptosis	169	0.172209	0.149439	0.204686	0.250551	0.981
inorganic cation transmembrane transporter activity	130	0.160245	0.145034	0.199161	0.258198	0.981
proteolysis	589	0.201327	0.188476	0.221804	0.248403	0.982
initiation factor	63	0.127704	0.104548	0.17605	0.250671	0.982
stress-activated protein kinase signaling pathway	44	0.11084	0.0861574	0.164944	0.266129	0.982
Zinc finger, FYVE-type	33	0.0943859	0.0635085	0.154007	0.235988	0.982
nucleic acid binding	2518	0.21746	0.212009	0.227477	0.242614	0.983
cell death	560	0.200539	0.188541	0.221028	0.249496	0.984
death	560	0.200539	0.187162	0.22084	0.25083	0.985
induction of apoptosis by intracellular signals	28	0.0821748	0.048271	0.144702	0.260307	0.985
Cellular retinaldehyde-binding/triple function, C-terminal	21	0.0611165	0.0420326	0.133964	0.238821	0.985
determination of left/right symmetry	32	0.0921857	0.0433062	0.152577	0.239819	0.987
determination of symmetry	33	0.0862388	0.0673075	0.152909	0.244884	0.988
induction of programmed cell death	130	0.157059	0.139786	0.199422	0.260793	0.989
induction of apoptosis	130	0.157059	0.140844	0.197769	0.258818	0.99
multifunctional enzyme	54	0.1114	0.09529	0.172461	0.258516	0.992
intracellular part	7039	0.222823	0.221255	0.229214	0.237105	0.994
determination of bilateral symmetry	33	0.0862388	0.0742506	0.152051	0.24198	0.995
intracellular	7419	0.223296	0.222466	0.228893	0.237876	0.996
organelle	5883	0.221931	0.221023	0.22886	0.23764	0.996
intracellular organelle	5879	0.221857	0.220437	0.22884	0.238101	0.996
nucleus	3302	0.21736	0.21325	0.228023	0.24139	0.996
apoptosis	208	0.17347	0.163033	0.20791	0.258993	0.996
Peptidase M10A and M12B, matrixin and adamalysin	37	0.0928422	0.0704655	0.157421	0.240503	0.996
chemokine activity	34	0.0904101	0.0770449	0.153423	0.236803	0.996
Wnt signaling pathway	86	0.132679	0.116749	0.187879	0.25005	0.997
endocytosis	72	0.120317	0.106561	0.181357	0.243146	0.998
Wnt receptor signaling pathway, calcium modulating pathway	20	0.0428675	0.0142971	0.13165	0.249371	0.998
mitochondrion	800	0.198452	0.19155	0.223141	0.249225	0.999
transit peptide	333	0.180091	0.175147	0.215098	0.248948	0.999
membrane-bound organelle	5254	0.218875	0.219744	0.228681	0.237081	1
intracellular membrane-bound organelle	5249	0.218787	0.220387	0.228809	0.238251	1
Mitochondrion	541	0.188909	0.192479	0.21982	0.249601	1
Wnt receptor signaling pathway	106	0.133279	0.135132	0.193008	0.251703	1

## Sheet: corr af
Covariation correlation experiment - Incoming
		Source genes	Random genes of same size
Functional annotation	Size	Correlation	Min Corr	Median Corr	Max Corr	P-value
neurogenesis	312	0.245203	0.17752	0.212037	0.242665	0
Ionic channel	238	0.253494	0.167973	0.207186	0.250416	0
calcium transport	41	0.252632	0.0976208	0.159274	0.234866	0
neurotransmitter binding	92	0.243887	0.129553	0.187119	0.243116	0
neurotransmitter receptor activity	91	0.243562	0.13307	0.187209	0.241272	0
neuron migration	48	0.242845	0.104876	0.1651	0.234652	0
glycoprotein	2415	0.240559	0.212131	0.225331	0.2387	0
blood circulation	87	0.240524	0.123008	0.184643	0.236694	0
axonogenesis	136	0.250042	0.138187	0.196608	0.26035	0.001
gated channel activity	246	0.246833	0.165358	0.208249	0.247026	0.001
substrate specific channel activity	306	0.244808	0.178218	0.211071	0.253258	0.001
neuron projection	106	0.244326	0.137747	0.191489	0.246171	0.001
neurite morphogenesis	146	0.242751	0.148545	0.198923	0.242983	0.001
synapse	138	0.242742	0.144211	0.196664	0.25192	0.001
metal ion transport	357	0.241021	0.179558	0.213245	0.243051	0.001
chloride	45	0.23611	0.098322	0.163903	0.245038	0.001
muscle contraction	69	0.235387	0.123476	0.177726	0.246675	0.001
chloride channel	38	0.227913	0.086885	0.157123	0.228607	0.001
gliogenesis	43	0.227322	0.093131	0.160883	0.2282	0.001
neuromuscular process	40	0.223966	0.0985372	0.15885	0.233722	0.001
ion channel activity	296	0.245905	0.173127	0.211272	0.250882	0.002
neuron development	198	0.24588	0.162376	0.203983	0.252948	0.002
neurite development	175	0.245482	0.158411	0.200979	0.250953	0.002
cell migration	240	0.244784	0.170469	0.207774	0.250491	0.002
cell part morphogenesis	245	0.243303	0.171459	0.207955	0.249763	0.002
cell projection morphogenesis	245	0.243303	0.171106	0.208466	0.245862	0.002
cell projection organization and biogenesis	245	0.243303	0.166632	0.207314	0.250351	0.002
neuron morphogenesis during differentiation	146	0.242751	0.153585	0.197691	0.244612	0.002
cation channel activity	209	0.241228	0.166894	0.205572	0.250411	0.002
signal	2008	0.238799	0.211199	0.224853	0.239882	0.002
voltage-gated cation channel activity	120	0.237213	0.144347	0.192953	0.27142	0.002
muscle system process	69	0.235387	0.108358	0.177072	0.242511	0.002
cell soma	50	0.226164	0.101673	0.16668	0.235739	0.002
transmission of nerve impulse	205	0.245013	0.163226	0.204708	0.252428	0.003
synaptic transmission	170	0.242631	0.161635	0.200442	0.251311	0.003
circulatory system process	87	0.240524	0.126437	0.184495	0.256437	0.003
dendrite	47	0.231278	0.100735	0.163083	0.253045	0.003
passive transmembrane transporter activity	340	0.243132	0.18002	0.212325	0.246475	0.004
generation of neurons	286	0.242203	0.174744	0.210282	0.247695	0.004
behavior	279	0.242147	0.174462	0.21012	0.247442	0.004
chemical homeostasis	202	0.241913	0.15739	0.203998	0.253531	0.004
cellular morphogenesis during differentiation	166	0.238395	0.148351	0.20114	0.254184	0.004
axon	58	0.231341	0.102213	0.171028	0.242686	0.004
nucleotide receptor activity	54	0.227727	0.10491	0.168837	0.238457	0.004
GTPase binding	54	0.22516	0.0997721	0.170356	0.234779	0.004
aminoglycan metabolic process	26	0.214891	0.0598395	0.139371	0.223036	0.004
anion binding	48	0.229512	0.0991374	0.163919	0.240451	0.005
chloride ion binding	48	0.229512	0.105181	0.164346	0.243662	0.005
axon guidance	72	0.228651	0.117114	0.179204	0.244779	0.005
sulfur metabolic process	62	0.228413	0.109058	0.174162	0.244867	0.005
GABA-A receptor activity	32	0.215875	0.0702246	0.14893	0.25752	0.005
glycosaminoglycan metabolic process	26	0.214891	0.0565359	0.141453	0.241981	0.005
channel activity	340	0.243132	0.180315	0.212868	0.249547	0.006
voltage-gated channel activity	157	0.237703	0.150388	0.199698	0.248359	0.006
cellular homeostasis	203	0.236826	0.158009	0.205549	0.240837	0.006
Axon guidance	115	0.233144	0.142053	0.192321	0.246335	0.006
nucleotide receptor activity, G-protein coupled	53	0.227383	0.111661	0.169441	0.245066	0.006
GPCR, family 2, secretin-like	54	0.223776	0.108599	0.169632	0.238216	0.006
Ras GTPase activator activity	37	0.219371	0.0821561	0.154762	0.232596	0.006
GABA receptor activity	35	0.216908	0.0758416	0.152306	0.25646	0.006
telencephalon development	20	0.211604	0.053319	0.128197	0.220753	0.006
synaptosome	22	0.206469	0.0581215	0.131688	0.220563	0.006
homeostatic process	294	0.240501	0.169947	0.211103	0.247037	0.007
voltage-gated channel	114	0.240433	0.140844	0.193011	0.260159	0.007
metal ion transmembrane transporter activity	249	0.237961	0.167154	0.207881	0.252929	0.007
voltage-gated ion channel activity	157	0.237703	0.155702	0.200102	0.258249	0.007
calcium channel activity	45	0.21969	0.100357	0.16251	0.240177	0.007
Neurotransmitter-gated ion-channel	39	0.216335	0.0871156	0.157533	0.226663	0.007
cell-cell signaling	303	0.239878	0.174649	0.211347	0.246283	0.008
di-, tri-valent inorganic cation transport	109	0.232602	0.142313	0.190727	0.24339	0.008
soluble fraction	59	0.22499	0.105575	0.171024	0.244681	0.008
glial cell differentiation	40	0.215011	0.0897992	0.158404	0.229283	0.008
Rab GTPase activator activity	17	0.202065	0.0504705	0.121353	0.229269	0.008
regulation of biological quality	583	0.239506	0.192591	0.218137	0.246948	0.009
anatomical structure morphogenesis	946	0.238523	0.202919	0.221753	0.244654	0.009
ion homeostasis	164	0.232985	0.154381	0.200474	0.252478	0.009
calcium ion transport	86	0.231825	0.120363	0.184254	0.249904	0.009
Neurotransmitter-gated ion-channel transmembrane region	38	0.216308	0.0766321	0.156103	0.255524	0.009
synapse	200	0.236369	0.154539	0.203973	0.242628	0.01
potassium ion transport	148	0.234386	0.148252	0.198044	0.244621	0.01
synaptosome	46	0.217901	0.0919715	0.163179	0.241427	0.01
negative regulation of multicellular organismal process	27	0.206408	0.0639412	0.142472	0.225953	0.01
calcium	547	0.238953	0.186839	0.217949	0.246351	0.011
MAPK signaling pathway	230	0.23431	0.164694	0.20767	0.247321	0.011
repeat:LRR 4	75	0.224436	0.120005	0.179304	0.24383	0.011
regulated secretory pathway	53	0.21721	0.110838	0.168862	0.23787	0.011
nervous system development	557	0.23868	0.187774	0.218367	0.250347	0.012
small GTPase binding	50	0.219602	0.1033	0.165423	0.234418	0.012
neurotransmitter secretion	47	0.217002	0.104973	0.164749	0.231131	0.012
Neurotransmitter-gated ion-channel ligand-binding	39	0.216335	0.0761849	0.158086	0.240269	0.012
glucose homeostasis	27	0.207373	0.0630103	0.14161	0.23241	0.012
inorganic anion transport	144	0.232805	0.152946	0.197724	0.246507	0.013
von Willebrand factor, type A	75	0.224302	0.121834	0.181215	0.246105	0.013
metal ion homeostasis	62	0.21968	0.10721	0.174536	0.241194	0.013
gamma-aminobutyric acid signaling pathway	20	0.209682	0.047637	0.128727	0.227354	0.013
carbohydrate homeostasis	27	0.207373	0.0743786	0.141896	0.259807	0.013
locomotory behavior	181	0.23476	0.157909	0.202259	0.256089	0.014
potassium channel activity	118	0.228971	0.143303	0.193282	0.253748	0.014
VWA	79	0.22557	0.115166	0.181654	0.2397	0.014
neuron differentiation	252	0.237894	0.170186	0.208084	0.262856	0.015
anatomical structure development	1644	0.235181	0.208905	0.224257	0.240203	0.015
tube morphogenesis	115	0.230645	0.142737	0.192912	0.245779	0.015
repeat:LRR 1	90	0.225198	0.120408	0.185378	0.241709	0.015
cellular metal ion homeostasis	62	0.21968	0.11441	0.172615	0.239102	0.015
muscle development	148	0.232516	0.154994	0.197556	0.246257	0.016
cellular di-, tri-valent inorganic cation homeostasis	85	0.225156	0.124436	0.183203	0.243283	0.016
Ion transport	75	0.224074	0.12362	0.179965	0.240946	0.016
calcium ion homeostasis	59	0.217932	0.111919	0.172018	0.238498	0.016
neuromuscular process controlling balance	26	0.20404	0.0686714	0.141276	0.229661	0.016
EGF-like region	201	0.233017	0.162135	0.204539	0.248694	0.017
Ras GTPase binding	47	0.214921	0.0892145	0.164221	0.253127	0.017
RabGAP/TBC	11	0.183149	0.00219916	0.10265	0.245772	0.017
localization of cell	291	0.233215	0.1741	0.21019	0.254731	0.018
Potassium channel, voltage dependent, Kv, tetramerisation	42	0.213459	0.081937	0.159997	0.246578	0.018
repeat:LRR 2	90	0.225198	0.138724	0.185559	0.257205	0.019
chloride transport	59	0.222864	0.106763	0.172272	0.246346	0.019
small GTPase regulator activity	156	0.232426	0.154444	0.199759	0.266427	0.02
postsynaptic membrane	107	0.224676	0.13874	0.191608	0.245641	0.02
repeat:LRR 3	85	0.222437	0.136119	0.183483	0.24252	0.02
regulation of Ras GTPase activity	20	0.193606	0.0400567	0.128195	0.222399	0.02
regulation of multicellular organismal process	225	0.234684	0.166073	0.20628	0.248358	0.021
Postsynaptic cell membrane	91	0.223304	0.138967	0.185563	0.257683	0.021
extracellular ligand-gated ion channel activity	65	0.218081	0.110743	0.175668	0.238749	0.021
elevation of cytosolic calcium ion concentration	19	0.189487	0.0464163	0.126882	0.212151	0.021
regulation of growth	146	0.228228	0.144574	0.19772	0.251654	0.022
di-, tri-valent inorganic cation homeostasis	86	0.224593	0.130387	0.184527	0.247108	0.022
peptide receptor activity	100	0.2241	0.135328	0.188747	0.242306	0.022
ligand-gated ion channel activity	82	0.220473	0.129393	0.182714	0.251358	0.022
cellular calcium ion homeostasis	59	0.217932	0.115784	0.172463	0.239793	0.022
cell fraction	448	0.234535	0.186186	0.215789	0.25036	0.023
neurogenesis	95	0.222152	0.120686	0.187106	0.235307	0.023
domain:Ig-like C2-type 2	82	0.220006	0.132869	0.182247	0.25509	0.023
Hormone receptor, extracellular	24	0.198599	0.0714198	0.136503	0.256046	0.023
PIRSF002350:calmodulin	24	0.195502	0.0550729	0.13774	0.237968	0.024
TBC	13	0.179129	0.0316749	0.108404	0.219227	0.024
regulation of Rab GTPase activity	14	0.177074	0.0372603	0.112009	0.215439	0.024
enzyme linked receptor protein signaling pathway	258	0.232322	0.168149	0.208238	0.253479	0.025
tube development	163	0.231227	0.156191	0.201197	0.251945	0.025
anion channel activity	54	0.2144	0.0962536	0.168759	0.24825	0.025
adult behavior	53	0.213279	0.0995123	0.168539	0.242158	0.025
alternative initiation	37	0.205445	0.0821561	0.154762	0.232596	0.025
GPI anchor binding	99	0.224354	0.131141	0.188687	0.250542	0.027
regulation of neurotransmitter secretion	20	0.188612	0.0519235	0.128658	0.254458	0.027
Sterile alpha motif SAM	67	0.215306	0.109154	0.17603	0.239166	0.028
Helix-loop-helix DNA-binding	51	0.211943	0.100214	0.166969	0.248847	0.028
Proteoglycan	35	0.2037	0.0849272	0.151996	0.233953	0.028
cellular cation homeostasis	96	0.222016	0.140511	0.187045	0.25436	0.029
ligand-gated channel activity	82	0.220473	0.110711	0.182945	0.241606	0.029
domain:Ig-like C2-type 1	82	0.220006	0.11698	0.183055	0.242464	0.029
learning and/or memory	62	0.213003	0.100667	0.175237	0.23951	0.029
RNA helicase, ATP-dependent, DEAD-box type	28	0.194939	0.0656215	0.141442	0.243799	0.029
multicellular organismal development	1786	0.233661	0.20958	0.224647	0.241671	0.03
centrosome	48	0.208702	0.101113	0.164834	0.248473	0.03
mRNA binding	31	0.199067	0.0583384	0.146511	0.237915	0.03
cation homeostasis	97	0.221596	0.133984	0.189324	0.246662	0.031
neuropeptide receptor activity	43	0.203522	0.0994576	0.160466	0.236528	0.032
cell motility	291	0.233215	0.177209	0.210865	0.246147	0.033
cell junction	336	0.232271	0.180686	0.212473	0.251262	0.033
cellular ion homeostasis	146	0.226807	0.153585	0.197691	0.244612	0.033
RNA helicase, DEAD-box type, Q motif	31	0.199197	0.0666996	0.147743	0.236259	0.033
Cleavage on pair of basic residues	180	0.22822	0.148963	0.201865	0.245212	0.034
Rab protein signal transduction	14	0.177074	0.036182	0.111897	0.214275	0.034
anion transport	171	0.229415	0.156394	0.201816	0.252878	0.035
regulation of neurological process	28	0.196392	0.0599529	0.142991	0.257071	0.035
extracellular region	1869	0.232883	0.209168	0.224478	0.240736	0.036
enzyme binding	179	0.228341	0.156811	0.201386	0.25063	0.036
homophilic cell adhesion	103	0.222938	0.134295	0.189369	0.239753	0.036
SAM	67	0.215306	0.110567	0.177437	0.249832	0.036
cell projection part	68	0.215061	0.112836	0.177521	0.231326	0.036
morphogenesis of a branching structure	50	0.207773	0.102843	0.166927	0.246704	0.036
steroid binding	39	0.201025	0.0941554	0.155808	0.235607	0.036
glucan metabolic process	31	0.198193	0.0799665	0.147966	0.225811	0.036
GPS	29	0.19233	0.0768166	0.143679	0.233997	0.036
receptor binding	515	0.235479	0.186872	0.217466	0.244061	0.037
ribosome biogenesis and assembly	116	0.221769	0.141865	0.193186	0.254667	0.037
cytoplasmic vesicle	100	0.220207	0.134432	0.189275	0.25193	0.037
LRRCT	71	0.213927	0.120167	0.178456	0.244777	0.037
Notch signaling pathway	49	0.209142	0.103308	0.167344	0.231522	0.038
secretory granule	36	0.202611	0.0808576	0.155712	0.241809	0.038
serine/threonine-specific protein kinase	35	0.201109	0.0809869	0.152659	0.226865	0.038
cellular chemical homeostasis	146	0.226807	0.148545	0.198923	0.242983	0.039
neuropeptide signaling pathway	83	0.218471	0.128636	0.18297	0.246473	0.039
Cysteine-rich flanking region, C-terminal	69	0.216515	0.113114	0.176154	0.258327	0.039
generation of a signal involved in cell-cell signaling	80	0.215853	0.131855	0.181725	0.247501	0.04
hormone secretion	42	0.204539	0.0830019	0.159618	0.247006	0.04
cell adhesion	301	0.23038	0.174542	0.211431	0.246385	0.041
Lipid-binding	74	0.214725	0.125049	0.180482	0.242481	0.041
regulation of Ras protein signal transduction	102	0.220659	0.123194	0.189076	0.245022	0.042
IQ calmodulin-binding region	67	0.214343	0.110253	0.176449	0.25131	0.042
regulation of neurotransmitter levels	77	0.215566	0.131163	0.180311	0.24053	0.043
glycogen metabolic process	31	0.198193	0.0699635	0.148057	0.239171	0.043
GPS	30	0.196436	0.0686102	0.147718	0.25369	0.043
Death	21	0.184414	0.0543611	0.130481	0.249681	0.043
regulation of Rab protein signal transduction	14	0.177074	0.0401323	0.113345	0.210948	0.044
calmodulin binding	96	0.217737	0.136822	0.187966	0.254835	0.045
FN3	146	0.223495	0.151313	0.198459	0.243833	0.046
sodium ion transport	112	0.219003	0.135313	0.192244	0.246169	0.046
cell junction	247	0.229283	0.161004	0.207724	0.244804	0.047
placenta development	23	0.184178	0.0591152	0.135799	0.237742	0.048
transmembrane receptor protein tyrosine kinase activity	56	0.208481	0.107826	0.16951	0.245352	0.049
Cadherin	107	0.218838	0.14559	0.189599	0.243705	0.05
cell projection	342	0.23143	0.181281	0.213074	0.2493	0.051
synapse part	115	0.221905	0.142053	0.192321	0.246335	0.051
calmodulin-binding	80	0.21604	0.126716	0.18187	0.242883	0.051
Long-term potentiation	62	0.209582	0.11027	0.174606	0.233449	0.051
regulation of lipid metabolic process	20	0.178814	0.0519235	0.128658	0.254458	0.051
hyaluronic acid binding	16	0.174858	0.0211233	0.118798	0.263028	0.053
differentiation	268	0.228736	0.163095	0.209503	0.248118	0.054
voltage-gated potassium channel complex	59	0.208474	0.10064	0.171881	0.23233	0.054
regulation of multicellular organism growth	43	0.201481	0.0736929	0.161489	0.25141	0.054
G-protein signaling, coupled to cAMP nucleotide second messenger	48	0.201359	0.0942498	0.164859	0.241098	0.055
Endoplasmic reticulum targeting sequence	46	0.199304	0.101348	0.163169	0.238298	0.055
ion transport	654	0.231509	0.194888	0.219574	0.248999	0.058
neuropeptide binding	43	0.203522	0.0757363	0.160393	0.244616	0.058
ion transport	397	0.231597	0.184186	0.214723	0.246778	0.059
cell morphogenesis	435	0.23151	0.186144	0.215603	0.247262	0.059
organ morphogenesis	418	0.231099	0.181866	0.215356	0.251612	0.059
Rho guanyl-nucleotide exchange factor activity	62	0.209518	0.116142	0.175046	0.246671	0.059
vesicular fraction	125	0.219908	0.144255	0.194872	0.24664	0.06
second-messenger-mediated signaling	121	0.218854	0.141338	0.192689	0.251123	0.06
response to extracellular stimulus	19	0.18205	0.0505979	0.126936	0.219598	0.06
Ras guanyl-nucleotide exchange factor activity	74	0.209946	0.129059	0.180059	0.251548	0.061
Fibronectin, type III	143	0.223567	0.152659	0.197988	0.247641	0.063
Guanine-nucleotide dissociation stimulator, CDC24	30	0.186938	0.0739798	0.146524	0.23912	0.064
hydrolase activity, acting on carbon-nitrogen (but not peptide) bonds	84	0.212655	0.120198	0.183993	0.232247	0.065
topological domain:Lumenal	195	0.224932	0.154771	0.204712	0.243908	0.066
cell cycle control	22	0.181665	0.0511419	0.132815	0.246645	0.066
lipoprotein	497	0.230368	0.185042	0.217037	0.246095	0.067
organelle localization	34	0.190713	0.0672756	0.151323	0.243519	0.068
microsome	122	0.219573	0.138929	0.193686	0.24723	0.069
cAMP-mediated signaling	53	0.203109	0.101633	0.166658	0.240636	0.069
establishment of organelle localization	25	0.181757	0.0607788	0.138724	0.228673	0.069
cellular structure morphogenesis	435	0.23151	0.189709	0.215856	0.245563	0.071
positive regulation of signal transduction	82	0.209766	0.132632	0.183273	0.235362	0.071
cytoplasmic vesicle	271	0.226691	0.169693	0.209187	0.252672	0.074
tricarboxylic acid cycle	22	0.177826	0.0473774	0.131885	0.22374	0.074
tyrosine-protein kinase	86	0.211897	0.129011	0.185398	0.243749	0.075
ureteric bud development	29	0.187786	0.0559421	0.143743	0.251096	0.075
extracellular matrix structural constituent conferring tensile strength	27	0.182192	0.0576922	0.141302	0.230475	0.076
Ubiquitin-conjugating enzyme, E2	17	0.174112	0.0523071	0.121835	0.224653	0.076
secretin-like receptor activity	20	0.172135	0.042286	0.128145	0.255769	0.077
growth	235	0.225144	0.168934	0.207155	0.250133	0.078
Colorectal cancer	75	0.208743	0.129948	0.179487	0.242313	0.078
regulation of membrane potential	48	0.198401	0.088049	0.165098	0.2415	0.078
transmembrane protein	284	0.228131	0.171356	0.210718	0.247936	0.079
regulation of cell size	112	0.215217	0.142049	0.191659	0.242023	0.079
PIRSF002443:acetylcholine receptor	31	0.185671	0.0596078	0.146877	0.247487	0.08
protein depolymerization	26	0.183592	0.0495251	0.139882	0.242487	0.08
DNA/RNA helicase, DEAD/DEAH box type, N-terminal	49	0.197929	0.110488	0.166182	0.231625	0.081
collagen	34	0.189231	0.0672756	0.151323	0.243519	0.083
acetyl-CoA catabolic process	23	0.179193	0.0673385	0.135212	0.255632	0.083
RhoGEF	51	0.195436	0.110557	0.167854	0.240774	0.084
protein oligomerization	45	0.195914	0.099805	0.162241	0.244079	0.085
membrane fraction	392	0.22819	0.178153	0.214307	0.248222	0.087
signal-anchor	275	0.225313	0.176471	0.209255	0.248897	0.088
tyrosine-specific protein kinase	27	0.180725	0.0687367	0.141572	0.236612	0.088
Palmitate	157	0.221213	0.154236	0.199838	0.244268	0.089
Tyrosine protein kinase, active site	69	0.206427	0.108358	0.177072	0.242511	0.09
nuclear import	53	0.199316	0.108932	0.166815	0.241359	0.09
cyclic-nucleotide-mediated signaling	56	0.201727	0.114339	0.169644	0.242491	0.091
membrane fusion	22	0.173059	0.0655136	0.131818	0.223911	0.091
regulation of small GTPase mediated signal transduction	138	0.21704	0.152963	0.196673	0.255518	0.093
G-protein signaling, coupled to cyclic nucleotide second messenger	51	0.199019	0.0940431	0.168282	0.244955	0.093
maintenance of localization	17	0.164204	0.0326003	0.121954	0.215778	0.093
cytosolic calcium ion homeostasis	21	0.172259	0.0487206	0.132459	0.252871	0.095
regulation of secretion	55	0.20021	0.107373	0.167818	0.240895	0.096
organ development	1109	0.230586	0.204634	0.222468	0.24803	0.097
growth regulation	37	0.18848	0.0842724	0.154965	0.234703	0.097
response to organic substance	31	0.18287	0.0583384	0.146511	0.237915	0.097
multicellular organism growth	51	0.199314	0.107068	0.168225	0.232693	0.098
polysaccharide metabolic process	49	0.195621	0.0932559	0.166441	0.230456	0.098
sarcoplasm	24	0.173653	0.0681171	0.137948	0.229952	0.098
redox-active center	21	0.170286	0.0528522	0.131333	0.259271	0.098
transmembrane receptor protein tyrosine kinase signaling pathway	165	0.220782	0.15458	0.200996	0.242469	0.1
branching morphogenesis of a tube	47	0.194419	0.0879392	0.164111	0.245059	0.1
Symport	83	0.207979	0.128636	0.18297	0.246473	0.101
ruffle	40	0.191499	0.0801787	0.1561	0.248971	0.101
positive regulation of multicellular organism growth	20	0.1685	0.0491916	0.12669	0.224472	0.101
leucine-rich repeat	203	0.222028	0.165328	0.20555	0.251735	0.102
cell projection	75	0.208501	0.11919	0.179915	0.252444	0.102
synapse organization and biogenesis	44	0.193563	0.101157	0.160613	0.232398	0.102
negative regulation of cellular biosynthetic process	30	0.180867	0.0671674	0.146626	0.236478	0.102
guanyl-nucleotide exchange factor activity	129	0.216374	0.151563	0.19653	0.262768	0.103
memory	16	0.15941	0.0390217	0.118021	0.225986	0.103
cell growth	103	0.212939	0.141379	0.189539	0.261021	0.104
Leucine-rich repeat	186	0.220275	0.157922	0.203298	0.251657	0.105
phosphotransferase	104	0.211991	0.136452	0.19008	0.257615	0.106
Helicase, superfamily 1 and 2, ATP-binding	78	0.205797	0.115973	0.180899	0.241495	0.107
protein amino acid dephosphorylation	110	0.212529	0.131348	0.191815	0.244115	0.108
microtubule cytoskeleton organization and biogenesis	55	0.196015	0.102868	0.169127	0.237754	0.109
central nervous system development	202	0.222489	0.166564	0.204842	0.25522	0.11
ATP-dependent helicase activity	91	0.209835	0.130877	0.186837	0.241549	0.11
carboxylic acid transmembrane transporter activity	66	0.202305	0.118242	0.174995	0.244912	0.11
detection of external stimulus	53	0.197585	0.108467	0.169762	0.234232	0.11
cellular polysaccharide metabolic process	49	0.195621	0.091767	0.165988	0.255709	0.11
activation of protein kinase activity	33	0.18291	0.0755981	0.150818	0.24043	0.111
regulation of progression through mitotic cell cycle	23	0.171927	0.0604722	0.135222	0.236227	0.111
Developmental protein	539	0.228581	0.188882	0.218349	0.250229	0.116
hydroxylation	52	0.194587	0.107236	0.166598	0.241709	0.116
cofactor catabolic process	32	0.181342	0.0592651	0.148179	0.245572	0.116
coenzyme catabolic process	28	0.175493	0.0705773	0.144233	0.226328	0.116
peripheral nervous system development	23	0.172559	0.0488865	0.134308	0.229947	0.116
response to abiotic stimulus	149	0.216479	0.157254	0.199186	0.25818	0.117
membrane depolarization	19	0.162425	0.0594034	0.127097	0.25396	0.117
tubulin binding	62	0.200629	0.116163	0.173598	0.237332	0.118
DNA replication initiation	18	0.162057	0.0319119	0.124521	0.219528	0.118
phosphoric diester hydrolase activity	64	0.203098	0.119922	0.175827	0.243771	0.119
Renal cell carcinoma	59	0.200423	0.100924	0.171446	0.242119	0.119
odontogenesis	35	0.18345	0.0795698	0.152626	0.234182	0.119
structural molecule activity	464	0.226961	0.185663	0.216125	0.248365	0.12
response to drug	28	0.176337	0.0732601	0.143665	0.235338	0.12
Leucine-rich repeat, typical subtype	105	0.209414	0.140158	0.189093	0.244576	0.121
Sterile alpha motif-type	53	0.196541	0.108398	0.168312	0.240062	0.121
neuropeptide Y receptor activity	34	0.183939	0.0762152	0.15135	0.258191	0.121
trans-Golgi network transport vesicle membrane	19	0.162963	0.0531807	0.126321	0.225611	0.121
Golgi-associated vesicle membrane	26	0.175308	0.0493394	0.140601	0.231627	0.122
cation transport	439	0.227617	0.188027	0.216329	0.242411	0.123
striated muscle development	114	0.211854	0.139331	0.192273	0.257706	0.123
diacylglycerol binding	44	0.188959	0.0935726	0.162459	0.2308	0.123
acetyl-CoA metabolic process	33	0.179823	0.0786487	0.148838	0.231104	0.123
axon extension	22	0.168548	0.0441468	0.13482	0.242117	0.123
LRR_TYP	108	0.210239	0.140047	0.191213	0.240001	0.124
domain:EF-hand 2	101	0.208863	0.137476	0.190231	0.245817	0.125
DEAD-like helicase, N-terminal	81	0.205154	0.130009	0.182271	0.241897	0.125
organic acid transmembrane transporter activity	67	0.201268	0.110567	0.177437	0.249832	0.125
regulation of myeloid cell differentiation	31	0.181312	0.0559132	0.14686	0.250909	0.125
protein tyrosine phosphatase activity	81	0.206873	0.118666	0.182973	0.242688	0.126
nucleocytoplasmic transport	95	0.207893	0.134644	0.187133	0.241975	0.128
DH	51	0.195436	0.107068	0.168225	0.232693	0.128
cellular response to stress	19	0.161207	0.0460683	0.124581	0.233084	0.128
cholesterol transport	17	0.155702	0.0310314	0.12008	0.239606	0.128
DNA/RNA helicase, C-terminal	74	0.202405	0.119739	0.179185	0.240805	0.13
sh3-binding	48	0.19373	0.105369	0.166254	0.232226	0.131
phosphatase inhibitor activity	20	0.164173	0.046362	0.128788	0.227156	0.131
cell adhesion	565	0.227422	0.192909	0.217544	0.253105	0.132
biological adhesion	565	0.227422	0.192909	0.217544	0.253105	0.132
nuclear transport	95	0.207893	0.124985	0.187166	0.246305	0.132
EF-Hand type	145	0.216014	0.153447	0.198004	0.245679	0.133
Fibronectin, type III-like fold	140	0.215407	0.149686	0.196847	0.250842	0.133
positive regulation of transferase activity	91	0.207481	0.129773	0.186421	0.243892	0.133
cellular protein complex assembly	40	0.187041	0.092419	0.158607	0.238838	0.133
cell fate commitment	80	0.203793	0.129572	0.181766	0.240706	0.134
repeat:LRR 6	59	0.198286	0.112994	0.1729	0.242082	0.134
sodium transport	80	0.204114	0.128021	0.183226	0.248096	0.135
symporter activity	138	0.215991	0.150924	0.196549	0.247315	0.136
somatic recombination of immunoglobulin gene segments	21	0.165723	0.0635842	0.130266	0.232574	0.136
odontogenesis of dentine-containing teeth	32	0.179423	0.0702246	0.14893	0.25752	0.137
tetrapyrrole metabolic process	18	0.155982	0.0381868	0.123464	0.222507	0.137
BMP signaling pathway	27	0.172056	0.0687367	0.141572	0.236612	0.138
peptide binding	124	0.212036	0.148894	0.194043	0.239105	0.139
domain:EF-hand 1	101	0.207861	0.135364	0.188744	0.241651	0.14
regulation of transport	82	0.205989	0.11698	0.183055	0.242464	0.14
regulation of GTPase activity	54	0.194417	0.0917503	0.168314	0.245148	0.14
clathrin coated vesicle membrane	35	0.178842	0.0881873	0.152663	0.240928	0.14
metanephros development	41	0.18529	0.0791074	0.159329	0.241954	0.141
regulation of axonogenesis	29	0.177006	0.0684206	0.145458	0.220119	0.141
Voltage-dependent potassium channel	33	0.179576	0.0754823	0.149943	0.225218	0.142
tissue homeostasis	22	0.164641	0.0609808	0.132633	0.255646	0.142
DEXDc	90	0.207218	0.128758	0.186091	0.241586	0.144
skeletal muscle fiber development	57	0.193422	0.109497	0.169502	0.245414	0.144
multicellular organismal homeostasis	22	0.164641	0.0476928	0.132649	0.23778	0.145
chromosome, telomeric region	11	0.141584	0.0287459	0.100163	0.228966	0.145
anion transmembrane transporter activity	107	0.210022	0.132954	0.190991	0.246279	0.148
peptide secretion	27	0.170074	0.0603399	0.141786	0.233687	0.149
secondary active transmembrane transporter activity	183	0.217962	0.163109	0.203155	0.246544	0.15
muscle cell differentiation	57	0.193722	0.108467	0.169707	0.244926	0.15
peptide hormone secretion	26	0.170074	0.0704578	0.140466	0.235285	0.15
membrane-bound vesicle	194	0.219272	0.159555	0.204294	0.248085	0.151
cell-cell adhesion	224	0.220182	0.163477	0.207127	0.254727	0.152
immunoglobulin production	27	0.169982	0.0603666	0.142585	0.235842	0.152
RNA splicing, via transesterification reactions	47	0.185655	0.0999981	0.163471	0.238809	0.153
production of molecular mediator of immune response	27	0.169982	0.0680625	0.142645	0.226353	0.153
porphyrin metabolic process	18	0.155982	0.0471337	0.124558	0.252979	0.153
heart development	136	0.213737	0.153975	0.197637	0.268143	0.154
ion transmembrane transporter activity	573	0.227416	0.192221	0.218723	0.246931	0.156
G-protein signaling, adenylate cyclase activating pathway	31	0.175946	0.0772617	0.147553	0.230669	0.156
regulation of bone remodeling	23	0.165684	0.0604722	0.135222	0.236227	0.156
ribonucleoprotein binding	19	0.159016	0.0502482	0.126847	0.233684	0.156
sterol transport	18	0.154178	0.0446068	0.122509	0.227032	0.157
notch signaling pathway	32	0.174558	0.0633717	0.147518	0.242301	0.159
heme metabolic process	16	0.149123	0.0371473	0.11819	0.221983	0.159
DNA-dependent DNA replication	48	0.189166	0.100266	0.164361	0.243305	0.162
Melanogenesis	88	0.204616	0.116287	0.186144	0.244548	0.164
Armadillo	31	0.17453	0.0819922	0.148671	0.237902	0.164
protein amino acid N-linked glycosylation	21	0.159124	0.0543611	0.130481	0.249681	0.165
regulation of cell growth	88	0.203941	0.126981	0.184783	0.25426	0.168
vesicle membrane	75	0.200947	0.123071	0.180537	0.240014	0.168
Ras protein signal transduction	149	0.212165	0.155186	0.19882	0.265004	0.169
muscle fiber development	57	0.193422	0.107271	0.17127	0.246669	0.169
EGF	150	0.213234	0.148939	0.199687	0.248306	0.17
solute:cation symporter activity	54	0.189966	0.101026	0.169028	0.247365	0.17
kinase regulator activity	74	0.198858	0.121962	0.180093	0.247356	0.171
negative regulation of protein metabolic process	67	0.197189	0.114033	0.176774	0.24534	0.171
cellular response to stimulus	27	0.167458	0.0677711	0.139827	0.245972	0.171
somatic diversification of immunoglobulins	25	0.166127	0.0648027	0.137444	0.245197	0.171
ribonucleoprotein complex biogenesis and assembly	190	0.21735	0.162254	0.203319	0.258673	0.172
leading edge	84	0.201552	0.105652	0.183746	0.246399	0.172
cellular respiration	29	0.174204	0.0684848	0.145338	0.230338	0.172
somatic cell DNA recombination	23	0.163612	0.0501708	0.135552	0.238496	0.172
myristate	84	0.201567	0.127863	0.183745	0.258481	0.173
positive regulation of growth	23	0.167042	0.0501539	0.136396	0.219321	0.173
phosphotransferase activity, nitrogenous group as acceptor	27	0.166484	0.0582059	0.141393	0.22183	0.173
Zinc finger, DHHC-type	23	0.163625	0.0657141	0.136512	0.229723	0.173
protein homodimerization activity	116	0.209548	0.143791	0.192612	0.246216	0.174
transport vesicle	39	0.180083	0.0784222	0.157036	0.238048	0.174
somatic diversification of immune receptors via germline recombination within a single locus	23	0.163612	0.0673385	0.135212	0.255632	0.175
insulin secretion	21	0.160006	0.0445616	0.132238	0.24126	0.176
GTPase regulator activity	285	0.220355	0.172147	0.209973	0.248149	0.177
developmental maturation	85	0.203563	0.134595	0.184432	0.240483	0.177
protein amino acid glycosylation	58	0.190601	0.112109	0.171924	0.235026	0.178
voltage-gated potassium channel activity	87	0.202843	0.129194	0.185968	0.239606	0.179
regulation of hormone secretion	20	0.156031	0.0488689	0.129097	0.216356	0.179
lipase activity	68	0.197392	0.0994663	0.177683	0.238251	0.18
cytoplasmic vesicle membrane	63	0.193272	0.109662	0.175175	0.239475	0.18
positive regulation of kinase activity	87	0.202476	0.126276	0.18437	0.245771	0.181
positive regulation of developmental process	74	0.198667	0.129059	0.180059	0.251548	0.181
hydro-lyase activity	48	0.187124	0.100266	0.164361	0.243305	0.181
RNA splicing, via transesterification reactions with bulged adenosine as nucleophile	47	0.185655	0.0995771	0.163202	0.240795	0.181
EFh	177	0.215302	0.158782	0.201891	0.253721	0.182
protein kinase regulator activity	60	0.193884	0.119904	0.173521	0.242	0.183
negative regulation of biological process	831	0.226918	0.200686	0.22075	0.252195	0.184
smooth muscle contraction	27	0.167429	0.0603666	0.142585	0.235842	0.184
enzyme inhibitor activity	186	0.216132	0.161141	0.202939	0.25082	0.185
disease mutation	62	0.193783	0.109773	0.173638	0.235648	0.185
urogenital system development	63	0.192901	0.106884	0.175285	0.243343	0.185
cation transmembrane transporter activity	425	0.224368	0.185682	0.215373	0.248771	0.186
Pleckstrin-like	193	0.217053	0.165747	0.203884	0.249877	0.186
detection of stimulus	60	0.192513	0.114655	0.172455	0.238915	0.186
nuclear mRNA splicing, via spliceosome	47	0.185655	0.101594	0.164385	0.233822	0.186
Calcium-binding EF-hand	166	0.213352	0.152987	0.200805	0.257477	0.187
structural protein	83	0.201045	0.128636	0.18297	0.246473	0.187
phosphoinositide binding	157	0.21413	0.155702	0.200102	0.258249	0.188
Alpha/beta hydrolase fold-1	24	0.16172	0.0500579	0.136315	0.239618	0.188
PIRSF000564:kinase-related transforming protein	30	0.171012	0.0719938	0.146847	0.239849	0.189
bone remodeling	84	0.201589	0.111634	0.183411	0.240553	0.19
G protein-coupled receptor	42	0.180741	0.0931067	0.158798	0.234533	0.191
Neutrophil cytosol factor 2	28	0.168218	0.0682474	0.143677	0.229063	0.191
intracellular signaling cascade	989	0.228052	0.201684	0.222307	0.240529	0.192
protein import into nucleus	51	0.187309	0.103496	0.167267	0.23629	0.192
cytosolic part	89	0.202335	0.109931	0.185694	0.245072	0.193
EGF	152	0.212317	0.157076	0.198789	0.247165	0.194
PIRSF002406:vertebrate rhodopsin	62	0.193791	0.117556	0.173452	0.246552	0.194
negative regulation of growth	33	0.173144	0.0707811	0.149988	0.23753	0.194
helicase	105	0.205499	0.138192	0.191763	0.246693	0.195
DNA recombination	68	0.19468	0.120502	0.175632	0.246117	0.195
oxidoreductase activity, acting on the CH-CH group of donors	39	0.179631	0.0778273	0.15757	0.240944	0.195
ER-nuclear signaling pathway	21	0.155019	0.0516831	0.129576	0.21628	0.195
positive regulation of protein kinase activity	83	0.200323	0.125231	0.182159	0.249616	0.196
Golgi-associated vesicle	46	0.184234	0.101354	0.163955	0.233633	0.196
negative regulation of metabolic process	316	0.221785	0.170729	0.211895	0.244357	0.197
amino acid derivative metabolic process	74	0.197682	0.106818	0.180202	0.244742	0.197
monovalent inorganic cation transport	291	0.220433	0.179149	0.211005	0.265963	0.198
dephosphorylation	124	0.20913	0.132389	0.194489	0.246067	0.198
trans-Golgi network transport vesicle	24	0.160483	0.0627888	0.135195	0.229779	0.198
MAPKKK cascade	109	0.206071	0.141954	0.190807	0.25899	0.199
stress response	40	0.180173	0.0923874	0.158197	0.235595	0.199
detection of abiotic stimulus	45	0.1825	0.0950979	0.161516	0.24867	0.2
non-membrane spanning protein tyrosine kinase activity	29	0.16824	0.0732867	0.144559	0.233413	0.2
CD9/CD37/CD63 antigen	8	0.117679	0.0151389	0.0880691	0.218798	0.2
somatic diversification of immune receptors	27	0.166661	0.069766	0.142256	0.226858	0.202
regulation of cell differentiation	143	0.209881	0.153564	0.197202	0.24691	0.203
ank repeat	167	0.213197	0.155921	0.201344	0.251074	0.204
GTPase activator activity	139	0.212108	0.145741	0.19708	0.244249	0.205
PH	205	0.217132	0.158464	0.205476	0.244882	0.206
negative regulation of cell proliferation	116	0.205837	0.14592	0.191963	0.244144	0.209
domain:PH	100	0.202572	0.135033	0.187549	0.242815	0.209
heterocycle metabolic process	65	0.191756	0.117187	0.174247	0.238097	0.21
Tudor	13	0.135362	0.0307091	0.107563	0.221674	0.21
vasculature development	179	0.214242	0.15659	0.202841	0.246657	0.211
lipid transporter activity	41	0.177709	0.0979745	0.158883	0.254747	0.212
regulation of neuron apoptosis	37	0.174171	0.0859705	0.153362	0.229363	0.212
negative regulation of neuron apoptosis	24	0.160123	0.0550729	0.13774	0.237968	0.213
transmembrane receptor protein serine/threonine kinase signaling pathway	72	0.195652	0.111778	0.179608	0.247266	0.214
identical protein binding	238	0.217084	0.166048	0.207675	0.256389	0.216
growth factor binding	50	0.185523	0.0935376	0.164983	0.237761	0.217
amino acid transmembrane transporter activity	45	0.182489	0.0899521	0.160723	0.242117	0.217
egf-like domain	170	0.21218	0.160223	0.201056	0.253564	0.218
negative regulation of biosynthetic process	36	0.173537	0.089022	0.154198	0.231191	0.219
sodium	69	0.193244	0.113114	0.176154	0.258327	0.22
C2	96	0.202295	0.134087	0.186858	0.254865	0.221
blood vessel development	176	0.2128	0.160149	0.201684	0.263195	0.222
substrate-specific transmembrane transporter activity	664	0.22595	0.194091	0.219504	0.247624	0.223
glycoprotein metabolic process	84	0.199038	0.136348	0.183345	0.255001	0.223
regulation of Rho protein signal transduction	66	0.192517	0.110374	0.175575	0.242376	0.223
glycoprotein biosynthetic process	67	0.191261	0.116588	0.175359	0.238675	0.224
neurotransmitter transport	41	0.177945	0.0887233	0.158425	0.252188	0.224
extracellular matrix structural constituent	55	0.187471	0.09639	0.169229	0.246716	0.226
potassium transport	86	0.199397	0.11567	0.185506	0.241753	0.229
protein phosphatase regulator activity	37	0.1746	0.0804741	0.156337	0.241951	0.229
cytoplasmic vesicle part	67	0.192498	0.114033	0.176774	0.24534	0.23
biopolymer glycosylation	60	0.18841	0.106625	0.17274	0.236251	0.23
cellular carbohydrate metabolic process	245	0.216304	0.166689	0.207853	0.255374	0.231
C2 calcium-dependent membrane targeting	92	0.201651	0.130659	0.187495	0.241798	0.231
clathrin vesicle coat	33	0.170439	0.0795562	0.149577	0.228491	0.231
guanine-nucleotide releasing factor	68	0.192545	0.109413	0.176516	0.243076	0.232
protein import	58	0.186608	0.112109	0.171924	0.235026	0.234
G-protein-coupled receptor binding	54	0.185413	0.10028	0.167293	0.244031	0.235
protein amino acid autophosphorylation	36	0.171942	0.0841962	0.154261	0.238344	0.235
Ubiquitin-associated/translation elongation factor EF1B, N-terminal	27	0.16212	0.0742146	0.143192	0.236157	0.235
negative regulation of translation	27	0.160304	0.0528839	0.141154	0.246964	0.235
sodium ion binding	82	0.197502	0.11698	0.183055	0.242464	0.237
oxidoreductase activity, acting on paired donors, with incorporation or reduction of molecular oxygen, 2-oxoglutarate as one donor, and incorporation of one atom each of oxygen into both donors	28	0.160811	0.0673727	0.141634	0.222594	0.238
protein complex assembly	151	0.211288	0.148135	0.198829	0.249014	0.239
sugar transport	28	0.162274	0.0705941	0.142477	0.230576	0.241
P2 purinoceptor	20	0.151234	0.0467516	0.128056	0.229981	0.241
autophosphorylation	32	0.16749	0.0702246	0.14893	0.25752	0.242
ANK	178	0.213197	0.163024	0.202819	0.240746	0.243
erythrocyte differentiation	33	0.167908	0.0707811	0.149988	0.23753	0.243
positive regulation of locomotion	18	0.14479	0.0392656	0.123664	0.232635	0.243
phosphatase regulator activity	41	0.176836	0.0976208	0.159274	0.234866	0.244
Ubl conjugation pathway	286	0.217875	0.171899	0.209922	0.248665	0.247
nitrogen compound biosynthetic process	73	0.19299	0.107994	0.179861	0.242282	0.249
helicase activity	125	0.205807	0.142343	0.194468	0.250806	0.25
cell maturation	70	0.192397	0.113337	0.178928	0.246516	0.25
kidney development	58	0.187396	0.119915	0.172474	0.240795	0.25
learning	43	0.176117	0.0935444	0.161666	0.232263	0.25
myoblast differentiation	32	0.165539	0.0769073	0.148635	0.232546	0.25
skeletal muscle development	88	0.198382	0.131209	0.186053	0.240102	0.251
phospholipase activity	51	0.183199	0.0933773	0.165769	0.238298	0.252
mRNA transport	47	0.179694	0.100312	0.163131	0.233558	0.253
neurotransmitter metabolic process	29	0.165157	0.0684848	0.145338	0.230338	0.254
phosphoprotein phosphatase activity	137	0.206831	0.152544	0.196386	0.257338	0.258
positive regulation of cell motility	18	0.14479	0.0471337	0.124558	0.252979	0.258
cell development	979	0.226985	0.20102	0.222337	0.244073	0.259
LRRNT	82	0.194832	0.11969	0.183322	0.240004	0.259
ErbB signaling pathway	79	0.194022	0.129321	0.181459	0.247596	0.259
tight junction	48	0.18091	0.0893305	0.162695	0.235183	0.26
pigment biosynthetic process	23	0.153332	0.0690626	0.134629	0.221539	0.26
blood vessel morphogenesis	151	0.209509	0.156338	0.198142	0.261246	0.261
positive regulation of biosynthetic process	46	0.178703	0.0983264	0.16207	0.240381	0.262
macromolecule biosynthetic process	595	0.223952	0.191963	0.218598	0.242288	0.263
enzyme regulator activity	592	0.224341	0.193753	0.218951	0.24638	0.265
repressor	237	0.216009	0.166034	0.207916	0.249254	0.265
tissue remodeling	99	0.200523	0.1335	0.189251	0.252089	0.265
dna replication	70	0.191999	0.1186	0.178498	0.249351	0.265
multicellular organism reproduction	53	0.183018	0.0915259	0.16758	0.246327	0.265
transmembrane transporter activity	779	0.225539	0.199664	0.220469	0.247866	0.267
EGF-like, type 3	147	0.207329	0.154293	0.197538	0.247132	0.267
integral to endoplasmic reticulum membrane	29	0.161465	0.068649	0.144304	0.23332	0.267
Collagen helix repeat	48	0.178749	0.0988397	0.165073	0.243459	0.268
protein autoprocessing	39	0.171758	0.0930249	0.156685	0.235802	0.271
regulation of developmental process	239	0.214756	0.167384	0.206889	0.251118	0.272
one-carbon compound metabolic process	83	0.195312	0.125903	0.184387	0.242667	0.272
protein heterodimerization activity	68	0.189945	0.118953	0.176889	0.236227	0.272
Sugar transporter superfamily	26	0.157394	0.0588723	0.140578	0.233901	0.274
apoptotic mitochondrial changes	18	0.144114	0.0512059	0.12429	0.221924	0.275
Prostate cancer	78	0.192539	0.115973	0.180899	0.241495	0.276
double-strand break repair	21	0.149534	0.0528522	0.131333	0.259271	0.276
protein tyrosine/serine/threonine phosphatase activity	33	0.167018	0.0801166	0.150898	0.230261	0.277
Leucine-rich repeat, cysteine-rich flanking region, N-terminal	82	0.194832	0.125272	0.181812	0.251358	0.278
carbon-oxygen lyase activity	57	0.18319	0.110238	0.171576	0.23546	0.278
cell redox homeostasis	33	0.165253	0.0664719	0.148884	0.247596	0.278
positive regulation of catalytic activity	149	0.207478	0.151197	0.198442	0.259525	0.279
leukocyte differentiation	115	0.201443	0.146115	0.19161	0.244877	0.279
myeloid cell differentiation	84	0.196348	0.127282	0.184769	0.234926	0.279
Pleckstrin homology-type	212	0.213619	0.163903	0.205329	0.247853	0.28
neurotransmitter receptor	35	0.166948	0.0735491	0.152347	0.245398	0.28
pigment metabolic process	29	0.161063	0.0678982	0.14643	0.250513	0.28
clathrin adaptor complex	25	0.153033	0.063623	0.137468	0.231046	0.28
Armadillo-like helical	92	0.196828	0.130223	0.185183	0.244372	0.282
Acute myeloid leukemia	50	0.178965	0.0992348	0.165921	0.239829	0.282
G-protein signaling, coupled to IP3 second messenger (phospholipase C activating)	35	0.166311	0.0849272	0.151996	0.233953	0.282
alkali metal ion binding	165	0.209669	0.156926	0.201962	0.251336	0.283
FAD binding	58	0.183851	0.116511	0.170735	0.239554	0.283
E1-E2 ATPase-associated region	24	0.153851	0.0550729	0.13774	0.237968	0.283
regulation of neuron differentiation	29	0.158946	0.0636758	0.144381	0.23696	0.285
Ankyrin	160	0.208132	0.154606	0.199254	0.245899	0.286
reproductive process in a multicellular organism	53	0.183018	0.106451	0.169066	0.249313	0.287
Small GTP-binding protein domain	137	0.205017	0.146646	0.196653	0.249324	0.289
spermatogenesis	58	0.183094	0.11253	0.170861	0.242791	0.291
nucleic acid transport	52	0.17958	0.107566	0.16754	0.238036	0.291
intrinsic to endoplasmic reticulum membrane	35	0.165614	0.0910786	0.152553	0.235775	0.291
epithelial cell proliferation	28	0.157446	0.0599529	0.142991	0.257071	0.291
Ras GTPase	139	0.20702	0.147508	0.19772	0.247226	0.293
regulation of neurogenesis	42	0.173996	0.0898016	0.160125	0.22939	0.293
substrate-specific transporter activity	828	0.225055	0.196692	0.221148	0.248166	0.294
RNA transport	52	0.17958	0.0994595	0.167858	0.241471	0.294
amino acid derivative biosynthetic process	23	0.151245	0.0501708	0.135552	0.238496	0.294
Cadherin, N-terminal	64	0.188616	0.107687	0.175626	0.252603	0.295
amine biosynthetic process	57	0.182074	0.10192	0.170816	0.238229	0.295
chemokine receptor activity	25	0.15448	0.0607788	0.138724	0.228673	0.295
formation of primary germ layer	24	0.150293	0.055851	0.136513	0.223707	0.295
extracellular matrix part	80	0.193365	0.126982	0.183056	0.244373	0.296
phosphate transport	74	0.190803	0.110351	0.180459	0.231604	0.296
potassium	92	0.196306	0.132618	0.186952	0.239417	0.297
Golgi membrane	76	0.190811	0.123747	0.180055	0.242858	0.297
RNA localization	52	0.17958	0.0959547	0.168526	0.236976	0.297
wd repeat	207	0.213154	0.166795	0.205528	0.250818	0.299
lipid transport	39	0.171902	0.0958331	0.157423	0.233345	0.3
fatty acid oxidation	24	0.150904	0.065439	0.135811	0.246186	0.3
clathrin coat	36	0.166868	0.0705806	0.153869	0.24866	0.301
potassium ion binding	97	0.197479	0.132503	0.187162	0.245317	0.302
protein domain specific binding	69	0.186847	0.123051	0.176385	0.24561	0.302
Phorbol-ester binding	36	0.168572	0.0800534	0.15479	0.231665	0.303
AP-type membrane coat adaptor complex	25	0.153033	0.0538614	0.139078	0.259897	0.304
Immunoglobulin	146	0.205749	0.14297	0.197865	0.24632	0.305
chemokine binding	26	0.152217	0.0638831	0.138306	0.226933	0.306
establishment of RNA localization	52	0.17958	0.0939507	0.166031	0.236877	0.307
transport vesicle membrane	25	0.152828	0.066858	0.139507	0.230964	0.308
protein kinase cascade	229	0.213781	0.164483	0.20681	0.245636	0.31
hemopoiesis	187	0.210179	0.159709	0.203383	0.247715	0.312
phosphoinositide-mediated signaling	49	0.176256	0.107069	0.164909	0.241357	0.312
secretion by cell	199	0.211583	0.157341	0.204783	0.243808	0.313
Ras small GTPase, Rho type	21	0.145966	0.0483528	0.131107	0.222165	0.313
neuron apoptosis	44	0.173239	0.0900966	0.162703	0.234783	0.315
ubiquitin-protein ligase activity	76	0.19027	0.129115	0.180756	0.254478	0.317
PDZ/DHR/GLGF	109	0.199546	0.132139	0.191163	0.246888	0.319
PIRSF001711:ADP-ribosylation factor	27	0.156115	0.05816	0.142664	0.247181	0.319
trans-Golgi network	38	0.169307	0.0841636	0.157171	0.236339	0.32
photoreceptor cell differentiation	19	0.140054	0.0334753	0.127107	0.223308	0.32
clathrin-coated vesicle	71	0.188427	0.122889	0.178554	0.248279	0.321
ARF/SAR superfamily	29	0.157055	0.0664425	0.145152	0.238106	0.321
Cyclin-like F-box	58	0.181289	0.116511	0.170735	0.239554	0.322
small protein conjugating enzyme activity	77	0.190343	0.127084	0.181195	0.251886	0.323
Elongation factor	18	0.136995	0.0392656	0.123664	0.232635	0.324
HEAT	54	0.181149	0.0992749	0.170986	0.244533	0.325
Tetratricopeptide TPR2	31	0.160439	0.0819922	0.148671	0.237902	0.325
brain development	156	0.207321	0.154444	0.199759	0.266427	0.326
extracellular structure organization and biogenesis	91	0.195046	0.132035	0.186915	0.241777	0.326
amine metabolic process	330	0.217094	0.178938	0.212059	0.251325	0.327
negative regulation of transcription from RNA polymerase II promoter	121	0.201354	0.138953	0.193135	0.247526	0.327
gamete generation	203	0.211062	0.167984	0.20544	0.246353	0.329
phospholipid binding	195	0.210952	0.161553	0.204456	0.247743	0.331
sexual reproduction	238	0.213759	0.169115	0.208206	0.256973	0.333
Basic helix-loop-helix dimerisation region bHLH	72	0.18668	0.117719	0.178432	0.241249	0.334
EGF-like	107	0.198249	0.130021	0.19036	0.246027	0.336
glutamine family amino acid metabolic process	34	0.16322	0.073732	0.150824	0.24608	0.336
Toll-Interleukin receptor	11	0.114922	0.0218443	0.101419	0.227669	0.336
mesoderm morphogenesis	22	0.144255	0.0609808	0.132633	0.255646	0.337
ATP	132	0.202926	0.147221	0.196282	0.253829	0.338
transferase activity, transferring hexosyl groups	129	0.201404	0.143137	0.195463	0.262267	0.338
secretory pathway	168	0.20748	0.152262	0.201274	0.24469	0.34
Serine/threonine protein kinase	174	0.20834	0.155333	0.202499	0.253723	0.341
forebrain development	82	0.192503	0.129549	0.183413	0.244104	0.342
actin filament organization	47	0.1739	0.0969517	0.164306	0.230177	0.344
Protein kinase C, phorbol ester/diacylglycerol binding	54	0.177891	0.0954021	0.168455	0.262193	0.345
early endosome	28	0.15511	0.0758569	0.144526	0.235733	0.345
exopeptidase activity	91	0.193197	0.11952	0.186369	0.235244	0.348
microtubule-based process	152	0.205501	0.148922	0.19884	0.247629	0.349
Major facilitator superfamily MFS-1	59	0.179716	0.111508	0.170998	0.240181	0.35
BTB/POZ fold	132	0.201989	0.145375	0.196767	0.24304	0.351
mesoderm formation	22	0.144255	0.0651204	0.133427	0.227753	0.351
immune system development	216	0.210417	0.165056	0.205514	0.252604	0.352
lyase activity	147	0.2049	0.153276	0.198146	0.258833	0.352
Pyridoxal phosphate-dependent transferase, major region, subdomain 1	27	0.152755	0.0687367	0.141572	0.236612	0.352
negative regulation of cellular process	774	0.223207	0.192154	0.220444	0.241093	0.353
response to light stimulus	67	0.184504	0.110567	0.177437	0.249832	0.353
glycerol ether metabolic process	28	0.152694	0.0756211	0.142836	0.236727	0.353
glycerolipid metabolic process	28	0.152694	0.0756211	0.142836	0.236727	0.353
domain:SH3	95	0.194869	0.130685	0.187597	0.241889	0.355
protein ubiquitination	41	0.166997	0.0968522	0.15645	0.229258	0.355
Chromatin regulator	93	0.194371	0.135066	0.188345	0.240801	0.356
amine catabolic process	57	0.179018	0.101711	0.170404	0.241167	0.356
translation	390	0.218326	0.186467	0.214825	0.241417	0.357
enzyme activator activity	196	0.208706	0.1586	0.203255	0.249524	0.357
Golgi apparatus part	135	0.202067	0.137963	0.196636	0.259873	0.358
Ras	107	0.196397	0.14115	0.190634	0.244288	0.358
response to external stimulus	403	0.218427	0.178524	0.214738	0.246477	0.359
amino acid biosynthetic process	39	0.16752	0.0958331	0.157423	0.233345	0.359
Phosphotyrosine interaction region	30	0.157321	0.0744288	0.147382	0.226096	0.359
photoreceptor cell development	16	0.128958	0.0337351	0.117962	0.238889	0.359
response to endogenous stimulus	237	0.212107	0.168652	0.2077	0.245501	0.36
unfolded protein binding	63	0.180972	0.109357	0.17322	0.24349	0.36
cellular component assembly	333	0.216515	0.178402	0.212323	0.25401	0.361
nuclear pore	49	0.173429	0.107069	0.164909	0.241357	0.363
transferase activity, transferring one-carbon groups	146	0.203427	0.155081	0.197192	0.248047	0.364
regulation of hydrolase activity	117	0.198376	0.140004	0.192404	0.271855	0.366
respiratory tube development	56	0.1787	0.1033	0.171284	0.245932	0.366
fatty acid biosynthetic process	61	0.179826	0.115255	0.172561	0.238608	0.367
ubiquitin cycle	371	0.217414	0.174045	0.213656	0.243961	0.368
nitrogen compound metabolic process	352	0.217157	0.182314	0.213246	0.242511	0.368
gtpase activation	64	0.182405	0.114994	0.174495	0.245064	0.368
establishment of cellular localization	659	0.221697	0.193498	0.219044	0.258112	0.369
IPT	29	0.153261	0.0607808	0.144185	0.259662	0.369
manganese ion binding	122	0.199751	0.141097	0.194242	0.248625	0.37
secondary metabolic process	44	0.170033	0.0948247	0.162034	0.233231	0.37
lung development	56	0.1787	0.0963485	0.171577	0.234444	0.371
myristylation	24	0.146697	0.064278	0.137794	0.232301	0.371
small GTPase mediated signal transduction	344	0.216744	0.173651	0.213372	0.250874	0.372
Aspartic acid and asparagine hydroxylation site	81	0.19032	0.128343	0.183031	0.245442	0.372
thiol protease	96	0.193579	0.132006	0.187767	0.251401	0.374
Tetratricopeptide TPR-1	46	0.169708	0.0996043	0.162482	0.242165	0.374
protein dimerization activity	223	0.211357	0.16822	0.206757	0.251437	0.375
Focal adhesion	167	0.206423	0.154821	0.201719	0.24489	0.376
response to protein stimulus	56	0.177122	0.111117	0.171358	0.23604	0.377
locomotion	65	0.181997	0.120801	0.175697	0.244088	0.378
nitrogen compound catabolic process	57	0.179018	0.0969946	0.17243	0.236428	0.378
peptide transport	35	0.161924	0.0824817	0.153925	0.229206	0.378
protein secretion	31	0.154958	0.0663044	0.14629	0.257378	0.378
nucleotide-excision repair	22	0.141987	0.0477586	0.13324	0.237052	0.379
positive regulation of cellular biosynthetic process	36	0.161235	0.0776695	0.152852	0.25488	0.38
collagen	74	0.185499	0.113911	0.178049	0.254295	0.382
UDP-glycosyltransferase activity	81	0.188008	0.132053	0.182953	0.237618	0.383
Rho protein signal transduction	86	0.190925	0.11567	0.185506	0.241753	0.386
microtubule binding	49	0.17326	0.103308	0.167344	0.231522	0.387
S-adenosylmethionine-dependent methyltransferase activity	62	0.180146	0.108665	0.173736	0.264459	0.388
glycosidase	54	0.175594	0.0917503	0.168314	0.245148	0.388
acylglycerol metabolic process	27	0.150703	0.0597294	0.142672	0.246233	0.388
Manganese	115	0.197943	0.131323	0.192698	0.249226	0.389
exocytosis	64	0.180569	0.121449	0.174744	0.245648	0.39
coated vesicle membrane	50	0.171882	0.0935376	0.164983	0.237761	0.39
Immunoglobulin I-set	97	0.193597	0.126117	0.188853	0.248479	0.391
response to unfolded protein	56	0.177122	0.112017	0.171413	0.242586	0.393
golgi apparatus	361	0.216301	0.182542	0.213216	0.249633	0.394
TyrKc	99	0.192291	0.13235	0.187349	0.244462	0.395
organic acid biosynthetic process	65	0.182068	0.124908	0.176333	0.245058	0.396
Cell surface receptor IPT/TIG	28	0.152131	0.0682474	0.143677	0.229063	0.396
intracellular non-membrane-bound organelle	1208	0.224361	0.205665	0.222708	0.241305	0.397
tissue development	229	0.210564	0.169594	0.206864	0.247732	0.397
lipid metabolism	93	0.19271	0.135066	0.188345	0.240801	0.397
carboxylic acid biosynthetic process	65	0.182068	0.114432	0.176248	0.245392	0.397
SH3	169	0.206112	0.159575	0.202044	0.250434	0.398
BTB/POZ-like	131	0.200317	0.138268	0.195723	0.250108	0.398
vacuolar transport	18	0.130107	0.0381868	0.123464	0.222507	0.398
methyltransferase activity	143	0.202203	0.151877	0.198365	0.242667	0.4
Tyrosine protein kinase	95	0.193244	0.12734	0.188407	0.246899	0.4
nucleolus	117	0.196193	0.140265	0.192035	0.246516	0.401
RNA polymerase II transcription factor activity	65	0.180427	0.110853	0.174815	0.242562	0.401
pyridoxal phosphate	45	0.166672	0.0899521	0.160723	0.242117	0.401
eye morphogenesis	40	0.163092	0.0945725	0.157515	0.256497	0.401
transporter activity	1104	0.224456	0.201877	0.222878	0.240405	0.402
macromolecular complex assembly	293	0.213251	0.176416	0.210599	0.243755	0.402
Fatty acid metabolism	44	0.167514	0.0927446	0.16159	0.236899	0.403
secretion	245	0.211705	0.169648	0.208434	0.249332	0.404
small conjugating protein ligase activity	82	0.187356	0.132632	0.183273	0.235362	0.404
peroxisome	79	0.186374	0.131342	0.181642	0.25065	0.406
S_TK_X	50	0.172374	0.107045	0.167101	0.23139	0.406
protein modification by small protein conjugation	45	0.166841	0.0987436	0.161322	0.232806	0.406
microbody	79	0.186374	0.11827	0.181894	0.245724	0.408
amino acid catabolic process	48	0.170206	0.0942498	0.164859	0.241098	0.408
Protein kinase, C-terminal	50	0.172374	0.0935139	0.165952	0.243106	0.409
PAS	27	0.148315	0.0603666	0.142585	0.235842	0.409
DNA repair	176	0.205007	0.16018	0.201759	0.25839	0.41
mesoderm development	39	0.163029	0.0871156	0.157533	0.226663	0.411
polyol metabolic process	23	0.141166	0.0539992	0.134597	0.240185	0.412
Collagen triple helix repeat	68	0.182481	0.121819	0.177101	0.247525	0.414
carbohydrate metabolism	57	0.176641	0.109828	0.171765	0.241993	0.414
dendrite development	36	0.158816	0.088369	0.153235	0.234706	0.414
protein serine/threonine phosphatase activity	33	0.155315	0.0707811	0.149988	0.23753	0.414
anatomical structure formation	159	0.203097	0.154497	0.199658	0.246962	0.415
Golgi vesicle transport	68	0.181041	0.117754	0.176052	0.235647	0.415
endoplasmic reticulum	429	0.217531	0.18609	0.215622	0.242955	0.417
lipid raft	37	0.161201	0.0786074	0.156447	0.235964	0.417
autophagy	21	0.136701	0.0492788	0.130417	0.224335	0.417
translation elongation factor activity	24	0.144591	0.0607392	0.137372	0.250576	0.418
cellular localization	676	0.221936	0.19756	0.22028	0.247626	0.419
negative regulation of transcription, DNA-dependent	164	0.202799	0.154496	0.200315	0.249247	0.419
sperm-egg recognition	16	0.124952	0.0480979	0.11849	0.228557	0.42
localization	2413	0.226233	0.211847	0.225489	0.238716	0.421
hemopoietic or lymphoid organ development	204	0.208004	0.16291	0.204988	0.269152	0.421
coated vesicle	89	0.189316	0.127597	0.185209	0.252314	0.422
Coagulation factor 5/8 type, C-terminal	18	0.129449	0.0523318	0.122599	0.226072	0.423
intercellular junction	137	0.199658	0.141995	0.196934	0.260845	0.424
spindle	46	0.167945	0.0930157	0.163434	0.23308	0.424
epithelial cell differentiation	32	0.154686	0.0779934	0.149095	0.222699	0.425
Secreted	959	0.22312	0.19793	0.221904	0.243534	0.426
Src homology-3	161	0.202689	0.154279	0.200128	0.250055	0.426
nucleobase, nucleoside, nucleotide and nucleic acid transport	57	0.175718	0.116363	0.171631	0.241383	0.428
ear morphogenesis	49	0.17135	0.0934694	0.166793	0.244906	0.428
DNA metabolic process	530	0.219515	0.191462	0.217847	0.247209	0.429
vesicle coat	47	0.169427	0.102414	0.165419	0.240768	0.429
pyridoxal phosphate binding	41	0.164151	0.0898112	0.158879	0.246306	0.429
DNA replication	127	0.197309	0.143175	0.195137	0.250866	0.431
negative regulation of cell differentiation	71	0.182676	0.111863	0.179097	0.248569	0.431
biogenic amine biosynthetic process	18	0.129103	0.0470157	0.124287	0.234291	0.431
positive regulation of biological process	807	0.222352	0.196556	0.221103	0.250597	0.432
Nucleotide-binding, alpha-beta plait	130	0.19751	0.152063	0.19513	0.245896	0.435
modification-dependent macromolecule catabolic process	105	0.191997	0.143076	0.189281	0.246452	0.435
regulation of locomotion	58	0.176094	0.0963914	0.172954	0.239158	0.435
PDZ	116	0.195354	0.141865	0.193186	0.254667	0.437
fatty acid metabolic process	143	0.200861	0.151659	0.198252	0.249223	0.438
porin activity	26	0.145756	0.0702404	0.141626	0.221879	0.439
histone methyltransferase activity	22	0.136824	0.0655136	0.131818	0.223911	0.439
non-membrane-bound organelle	1208	0.224361	0.203837	0.223459	0.245087	0.44
Haloacid dehalogenase-like hydrolase	39	0.160627	0.0777952	0.156602	0.251118	0.441
actin filament	24	0.139755	0.0541149	0.13516	0.228179	0.442
regulation of cellular component organization and biogenesis	54	0.173617	0.104316	0.170071	0.245864	0.443
cell-cell recognition	17	0.12525	0.0381054	0.120484	0.214414	0.443
peroxisome	73	0.182383	0.120478	0.179853	0.248636	0.444
acid-amino acid ligase activity	91	0.189816	0.134072	0.187619	0.243753	0.445
protein processing	73	0.182342	0.124118	0.179033	0.249955	0.445
s-adenosyl-l-methionine	53	0.171768	0.0995123	0.168539	0.242158	0.445
response to DNA damage stimulus	213	0.208411	0.162278	0.206562	0.243619	0.446
regulation of cell motility	55	0.172118	0.0911859	0.168485	0.243918	0.446
angiogenesis	116	0.194397	0.143815	0.19237	0.262083	0.447
outer membrane	67	0.179377	0.120135	0.176897	0.24804	0.447
biomineral formation	78	0.183452	0.124267	0.181022	0.242739	0.448
transcription factor binding	195	0.205603	0.158442	0.203963	0.251166	0.449
biogenic amine metabolic process	58	0.174817	0.10762	0.171689	0.247035	0.45
Ras small GTPase, Rab type	55	0.172581	0.096598	0.169498	0.263211	0.45
aminoacyl-tRNA ligase activity	57	0.172946	0.106916	0.170515	0.240924	0.451
Plexin	28	0.147053	0.069958	0.144307	0.229146	0.451
EGF_CA	82	0.185413	0.132565	0.182841	0.252466	0.452
morphogenesis of embryonic epithelium	48	0.166483	0.0994082	0.163954	0.24254	0.452
splice variant	1627	0.224662	0.207555	0.224084	0.240713	0.453
ligase activity, forming carbon-oxygen bonds	57	0.172946	0.108467	0.169707	0.244926	0.454
protein methyltransferase activity	32	0.152907	0.0760183	0.150223	0.232506	0.454
extracellular matrix organization and biogenesis	49	0.167717	0.0960715	0.165509	0.245111	0.455
spermatogenesis	156	0.201462	0.13896	0.199725	0.249107	0.456
positive regulation of cell proliferation	152	0.201186	0.157262	0.199492	0.25732	0.456
fad	86	0.187442	0.130357	0.185514	0.241145	0.456
protein amino acid alkylation	27	0.145223	0.0680625	0.142645	0.226353	0.456
carbohydrate metabolic process	368	0.214404	0.176774	0.213205	0.24832	0.457
male gamete generation	156	0.201462	0.151139	0.199721	0.248831	0.457
zinc finger	63	0.176689	0.120007	0.174432	0.245746	0.457
ligase activity, forming aminoacyl-tRNA and related compounds	57	0.172946	0.117194	0.170421	0.244451	0.458
ion binding	3232	0.226111	0.213598	0.225841	0.236475	0.459
cell activation	193	0.204627	0.159208	0.20282	0.250651	0.459
modification-dependent protein catabolic process	105	0.191997	0.133772	0.190003	0.24703	0.459
protein amino acid methylation	27	0.145223	0.0630103	0.14161	0.23241	0.459
reproduction	332	0.214018	0.178883	0.212799	0.243892	0.46
monosaccharide metabolic process	130	0.197659	0.140829	0.196225	0.246217	0.46
endosome	91	0.188194	0.136384	0.186413	0.255614	0.461
EGF-like calcium-binding	80	0.184789	0.131047	0.182994	0.244037	0.461
SH3 domain	169	0.203447	0.159575	0.202044	0.250434	0.462
ligase activity, forming carbon-nitrogen bonds	123	0.195918	0.1396	0.19402	0.247152	0.463
amino acid and derivative metabolic process	276	0.211026	0.174442	0.20997	0.269947	0.465
positive regulation of cellular metabolic process	323	0.212756	0.17858	0.21185	0.247834	0.466
carbohydrate biosynthetic process	85	0.186179	0.134595	0.184432	0.240483	0.466
protein histidine kinase activity	22	0.135325	0.0477085	0.133073	0.23576	0.466
binding site:ATP	317	0.212364	0.173847	0.211444	0.248689	0.468
isomerase	99	0.189767	0.134941	0.188453	0.245479	0.468
endoplasmic reticulum membrane	86	0.185445	0.1277	0.184169	0.246255	0.468
flavoprotein	92	0.187231	0.129726	0.185781	0.248966	0.469
lipid transport	80	0.184973	0.128021	0.183226	0.248096	0.469
er-golgi transport	52	0.171097	0.0951316	0.169146	0.245683	0.47
axon ensheathment	30	0.146517	0.0712214	0.144955	0.227834	0.472
tRNA aminoacylation for protein translation	53	0.170137	0.105055	0.168845	0.239173	0.474
polysaccharide binding	76	0.181716	0.126116	0.180435	0.253708	0.475
amino acid activation	53	0.170137	0.110838	0.168862	0.23787	0.475
ensheathment of neurons	30	0.146517	0.0791712	0.144508	0.224889	0.475
Zinc finger, PHD-type	69	0.17994	0.122984	0.178373	0.235902	0.476
di-, tri-valent inorganic cation transmembrane transporter activity	31	0.148056	0.0559132	0.14686	0.250909	0.477
lamellipodium	52	0.168716	0.0944245	0.167702	0.240073	0.478
tRNA aminoacylation	53	0.170137	0.0995123	0.168539	0.242158	0.479
alcohol metabolic process	244	0.209289	0.170954	0.208588	0.257218	0.48
hexose metabolic process	128	0.195914	0.142978	0.194937	0.252459	0.482
pattern binding	82	0.185185	0.126048	0.183971	0.236118	0.482
cellular polysaccharide biosynthetic process	21	0.132453	0.0552711	0.130397	0.211616	0.482
histone modification	38	0.157078	0.0824025	0.156307	0.230706	0.483
sulfur compound biosynthetic process	34	0.154302	0.0857136	0.153425	0.241039	0.483
endosome	151	0.199691	0.154121	0.199011	0.258707	0.484
post-translational protein modification	1115	0.22328	0.201019	0.222961	0.243075	0.485
sh2 domain	83	0.184412	0.119162	0.183741	0.252086	0.485
endoplasmic reticulum part	95	0.187804	0.134644	0.187133	0.241975	0.486
carbohydrate binding	237	0.207592	0.165342	0.207151	0.248237	0.487
skeletal development	147	0.19875	0.153276	0.198146	0.258833	0.487
protein biosynthesis	121	0.194196	0.144013	0.193514	0.262104	0.487
B cell activation	70	0.177824	0.107588	0.177398	0.255966	0.487
proto-oncogene	69	0.178007	0.114373	0.177069	0.239437	0.488
regulation of cytokine biosynthetic process	43	0.162201	0.0996215	0.161755	0.246399	0.488
cytokine production	82	0.182706	0.132869	0.182247	0.25509	0.49
regulation of cellular biosynthetic process	134	0.196102	0.143977	0.195657	0.254332	0.491
positive regulation of cell differentiation	49	0.165718	0.0901942	0.165054	0.239605	0.493
nuclear envelope-endoplasmic reticulum network	90	0.186863	0.132979	0.186489	0.237978	0.494
ossification	77	0.181499	0.128508	0.181265	0.250167	0.495
mutagenesis site	340	0.212279	0.178725	0.212122	0.244612	0.496
proteolysis involved in cellular protein catabolic process	108	0.191659	0.13807	0.191374	0.258995	0.496
Tetratricopeptide-like helical	74	0.179801	0.126283	0.179679	0.245881	0.497
myelination	28	0.141846	0.0673727	0.141634	0.222594	0.497
cellular protein catabolic process	110	0.191031	0.135199	0.190932	0.246955	0.498
cytokine metabolic process	51	0.166858	0.107889	0.166702	0.244483	0.498
cofactor binding	166	0.201067	0.154296	0.201025	0.243261	0.499
aromatic amino acid family metabolic process	17	0.121506	0.0504705	0.121353	0.229269	0.499
polysaccharide biosynthetic process	22	0.131876	0.0473774	0.131885	0.22374	0.501
ubiquitin-dependent protein catabolic process	104	0.190948	0.136411	0.191071	0.246519	0.502
tight junction	64	0.174921	0.113216	0.175056	0.25317	0.502
catecholamine metabolic process	24	0.137093	0.0592893	0.137249	0.226917	0.503
cytokine biosynthetic process	51	0.166858	0.103196	0.167217	0.242127	0.504
actin filament-based process	168	0.200575	0.155465	0.200923	0.249277	0.505
wide pore channel activity	43	0.160975	0.0893844	0.161266	0.230316	0.505
Zinc finger, NHR/GATA-type	34	0.149615	0.0740616	0.149971	0.24656	0.505
T cell differentiation in the thymus	22	0.134079	0.0537556	0.134208	0.221618	0.505
regulation of biosynthetic process	150	0.197531	0.152858	0.1978	0.246622	0.506
lymphocyte differentiation	88	0.184935	0.128726	0.185244	0.250353	0.506
embryonic limb morphogenesis	54	0.169147	0.108599	0.169632	0.238216	0.506
protein binding	4709	0.226351	0.218227	0.22643	0.235883	0.509
RAB	56	0.168675	0.101342	0.169489	0.231611	0.51
phosphoric ester hydrolase activity	277	0.209313	0.171494	0.209618	0.262113	0.512
glycosaminoglycan binding	71	0.177664	0.112612	0.178276	0.248388	0.513
regulation of pH	23	0.133088	0.0617498	0.134001	0.247932	0.513
negative regulation of transcription	226	0.205334	0.164794	0.205875	0.247243	0.514
positive regulation of metabolic process	345	0.212396	0.182134	0.212829	0.242729	0.515
phenol metabolic process	24	0.137093	0.0549174	0.138597	0.2222	0.515
biopolymer methylation	47	0.161389	0.091605	0.162496	0.237524	0.516
PMP-22/EMP/MP20/Claudin	36	0.152954	0.0855094	0.154149	0.237593	0.516
negative regulation of developmental process	86	0.184534	0.129272	0.185324	0.239171	0.517
PHD	73	0.17889	0.120478	0.179853	0.248636	0.517
detection of stimulus during sensory perception	40	0.157591	0.092419	0.158607	0.238838	0.517
Zinc finger, nuclear hormone receptor-type	34	0.150338	0.0672756	0.151323	0.243519	0.517
oxidoreductase activity, acting on the CH-NH group of donors	24	0.134375	0.065439	0.135811	0.246186	0.52
coenzyme binding	116	0.190491	0.14592	0.191963	0.244144	0.521
chromatin binding	98	0.187133	0.127047	0.187876	0.251839	0.522
rRNA metabolic process	56	0.169575	0.111585	0.170449	0.23739	0.522
amino sugar metabolic process	28	0.14101	0.0705941	0.142477	0.230576	0.523
kinase binding	63	0.173637	0.11283	0.174525	0.253762	0.524
nuclear membrane	62	0.17246	0.113569	0.17351	0.237716	0.525
regulation of actin filament length	31	0.145343	0.0723649	0.147225	0.221839	0.525
embryonic appendage morphogenesis	54	0.169147	0.0992749	0.170986	0.244533	0.526
vitamin binding	98	0.186931	0.130927	0.188018	0.245344	0.528
regulation of organelle organization and biogenesis	33	0.148907	0.0767181	0.151374	0.236028	0.53
cell-cell adherens junction	24	0.134343	0.0687918	0.137409	0.222282	0.53
chromosomal part	218	0.204817	0.162411	0.20589	0.245566	0.531
translocation	41	0.157125	0.0898112	0.158879	0.246306	0.532
glucose metabolic process	90	0.182709	0.130198	0.184743	0.247392	0.533
cytokine binding	74	0.177925	0.122369	0.179438	0.243543	0.533
perinuclear region of cytoplasm	45	0.161179	0.0970354	0.163057	0.231181	0.533
transferase activity, transferring nitrogenous groups	32	0.146238	0.0757217	0.148608	0.222588	0.533
transferase activity, transferring glycosyl groups	182	0.200638	0.15548	0.201541	0.248865	0.534
nuclear membrane part	60	0.170676	0.107538	0.172464	0.23931	0.536
covalent chromatin modification	40	0.156283	0.092419	0.158607	0.238838	0.536
WD40 repeat	176	0.200221	0.146545	0.20165	0.244857	0.537
Variant SH3	46	0.161442	0.0823301	0.163713	0.252301	0.537
GTP-binding	242	0.206304	0.169687	0.207858	0.264026	0.54
DNA damage	124	0.192939	0.144743	0.194234	0.246203	0.54
dioxygenase activity	53	0.16439	0.0944204	0.166805	0.237652	0.54
carbohydrate transmembrane transporter activity	41	0.154368	0.0968522	0.15645	0.229258	0.54
protein folding	166	0.199494	0.15634	0.201147	0.256991	0.542
establishment and/or maintenance of chromatin architecture	211	0.205151	0.162349	0.206506	0.243966	0.543
regulation of cytoskeleton organization and biogenesis	33	0.148907	0.0805465	0.151278	0.22982	0.543
cellular component disassembly	23	0.133802	0.0657141	0.136512	0.229723	0.543
protein transporter activity	116	0.190176	0.138889	0.192353	0.246197	0.545
Steroid hormone receptor	35	0.149765	0.0809869	0.152659	0.226865	0.545
cholesterol metabolic process	60	0.169922	0.114655	0.172455	0.238915	0.547
negative regulation of nucleobase, nucleoside, nucleotide and nucleic acid metabolic process	241	0.206044	0.166927	0.207565	0.255069	0.549
DNA repair	116	0.189168	0.14592	0.191963	0.244144	0.549
intracellular protein transport across a membrane	40	0.155624	0.0721697	0.158111	0.249191	0.549
Zinc finger, RING-type	180	0.20147	0.154827	0.203349	0.246566	0.551
Cell cycle	103	0.18727	0.138147	0.189665	0.240963	0.552
rRNA processing	55	0.167548	0.0975679	0.170101	0.240227	0.552
ribosome biogenesis	30	0.141843	0.0774629	0.145133	0.230802	0.552
DNA packaging	218	0.20499	0.162283	0.206618	0.253414	0.555
protein-RNA complex assembly	77	0.177527	0.131163	0.180311	0.24053	0.556
regulation of actin cytoskeleton organization and biogenesis	31	0.145343	0.0819922	0.148671	0.237902	0.556
Guanylate kinase/L-type calcium channel region	21	0.126397	0.0480459	0.130644	0.220203	0.556
Peptidase C1A, papain C-terminal	18	0.120816	0.0414382	0.125267	0.234085	0.556
TPR repeat	76	0.177991	0.123728	0.181236	0.240793	0.557
transaminase activity	29	0.141105	0.0711645	0.145168	0.225553	0.557
ligase	179	0.200894	0.159272	0.202995	0.262556	0.558
Keratin, type I	37	0.149788	0.0869024	0.153859	0.235618	0.558
pore complex	54	0.166973	0.106352	0.169731	0.247038	0.559
positive regulation of cytokine biosynthetic process	25	0.133709	0.0505676	0.137766	0.242073	0.559
extracellular matrix	242	0.205657	0.166397	0.207984	0.250506	0.56
Tetratricopeptide region	63	0.170975	0.109165	0.17405	0.261619	0.56
sugar transmembrane transporter activity	40	0.152414	0.0801787	0.1561	0.248971	0.56
protein homooligomerization	31	0.144875	0.0819922	0.148671	0.237902	0.56
actin cytoskeleton organization and biogenesis	158	0.197093	0.153511	0.199826	0.252521	0.561
synaptic vesicle	27	0.138229	0.05816	0.142664	0.247181	0.562
cartilage development	43	0.156577	0.0994576	0.160466	0.236528	0.564
DNA-directed RNA polymerase II, holoenzyme	40	0.154064	0.0947855	0.158146	0.240616	0.564
somitogenesis	28	0.138285	0.0656215	0.141442	0.243799	0.564
sphingoid metabolic process	24	0.131039	0.0537716	0.136113	0.224055	0.564
oxidoreductase activity, acting on single donors with incorporation of molecular oxygen	54	0.164263	0.10028	0.167293	0.244031	0.566
kelch repeat	42	0.154566	0.0872921	0.158133	0.246603	0.567
Golgi apparatus	505	0.21585	0.191056	0.217609	0.247517	0.569
WD40	195	0.2022	0.161553	0.204456	0.247743	0.569
positive regulation of transcription from RNA polymerase II promoter	171	0.198718	0.145609	0.201298	0.244986	0.569
isomerase activity	132	0.192155	0.152642	0.195293	0.27197	0.569
Kelch	56	0.165947	0.114339	0.169644	0.242491	0.569
Bromodomain	28	0.139135	0.0700956	0.143493	0.227708	0.569
PIRSF001710:Ras-related protein Rab	57	0.166318	0.103541	0.170192	0.233789	0.57
Nuclear hormone receptor, ligand-binding	36	0.149622	0.0855094	0.154149	0.237593	0.57
regulation of transcription from RNA polymerase II promoter	318	0.209188	0.17637	0.211369	0.246283	0.571
protein phosphatase	94	0.184323	0.134523	0.187718	0.241103	0.571
ER to Golgi vesicle-mediated transport	48	0.160628	0.0942498	0.164859	0.241098	0.571
positive regulation of cellular process	707	0.219021	0.19647	0.220233	0.245336	0.572
macromolecular complex	1706	0.223147	0.208886	0.224118	0.240075	0.573
ceramide metabolic process	23	0.130889	0.0615834	0.137037	0.234029	0.573
ligase activity	271	0.207598	0.174577	0.209759	0.247155	0.574
response to radiation	87	0.181273	0.103652	0.184611	0.245385	0.574
Semaphorin/CD100 antigen	30	0.140583	0.0693953	0.146105	0.237102	0.574
nuclear envelope	106	0.186687	0.131911	0.190197	0.245978	0.575
protein kinase binding	56	0.167044	0.111585	0.170449	0.23739	0.575
methylation	50	0.162106	0.101673	0.16668	0.235739	0.575
membrane protein	41	0.153925	0.0833577	0.159129	0.245996	0.575
lyase	106	0.187227	0.13799	0.191239	0.25768	0.578
ear development	63	0.170937	0.11283	0.174525	0.253762	0.58
regulation of action potential	39	0.151843	0.0871156	0.157533	0.226663	0.58
sensory organ development	147	0.195591	0.157343	0.198275	0.246003	0.581
cyclin	64	0.171026	0.109584	0.175119	0.239263	0.581
glutamine metabolic process	17	0.116234	0.0437956	0.122041	0.211353	0.581
cytoskeletal protein binding	326	0.209465	0.174117	0.211769	0.247497	0.582
Immunoglobulin subtype 2	143	0.194631	0.147852	0.198521	0.245238	0.582
RING	191	0.200718	0.16217	0.20362	0.260674	0.583
Transcription regulation	1004	0.220624	0.203565	0.221816	0.244246	0.587
protein amino acid phosphorylation	513	0.215248	0.186244	0.217282	0.245904	0.588
mammary gland development	17	0.113528	0.0310314	0.12008	0.239606	0.588
S_TKc	290	0.207821	0.163351	0.210265	0.242188	0.589
taxis	99	0.183975	0.137442	0.18803	0.24684	0.589
Nucleotidyltransferase	65	0.170505	0.119934	0.175323	0.252354	0.589
extrinsic to plasma membrane	45	0.156733	0.0826983	0.162599	0.25252	0.589
morphogenesis of an epithelium	91	0.181359	0.126562	0.186213	0.245319	0.59
amine transport	61	0.168634	0.107949	0.173171	0.239823	0.59
positive regulation of translation	32	0.144717	0.0802491	0.150414	0.23941	0.59
oxidoreductase activity, acting on single donors with incorporation of molecular oxygen, incorporation of two atoms of oxygen	53	0.16439	0.108467	0.169762	0.234232	0.591
Sema	30	0.140583	0.0633629	0.146606	0.234069	0.591
ubiquitin ligase complex	39	0.1523	0.0761849	0.158086	0.240269	0.592
Tumor Necrosis Factor	6	0.0686209	-0.010949	0.0772653	0.19863	0.593
positive regulation of transcription, DNA-dependent	217	0.202208	0.163269	0.205882	0.249283	0.594
zinc finger region:RING-type	76	0.176569	0.129549	0.180961	0.242097	0.594
metal ion binding	3157	0.224944	0.213285	0.225913	0.236187	0.595
intracellular transport	538	0.215325	0.188758	0.217682	0.24855	0.596
chemotaxis	99	0.183975	0.14098	0.18874	0.266958	0.596
sugar:hydrogen ion symporter activity	39	0.150886	0.0871156	0.157533	0.226663	0.596
O-acyltransferase activity	30	0.139956	0.0739798	0.146524	0.23912	0.597
Direct protein sequencing	889	0.220018	0.198036	0.221944	0.244214	0.598
Marvel	20	0.120383	0.0491916	0.12669	0.224472	0.598
endomembrane system	317	0.208384	0.173847	0.211444	0.248689	0.599
ligand-dependent nuclear receptor activity	48	0.158971	0.105181	0.164346	0.243662	0.602
wound healing	78	0.176271	0.12151	0.182087	0.244176	0.604
regulation of actin polymerization and/or depolymerization	30	0.141233	0.0686102	0.147718	0.25369	0.604
regulation of cellular component size	32	0.143805	0.0697631	0.150266	0.245574	0.606
embryonic morphogenesis	155	0.196033	0.15106	0.199897	0.245148	0.607
superoxide metabolic process	21	0.120452	0.040406	0.129702	0.22831	0.608
apoptotic program	53	0.162203	0.0996051	0.169354	0.239872	0.609
integral to organelle membrane	48	0.158164	0.101113	0.164834	0.248473	0.612
positive regulation of T cell proliferation	20	0.120906	0.0510399	0.128779	0.213648	0.612
regulation of cell adhesion	41	0.152073	0.0933016	0.15851	0.238428	0.613
ubl conjugation	251	0.205358	0.170393	0.208551	0.249607	0.614
mitochondrial lumen	59	0.16532	0.108634	0.171314	0.246133	0.614
Kelch repeat type 1	42	0.151992	0.0872921	0.158133	0.246603	0.614
cytosol	348	0.210167	0.180174	0.213067	0.243212	0.615
EGF, extracellular	57	0.164832	0.116363	0.171631	0.241383	0.616
amino acid transport	50	0.159562	0.0954617	0.166453	0.246715	0.616
amino acid metabolic process	217	0.202363	0.165462	0.206336	0.248717	0.618
regulation of transferase activity	137	0.191754	0.150165	0.196493	0.246251	0.618
SET	37	0.147203	0.0842724	0.154965	0.234703	0.619
RICIN	27	0.133437	0.0639412	0.142472	0.225953	0.619
TPR	68	0.171949	0.0994663	0.177683	0.238251	0.62
mediator complex	15	0.105986	0.0268307	0.115553	0.236557	0.621
actin-binding	143	0.193985	0.151877	0.198365	0.242667	0.625
B cell receptor signaling pathway	59	0.166479	0.114066	0.173169	0.238319	0.625
developmental growth	51	0.160661	0.095784	0.167468	0.242627	0.625
proteinaceous extracellular matrix	236	0.203163	0.169888	0.207264	0.250155	0.627
steroid hormone receptor activity	47	0.156857	0.0905254	0.165058	0.245904	0.629
induction of apoptosis by extracellular signals	18	0.113636	0.0392656	0.123664	0.232635	0.63
positive regulation of transcription	264	0.205548	0.173326	0.209737	0.249682	0.631
mitochondrial matrix	59	0.16532	0.112621	0.172511	0.234679	0.631
carboxylic acid transport	64	0.168314	0.107864	0.174469	0.260956	0.632
Nuclear hormone receptor, ligand-binding, core	35	0.145891	0.0849832	0.154309	0.238036	0.632
CYCLIN	32	0.140971	0.0697631	0.150266	0.245574	0.634
regulation of catalytic activity	278	0.205525	0.173229	0.209813	0.247636	0.635
short sequence motif:Nuclear localization signal	164	0.195055	0.146672	0.20057	0.247247	0.635
cytokinesis	29	0.13485	0.0697886	0.145832	0.226013	0.636
Ricin B lectin	27	0.133437	0.0643978	0.142343	0.224914	0.637
ADP-ribosylation factor	21	0.121414	0.0487018	0.13176	0.224084	0.637
cell cycle arrest	51	0.159278	0.108871	0.167422	0.238727	0.638
phosphoric monoester hydrolase activity	218	0.201292	0.170681	0.20592	0.243887	0.64
nuclear pore complex	23	0.124209	0.0493092	0.134342	0.225892	0.64
ATPase activity	294	0.206753	0.17711	0.211177	0.2462	0.642
cell cortex	46	0.154666	0.0934226	0.163777	0.230773	0.643
Adenylyl cyclase class-3/4/guanylyl cyclase	19	0.116915	0.043492	0.127792	0.22752	0.643
lymphocyte activation	166	0.194703	0.158265	0.200649	0.265278	0.644
in utero embryonic development	100	0.182888	0.134432	0.189275	0.25193	0.645
metal ion-binding site:Zinc (catalytic)	83	0.175815	0.100235	0.183462	0.245493	0.647
regulation of cell migration	48	0.156189	0.104876	0.1651	0.234652	0.647
organic acid transport	65	0.167688	0.115931	0.175268	0.234772	0.649
carboxylic acid metabolic process	436	0.211696	0.18825	0.215029	0.245506	0.65
lipid degradation	60	0.164942	0.113336	0.173062	0.235458	0.65
Cyclin-related	31	0.138739	0.0778969	0.148823	0.229901	0.651
meiotic cell cycle	60	0.164002	0.102319	0.1725	0.23335	0.652
M phase of meiotic cell cycle	60	0.164002	0.106672	0.17287	0.263021	0.652
heparin binding	55	0.161366	0.111389	0.170773	0.242653	0.652
kinase	589	0.214326	0.192806	0.217725	0.256346	0.654
regulation of kinase activity	131	0.188738	0.150685	0.195191	0.245807	0.654
single fertilization	34	0.14159	0.0672756	0.151323	0.243519	0.655
lipoprotein biosynthetic process	52	0.159278	0.11093	0.167846	0.232187	0.658
cellular biosynthetic process	795	0.217809	0.198123	0.221289	0.243475	0.659
meiosis	60	0.164002	0.104231	0.173588	0.249871	0.661
coated pit	46	0.154011	0.0919715	0.163179	0.241427	0.663
organic acid metabolic process	437	0.211454	0.181906	0.215423	0.251042	0.665
nucleotide phosphate-binding region:GTP	180	0.196552	0.163044	0.203099	0.242685	0.666
alpha-beta T cell differentiation	20	0.116215	0.0491023	0.12941	0.247581	0.666
organelle organization and biogenesis	928	0.218765	0.200047	0.221362	0.243403	0.667
positive regulation of nucleobase, nucleoside, nucleotide and nucleic acid metabolic process	271	0.20514	0.176593	0.210508	0.249604	0.667
cell projection biogenesis	55	0.160445	0.096598	0.169498	0.263211	0.667
Thrombospondin, type I	42	0.150591	0.0966749	0.160741	0.235776	0.667
dna recombination	25	0.126364	0.0563234	0.138291	0.226723	0.667
phototransduction	21	0.117919	0.0635842	0.130266	0.232574	0.667
GTP binding	294	0.205541	0.163935	0.210507	0.243107	0.668
CUB	41	0.147284	0.0851454	0.158271	0.235224	0.668
negative regulation of signal transduction	85	0.17554	0.134827	0.184278	0.249505	0.67
neural tube development	40	0.148419	0.0751903	0.158625	0.249668	0.672
mitochondrion organization and biogenesis	63	0.164327	0.116676	0.173124	0.239819	0.673
Myb, DNA-binding	26	0.129088	0.0563892	0.140595	0.253326	0.673
regulation of cyclin-dependent protein kinase activity	16	0.107337	0.0460287	0.120401	0.225118	0.674
rrna processing	40	0.147024	0.092419	0.158607	0.238838	0.675
positive regulation of T cell activation	35	0.141311	0.0819185	0.153797	0.228158	0.675
establishment of localization	2150	0.223052	0.211115	0.225196	0.239951	0.676
peptidyl-amino acid modification	100	0.179643	0.141657	0.187522	0.241468	0.676
Tumour necrosis factor-like	29	0.132854	0.0664425	0.145152	0.238106	0.677
cell	10511	0.226442	0.222328	0.227159	0.232352	0.678
cyclin-dependent protein kinase activity	29	0.133726	0.0759547	0.145029	0.240915	0.678
cell division	168	0.194482	0.154491	0.201846	0.245678	0.679
lipoprotein metabolic process	69	0.167554	0.107967	0.177009	0.255241	0.679
adherens junction	60	0.160748	0.108159	0.171707	0.242217	0.679
protein kinase activity	494	0.212965	0.187346	0.21735	0.243507	0.68
negative regulation of programmed cell death	149	0.191408	0.142026	0.198399	0.246512	0.68
Winged helix repressor DNA-binding	100	0.181378	0.135787	0.189175	0.241435	0.681
fertilization	38	0.143756	0.0734307	0.1552	0.229313	0.683
fatty acid biosynthesis	38	0.144861	0.0778855	0.157833	0.237146	0.684
Thioredoxin domain	8	0.0739645	0.00900139	0.0895725	0.2356	0.684
sterol metabolic process	67	0.167766	0.0988381	0.177037	0.238691	0.685
regulation of a molecular function	319	0.20681	0.178402	0.212001	0.248384	0.686
lysosome	105	0.181318	0.133536	0.189664	0.261746	0.686
membrane coat	56	0.159073	0.109984	0.168603	0.239569	0.688
protein targeting	186	0.196727	0.163081	0.203433	0.244112	0.689
extracellular matrix	157	0.193291	0.150664	0.200012	0.24422	0.689
cell part	10511	0.226442	0.222543	0.22715	0.231883	0.69
Ras-association	38	0.143834	0.08779	0.155482	0.257986	0.69
Protein kinase, core	273	0.203721	0.173828	0.209429	0.249372	0.692
monocarboxylic acid metabolic process	198	0.197413	0.155301	0.203929	0.244367	0.692
prenylation	133	0.187884	0.138834	0.196425	0.259987	0.692
sterol biosynthetic process	29	0.133345	0.0728398	0.145876	0.228316	0.692
aminopeptidase	23	0.11984	0.0604722	0.135222	0.236227	0.693
cellular macromolecule catabolic process	205	0.198688	0.1685	0.205133	0.254472	0.694
T cell differentiation	59	0.161368	0.117421	0.171497	0.242321	0.695
transcription from RNA polymerase II promoter	353	0.207783	0.180395	0.213111	0.250174	0.696
pattern specification process	195	0.196555	0.156671	0.203965	0.250693	0.698
heparin-binding	44	0.150092	0.0879298	0.161732	0.227556	0.698
Cyclin	30	0.132375	0.0765043	0.146882	0.233029	0.698
synaptic vesicle transport	20	0.114298	0.0376227	0.129436	0.239326	0.698
gene expression	2492	0.223022	0.21184	0.225036	0.237047	0.699
gastrulation	49	0.154479	0.0972803	0.165886	0.242398	0.699
cell-substrate adherens junction	30	0.132696	0.0553815	0.147105	0.238143	0.699
ATPase activity, coupled	248	0.201447	0.165824	0.208001	0.253553	0.701
transcription repressor activity	138	0.189752	0.145174	0.197114	0.242372	0.701
Integrin	62	0.161795	0.115935	0.173901	0.245324	0.701
chordate embryonic development	174	0.193094	0.161277	0.201556	0.263109	0.702
GPI anchor metabolic process	23	0.119094	0.0597896	0.133954	0.229753	0.702
leukocyte activation	177	0.194504	0.154063	0.202392	0.250254	0.704
Cyclin, N-terminal	25	0.122567	0.063623	0.137468	0.231046	0.704
actin binding	220	0.199056	0.165853	0.206558	0.24727	0.706
SH2 motif	81	0.172443	0.125143	0.183512	0.235972	0.706
hormone metabolic process	69	0.166644	0.11718	0.177806	0.248379	0.706
RNA binding	502	0.211861	0.188266	0.216785	0.254028	0.707
regulation of protein kinase activity	125	0.185475	0.13517	0.194886	0.243235	0.709
coated membrane	56	0.159073	0.106232	0.170821	0.247033	0.709
regulation of cell morphogenesis	44	0.147758	0.0886668	0.159866	0.243026	0.709
positive regulation of I-kappaB kinase/NF-kappaB cascade	32	0.135522	0.0769073	0.148635	0.232546	0.711
actin polymerization and/or depolymerization	39	0.142285	0.086069	0.156929	0.234648	0.712
rna-binding	328	0.205939	0.178302	0.211908	0.247853	0.713
activator	297	0.204046	0.176558	0.210592	0.242765	0.714
negative regulation of apoptosis	146	0.189405	0.152631	0.198323	0.244707	0.714
SH2	82	0.172133	0.12813	0.183614	0.243024	0.714
Major facilitator superfamily	66	0.165046	0.112052	0.176681	0.230628	0.714
PSI	42	0.145793	0.0844189	0.15976	0.235043	0.715
B cell differentiation	33	0.134183	0.0786487	0.148838	0.231104	0.715
acetylglucosaminyltransferase activity	31	0.133444	0.0739598	0.147377	0.226519	0.717
RNA recognition motif, RNP-1	133	0.1863	0.152972	0.195439	0.246871	0.719
regulation of MAP kinase activity	46	0.150026	0.103186	0.162689	0.233409	0.719
regulation of anatomical structure morphogenesis	44	0.147758	0.0986074	0.162058	0.231621	0.721
Allosteric enzyme	27	0.125496	0.0707799	0.142638	0.216514	0.722
domain:Protein kinase	289	0.204251	0.175119	0.210121	0.249796	0.724
intrinsic to organelle membrane	58	0.15885	0.113036	0.172356	0.242745	0.725
chromosome segregation	48	0.150889	0.0918223	0.165182	0.25464	0.725
regulation of cell shape	44	0.147758	0.0928638	0.163036	0.232778	0.725
embryonic development ending in birth or egg hatching	176	0.193546	0.153726	0.201816	0.257508	0.726
coagulation	53	0.154279	0.0944204	0.166805	0.237652	0.726
exonuclease activity, active with either ribo- or deoxyribonucleic acids and producing 5'-phosphomonoesters	17	0.10292	0.0326003	0.121954	0.215778	0.728
Serine/threonine protein kinase, active site	208	0.197634	0.168828	0.205495	0.25257	0.729
protein catabolic process	157	0.19009	0.150388	0.199698	0.248359	0.729
metalloendopeptidase activity	98	0.178014	0.135546	0.188019	0.241226	0.729
transcription factor	34	0.135927	0.0801459	0.15213	0.231787	0.729
transferase activity, transferring pentosyl groups	33	0.133208	0.0830903	0.148153	0.230098	0.729
trna processing	29	0.130017	0.0728398	0.145876	0.228316	0.729
4 iron, 4 sulfur cluster binding	18	0.107023	0.0470157	0.124287	0.234291	0.729
mitotic cell cycle	211	0.196791	0.163578	0.205349	0.248256	0.731
phosphoinositide metabolic process	46	0.149869	0.0934226	0.163777	0.230773	0.731
Laminin G, Thrombospondin-type, N-terminal	15	0.0989878	0.0385347	0.116143	0.203831	0.731
biosynthetic process	1066	0.218618	0.200174	0.222738	0.240367	0.732
hydrolase activity, acting on glycosyl bonds	112	0.181076	0.136589	0.191282	0.252304	0.733
nucleotide binding	68	0.164139	0.111305	0.176973	0.238917	0.736
Plexin/semaphorin/integrin	42	0.145793	0.0832296	0.160788	0.237392	0.736
blood coagulation	52	0.154035	0.106724	0.167765	0.239851	0.737
PX	43	0.14485	0.0935444	0.161666	0.232263	0.737
cytoskeleton organization and biogenesis	403	0.207942	0.175945	0.214507	0.24512	0.738
transcription corepressor activity	50	0.15201	0.103549	0.167522	0.23172	0.738
hydrolase activity, acting on ester bonds	566	0.212784	0.192446	0.218339	0.246312	0.739
cell-matrix junction	34	0.134199	0.0724191	0.151016	0.231531	0.739
embryonic development	362	0.206924	0.18196	0.213588	0.243396	0.74
regulation of I-kappaB kinase/NF-kappaB cascade	34	0.135373	0.0775766	0.151877	0.229703	0.742
tissue morphogenesis	52	0.1535	0.0959547	0.168526	0.236976	0.747
hemostasis	55	0.154072	0.097337	0.169425	0.24173	0.748
Phox-like	43	0.14485	0.0803033	0.160445	0.247847	0.748
AAA ATPase, subdomain	22	0.113782	0.0551148	0.133276	0.264619	0.748
Peptidase, cysteine peptidase active site	38	0.139855	0.0778855	0.157833	0.237146	0.749
negative regulation of progression through cell cycle	123	0.183241	0.141262	0.193692	0.252632	0.751
regulation of translation	123	0.181292	0.150339	0.19349	0.246067	0.751
transport	2093	0.221914	0.209889	0.2252	0.236765	0.753
IGc2	149	0.18843	0.142317	0.198566	0.243443	0.753
growth factor	103	0.17611	0.119972	0.188926	0.24438	0.753
duplication	87	0.169974	0.130517	0.183719	0.250005	0.753
steroid metabolic process	119	0.182186	0.130046	0.193057	0.245072	0.754
translation regulation	32	0.131908	0.0697631	0.150266	0.245574	0.755
RRM	156	0.188576	0.151139	0.199721	0.248831	0.756
hydrolase activity, hydrolyzing O-glycosyl compounds	93	0.173373	0.11143	0.186331	0.242942	0.756
lipid synthesis	79	0.16881	0.106268	0.182955	0.239767	0.756
oxygen and reactive oxygen species metabolic process	34	0.133715	0.0857136	0.153425	0.241039	0.756
guanyl nucleotide binding	302	0.203088	0.176098	0.211429	0.243618	0.759
P-loop	69	0.163481	0.118598	0.177314	0.251493	0.759
cytoskeletal part	443	0.208725	0.181884	0.215823	0.24578	0.762
anterior/posterior pattern formation	82	0.168705	0.116277	0.183257	0.252245	0.762
lysosome	156	0.188678	0.157945	0.200113	0.256513	0.763
microtubule	116	0.180208	0.142473	0.193005	0.244241	0.763
Kelch-type beta propeller	37	0.13812	0.0839544	0.15494	0.239082	0.763
lytic vacuole	156	0.188678	0.157216	0.199183	0.261604	0.764
aromatic compound metabolic process	105	0.177192	0.137418	0.190468	0.258145	0.764
regulation of T cell proliferation	33	0.131944	0.0708625	0.151572	0.234831	0.764
cholesterol biosynthetic process	22	0.114733	0.0523441	0.132982	0.230194	0.764
GTPase activity	119	0.180882	0.13471	0.193035	0.250249	0.767
protein amino acid lipidation	49	0.149046	0.091767	0.165988	0.255709	0.767
tumor necrosis factor receptor superfamily binding	9	0.0716609	0.0141808	0.0934361	0.2268	0.767
transcription factor complex	321	0.203194	0.171157	0.211829	0.242352	0.77
tumor necrosis factor receptor binding	9	0.0716609	0.0133771	0.0944517	0.232241	0.77
transferase activity	1503	0.219944	0.207599	0.224114	0.239548	0.772
carboxypeptidase activity	44	0.143477	0.0935726	0.162459	0.2308	0.774
regulation of JNK cascade	17	0.0986097	0.036819	0.121158	0.23254	0.774
macromolecule localization	673	0.213733	0.19492	0.220009	0.241403	0.775
Guanylate kinase	18	0.102502	0.0447616	0.124182	0.228488	0.775
T cell activation	109	0.177379	0.142313	0.190727	0.24339	0.776
phosphotransferase activity, alcohol group as acceptor	589	0.21183	0.191562	0.218866	0.251667	0.778
cell division	211	0.195029	0.163578	0.205349	0.248256	0.778
metalloprotease	125	0.181729	0.140533	0.194625	0.252295	0.778
transcription coactivator activity	69	0.162765	0.0997247	0.178194	0.239563	0.78
sphingolipid metabolic process	41	0.140771	0.0974392	0.15795	0.235698	0.78
protein serine/threonine kinase activity	399	0.206923	0.183948	0.214916	0.248908	0.781
electron carrier activity	161	0.189961	0.158327	0.20055	0.249532	0.781
mitosis	107	0.17629	0.13471	0.190882	0.250559	0.782
endocytosis	72	0.163791	0.121273	0.17899	0.245925	0.782
positive regulation of protein metabolic process	63	0.156202	0.109357	0.17322	0.24349	0.782
tRNA metabolic process	94	0.171813	0.132953	0.18622	0.240466	0.783
acyltransferase activity	154	0.187151	0.158313	0.200012	0.255403	0.785
microtubule	158	0.186898	0.151688	0.199933	0.249307	0.785
Peptidase M, neutral zinc metallopeptidases, zinc-binding site	75	0.164288	0.106866	0.180592	0.242842	0.786
hexose transport	26	0.117671	0.0649577	0.138886	0.234686	0.786
histone methylation	13	0.0864653	0.0412458	0.109481	0.230011	0.786
RNA splicing	151	0.186718	0.148676	0.198402	0.247043	0.788
microtubule cytoskeleton	270	0.20054	0.172047	0.209339	0.247396	0.789
heat shock protein binding	52	0.150442	0.0951316	0.169146	0.245683	0.791
RhoGAP	36	0.134488	0.084731	0.153791	0.227523	0.792
protein localization	650	0.212495	0.192045	0.2196	0.252851	0.795
detection of visible light	23	0.111867	0.0539992	0.134597	0.240185	0.795
lipid biosynthetic process	216	0.194858	0.167697	0.20612	0.265234	0.797
N-acyltransferase activity	55	0.152597	0.107374	0.169363	0.247474	0.797
bZIP transcription factor, bZIP-1	20	0.105394	0.037834	0.12849	0.219718	0.798
centromere	31	0.126905	0.0772617	0.147553	0.230669	0.799
intrinsic to Golgi membrane	15	0.0915136	0.0448344	0.115441	0.228095	0.8
Zinc finger, FYVE-type	33	0.128364	0.0803416	0.151629	0.239309	0.803
alpha-beta T cell activation	29	0.121721	0.0636758	0.144381	0.23696	0.803
protein complex	1398	0.219068	0.202363	0.22394	0.240737	0.804
mrna processing	164	0.188603	0.160211	0.200316	0.253058	0.804
transferase activity, transferring groups other than amino-acyl groups	156	0.187617	0.154444	0.199759	0.266427	0.805
detection of light stimulus during sensory perception	23	0.111867	0.0673385	0.135212	0.255632	0.805
transition metal ion transmembrane transporter activity	23	0.110346	0.0539992	0.134597	0.240185	0.806
response to wounding	247	0.197853	0.17354	0.209119	0.251788	0.807
regulation of body fluid levels	68	0.159343	0.118641	0.17696	0.252064	0.807
cell-matrix adhesion	57	0.152234	0.110238	0.171576	0.23546	0.807
detection of light stimulus during visual perception	23	0.111867	0.0501708	0.135552	0.238496	0.807
establishment of protein localization	596	0.2114	0.193767	0.219004	0.246646	0.809
integral to Golgi membrane	9	0.0661538	0.0140468	0.0912457	0.256839	0.809
vacuole	179	0.19012	0.159272	0.202995	0.262556	0.81
basolateral plasma membrane	65	0.158417	0.109993	0.176334	0.250987	0.81
sequence-specific DNA binding	380	0.205849	0.182188	0.215051	0.247387	0.811
intracellular protein transport	338	0.202663	0.174345	0.212809	0.244117	0.811
active transmembrane transporter activity	319	0.20266	0.178518	0.212024	0.251857	0.812
glycosyltransferase	136	0.181985	0.15294	0.196538	0.271116	0.812
iron ion binding	263	0.197776	0.171883	0.20914	0.247444	0.814
interleukin receptor activity	35	0.131272	0.0824817	0.153925	0.229206	0.814
magnesium ion binding	322	0.201653	0.179275	0.212125	0.248563	0.815
cytoskeleton	256	0.198716	0.171894	0.209101	0.247155	0.815
mRNA metabolic process	224	0.194392	0.164408	0.206207	0.250255	0.815
mitogen	27	0.118129	0.0643978	0.142343	0.224914	0.815
monosaccharide transport	26	0.117671	0.0638831	0.138306	0.226933	0.816
kinase activity	741	0.21324	0.197683	0.220013	0.243862	0.817
blastocyst development	28	0.120384	0.0669956	0.14435	0.225402	0.817
cellular catabolic process	390	0.206092	0.183493	0.214985	0.243716	0.818
cell-substrate adhesion	59	0.153128	0.106763	0.172272	0.246346	0.819
Wnt receptor signaling pathway, calcium modulating pathway	20	0.106317	0.0510399	0.128779	0.213648	0.819
membrane lipid biosynthetic process	68	0.158884	0.110023	0.17659	0.262782	0.82
iron-sulfur	34	0.128029	0.0671448	0.151591	0.242008	0.82
Transforming growth factor-beta-related	27	0.119079	0.0639412	0.142472	0.225953	0.82
active site:Proton acceptor	399	0.204726	0.180449	0.214574	0.252242	0.821
tRNA processing	42	0.137056	0.0997414	0.160787	0.247167	0.822
lipid homeostasis	19	0.0983388	0.0460683	0.124581	0.233084	0.822
acyltransferase	119	0.178688	0.146228	0.194747	0.244166	0.823
translation regulator activity	113	0.175203	0.139997	0.192195	0.245236	0.823
chaperone	96	0.171325	0.134173	0.187408	0.252377	0.823
regulation of mononuclear cell proliferation	41	0.136971	0.0796502	0.158262	0.248153	0.823
dorsal/ventral pattern formation	35	0.126757	0.0849272	0.151996	0.233953	0.824
transferase	1066	0.216719	0.200419	0.22273	0.245105	0.825
cysteine-type peptidase activity	142	0.182625	0.147261	0.198065	0.244934	0.825
zinc-finger	1076	0.216383	0.204379	0.222479	0.244635	0.826
regulation of lymphocyte proliferation	41	0.136971	0.0791074	0.159329	0.241954	0.826
SANT, DNA-binding	46	0.141743	0.0996043	0.162482	0.242165	0.827
steroid hormone receptor signaling pathway	23	0.107912	0.0604722	0.135222	0.236227	0.827
transferase activity, transferring acyl groups	163	0.186879	0.157278	0.200882	0.258217	0.828
transcription regulator activity	975	0.215909	0.201097	0.222225	0.240703	0.829
glucose transport	25	0.112647	0.0529257	0.13753	0.226092	0.83
negative regulation of MAP kinase activity	12	0.076721	0.0306611	0.105555	0.21615	0.83
NUDIX hydrolase, core	21	0.101735	0.0511333	0.129615	0.220992	0.831
carboxypeptidase A activity	27	0.115248	0.069766	0.142256	0.226858	0.832
acrosome	19	0.0978198	0.0382894	0.125269	0.221635	0.832
glycerophospholipid metabolic process	63	0.154885	0.109148	0.174604	0.247704	0.833
steroid biosynthetic process	58	0.151351	0.0963914	0.172954	0.239158	0.833
Glucose/ribitol dehydrogenase	42	0.136869	0.0898016	0.160125	0.22939	0.834
phosphorylation	595	0.209936	0.19223	0.217958	0.255845	0.835
anti-oncogene	56	0.149046	0.109984	0.168603	0.239569	0.835
gene silencing	30	0.122476	0.0719938	0.146847	0.239849	0.836
dna-binding	1012	0.215746	0.201081	0.222522	0.243601	0.838
sterol homeostasis	19	0.0983388	0.0484034	0.125584	0.226912	0.839
protein transport	565	0.209341	0.188957	0.218529	0.251272	0.84
acetyltransferase activity	56	0.148131	0.104111	0.170268	0.238596	0.84
endocrine system development	40	0.133706	0.0832249	0.157791	0.24573	0.84
macromolecule catabolic process	270	0.198485	0.169693	0.210044	0.245635	0.841
binding	9035	0.225244	0.219177	0.227018	0.232281	0.842
RNA processing	328	0.201793	0.179296	0.212814	0.242407	0.843
Cellular retinaldehyde-binding/triple function, C-terminal	21	0.105135	0.0533314	0.132872	0.234181	0.843
segmentation	37	0.130729	0.0840941	0.154292	0.252551	0.844
Phospholipid biosynthesis	26	0.114114	0.0686714	0.141276	0.229661	0.844
positive regulation of programmed cell death	172	0.186777	0.153642	0.201607	0.25647	0.845
response to oxidative stress	48	0.141421	0.0893305	0.162695	0.235183	0.848
cholesterol homeostasis	19	0.0983388	0.0362592	0.125457	0.218982	0.849
cell cycle phase	244	0.195057	0.171509	0.208033	0.248448	0.85
anti-apoptosis	78	0.161323	0.127857	0.181408	0.254453	0.85
chromosome, pericentric region	57	0.149258	0.107271	0.17127	0.246669	0.85
N-acetylglucosamine metabolic process	22	0.104992	0.0441468	0.13482	0.242117	0.852
glucosamine metabolic process	22	0.104992	0.0475524	0.133125	0.223297	0.852
mRNA processing	199	0.191245	0.168081	0.205272	0.246267	0.853
phospholipid biosynthetic process	60	0.151487	0.106625	0.17274	0.236251	0.853
cell cycle	313	0.19867	0.179836	0.211077	0.244264	0.854
ribonucleoside triphosphate metabolic process	59	0.150602	0.104604	0.171743	0.241669	0.856
positive regulation of apoptosis	169	0.185674	0.160434	0.201007	0.253632	0.857
vesicle-mediated transport	361	0.201961	0.178457	0.21373	0.249351	0.859
Transforming growth factor beta	31	0.121412	0.0723019	0.146545	0.255559	0.859
regulation of T cell activation	57	0.148435	0.101711	0.170404	0.241167	0.862
ATP metabolic process	49	0.138619	0.10327	0.164635	0.233591	0.863
regulation of protein metabolic process	223	0.192561	0.167594	0.206589	0.246608	0.864
inflammatory response	171	0.185809	0.160971	0.201501	0.244921	0.864
biopolymer catabolic process	215	0.191568	0.161139	0.205747	0.259268	0.865
regulation of mitosis	37	0.129027	0.0821561	0.154762	0.232596	0.865
Regulator of G protein signalling	33	0.121809	0.0707811	0.149988	0.23753	0.865
membrane organization and biogenesis	217	0.191044	0.164767	0.205536	0.251603	0.866
intracellular receptor-mediated signaling pathway	28	0.115869	0.0588655	0.144458	0.250864	0.867
positive regulation of hydrolase activity	36	0.127204	0.0776695	0.152852	0.25488	0.868
sushi	31	0.120259	0.0799665	0.147966	0.225811	0.868
cofactor metabolic process	191	0.188219	0.156368	0.203497	0.244794	0.87
flagellum	33	0.123919	0.0767181	0.151374	0.236028	0.87
zinc ion binding	1678	0.218611	0.210168	0.224299	0.240273	0.871
nucleotide phosphate-binding region:ATP	516	0.20679	0.185007	0.216865	0.247778	0.871
Exonuclease	30	0.11846	0.0700418	0.145805	0.259233	0.871
transcription factor activity	692	0.211065	0.192426	0.220164	0.251818	0.872
I-kappaB kinase/NF-kappaB cascade	50	0.140819	0.0935139	0.165952	0.243106	0.872
integrin-mediated signaling pathway	84	0.161873	0.114505	0.184913	0.244469	0.875
purine nucleoside triphosphate metabolic process	59	0.148377	0.117421	0.171497	0.242321	0.875
N-acetyltransferase activity	45	0.136422	0.0950979	0.161516	0.24867	0.875
regulation of caspase activity	41	0.132662	0.0916586	0.159983	0.235791	0.875
Sushi/SCR/CCP	37	0.126624	0.0724474	0.154031	0.228873	0.877
transcription initiation	19	0.0955665	0.0478766	0.126755	0.24029	0.877
Zinc finger, RING/FYVE/PHD-type	108	0.170307	0.141707	0.190532	0.244065	0.878
mitosis	159	0.18221	0.151809	0.199677	0.258463	0.88
mrna splicing	126	0.175418	0.147165	0.194331	0.245361	0.88
metallocarboxypeptidase activity	31	0.118677	0.0705639	0.149407	0.254647	0.881
chromatin modification	159	0.182721	0.157004	0.200221	0.265708	0.882
interleukin binding	39	0.129642	0.0855311	0.156544	0.237163	0.882
transferase activity, transferring phosphorus-containing groups	859	0.212603	0.201375	0.221031	0.245858	0.883
regionalization	127	0.175119	0.14057	0.194525	0.256321	0.883
gland development	60	0.148469	0.0974773	0.174249	0.237111	0.883
magnesium	284	0.196138	0.17537	0.210247	0.248056	0.884
Wnt signaling pathway	136	0.177926	0.14951	0.196542	0.250889	0.884
translation factor activity, nucleic acid binding	107	0.17007	0.140917	0.190178	0.257356	0.884
protein complex binding	50	0.14007	0.0935139	0.165952	0.243106	0.884
zinc	1390	0.216588	0.206487	0.223652	0.240419	0.885
iron-sulfur cluster binding	41	0.131276	0.0796502	0.158262	0.248153	0.885
positive regulation of transcription factor activity	20	0.0962453	0.0489805	0.128639	0.236784	0.885
cytoplasm	1804	0.218725	0.21152	0.224524	0.239388	0.887
AAA ATPase, core	36	0.123445	0.088369	0.153235	0.234706	0.887
phospholipase A2 activity	25	0.106761	0.0746297	0.13825	0.259463	0.887
Serine/threonine-protein kinase	289	0.196566	0.173997	0.210098	0.247524	0.888
actin cytoskeleton	176	0.184763	0.159239	0.201859	0.255012	0.888
lipid catabolic process	102	0.16742	0.142854	0.188047	0.241105	0.888
transcription cofactor activity	127	0.17497	0.146941	0.195058	0.239302	0.889
detection of light stimulus	25	0.108681	0.0563234	0.138291	0.226723	0.889
cation-transporting ATPase activity	55	0.142332	0.111787	0.170667	0.236775	0.892
nuclear lumen	573	0.207905	0.191304	0.218422	0.244537	0.893
catabolic process	509	0.206682	0.187978	0.217699	0.245014	0.893
acetylation	479	0.204155	0.189513	0.216466	0.255182	0.893
nicotinamide metabolic process	21	0.0963012	0.0437782	0.131117	0.227244	0.893
regulation of cell activation	71	0.153465	0.122889	0.178554	0.248279	0.895
exonuclease activity	51	0.140012	0.106948	0.166239	0.241266	0.895
angiogenesis	32	0.118296	0.0784013	0.149785	0.229094	0.896
oxidoreductase activity	732	0.210093	0.1941	0.22016	0.249439	0.897
ATPase activity, coupled to transmembrane movement of ions, phosphorylative mechanism	63	0.149412	0.107411	0.173587	0.24409	0.897
extrinsic to membrane	63	0.148018	0.112505	0.174178	0.236701	0.898
metal cluster binding	41	0.131276	0.0813505	0.159109	0.235158	0.899
carbohydrate transport	60	0.145636	0.116678	0.173078	0.239751	0.901
apoptosis	208	0.186664	0.157949	0.204423	0.251187	0.902
stress-activated protein kinase signaling pathway	44	0.132374	0.10053	0.16149	0.238836	0.902
apical part of cell	71	0.153273	0.118477	0.17868	0.251379	0.903
growth factor activity	135	0.176091	0.146516	0.196193	0.250635	0.904
Pyrimidine metabolism	70	0.152124	0.113296	0.179031	0.240837	0.904
M phase	205	0.187095	0.162942	0.204869	0.246013	0.907
organelle membrane	529	0.205763	0.192719	0.21769	0.247338	0.909
membrane lipid metabolic process	155	0.17803	0.148676	0.200065	0.245023	0.909
determination of left/right symmetry	32	0.117632	0.0760015	0.14926	0.23811	0.91
positive regulation of mononuclear cell proliferation	26	0.104065	0.0615826	0.141326	0.244227	0.91
cellular lipid metabolic process	477	0.203257	0.18552	0.216587	0.248991	0.911
nucleoplasm	458	0.20303	0.188894	0.216189	0.2477	0.911
Basic-leucine zipper (bZIP) transcription factor	41	0.127207	0.0841963	0.157041	0.247439	0.911
JNK cascade	41	0.12691	0.0900999	0.159404	0.235335	0.912
Coiled coil	1054	0.213702	0.203899	0.222499	0.240927	0.913
positive regulation of lymphocyte activation	44	0.130793	0.0994593	0.160699	0.251169	0.914
spliceosome	85	0.158927	0.130459	0.184937	0.243737	0.915
two-component signal transduction system (phosphorelay)	25	0.102666	0.0607788	0.138724	0.228673	0.915
regulation of gene expression	1904	0.218156	0.211738	0.224812	0.240063	0.918
M phase of mitotic cell cycle	160	0.181897	0.158771	0.20054	0.249083	0.919
nucleoside-triphosphatase activity	458	0.202973	0.187991	0.21635	0.241803	0.92
phospholipid metabolic process	125	0.172564	0.138155	0.194415	0.259349	0.92
inflammatory response	48	0.132702	0.104876	0.1651	0.234652	0.921
determination of symmetry	33	0.115511	0.0786487	0.148838	0.231104	0.922
induction of apoptosis by intracellular signals	28	0.107686	0.0615983	0.143239	0.235174	0.922
transcription activator activity	169	0.180371	0.153989	0.201895	0.252667	0.925
nadp	112	0.168571	0.135313	0.192244	0.246169	0.925
Vision	51	0.135294	0.0936561	0.167975	0.233672	0.925
nucleoside triphosphate biosynthetic process	54	0.13616	0.107849	0.167814	0.240467	0.927
adenyl nucleotide binding	1220	0.214506	0.205922	0.223118	0.24301	0.928
membrane-enclosed lumen	655	0.207563	0.193743	0.219237	0.244024	0.928
generation of precursor metabolites and energy	430	0.201624	0.184723	0.215512	0.247928	0.928
determination of bilateral symmetry	33	0.115511	0.0795562	0.149577	0.228491	0.928
hydrolase	1155	0.213613	0.202048	0.22265	0.243141	0.929
positive regulation of lymphocyte proliferation	26	0.104065	0.0678072	0.138843	0.247383	0.929
regulation of programmed cell death	368	0.198131	0.182831	0.213842	0.247854	0.931
organelle lumen	655	0.207563	0.190568	0.219665	0.246196	0.933
induction of apoptosis	130	0.172323	0.1433	0.19622	0.251998	0.933
translation initiation factor activity	75	0.152117	0.123824	0.180439	0.241415	0.933
metal ion-binding site:Magnesium	68	0.147402	0.121819	0.177101	0.247525	0.938
adenyl ribonucleotide binding	1159	0.213121	0.202675	0.222951	0.247466	0.94
programmed cell death	545	0.20414	0.193342	0.218082	0.246539	0.94
initiation factor	63	0.141552	0.100093	0.17586	0.238327	0.94
ABC transporter, transmembrane region, type 1	22	0.093009	0.0477586	0.13324	0.237052	0.94
death	560	0.203844	0.18831	0.218159	0.247997	0.941
chemokine receptor binding	35	0.115312	0.0910786	0.152553	0.235775	0.941
transcription	1841	0.21681	0.21039	0.224434	0.237962	0.942
nucleoside phosphate metabolic process	44	0.12405	0.0951089	0.161573	0.241034	0.942
endocytosis	154	0.17469	0.14843	0.198901	0.245825	0.943
regulation of apoptosis	362	0.197184	0.183344	0.214008	0.249301	0.944
coenzyme metabolic process	161	0.17573	0.155603	0.199228	0.246991	0.944
protein amino acid acylation	25	0.0983313	0.066858	0.139507	0.230964	0.944
hydrolase activity, acting on acid anhydrides, in phosphorus-containing anhydrides	486	0.20081	0.189529	0.21653	0.255262	0.946
induction of programmed cell death	130	0.172323	0.144297	0.195433	0.25166	0.946
Wnt signaling pathway	86	0.154572	0.131519	0.183165	0.249195	0.946
purine nucleotide binding	1492	0.215505	0.200463	0.223967	0.242118	0.947
purine ribonucleotide binding	1430	0.21466	0.206893	0.224082	0.24221	0.949
cytokine activity	176	0.179452	0.160149	0.201684	0.263195	0.949
ATP biosynthetic process	44	0.12405	0.102838	0.161969	0.246933	0.95
pyridine nucleotide metabolic process	24	0.0946446	0.0500579	0.136315	0.239618	0.95
regulation of transcription	1780	0.216572	0.211396	0.224531	0.2395	0.952
bone mineralization	22	0.0904347	0.0617249	0.134329	0.232724	0.952
regulation of cellular process	2982	0.219737	0.213827	0.225693	0.23619	0.953
intracellular organelle part	1984	0.217439	0.212269	0.224694	0.240664	0.953
mononuclear cell proliferation	58	0.137537	0.102574	0.173014	0.248679	0.953
cytokine and chemokine mediated signaling pathway	40	0.118099	0.0868071	0.158344	0.226032	0.953
DNA binding	1543	0.214598	0.207286	0.224168	0.239692	0.954
cytoskeleton	732	0.207794	0.199922	0.220466	0.243236	0.954
membrane invagination	154	0.17469	0.154024	0.199384	0.257453	0.954
Protease inhibitor, Kazal-type	23	0.0922111	0.0591152	0.135799	0.237742	0.954
hydrogen-exporting ATPase activity, phosphorylative mechanism	23	0.0920307	0.0488865	0.134308	0.229947	0.954
regulation of transcription, DNA-dependent	1697	0.21509	0.208317	0.224294	0.243305	0.955
lymphocyte proliferation	58	0.137537	0.10762	0.171689	0.247035	0.955
nucleotide-binding	1126	0.212015	0.204443	0.222724	0.240519	0.956
transforming growth factor beta receptor signaling pathway	43	0.125077	0.0910949	0.160417	0.241514	0.956
ribonucleotide binding	1430	0.21466	0.20732	0.22351	0.240741	0.957
purine ribonucleotide metabolic process	71	0.141524	0.11847	0.17818	0.235351	0.957
atp-binding	871	0.209599	0.198889	0.221576	0.242423	0.958
chromatin remodeling	37	0.111661	0.0736538	0.153131	0.248913	0.958
apoptosis	535	0.202709	0.188098	0.217485	0.244881	0.959
hydrolase activity, acting on acid anhydrides	487	0.201025	0.188196	0.217288	0.249596	0.96
multifunctional enzyme	54	0.133315	0.111135	0.169488	0.241158	0.961
regulation of lymphocyte activation	69	0.142723	0.114373	0.177069	0.239437	0.962
transcription, DNA-dependent	1717	0.215207	0.209693	0.224377	0.239181	0.963
negative regulation of catalytic activity	48	0.126637	0.110513	0.164986	0.232916	0.966
nucleoplasm part	429	0.197923	0.184858	0.215589	0.247095	0.967
mitochondrial inner membrane	211	0.180068	0.160809	0.20485	0.245308	0.967
metal-binding	1872	0.216423	0.211434	0.22448	0.239709	0.968
RNA biosynthetic process	1721	0.215095	0.208621	0.224614	0.239392	0.968
ATPase activity, coupled to transmembrane movement of ions	90	0.151466	0.132979	0.186489	0.237978	0.968
AAA+ ATPase, core	61	0.134035	0.111108	0.173254	0.236622	0.968
Small chemokine, interleukin-8-like	32	0.103035	0.0800194	0.14855	0.225071	0.97
organelle envelope	351	0.193082	0.182535	0.213283	0.247661	0.972
T cell proliferation	44	0.118435	0.0879298	0.161732	0.227556	0.972
nucleobase, nucleoside and nucleotide metabolic process	192	0.174814	0.161588	0.204093	0.262378	0.973
phosphoinositide biosynthetic process	22	0.0839818	0.0609808	0.132633	0.255646	0.973
cytoplasm	4550	0.221096	0.217648	0.226311	0.234487	0.974
cysteine-type endopeptidase activity	89	0.148469	0.116937	0.185252	0.239718	0.974
envelope	354	0.192598	0.181517	0.212899	0.246277	0.976
metalloexopeptidase activity	54	0.13026	0.0954021	0.168455	0.262193	0.976
Kelch related	48	0.122348	0.0924195	0.165905	0.242875	0.976
organelle inner membrane	221	0.179646	0.159035	0.206633	0.249837	0.977
ribonucleotide metabolic process	80	0.145725	0.127434	0.182116	0.256448	0.977
ribonucleotide biosynthetic process	70	0.136434	0.11792	0.178206	0.242298	0.977
cell cycle	612	0.203342	0.193138	0.21903	0.245591	0.979
primary metabolic process	5637	0.221321	0.218892	0.22674	0.233623	0.98
hydrolase activity, acting on acid anhydrides, catalyzing transmembrane movement of substances	125	0.160322	0.139533	0.193722	0.249675	0.98
Wnt receptor signaling pathway	106	0.154113	0.133911	0.190953	0.240156	0.98
innate immune response	71	0.135298	0.11847	0.17818	0.235351	0.981
negative regulation of protein kinase activity	34	0.101468	0.0724191	0.151016	0.231531	0.981
nucleotide biosynthetic process	126	0.158995	0.140028	0.195567	0.240694	0.982
purine nucleotide metabolic process	81	0.144715	0.130994	0.182492	0.24635	0.982
AAA	77	0.141689	0.125229	0.182715	0.245794	0.982
nuclear part	844	0.206766	0.193812	0.221057	0.24155	0.983
peptidase activity	580	0.199656	0.190183	0.218348	0.245881	0.983
cell cycle process	490	0.197158	0.186113	0.217026	0.24492	0.983
mitochondrial envelope	247	0.1816	0.169329	0.207656	0.250382	0.983
mitochondrial membrane	230	0.180288	0.169418	0.207396	0.253617	0.983
metabolic process	6254	0.22132	0.219721	0.226728	0.234261	0.984
mitochondrial part	298	0.185081	0.174992	0.211082	0.246121	0.984
P-P-bond-hydrolysis-driven transmembrane transporter activity	128	0.160919	0.150046	0.194404	0.243985	0.984
ATPase activity, coupled to transmembrane movement of substances	124	0.159641	0.144743	0.194234	0.246203	0.984
cofactor biosynthetic process	104	0.153385	0.133723	0.189861	0.242982	0.984
purine ribonucleotide biosynthetic process	64	0.132926	0.116987	0.173762	0.242982	0.984
chemotaxis	51	0.118943	0.110557	0.167854	0.240774	0.984
mitotic sister chromatid segregation	23	0.0810727	0.0539992	0.134597	0.240185	0.984
primary active transmembrane transporter activity	128	0.160919	0.144567	0.194731	0.257235	0.985
ATPase activity, coupled to movement of substances	124	0.159641	0.135026	0.195051	0.243457	0.985
chemokine activity	34	0.100996	0.0801459	0.15213	0.231787	0.985
negative regulation of kinase activity	34	0.101468	0.0872671	0.150411	0.236157	0.986
sister chromatid segregation	24	0.080958	0.0575737	0.136816	0.228722	0.986
protease	404	0.19331	0.178613	0.214842	0.246254	0.987
water-soluble vitamin biosynthetic process	19	0.06614	0.0464163	0.126882	0.212151	0.987
transit peptide:Mitochondrion	238	0.179557	0.171668	0.207706	0.249753	0.989
negative regulation of transferase activity	36	0.0999743	0.0705806	0.153869	0.24866	0.989
RNA metabolic process	2094	0.215647	0.213153	0.224791	0.24158	0.99
hydrolase activity	1887	0.213197	0.21045	0.224772	0.240942	0.99
regulation of cell cycle	319	0.187695	0.178402	0.212001	0.248384	0.99
nucleotide metabolic process	182	0.168698	0.154849	0.203324	0.250819	0.992
coenzyme biosynthetic process	92	0.141337	0.131576	0.18686	0.241363	0.992
contractile fiber	52	0.117612	0.0944245	0.167702	0.240073	0.992
apical plasma membrane	46	0.108023	0.103136	0.163569	0.253672	0.992
water-soluble vitamin metabolic process	37	0.100601	0.0859705	0.153362	0.229363	0.992
proteolysis	589	0.19845	0.191382	0.21874	0.245713	0.993
purine nucleotide biosynthetic process	72	0.134086	0.125293	0.17904	0.248957	0.993
intracellular	7419	0.221532	0.220348	0.226834	0.234021	0.996
catalytic activity	4441	0.218764	0.217527	0.226275	0.234769	0.996
vitamin metabolic process	60	0.120492	0.113336	0.173062	0.235458	0.996
vitamin biosynthetic process	21	0.0685851	0.0516831	0.129576	0.21628	0.996
sensory perception of light stimulus	99	0.13876	0.131184	0.188625	0.24157	0.997
EGF calcium-binding	55	0.119462	0.111389	0.170773	0.242653	0.998
intracellular part	7039	0.220716	0.219896	0.226935	0.234954	0.999
mitochondrion	800	0.197187	0.193165	0.220502	0.241595	0.999
Mitochondrion	541	0.191626	0.191624	0.217952	0.247908	0.999
transit peptide	333	0.175459	0.171338	0.212471	0.245489	0.999
Zymogen	149	0.157129	0.155376	0.197804	0.261621	0.999
inorganic cation transmembrane transporter activity	130	0.148484	0.14429	0.195322	0.238855	0.999
visual perception	98	0.137498	0.13405	0.188633	0.253904	0.999
Peptidase M10A and M12B, matrixin and adamalysin	37	0.0845952	0.0822747	0.155325	0.238745	0.999
endopeptidase activity	367	0.182795	0.183806	0.213946	0.242285	1
