# Supplementary material for: Gene Expression in the Rodent Brain is Associated with Its Regional Connectivity
Source: PLoS Comput Biol. 2011 May 5;7(5):e1002040. doi: 10.1371/journal.pcbi.1002040 (PMC3088660; doi:10.1371/journal.pcbi.1002040)
Supplement: Table S6 — Correlation test applied to the functional annotation groups arising from 142 genes for which there is information for both rodents and C. elegans. (XLS) [file pcbi.1002040.s008.xls]

## Sheet: Worm corr out
Worm covariation correlation - Outgoing
Limited to genes for which there are orthologs in the rodent data
	Efferent
		Source genes	Random genes of same size
Functional annotation	Size	Correlation	Min Corr	Median Corr	Max Corr	P-value
Homeobox	13	0.173287	-0.0908874	0.125014	0.575858	0.323
DNA-binding region:Homeobox	12	0.180186	-0.0636427	0.129064	0.541361	0.305
nervous system development	20	0.0636081	-0.0239975	0.115739	0.370968	0.76
protein complex	30	0.0656149	-0.0321092	0.0982673	0.322984	0.706
multicellular organismal process	49	0.0897964	0.00650866	0.102287	0.29508	0.587
cell communication	47	0.0686395	0.000680854	0.100806	0.295417	0.732
transcription factor complex	14	0.169748	-0.066746	0.124799	0.510687	0.314
macromolecular complex	32	0.0654185	-0.0152735	0.108964	0.310596	0.751
nucleoplasm part	15	0.168354	-0.0521799	0.121122	0.557262	0.306
HOX	11	0.160858	-0.0694978	0.136681	0.624086	0.411
system development	32	0.068858	-0.000591681	0.106442	0.338685	0.716
multicellular organismal development	38	0.0767079	-0.00524863	0.105884	0.314034	0.659
signal transduction	43	0.0575183	0.00397748	0.101383	0.259172	0.795
nucleoplasm	15	0.168354	-0.0444535	0.123389	0.476979	0.322
Homeobox	9	0.147891	-0.14065	0.144951	0.594558	0.491
Helix-turn-helix motif, lambda-like repressor	7	0.197059	-0.158457	0.150258	0.845128	0.384
sequence-specific DNA binding	14	0.162643	-0.0821849	0.123908	0.564116	0.34
anatomical structure development	34	0.0690845	-0.0130135	0.105866	0.358865	0.693
cell surface receptor linked signal transduction	28	0.0574404	-0.0250781	0.108787	0.349083	0.787
Homeodomain-related	8	0.146868	-0.172242	0.14754	0.82594	0.5
regulation of biological process	50	0.10474	0.00781029	0.101846	0.295829	0.487
Gap junction	7	0.272636	-0.350777	0.151966	0.77686	0.237
nuclear lumen	15	0.168354	-0.0738728	0.123493	0.565827	0.303
gated channel activity	11	0.250941	-0.0660643	0.132835	0.751917	0.138
regulation of cellular metabolic process	34	0.130383	-0.0134029	0.108409	0.310105	0.359
transcription factor activity	16	0.165009	-0.0429935	0.11509	0.563846	0.298
regulation of metabolic process	35	0.130701	-0.0420799	0.107116	0.275899	0.36
biological regulation	53	0.105623	0.000462297	0.0992022	0.278997	0.468
membrane-enclosed lumen	16	0.166404	-0.0497968	0.123613	0.489014	0.306
organelle lumen	16	0.166404	-0.0415951	0.1204	0.513377	0.314
regulation of cellular process	47	0.107793	-0.00493788	0.0969935	0.284017	0.422
nucleotide-binding	23	0.0681374	-0.0496829	0.115602	0.39721	0.74
ion channel activity	12	0.250892	-0.0930262	0.129736	0.539086	0.161
organ development	26	0.08464	-0.0305564	0.11006	0.377075	0.647
behavior	11	0.0416308	-0.0660643	0.132835	0.751917	0.84
plasma membrane part	24	0.0485781	-0.0417932	0.110855	0.403751	0.84
pattern specification process	10	0.106313	-0.166252	0.135385	0.574174	0.591
Transcription regulation	18	0.181357	-0.0435332	0.116077	0.424965	0.231
transcription regulator activity	20	0.141825	-0.0338022	0.11755	0.419026	0.37
substrate specific channel activity	12	0.250892	-0.0636427	0.129064	0.541361	0.123
embryonic morphogenesis	8	0.114786	-0.144001	0.145932	0.648531	0.599
Developmental protein	15	0.122259	-0.0521799	0.121122	0.557262	0.497
generation of neurons	10	0.0430819	-0.108367	0.141186	0.61041	0.839
Transcription	18	0.181357	-0.0342215	0.118926	0.503211	0.24
Ionic channel	10	0.258528	-0.147342	0.132203	0.683748	0.169
domain:Protein kinase	12	0.0329575	-0.0636427	0.129064	0.541361	0.876
protein serine/threonine kinase activity	13	0.0367326	-0.0628979	0.130815	0.50028	0.865
regulation of nucleobase, nucleoside, nucleotide and nucleic acid metabolic process	31	0.15132	-0.0226296	0.0977886	0.323782	0.225
central nervous system development	8	0.11868	-0.155941	0.143825	0.733195	0.573
cell migration	9	0.0406127	-0.147195	0.133883	0.688274	0.846
amino acid binding	3	0.356099	-1	0.174204	1	0.279
developmental process	41	0.0858333	0.00220698	0.101346	0.353084	0.58
protein-tyrosine kinase activity	11	-0.0188669	-0.111137	0.13268	0.643381	0.967
locomotory behavior	9	0.0562482	-0.14065	0.144951	0.594558	0.773
anatomical structure morphogenesis	22	0.0857753	-0.0512443	0.114997	0.429561	0.668
passive transmembrane transporter activity	12	0.250892	-0.0820724	0.128138	0.679404	0.15
channel activity	12	0.250892	-0.0636427	0.129064	0.541361	0.123
regulation of transcription	30	0.15599	-0.0163804	0.110361	0.329901	0.223
neurogenesis	10	0.0430819	-0.166252	0.135385	0.574174	0.825
neuron migration	4	0.0416813	-1	0.170457	0.99968	0.756
binding site:ATP	12	0.0329575	-0.0820724	0.128138	0.679404	0.881
integral to plasma membrane	14	0.0437159	-0.066746	0.124799	0.510687	0.841
cell development	20	0.069162	-0.0239975	0.115739	0.370968	0.737
intrinsic to plasma membrane	14	0.0437159	-0.0602836	0.124141	0.559474	0.822
heterotrimeric G-protein complex	5	0.154486	-0.542162	0.165346	0.996014	0.525
nuclear part	17	0.156136	-0.0510565	0.122428	0.503816	0.354
protein kinase activity	14	0.00490888	-0.0821849	0.123908	0.564116	0.968
transcription	30	0.15599	-0.0189843	0.10924	0.368169	0.22
substrate-specific transmembrane transporter activity	17	0.245624	-0.0384544	0.121297	0.521451	0.098
phosphate metabolic process	17	0.0395064	-0.0407143	0.11554	0.570958	0.852
phosphorus metabolic process	17	0.0395064	-0.0463434	0.120053	0.441742	0.868
embryonic limb morphogenesis	4	0.192467	-1	0.170302	0.99968	0.46
embryonic appendage morphogenesis	4	0.192467	-1	0.170457	0.99968	0.461
organ morphogenesis	12	0.082195	-0.0636427	0.129064	0.541361	0.685
cell differentiation	27	0.0995157	-0.0435814	0.108268	0.337709	0.556
cellular developmental process	27	0.0995157	-0.0413157	0.0974456	0.354999	0.495
dna-binding	17	0.150077	-0.0463434	0.120053	0.441742	0.36
limb morphogenesis	4	0.192467	-1	0.170302	0.99968	0.46
appendage morphogenesis	4	0.192467	-1	0.170457	0.99968	0.461
voltage-gated channel	6	0.2592	-0.215332	0.159054	0.987425	0.266
cell motility	9	0.0406127	-0.134458	0.144101	0.744938	0.841
localization of cell	9	0.0406127	-0.14065	0.144951	0.594558	0.829
ion transmembrane transporter activity	15	0.327576	-0.0738728	0.123493	0.565827	0.035
plasma membrane	26	0.0553065	-0.0561507	0.112498	0.366805	0.794
limb development	4	0.192467	-0.932798	0.170228	0.999981	0.466
appendage development	4	0.192467	-1	0.170302	0.99968	0.46
kinase	14	0.0439134	-0.066746	0.124799	0.510687	0.84
regulation of gene expression	30	0.15599	-0.0163804	0.110361	0.329901	0.223
Serine/threonine-protein kinase	10	0.182896	-0.147342	0.132203	0.683748	0.337
transmembrane transporter activity	18	0.236712	-0.0539534	0.118275	0.445306	0.079
protein amino acid phosphorylation	14	0.0341599	-0.0490211	0.126077	0.458622	0.876
Long-term depression	6	0.0873979	-0.847245	0.15667	0.898836	0.689
Serine/threonine protein kinase, active site	8	0.191483	-0.155941	0.143825	0.733195	0.378
adult locomotory behavior	4	-0.011125	-1	0.170302	0.99968	0.848
potassium channel activity	6	0.273455	-0.215332	0.159054	0.987425	0.245
amine binding	3	0.356099	-1	0.174204	1	0.279
dopamine receptor signaling pathway	3	0.0335242	-1	0.166625	1	0.699
Ion transport	5	0.24558	-0.497773	0.163603	0.999981	0.342
ion transport	11	0.304763	-0.133337	0.134283	0.558703	0.093
purine ribonucleotide binding	24	0.0679246	-0.0325358	0.11014	0.39431	0.744
ribonucleotide binding	24	0.0679246	-0.0428127	0.112902	0.37501	0.722
regulation of transcription, DNA-dependent	26	0.152412	-0.0465331	0.108887	0.396803	0.265
extrinsic to plasma membrane	5	0.154486	-0.847245	0.168108	0.997573	0.53
cation channel activity	8	0.26525	-0.155941	0.143825	0.733195	0.204
nucleotide phosphate-binding region:ATP	14	0.055557	-0.0821849	0.123908	0.564116	0.798
phosphotransferase activity, alcohol group as acceptor	14	0.00490888	-0.066746	0.124799	0.510687	0.959
atp-binding	17	0.0390111	-0.0384544	0.121297	0.521451	0.868
active site:Proton acceptor	12	0.0418679	-0.138924	0.131274	0.550806	0.813
system process	17	0.142721	-0.0463434	0.120053	0.441742	0.385
transcription, DNA-dependent	26	0.152412	-0.0197028	0.111381	0.433728	0.265
Immunoglobulin subtype 2	7	-0.00905802	-0.425395	0.149613	0.989629	0.919
RNA biosynthetic process	26	0.152412	-0.0561507	0.112498	0.366805	0.261
Protein kinase, core	9	0.0773736	-0.134458	0.144101	0.744938	0.728
protein phosphatase	5	0.009028	-0.847245	0.168108	0.997573	0.848
regulation of membrane potential	4	0.109107	-1	0.170302	0.99968	0.615
brain development	6	0.115538	-0.787458	0.158617	0.9921	0.615
purine nucleotide binding	24	0.0679246	-0.0428127	0.112902	0.37501	0.722
negative regulation of apoptosis	5	0.0801894	-0.497773	0.163603	0.999981	0.689
glycoprotein	34	0.0465524	-0.019342	0.0977475	0.31536	0.832
regionalization	6	0.0805029	-0.567907	0.155629	0.85431	0.704
molecular transducer activity	29	0.0160527	-0.0135872	0.106324	0.386399	0.966
signal transducer activity	29	0.0160527	-0.0203048	0.104833	0.359114	0.973
embryonic development	10	0.11612	-0.073044	0.138037	0.908153	0.583
negative regulation of programmed cell death	5	0.0801894	-0.497773	0.163603	0.999981	0.689
forebrain development	4	0.148428	-1	0.170302	0.99968	0.544
phosphorylation	14	0.0341599	-0.066746	0.124799	0.510687	0.881
adult behavior	4	-0.011125	-1	0.170302	0.99968	0.848
heart morphogenesis	2	0.095104	-1	0.0746442	1	0.48
chordate embryonic development	6	0.0835516	-0.215332	0.159054	0.987425	0.695
post-translational protein modification	21	0.0287564	-0.019907	0.114079	0.38132	0.918
cation transmembrane transporter activity	11	0.351101	-0.133337	0.134283	0.558703	0.049
voltage-gated ion channel activity	6	0.2592	-0.567907	0.155629	0.85431	0.286
voltage-gated channel activity	6	0.2592	-0.787458	0.158617	0.9921	0.263
metal ion transmembrane transporter activity	8	0.26525	-0.237987	0.148131	0.906931	0.191
extrinsic to membrane	5	0.154486	-0.497773	0.163603	0.999981	0.515
embryonic development ending in birth or egg hatching	6	0.0835516	-0.847245	0.15667	0.898836	0.699
biopolymer metabolic process	46	0.0966032	0.00167378	0.103748	0.288348	0.544
synaptic transmission	6	-0.00943707	-0.787458	0.158617	0.9921	0.906
muscle fiber development	4	-0.179331	-1	0.170457	0.99968	0.955
skeletal muscle fiber development	4	-0.179331	-0.66347	0.173212	0.999734	0.968
substrate-specific transporter activity	17	0.245624	-0.0384544	0.121297	0.521451	0.098
basolateral plasma membrane	4	0.0173248	-0.916469	0.180407	0.999547	0.798
kinase activity	15	0.011662	-0.0489483	0.123875	0.45456	0.947
Palmitate	7	0.110281	-0.425395	0.149613	0.989629	0.611
Cytoskeleton	2	0.393708	-1	0.0746442	1	0.256
G protein alpha subunit, helical insertion	3	0.146922	-1	0.166625	1	0.538
nucleotide binding	25	0.069178	-0.0473823	0.111942	0.39323	0.733
neurotransmitter metabolic process	2	0.142392	-1	0.101091	1	0.466
phosphoric monoester hydrolase	3	-0.0261681	-1	0.174204	1	0.823
neuron differentiation	8	0.0395777	-0.237987	0.148131	0.906931	0.833
dorsal/ventral pattern formation	4	0.117581	-0.929499	0.169917	0.999981	0.603
cell-cell signaling	7	0.165969	-0.187491	0.153092	0.898836	0.459
IGc2	7	-0.00905802	-0.158457	0.150258	0.845128	0.929
binding	89	0.106106	0.0303703	0.102511	0.225448	0.461
transferase activity, transferring phosphorus-containing groups	16	0.0216325	-0.0695944	0.120278	0.530497	0.934
muscle development	5	-0.128819	-0.380853	0.162336	0.99941	0.984
Guanine nucleotide binding protein (G-protein), alpha subunit	3	0.146922	-1	0.174204	1	0.543
ligand-gated channel activity	5	0.418044	-0.380853	0.162336	0.99941	0.115
ligand-gated ion channel activity	5	0.418044	-0.497773	0.163603	0.999981	0.128
Protein kinase, C-terminal	4	0.118504	-1	0.170302	0.99968	0.594
PIRSF002400:GTP-binding regulatory protein Gs alpha chain	3	0.146922	-1	0.174204	1	0.543
microtubule-based process	5	0.197574	-0.380853	0.162336	0.99941	0.419
serotonin receptor activity	2	0.133458	-1	0.0231096	1	0.403
positive regulation of metabolic process	8	0.109166	-0.172242	0.14754	0.82594	0.609
transmission of nerve impulse	6	-0.00943707	-0.567907	0.155629	0.85431	0.902
regulation of postsynaptic membrane potential	2	0.290241	-1	0.0746442	1	0.324
GTPase activity	5	0.136707	-0.380853	0.162336	0.99941	0.556
Neuroactive ligand-receptor interaction	7	0.0719588	-0.20572	0.151129	0.723486	0.719
intracellular organelle part	25	0.130372	-0.0327685	0.103192	0.355217	0.364
amine receptor activity	3	0.175484	-1	0.153362	0.999981	0.477
Potassium channel	3	0.283603	-1	0.174204	1	0.357
domain:AGC-kinase C-terminal	4	0.118504	-0.66347	0.173212	0.999734	0.611
organelle part	25	0.130372	-0.0473823	0.111942	0.39323	0.398
Immunoglobulin I-set	5	-0.0131348	-0.989382	0.161242	0.999919	0.872
ATP	5	0.0745482	-0.380853	0.162336	0.99941	0.693
DNA binding	5	0.296761	-0.497773	0.163603	0.999981	0.258
phosphoprotein phosphatase activity	5	0.009028	-0.989382	0.161242	0.999919	0.84
DNA binding	21	0.170424	-0.0373069	0.117701	0.395107	0.226
S_TKc	8	0.075483	-0.144001	0.145932	0.648531	0.722
tube morphogenesis	5	-0.0170766	-0.847245	0.168108	0.997573	0.892
plasma membrane fusion	2	-1.53003e-15	-1	0.0746442	1	0.828
Potassium channel, voltage dependent, Kv	2	0.493464	-1	0.0746442	1	0.176
regulation of neurotransmitter levels	3	0.0255832	-1	0.166625	1	0.709
adenyl ribonucleotide binding	18	0.0389219	-0.0582884	0.119074	0.390467	0.878
positive regulation of nucleobase, nucleoside, nucleotide and nucleic acid metabolic process	6	0.173965	-0.787458	0.158617	0.9921	0.465
tyrosine-protein kinase	4	-0.0412961	-0.66347	0.173212	0.999734	0.89
microtubule cytoskeleton	6	0.152341	-0.447214	0.155468	0.802193	0.509
potassium ion transport	5	0.269147	-0.847245	0.168108	0.997573	0.315
S_TK_X	4	0.118504	-1	0.170457	0.99968	0.595
skeletal muscle development	4	-0.179331	-1	0.170302	0.99968	0.956
Tyrosine protein kinase	4	-0.0667993	-1	0.170457	0.99968	0.901
protein binding	56	0.0813953	0.0172461	0.0998757	0.239852	0.618
protein modification process	21	0.0287564	-0.0226099	0.109065	0.445124	0.916
tyrosine-specific phosphatase	2	-0.00336401	-1	0.0872275	1	0.818
Cyclic nucleotide-binding	3	0.0310568	-1	0.174204	1	0.715
positive regulation of cellular metabolic process	7	0.110556	-0.192777	0.150691	0.98762	0.623
cell projection organization and biogenesis	7	0.101842	-0.20572	0.151129	0.723486	0.637
cell projection morphogenesis	7	0.101842	-0.187491	0.153092	0.898836	0.644
cell part morphogenesis	7	0.101842	-0.158457	0.150258	0.845128	0.652
short sequence motif:Octapeptide motif	2	-0.178613	-1	0.0746442	1	0.902
immunoglobulin domain	8	-0.00912915	-0.237987	0.148131	0.906931	0.945
sensory perception of light stimulus	5	0.294433	-0.497773	0.163603	0.999981	0.262
circulatory system process	5	0.0732542	-0.847245	0.168108	0.997573	0.712
blood circulation	5	0.0732542	-0.542162	0.165346	0.996014	0.702
nucleobase, nucleoside, nucleotide and nucleic acid metabolic process	34	0.159957	-0.0205879	0.102943	0.32344	0.193
neurological system process	12	0.213868	-0.0820724	0.128138	0.679404	0.226
enzyme linked receptor protein signaling pathway	6	0.145723	-0.215332	0.159054	0.987425	0.54
phosphotransferase	4	0.0714703	-0.932798	0.170228	0.999981	0.69
multicellular organismal response to stress	2	0	-1	0.0746442	1	0.587
neuron development	6	-0.0107384	-0.215332	0.159054	0.987425	0.921
glycosylation site:N-linked (GlcNAc...)	28	0.0558428	-0.0217891	0.105565	0.369868	0.799
Serine/threonine protein kinase	5	0.177753	-0.380853	0.162336	0.99941	0.463
domain:RGS	3	0	-1	0.174204	1	0.757
heart development	4	0.134812	-0.932798	0.170228	0.999981	0.568
gene expression	31	0.154532	-0.0226296	0.0977886	0.323782	0.216
intracellular signaling cascade	17	0.103038	-0.0615198	0.118313	0.489021	0.577
cellular chemical homeostasis	5	0.0839206	-0.380853	0.162336	0.99941	0.67
cellular ion homeostasis	5	0.0839206	-0.497773	0.163603	0.999981	0.677
adenyl nucleotide binding	18	0.0389219	-0.0293184	0.111071	0.467789	0.855
voltage-gated cation channel activity	4	0.247889	-1	0.170457	0.99968	0.365
negative regulation of biological process	14	0.0543231	-0.0821849	0.123908	0.564116	0.8
ATP binding	17	0.0390111	-0.053142	0.121847	0.481743	0.872
in utero embryonic development	3	-0.0889042	-1	0.174204	1	0.875
monovalent inorganic cation transport	7	0.335822	-0.192777	0.150691	0.98762	0.13
regulation of apoptosis	7	0.0672679	-0.20572	0.151129	0.723486	0.732
biopolymer modification	21	0.0287564	-0.0344537	0.115998	0.448855	0.927
Calcium signaling pathway	6	0.127116	-0.787458	0.158617	0.9921	0.586
RNA metabolic process	26	0.152412	-0.0561507	0.112498	0.366805	0.261
focal adhesion	3	0.0498096	-1	0.174204	1	0.693
somatotropin secreting cell differentiation	2	0.126722	-1	0.0302241	1	0.423
receptor	18	0.0040669	-0.0539534	0.118275	0.445306	0.973
gland development	3	0.125635	-1	0.174204	1	0.576
learning and/or memory	3	-0.0364133	-1	0.166625	1	0.826
Regulator of G protein signalling	3	0	-0.980561	0.163934	1	0.739
regulation of programmed cell death	7	0.0672679	-0.187491	0.153092	0.898836	0.736
negative regulation of cellular process	13	0.0557304	-0.0908874	0.125014	0.575858	0.808
LIM	3	0.277649	-1	0.174204	1	0.365
guanyl ribonucleotide binding	7	0.14895	-0.192777	0.150691	0.98762	0.506
Voltage-dependent potassium channel	2	0.493464	-1	0.0231096	1	0.134
membrane fusion	2	-1.53003e-15	-1	0.0746442	1	0.828
guanyl nucleotide binding	7	0.14895	-0.192777	0.150691	0.98762	0.506
microtubule cytoskeleton organization and biogenesis	3	0.101784	-0.980561	0.163934	1	0.59
kidney development	4	0.463231	-0.916469	0.180407	0.999547	0.152
Heme NO binding associated	2	0.448861	-1	0.0872275	1	0.209
transporter activity	18	0.236712	-0.0378266	0.119209	0.500076	0.102
neurotransmitter transport	3	0.294741	-1	0.174204	1	0.346
cell-substrate adherens junction	3	0.0498096	-1	0.166625	1	0.677
cNMP	3	0.0310568	-0.980561	0.163934	1	0.697
topological domain:Lumenal, vesicle	2	0.262268	-1	0.0746442	1	0.333
ion homeostasis	5	0.0839206	-0.380853	0.162336	0.99941	0.67
lipoprotein	10	0.26436	-0.158621	0.139513	0.77896	0.16
urogenital system development	4	0.463231	-0.916469	0.180407	0.999547	0.152
potassium transport	3	0.283603	-1	0.153362	0.999981	0.34
tube development	5	-0.0170766	-0.864947	0.157836	0.997477	0.892
positive regulation of transcription	5	0.156872	-0.989382	0.161242	0.999919	0.509
striated muscle development	4	-0.179331	-1	0.170302	0.99968	0.956
cgmp-binding	2	0.039022	-1	0.0302241	1	0.492
Protein-tyrosine phosphatase, receptor/non-receptor type	2	-0.00336401	-1	0.0231096	1	0.81
Tyrosine protein kinase, active site	3	-0.078257	-1	0.181328	1	0.884
cell-matrix junction	3	0.0498096	-1	0.174204	1	0.693
domain:Ig-like C2-type 5	3	0.108939	-1	0.166625	1	0.602
ion transport	12	0.293578	-0.0705577	0.1309	0.502674	0.089
glycine binding	2	0.0707497	-1	0.101091	1	0.522
axon guidance	3	0.164213	-1	0.178108	1	0.52
ureteric bud development	3	0.471983	-1	0.174204	1	0.176
neurotransmitter receptor	2	0.133458	-1	0.0302241	1	0.416
negative regulation of transcription	5	0.197248	-0.497773	0.163603	0.999981	0.422
localization	30	0.0540482	-0.0321092	0.0982673	0.322984	0.781
TyrKc	4	-0.0667993	-0.996119	0.170527	0.999973	0.903
righting reflex	2	-0.5	-1	0.0746442	1	0.962
potassium	3	0.283603	-1	0.166625	1	0.336
RGS	3	0	-0.980561	0.163934	1	0.737
neurite development	5	0.0204166	-0.847245	0.168108	0.997573	0.824
transmembrane receptor protein serine/threonine kinase signaling pathway	3	-0.173323	-1	0.174204	1	0.916
neurogenesis	4	0.0250977	-0.66347	0.173212	0.999734	0.789
voltage-gated potassium channel activity	3	0.283603	-0.980561	0.163934	1	0.336
protein tyrosine phosphatase activity	3	0.0398843	-1	0.181328	1	0.69
Potassium channel, voltage dependent, Kv, tetramerisation	2	0.493464	-1	0.0872275	1	0.176
Fibronectin, type III-like fold	5	0.0373262	-0.989382	0.161242	0.999919	0.783
Fibronectin, type III	5	0.0373262	-0.380853	0.162336	0.99941	0.806
domain:Ig-like C2-type 2	4	-0.120836	-0.932798	0.170228	0.999981	0.946
domain:Ig-like C2-type 1	4	-0.120836	-1	0.170457	0.99968	0.933
cyclic nucleotide metabolic process	3	0.369424	-1	0.166625	1	0.249
Immunoglobulin-like	7	0.00229279	-0.20572	0.151434	0.723486	0.9
G-protein coupled receptor protein signaling pathway	14	0.0935719	-0.0821849	0.123908	0.564116	0.623
positive regulation of transcription, DNA-dependent	4	0.142879	-1	0.170457	0.99968	0.554
cell morphogenesis	9	0.117612	-0.23275	0.138823	0.843937	0.585
cellular structure morphogenesis	9	0.117612	-0.134458	0.144101	0.744938	0.588
positive regulation of biological process	12	0.0772744	-0.138924	0.131274	0.550806	0.671
chloride channel	3	-0.5	-1	0.174204	1	0.976
domain:Ig-like C2-type 4	3	0.108939	-1	0.166625	1	0.602
domain:LIM zinc-binding 2	2	0.353788	-1	0.0231096	1	0.24
domain:LIM zinc-binding 1	2	0.353788	-1	0.098444	1	0.303
regulation of heart contraction	3	-0.00589394	-1	0.153362	0.999981	0.8
response to organic substance	2	0.290241	-1	0.0747433	1	0.341
differentiation	7	0.166386	-0.425395	0.149613	0.989629	0.448
GPCR, family 3, metabotropic glutamate receptor	2	-8.18789e-16	-1	0.0746442	1	0.827
adenohypophysis development	2	0.126722	-1	0.0302241	1	0.423
receptor activity	21	0.013236	-0.0344537	0.115998	0.448855	0.971
glutamate receptor activity	3	-0.0446126	-1	0.174204	1	0.839
tyrosine-specific protein kinase	2	0	-1	0.0302241	1	0.556
cell	92	0.108954	0.0236967	0.105752	0.258498	0.469
cell part	92	0.108954	0.0327694	0.100618	0.240134	0.425
negative regulation of nucleobase, nucleoside, nucleotide and nucleic acid metabolic process	5	0.197248	-0.542162	0.165346	0.996014	0.425
myoblast differentiation	2	-0.5	-1	0.0746442	1	0.962
phosphoric monoester hydrolase activity	5	0.009028	-0.380853	0.162336	0.99941	0.86
cGMP binding	2	0.039022	-1	0.0231096	1	0.492
GMP binding	2	0.039022	-1	0.0746442	1	0.526
negative regulation of signal transduction	4	0.0325437	-1	0.170302	0.99968	0.773
regulation of multicellular organismal process	6	0.057598	-0.847245	0.15667	0.898836	0.76
Immunoglobulin-like fold	7	-0.00905802	-0.158457	0.150258	0.845128	0.929
chloride	3	-0.5	-1	0.174204	1	0.976
potassium ion binding	3	0.283603	-1	0.174204	1	0.357
PTPc	2	-0.00336401	-1	0.0316372	1	0.816
axonogenesis	4	0.172134	-0.996119	0.170527	0.999973	0.497
synaptosome	2	-1.54564e-15	-1	0.0746442	1	0.828
negative regulation of metabolic process	6	0.184252	-0.215332	0.159054	0.987425	0.43
anti-apoptosis	2	-0.326726	-1	0.0231096	1	0.938
heart contraction	3	-0.00589394	-1	0.181328	1	0.81
heart process	3	-0.00589394	-1	0.153362	0.999981	0.8
GTP-binding	5	0.0902127	-0.864947	0.157836	0.997477	0.667
alkali metal ion binding	4	0.303194	-1	0.170302	0.99968	0.289
topological domain:Extracellular	18	0.0662748	-0.0539534	0.118275	0.445306	0.745
positive regulation of cellular process	11	0.0780106	-0.111137	0.13268	0.643381	0.706
chemical homeostasis	5	0.0839206	-0.847245	0.168108	0.997573	0.692
microtubule	3	0.144314	-1	0.174204	1	0.548
metanephros development	3	0.471983	-1	0.174204	1	0.176
single fertilization	2	-1.5439e-15	-1	0.0302241	1	0.808
endocrine system development	3	0.125635	-0.980561	0.163934	1	0.56
inner ear morphogenesis	3	0.418052	-1	0.181328	1	0.242
chloride ion binding	3	-0.5	-1	0.153362	0.999981	0.98
anion binding	3	-0.5	-1	0.178108	1	0.981
topological domain:Cytoplasmic	22	0.0657576	-0.0345172	0.113791	0.45133	0.758
reflex	2	-0.5	-1	0.0746442	1	0.962
neurotransmitter receptor activity	3	0.230965	-1	0.166625	1	0.404
neurotransmitter transport	3	0.294741	-0.980561	0.163934	1	0.325
sensory organ development	5	0.209983	-0.847245	0.168108	0.997573	0.408
visual perception	4	0.281616	-0.996119	0.170527	0.999973	0.31
neurotransmitter binding	3	0.230965	-1	0.178108	1	0.413
metal ion transport	7	0.263149	-0.425395	0.149613	0.989629	0.221
neurite morphogenesis	4	0.172134	-1	0.170302	0.99968	0.497
neuron morphogenesis during differentiation	4	0.172134	-0.66347	0.173212	0.999734	0.501
transducer	9	0.105985	-0.134458	0.144101	0.744938	0.626
chloride channel activity	3	-0.5	-1	0.181328	1	0.986
repressor	3	0.999408	-1	0.174204	1	0.013
response to stimulus	22	0.0437603	-0.0406004	0.117193	0.395731	0.858
Zinc finger, LIM-type	2	0.353788	-1	0.101091	1	0.304
fertilization	2	-1.5439e-15	-1	0.0872275	1	0.816
nucleoside-triphosphatase activity	7	0.0959388	-0.350777	0.151966	0.77686	0.659
Immunoglobulin subtype	5	0.0215327	-0.989382	0.161242	0.999919	0.817
cation transport	8	0.317606	-0.237987	0.148131	0.906931	0.118
cell surface	5	0.0280903	-0.497773	0.163603	0.999981	0.808
regulation of cell differentiation	4	0.324409	-1	0.170302	0.99968	0.259
voltage-gated potassium channel complex	2	0.493464	-1	0.0302241	1	0.161
cellular homeostasis	5	0.0839206	-0.989382	0.161242	0.999919	0.68
ear morphogenesis	3	0.418052	-1	0.174204	1	0.222
Cleavage on pair of basic residues	4	0.001265	-0.66347	0.173212	0.999734	0.831
transport	15	0.274712	-0.0444535	0.123389	0.476979	0.075
BTB/POZ fold	3	0.479427	-1	0.181328	1	0.186
apoptosis	8	0.0644282	-0.155941	0.143825	0.733195	0.776
transferase	14	0.0468118	-0.0821849	0.123908	0.564116	0.839

## Sheet: Worm corr in
Worm covariation correlation - Incoming
Limited to genes for which there are orthologs in the rodent data
	Efferent
		Source genes	Random genes of same size
Functional annotation	Size	Correlation	Min Corr	Median Corr	Max Corr	P-value
Homeobox	13	0.056464	-0.258806	0.18323	0.874294	0.815
DNA-binding region:Homeobox	12	0.0570796	-0.239001	0.177059	0.92046	0.785
nervous system development	20	0.082278	-0.0592767	0.158199	0.678623	0.733
protein complex	30	0.0979166	-0.0398253	0.128423	0.543138	0.617
multicellular organismal process	49	0.0889496	-0.00539119	0.113826	0.397533	0.655
cell communication	47	0.098022	-0.000501994	0.108002	0.383611	0.557
transcription factor complex	14	0.0669722	-0.251059	0.175051	0.872542	0.78
macromolecular complex	32	0.0980727	-0.0134552	0.122371	0.590285	0.613
nucleoplasm part	15	0.0731442	-0.118231	0.167325	0.832709	0.749
HOX	11	0.0682101	-0.51264	0.186381	0.998663	0.759
system development	32	0.0844358	-0.0429218	0.119919	0.456933	0.658
multicellular organismal development	38	0.0875162	-0.0094538	0.118911	0.539488	0.659
signal transduction	43	0.0910862	0.00728162	0.11226	0.474436	0.624
nucleoplasm	15	0.0731442	-0.21016	0.169622	0.789026	0.767
Homeobox	9	0.05937	-0.907855	0.190765	0.993386	0.753
Helix-turn-helix motif, lambda-like repressor	7	0.241078	-0.974759	0.20028	1	0.425
sequence-specific DNA binding	14	0.0667489	-0.18586	0.167341	0.823425	0.759
anatomical structure development	34	0.0848106	-0.0382179	0.127224	0.538168	0.675
cell surface receptor linked signal transduction	28	0.0761527	-0.0342807	0.12886	0.590343	0.729
Homeodomain-related	8	0.0598533	-0.989275	0.195793	0.999363	0.75
regulation of biological process	50	0.101209	-0.000551	0.112358	0.382967	0.566
Gap junction	7	0.478124	-0.974759	0.20028	1	0.13
nuclear lumen	15	0.0731442	-0.18589	0.165867	0.758831	0.741
gated channel activity	11	0.218611	-0.5	0.19128	0.869925	0.431
regulation of cellular metabolic process	34	0.127368	-0.0107767	0.118435	0.51181	0.459
transcription factor activity	16	0.0607931	-0.118581	0.166591	0.833572	0.791
regulation of metabolic process	35	0.12745	0.00486575	0.126371	0.459613	0.496
biological regulation	53	0.111539	0.00449513	0.107888	0.375792	0.478
membrane-enclosed lumen	16	0.062307	-0.246465	0.167125	0.673278	0.794
organelle lumen	16	0.062307	-0.159523	0.165081	0.788919	0.802
regulation of cellular process	47	0.108888	-0.0226142	0.112605	0.382963	0.527
nucleotide-binding	23	0.158547	-0.111414	0.148323	0.613531	0.471
ion channel activity	12	0.217758	-0.909391	0.174003	0.837301	0.4
organ development	26	0.0973928	-0.0306853	0.137932	0.584319	0.642
behavior	11	0.0722488	-0.233417	0.182444	0.919999	0.735
plasma membrane part	24	0.0618135	-0.0349503	0.140822	0.616526	0.806
pattern specification process	10	0.123489	-0.544487	0.193134	0.993386	0.64
Transcription regulation	18	-0.00267805	-0.107255	0.16433	0.721093	0.976
transcription regulator activity	20	0.0758059	-0.153258	0.145525	0.597591	0.724
substrate specific channel activity	12	0.217758	-0.268664	0.188289	0.982593	0.422
embryonic morphogenesis	8	0.108825	-0.989275	0.195793	0.999363	0.652
Developmental protein	15	0.124389	-0.118231	0.167325	0.832709	0.609
generation of neurons	10	0.0561001	-0.515474	0.192829	1	0.793
Transcription	18	-0.00267805	-0.152255	0.149495	0.677611	0.979
Ionic channel	10	0.219655	-0.518525	0.191688	0.998221	0.44
domain:Protein kinase	12	0.163014	-0.239001	0.177059	0.92046	0.533
protein serine/threonine kinase activity	13	0.162719	-0.208584	0.178073	0.782391	0.546
regulation of nucleobase, nucleoside, nucleotide and nucleic acid metabolic process	31	0.0787862	-0.0463412	0.128689	0.545719	0.701
central nervous system development	8	0.056578	-1	0.201791	1	0.764
cell migration	9	0.0404842	-0.989275	0.194417	0.992642	0.815
amino acid binding	3	0.589017	-1	2.498e-16	1	0.103
developmental process	41	0.0899362	-0.00137911	0.115946	0.449146	0.641
protein-tyrosine kinase activity	11	0.128337	-0.5	0.182172	0.846391	0.617
locomotory behavior	9	0.156027	-0.632562	0.193225	1	0.584
anatomical structure morphogenesis	22	0.130866	-0.145588	0.138966	0.575005	0.525
passive transmembrane transporter activity	12	0.217758	-0.268664	0.188289	0.982593	0.422
channel activity	12	0.217758	-0.239001	0.177059	0.92046	0.4
regulation of transcription	30	0.0882071	-0.018293	0.126951	0.590222	0.661
neurogenesis	10	0.0561001	-0.544487	0.193467	0.993386	0.787
neuron migration	4	0.0514373	-1	0.154477	1	0.619
binding site:ATP	12	0.163014	-0.428843	0.17719	0.853753	0.535
integral to plasma membrane	14	0.0766906	-0.320797	0.174489	0.98534	0.745
cell development	20	0.0623572	-0.0592767	0.158199	0.678623	0.821
intrinsic to plasma membrane	14	0.0766906	-0.423893	0.165101	0.831547	0.737
heterotrimeric G-protein complex	5	0.180915	-1	0.181067	1	0.501
nuclear part	17	0.0625516	-0.11084	0.159624	0.771097	0.785
protein kinase activity	14	0.166297	-0.320797	0.174489	0.98534	0.52
transcription	30	0.0882071	-0.0441207	0.123627	0.57983	0.655
substrate-specific transmembrane transporter activity	17	0.241829	-0.130845	0.162383	0.723498	0.274
phosphate metabolic process	17	0.0245864	-0.11084	0.159624	0.771097	0.928
phosphorus metabolic process	17	0.0245864	-0.106269	0.165129	0.710043	0.932
embryonic limb morphogenesis	4	0.209761	-1	0.154477	1	0.426
embryonic appendage morphogenesis	4	0.209761	-1	0.135186	1	0.414
organ morphogenesis	12	0.0978887	-0.358627	0.18317	0.820383	0.7
cell differentiation	27	0.081334	-0.0374427	0.129649	0.497849	0.672
cellular developmental process	27	0.081334	-0.111976	0.136839	0.494224	0.707
dna-binding	17	0.0646408	-0.151648	0.154589	0.696794	0.769
limb morphogenesis	4	0.209761	-1	0.151344	1	0.423
appendage morphogenesis	4	0.209761	-1	0.127138	1	0.408
voltage-gated channel	6	0.272737	-1	0.200125	1	0.37
cell motility	9	0.0404842	-0.907855	0.1903	0.993386	0.813
localization of cell	9	0.0404842	-0.632562	0.193225	1	0.807
ion transmembrane transporter activity	15	0.290427	-0.18589	0.165867	0.758831	0.187
plasma membrane	26	0.0826389	-0.0306853	0.137932	0.584319	0.704
limb development	4	0.209761	-1	0.151344	1	0.423
appendage development	4	0.209761	-1	0.127138	1	0.408
kinase	14	0.166859	-0.320797	0.174489	0.98534	0.518
regulation of gene expression	30	0.0882071	-0.0441207	0.123627	0.57983	0.655
Serine/threonine-protein kinase	10	0.634176	-0.518525	0.191688	0.998221	0.018
transmembrane transporter activity	18	0.227819	-0.11708	0.162826	0.642994	0.308
protein amino acid phosphorylation	14	0.166384	-0.209437	0.169843	0.7859	0.512
Long-term depression	6	0.291351	-1	0.201128	1	0.353
Serine/threonine protein kinase, active site	8	0.633855	-0.907855	0.196903	0.997053	0.044
adult locomotory behavior	4	-0.110796	-1	0.123659	1	0.856
potassium channel activity	6	0.217775	-1	0.179925	1	0.447
amine binding	3	0.589017	-1	0.0220426	1	0.136
dopamine receptor signaling pathway	3	-0.0439993	-1	2.498e-16	1	0.845
Ion transport	5	0.159359	-1	0.171868	1	0.516
ion transport	11	0.218611	-0.389357	0.184049	0.892038	0.42
purine ribonucleotide binding	24	0.158506	-0.0265569	0.145524	0.605358	0.446
ribonucleotide binding	24	0.158506	-0.0390438	0.146131	0.553	0.459
regulation of transcription, DNA-dependent	26	0.0756653	-0.0324717	0.134584	0.590402	0.744
extrinsic to plasma membrane	5	0.180915	-1	0.181067	1	0.501
cation channel activity	8	0.205341	-0.907855	0.195356	0.997053	0.481
nucleotide phosphate-binding region:ATP	14	0.16588	-0.320797	0.174489	0.98534	0.521
phosphotransferase activity, alcohol group as acceptor	14	0.166297	-0.18586	0.167341	0.823425	0.503
atp-binding	17	0.170802	-0.130845	0.162383	0.723498	0.469
active site:Proton acceptor	12	0.155204	-0.428843	0.17719	0.853753	0.549
system process	17	0.153217	-0.106269	0.165129	0.710043	0.534
transcription, DNA-dependent	26	0.0756653	-0.0533755	0.129529	0.576812	0.71
Immunoglobulin subtype 2	7	0.0594758	-1	0.203438	0.999945	0.741
RNA biosynthetic process	26	0.0756653	-0.0336763	0.143441	0.553387	0.746
Protein kinase, core	9	0.196986	-0.989275	0.194417	0.992642	0.495
protein phosphatase	5	0.0163223	-1	0.172716	1	0.716
regulation of membrane potential	4	0.239302	-1	0.123659	1	0.369
brain development	6	0.0337663	-1	0.179925	1	0.746
purine nucleotide binding	24	0.158506	-0.0265569	0.145524	0.605358	0.446
negative regulation of apoptosis	5	-0.0834577	-1	0.181466	1	0.888
glycoprotein	34	0.073756	-0.0287388	0.123358	0.549395	0.739
regionalization	6	0.123855	-0.974759	0.191068	1	0.614
molecular transducer activity	29	0.0499727	-0.0440327	0.125668	0.579495	0.855
signal transducer activity	29	0.0499727	-0.0299881	0.134021	0.582095	0.87
embryonic development	10	0.109062	-0.405095	0.184476	0.986895	0.654
negative regulation of programmed cell death	5	-0.0834577	-1	0.181466	1	0.888
forebrain development	4	0.0187396	-1	0.135186	1	0.636
phosphorylation	14	0.166384	-0.320797	0.174489	0.98534	0.52
adult behavior	4	-0.110796	-1	0.138736	1	0.865
heart morphogenesis	2	0	-1	0	1	0.36
chordate embryonic development	6	0.102328	-1	0.201128	1	0.648
post-translational protein modification	21	0.0341743	-0.0634337	0.146805	0.610724	0.904
cation transmembrane transporter activity	11	0.293653	-0.51264	0.186381	0.998663	0.276
voltage-gated ion channel activity	6	0.272737	-1	0.179925	1	0.369
voltage-gated channel activity	6	0.272737	-1	0.209029	0.999945	0.385
metal ion transmembrane transporter activity	8	0.205341	-0.986914	0.198746	0.995641	0.483
extrinsic to membrane	5	0.180915	-1	0.181466	1	0.502
embryonic development ending in birth or egg hatching	6	0.102328	-0.974824	0.186814	1	0.629
biopolymer metabolic process	46	0.0901506	-0.00817709	0.112969	0.408775	0.644
synaptic transmission	6	0.12154	-1	0.179925	1	0.591
muscle fiber development	4	-0.314025	-1	0.161308	1	0.943
skeletal muscle fiber development	4	-0.314025	-1	0.154477	1	0.941
substrate-specific transporter activity	17	0.241829	-0.11084	0.159624	0.771097	0.268
basolateral plasma membrane	4	0.0475092	-1	0.123659	1	0.584
kinase activity	15	0.170328	-0.18589	0.165867	0.758831	0.487
Palmitate	7	0.238777	-0.989275	0.203094	0.999363	0.437
Cytoskeleton	2	0.300488	-1	0	1	0.129
G protein alpha subunit, helical insertion	3	0.180915	-1	0.0220426	1	0.378
nucleotide binding	25	0.158466	-0.0368397	0.135443	0.507636	0.433
neurotransmitter metabolic process	2	-0.202653	-1	0	1	0.931
phosphoric monoester hydrolase	3	-0.00246837	-1	0.0222517	1	0.833
neuron differentiation	8	0.239446	-1	0.195087	0.901281	0.423
dorsal/ventral pattern formation	4	0.260232	-1	0.154477	1	0.357
cell-cell signaling	7	0.158108	-0.918314	0.195098	1	0.566
IGc2	7	0.0594758	-0.974759	0.20028	1	0.732
binding	89	0.121807	0.0441047	0.113667	0.298812	0.43
transferase activity, transferring phosphorus-containing groups	16	0.184857	-0.246465	0.167125	0.673278	0.44
muscle development	5	-0.301934	-1	0.176754	1	0.955
Guanine nucleotide binding protein (G-protein), alpha subunit	3	0.180915	-1	0.0220426	1	0.378
ligand-gated channel activity	5	0.263479	-1	0.172716	1	0.37
ligand-gated ion channel activity	5	0.263479	-1	0.171868	1	0.371
Protein kinase, C-terminal	4	0.482972	-1	0.138736	1	0.175
PIRSF002400:GTP-binding regulatory protein Gs alpha chain	3	0.180915	-1	0.00503873	1	0.368
microtubule-based process	5	0.18446	-1	0.181466	1	0.496
serotonin receptor activity	2	-0.0946934	-1	0	1	0.909
positive regulation of metabolic process	8	0.0864281	-1	0.201791	1	0.701
transmission of nerve impulse	6	0.12154	-1	0.179925	1	0.591
regulation of postsynaptic membrane potential	2	0.208347	-1	0	1	0.211
GTPase activity	5	0.180915	-1	0.176754	1	0.494
Neuroactive ligand-receptor interaction	7	0.37312	-0.989275	0.202062	0.999363	0.239
intracellular organelle part	25	0.10336	-0.0368397	0.135443	0.507636	0.612
amine receptor activity	3	-0.118797	-1	0	1	0.886
Potassium channel	3	0.33524	-1	0.0222517	1	0.243
domain:AGC-kinase C-terminal	4	0.482972	-1	0.161308	1	0.159
organelle part	25	0.10336	-0.0319688	0.138964	0.598875	0.627
Immunoglobulin I-set	5	0.0846975	-1	0.181466	1	0.63
ATP	5	0.420679	-1	0.172716	1	0.209
DNA binding	5	0.0788155	-1	0.171868	1	0.609
phosphoprotein phosphatase activity	5	0.0163223	-0.997922	0.174619	1	0.715
DNA binding	21	0.0756917	-0.0958362	0.154299	0.693995	0.736
S_TKc	8	0.19766	-0.989275	0.195793	0.999363	0.495
tube morphogenesis	5	0.171274	-1	0.172716	1	0.502
plasma membrane fusion	2	1.38778e-17	-1	0	1	0.327
Potassium channel, voltage dependent, Kv	2	0.586438	-1	0	1	0.079
regulation of neurotransmitter levels	3	-0.152217	-1	0.00503873	1	0.906
adenyl ribonucleotide binding	18	0.170837	-0.131046	0.162939	0.723138	0.466
positive regulation of nucleobase, nucleoside, nucleotide and nucleic acid metabolic process	6	0.00618196	-1	0.201128	1	0.814
tyrosine-protein kinase	4	-0.0480311	-1	0.135186	1	0.84
microtubule cytoskeleton	6	0.120914	-0.974759	0.191068	1	0.62
potassium ion transport	5	0.222147	-1	0.181067	1	0.436
S_TK_X	4	0.482972	-1	0.127138	1	0.16
skeletal muscle development	4	-0.314025	-1	0.120591	1	0.932
Tyrosine protein kinase	4	-0.0400331	-1	0.136615	1	0.832
protein binding	56	0.101939	0.0110529	0.108433	0.330172	0.553
protein modification process	21	0.0341743	-0.107847	0.152423	0.618864	0.921
tyrosine-specific phosphatase	2	0.0259905	-1	0	1	0.271
Cyclic nucleotide-binding	3	0.612748	-1	0	1	0.09
positive regulation of cellular metabolic process	7	0.0871507	-0.974759	0.198744	1	0.694
cell projection organization and biogenesis	7	0.189359	-0.989275	0.203094	0.999363	0.521
cell projection morphogenesis	7	0.189359	-0.918314	0.194343	1	0.512
cell part morphogenesis	7	0.189359	-0.974759	0.198744	1	0.523
short sequence motif:Octapeptide motif	2	-0.0514493	-1	0	1	0.923
immunoglobulin domain	8	0.0583478	-1	0.195087	0.901281	0.757
sensory perception of light stimulus	5	0.344369	-1	0.181466	1	0.29
circulatory system process	5	0.226318	-1	0.172716	1	0.426
blood circulation	5	0.226318	-1	0.171868	1	0.422
nucleobase, nucleoside, nucleotide and nucleic acid metabolic process	34	0.077226	-0.0240729	0.11845	0.453752	0.7
neurological system process	12	0.206664	-0.268664	0.188289	0.982593	0.46
enzyme linked receptor protein signaling pathway	6	-0.115359	-1	0.19704	1	0.921
phosphotransferase	4	0.40993	-1	0.154477	1	0.226
multicellular organismal response to stress	2	0	-1	0	1	0.307
neuron development	6	0.247131	-0.974759	0.191068	1	0.414
glycosylation site:N-linked (GlcNAc...)	28	0.0170969	-0.0465622	0.125798	0.579119	0.974
Serine/threonine protein kinase	5	0.614054	-1	0.201452	1	0.097
domain:RGS	3	0	-1	0.0220426	1	0.519
heart development	4	0.100618	-1	0.123659	1	0.529
gene expression	31	0.0882739	-0.0442001	0.119627	0.580129	0.648
intracellular signaling cascade	17	0.0688456	-0.247898	0.163705	0.689836	0.774
cellular chemical homeostasis	5	0.0188824	-1	0.176754	1	0.719
cellular ion homeostasis	5	0.0188824	-1	0.181067	1	0.739
adenyl nucleotide binding	18	0.170837	-0.10882	0.155988	0.74419	0.458
voltage-gated cation channel activity	4	0.276848	-1	0.120591	1	0.322
negative regulation of biological process	14	0.00891791	-0.18586	0.167341	0.823425	0.94
ATP binding	17	0.170802	-0.247898	0.163705	0.689836	0.479
in utero embryonic development	3	0	-1	0.0220426	1	0.519
monovalent inorganic cation transport	7	0.214876	-0.918314	0.195098	1	0.462
regulation of apoptosis	7	0.0381439	-0.974759	0.20028	1	0.765
biopolymer modification	21	0.0341743	-0.143468	0.141055	0.573582	0.913
Calcium signaling pathway	6	0.306023	-1	0.209029	0.999945	0.341
RNA metabolic process	26	0.0756653	-0.0336763	0.143441	0.553387	0.746
focal adhesion	3	0	-1	0.0220426	1	0.519
somatotropin secreting cell differentiation	2	-0.0257137	-1	0	1	0.9
receptor	18	0.0499527	-0.170219	0.161952	0.686882	0.839
gland development	3	-0.0257137	-1	0.0220426	1	0.848
learning and/or memory	3	0.0858975	-1	2.498e-16	1	0.418
Regulator of G protein signalling	3	0	-1	0	1	0.495
regulation of programmed cell death	7	0.0381439	-0.981528	0.191836	1	0.78
negative regulation of cellular process	13	0.0113871	-0.258806	0.18323	0.874294	0.938
LIM	3	0.198792	-1	0	1	0.358
guanyl ribonucleotide binding	7	0.365227	-0.989275	0.203094	0.999363	0.25
Voltage-dependent potassium channel	2	0.586438	-1	0	1	0.058
membrane fusion	2	1.38778e-17	-1	0	1	0.312
guanyl nucleotide binding	7	0.365227	-1	0.203438	0.999945	0.237
microtubule cytoskeleton organization and biogenesis	3	0	-1	0.0220426	1	0.519
kidney development	4	0	-1	0.135186	1	0.668
Heme NO binding associated	2	-0.323835	-1	0	1	0.948
transporter activity	18	0.227819	-0.170219	0.161952	0.686882	0.314
neurotransmitter transport	3	0.0685015	-1	0	1	0.441
cell-substrate adherens junction	3	0	-1	0.0220426	1	0.519
cNMP	3	0.612748	-1	2.498e-16	1	0.094
topological domain:Lumenal, vesicle	2	0.606471	-1	0	1	0.076
ion homeostasis	5	0.0188824	-1	0.201452	1	0.739
lipoprotein	10	0.301804	-0.989275	0.198858	0.865943	0.273
urogenital system development	4	0	-1	0.154477	1	0.686
potassium transport	3	0.33524	-1	2.498e-16	1	0.227
tube development	5	0.171274	-1	0.171868	1	0.503
positive regulation of transcription	5	0.00377407	-0.997922	0.174619	1	0.731
striated muscle development	4	-0.314025	-1	0.161308	1	0.943
cgmp-binding	2	0.610424	-1	0	1	0.087
Protein-tyrosine phosphatase, receptor/non-receptor type	2	0.0259905	-1	0	1	0.241
Tyrosine protein kinase, active site	3	-0.0407466	-1	0	1	0.86
cell-matrix junction	3	0	-1	0.0222517	1	0.518
domain:Ig-like C2-type 5	3	0.209029	-1	0.00503873	1	0.346
ion transport	12	0.217758	-0.358627	0.18317	0.820383	0.42
glycine binding	2	0.589017	-1	0	1	0.09
axon guidance	3	0.223912	-1	0	1	0.293
ureteric bud development	3	0	-1	0.0222517	1	0.518
neurotransmitter receptor	2	-0.0946934	-1	0	1	0.929
negative regulation of transcription	5	0.218511	-1	0.181466	1	0.443
localization	30	0.0717442	-0.0398253	0.128423	0.543138	0.735
TyrKc	4	-0.0400331	-1	0.123659	1	0.828
righting reflex	2	-1	-1	0	1	1
potassium	3	0.33524	-1	0	1	0.221
RGS	3	0	-1	0	1	0.488
neurite development	5	0.217639	-0.974759	0.175235	1	0.44
transmembrane receptor protein serine/threonine kinase signaling pathway	3	0	-1	1.11022e-16	1	0.501
neurogenesis	4	0.217215	-1	0.154646	1	0.427
voltage-gated potassium channel activity	3	0.33524	-1	0.0129017	1	0.257
protein tyrosine phosphatase activity	3	0.0178747	-1	0	1	0.477
Potassium channel, voltage dependent, Kv, tetramerisation	2	0.586438	-1	0	1	0.057
Fibronectin, type III-like fold	5	0.0615553	-0.974759	0.175235	1	0.646
Fibronectin, type III	5	0.0615553	-1	0.198867	1	0.689
domain:Ig-like C2-type 2	4	0.247312	-1	0.154477	1	0.375
domain:Ig-like C2-type 1	4	0.247312	-1	0.135186	1	0.364
cyclic nucleotide metabolic process	3	-0.20877	-1	0	1	0.91
Immunoglobulin-like	7	0.0552809	-0.981528	0.191836	1	0.738
G-protein coupled receptor protein signaling pathway	14	0.135774	-0.251059	0.175051	0.872542	0.608
positive regulation of transcription, DNA-dependent	4	-0.00900299	-1	0.154846	1	0.811
cell morphogenesis	9	0.189747	-0.989275	0.193048	0.992642	0.507
cellular structure morphogenesis	9	0.189747	-0.907855	0.1903	0.993386	0.502
positive regulation of biological process	12	0.0819755	-0.279332	0.178711	0.975741	0.729
chloride channel	3	-1	-1	0.0178932	1	0.996
domain:Ig-like C2-type 4	3	0.209029	-1	1.11022e-16	1	0.339
domain:LIM zinc-binding 2	2	0.307437	-1	0	1	0.159
domain:LIM zinc-binding 1	2	0.307437	-1	0	1	0.125
regulation of heart contraction	3	0.198161	-1	0	1	0.313
response to organic substance	2	0.208347	-1	0	1	0.195
differentiation	7	0.281494	-1	0.203438	0.999945	0.349
GPCR, family 3, metabotropic glutamate receptor	2	0.428985	-1	0	1	0.103
adenohypophysis development	2	-0.0257137	-1	0	1	0.911
receptor activity	21	0.0485627	-0.143468	0.141055	0.573582	0.852
glutamate receptor activity	3	0.391241	-1	1.11022e-16	1	0.195
tyrosine-specific protein kinase	2	0	-1	0	1	0.329
cell	92	0.112074	0.0373033	0.116077	0.346512	0.546
cell part	92	0.112074	0.0378316	0.115845	0.358773	0.542
negative regulation of nucleobase, nucleoside, nucleotide and nucleic acid metabolic process	5	0.218511	-0.974759	0.175235	1	0.439
myoblast differentiation	2	-0.319502	-1	0	1	0.953
phosphoric monoester hydrolase activity	5	0.0163223	-1	0.173506	1	0.72
cGMP binding	2	0.610424	-1	0	1	0.087
GMP binding	2	0.610424	-1	0	1	0.055
negative regulation of signal transduction	4	0.0594913	-1	0.138736	1	0.584
regulation of multicellular organismal process	6	0.040174	-1	0.200125	1	0.75
Immunoglobulin-like fold	7	0.0594758	-0.918314	0.194343	1	0.728
chloride	3	-1	-1	0	1	0.995
potassium ion binding	3	0.33524	-1	0.0178932	1	0.237
PTPc	2	0.0259905	-1	0	1	0.279
axonogenesis	4	0.248232	-1	0.151344	1	0.371
synaptosome	2	1.85615e-16	-1	0	1	0.255
negative regulation of metabolic process	6	0.218511	-0.974759	0.1877	1	0.449
anti-apoptosis	2	1.11022e-16	-1	0	1	0.294
heart contraction	3	0.198161	-1	0	1	0.332
heart process	3	0.198161	-1	0	1	0.313
GTP-binding	5	0.232855	-0.974759	0.175235	1	0.418
alkali metal ion binding	4	0.331953	-1	0.156615	1	0.294
topological domain:Extracellular	18	0.00512368	-0.11708	0.162826	0.642994	0.973
positive regulation of cellular process	11	0.0822104	-0.989275	0.19382	0.858357	0.736
chemical homeostasis	5	0.0188824	-1	0.181067	1	0.739
microtubule	3	0.4045	-1	0	1	0.184
metanephros development	3	0	-1	0	1	0.488
single fertilization	2	1.59595e-16	-1	0	1	0.269
endocrine system development	3	-0.0257137	-1	0.0129017	1	0.848
inner ear morphogenesis	3	0	-1	0	1	0.496
chloride ion binding	3	-1	-1	0	1	0.995
anion binding	3	-1	-1	0.0178932	1	0.996
topological domain:Cytoplasmic	22	0.0191878	-0.095712	0.14868	0.611363	0.959
reflex	2	-1	-1	0	1	0.997
neurotransmitter receptor activity	3	-0.0964541	-1	0	1	0.867
neurotransmitter transport	3	0.0685015	-1	0.0129017	1	0.452
sensory organ development	5	0.0437229	-1	0.169902	1	0.668
visual perception	4	0.337056	-1	0.120591	1	0.279
neurotransmitter binding	3	-0.0964541	-1	0.0178932	1	0.881
metal ion transport	7	0.20854	-1	0.203438	0.999945	0.488
neurite morphogenesis	4	0.248232	-1	0.154646	1	0.383
neuron morphogenesis during differentiation	4	0.248232	-1	0.151344	1	0.371
transducer	9	0.193976	-0.907855	0.1903	0.993386	0.491
chloride channel activity	3	-1	-1	0	1	0.995
repressor	3	0	-1	0.0178932	1	0.513
response to stimulus	22	0.0675145	-0.095712	0.14868	0.611363	0.776
Zinc finger, LIM-type	2	0.307437	-1	0	1	0.159
fertilization	2	1.59595e-16	-1	0	1	0.266
nucleoside-triphosphatase activity	7	0.129632	-0.974759	0.198744	1	0.623
Immunoglobulin subtype	5	0.502932	-0.974759	0.175235	1	0.148
cation transport	8	0.205341	-1	0.195087	0.901281	0.475
cell surface	5	0.0707503	-1	0.181466	1	0.649
regulation of cell differentiation	4	0.300776	-1	0.135186	1	0.305
voltage-gated potassium channel complex	2	0.586438	-1	0	1	0.06
cellular homeostasis	5	0.0188824	-0.997922	0.174619	1	0.71
ear morphogenesis	3	0	-1	0.00503873	1	0.506
Cleavage on pair of basic residues	4	0.0414039	-1	0.151344	1	0.629
transport	15	0.247693	-0.118231	0.167325	0.832709	0.29
BTB/POZ fold	3	0.586438	-1	0	1	0.084
apoptosis	8	0.0391444	-0.971347	0.196666	1	0.799
transferase	14	0.154484	-0.251059	0.175051	0.872542	0.562

## Sheet: Rodent corr out
Rodent covariation correlation - Outgoing
Limited to genes for which there are orthologs in the worm data
	Efferent
		Source genes	Random genes of same size
Functional annotation	Size	Correlation	Min Corr	Median Corr	Max Corr	P-value
Homeobox	13	0.110085	-0.00310163	0.199627	0.413211	0.914
DNA-binding region:Homeobox	12	0.0914723	0.00916767	0.196957	0.424098	0.942
nervous system development	20	0.18318	0.0479892	0.244333	0.446246	0.814
protein complex	30	0.254561	0.0851706	0.267234	0.43335	0.589
multicellular organismal process	49	0.219763	0.139075	0.294825	0.425633	0.94
cell communication	47	0.262215	0.121254	0.291984	0.428182	0.744
transcription factor complex	14	0.0820953	0.00535179	0.207946	0.419231	0.97
macromolecular complex	32	0.222316	0.0724091	0.274212	0.442439	0.824
nucleoplasm part	15	0.11938	0.00218563	0.217656	0.401549	0.922
HOX	11	0.0957798	-0.017764	0.185611	0.445021	0.888
system development	32	0.194484	0.0995158	0.270147	0.42116	0.891
multicellular organismal development	38	0.229025	0.0730497	0.278832	0.428644	0.827
signal transduction	43	0.275198	0.109613	0.285981	0.44404	0.585
nucleoplasm	15	0.11938	-0.00817839	0.216335	0.439682	0.927
Homeobox	9	0.0869127	-0.0294997	0.175165	0.39894	0.873
Helix-turn-helix motif, lambda-like repressor	7	0.0155436	-0.0276451	0.147343	0.437529	0.981
sequence-specific DNA binding	14	0.106501	0.00536074	0.20773	0.410213	0.932
anatomical structure development	34	0.21978	0.111403	0.270688	0.421044	0.831
cell surface receptor linked signal transduction	28	0.193387	0.0669409	0.265846	0.446315	0.886
Homeodomain-related	8	0.0871487	-0.0175507	0.166117	0.391943	0.846
regulation of biological process	50	0.252088	0.14206	0.294983	0.416143	0.818
Gap junction	7	0.125605	-0.0227147	0.159325	0.380702	0.662
nuclear lumen	15	0.11938	0.0125022	0.211889	0.406015	0.908
gated channel activity	11	0.251058	-0.0266683	0.190552	0.423533	0.19
regulation of cellular metabolic process	34	0.194045	0.0814153	0.27895	0.445637	0.935
transcription factor activity	16	0.0987071	0.0335466	0.219804	0.403587	0.958
regulation of metabolic process	35	0.222789	0.076035	0.274236	0.421623	0.835
biological regulation	53	0.25199	0.165844	0.300186	0.429032	0.845
membrane-enclosed lumen	16	0.112845	0.0277821	0.217366	0.423562	0.948
organelle lumen	16	0.112845	0.00534022	0.223955	0.440396	0.948
regulation of cellular process	47	0.247117	0.149623	0.292842	0.435865	0.834
nucleotide-binding	23	0.227334	0.0655548	0.245542	0.412817	0.607
ion channel activity	12	0.247346	-0.0131628	0.198399	0.400196	0.263
organ development	26	0.17018	0.0413551	0.253477	0.405035	0.922
behavior	11	0.162548	-0.0266683	0.190552	0.423533	0.637
plasma membrane part	24	0.338907	0.0647183	0.255246	0.442486	0.079
pattern specification process	10	0.071676	-0.00535259	0.184641	0.398414	0.947
Transcription regulation	18	0.23997	0.0406906	0.227055	0.426308	0.426
transcription regulator activity	20	0.132253	0.0232878	0.234634	0.396589	0.943
substrate specific channel activity	12	0.247346	0.00916767	0.196957	0.424098	0.236
embryonic morphogenesis	8	0.054765	-0.0339007	0.16732	0.397886	0.942
Developmental protein	15	0.168983	0.00218563	0.217656	0.401549	0.739
generation of neurons	10	0.128347	-0.0196926	0.178072	0.453944	0.739
Transcription	18	0.23997	0.0332704	0.230582	0.434244	0.451
Ionic channel	10	0.264382	-0.0258937	0.180552	0.431371	0.135
domain:Protein kinase	12	0.209873	0.00916767	0.196957	0.424098	0.415
protein serine/threonine kinase activity	13	0.185278	0.0018365	0.208132	0.446032	0.613
regulation of nucleobase, nucleoside, nucleotide and nucleic acid metabolic process	31	0.212474	0.0869208	0.26914	0.437697	0.84
central nervous system development	8	0.0350326	-0.0316991	0.160067	0.446819	0.965
cell migration	9	0.11693	-0.0327719	0.175498	0.401109	0.774
amino acid binding	3	0.0898665	-0.0809307	0.0908252	0.389253	0.503
developmental process	41	0.215471	0.125482	0.288674	0.430013	0.912
protein-tyrosine kinase activity	11	0.189873	-0.00377962	0.193274	0.388554	0.522
locomotory behavior	9	0.190622	-0.0183144	0.170233	0.444307	0.395
anatomical structure morphogenesis	22	0.171209	0.0632784	0.245251	0.437273	0.88
passive transmembrane transporter activity	12	0.247346	-0.00824882	0.195262	0.425805	0.225
channel activity	12	0.247346	0.00916767	0.196957	0.424098	0.236
regulation of transcription	30	0.204539	0.0689957	0.270921	0.443807	0.867
neurogenesis	10	0.128347	-0.00535259	0.184641	0.398414	0.755
neuron migration	4	0.117515	-0.0747696	0.11181	0.412435	0.477
binding site:ATP	12	0.209873	-0.00824882	0.195262	0.425805	0.424
integral to plasma membrane	14	0.318726	0.00535179	0.207946	0.419231	0.057
cell development	20	0.154203	0.0479892	0.244333	0.446246	0.909
intrinsic to plasma membrane	14	0.318726	0.00710352	0.213909	0.39988	0.059
heterotrimeric G-protein complex	5	0.110831	-0.0694488	0.1278	0.42373	0.564
nuclear part	17	0.0665291	0.0281476	0.225761	0.446205	0.991
protein kinase activity	14	0.192769	0.00536074	0.20773	0.410213	0.585
transcription	30	0.204539	0.0833737	0.262648	0.421926	0.847
substrate-specific transmembrane transporter activity	17	0.293579	0.0133782	0.228067	0.441442	0.157
phosphate metabolic process	17	0.20586	0.0439565	0.226133	0.40741	0.617
phosphorus metabolic process	17	0.20586	0.00742948	0.220497	0.43169	0.586
embryonic limb morphogenesis	4	-0.0419657	-0.0846838	0.114524	0.35984	0.993
embryonic appendage morphogenesis	4	-0.0419657	-0.0616446	0.117993	0.394287	0.995
organ morphogenesis	12	0.0977636	-0.0086508	0.198464	0.451121	0.922
cell differentiation	27	0.140021	0.0600347	0.261229	0.431988	0.982
cellular developmental process	27	0.140021	0.0660418	0.256064	0.425283	0.974
dna-binding	17	0.189485	0.0281476	0.225761	0.446205	0.704
limb morphogenesis	4	-0.0419657	-0.0846838	0.114524	0.35984	0.993
appendage morphogenesis	4	-0.0419657	-0.0616446	0.117993	0.394287	0.995
voltage-gated channel	6	0.256027	-0.0478965	0.145277	0.375113	0.095
cell motility	9	0.11693	-0.0294997	0.175165	0.39894	0.774
localization of cell	9	0.11693	-0.0183144	0.170233	0.444307	0.75
ion transmembrane transporter activity	15	0.287151	0.0125022	0.211889	0.406015	0.134
plasma membrane	26	0.338809	0.0766642	0.254423	0.415612	0.074
limb development	4	-0.0419657	-0.0499201	0.118674	0.374481	0.996
appendage development	4	-0.0419657	-0.0490301	0.111539	0.380693	0.999
kinase	14	0.17397	0.00940083	0.20521	0.455693	0.654
regulation of gene expression	30	0.204539	0.0975432	0.267174	0.417942	0.844
Serine/threonine-protein kinase	10	0.139314	-0.0258937	0.180552	0.431371	0.72
transmembrane transporter activity	18	0.315423	0.0411844	0.226878	0.399872	0.093
protein amino acid phosphorylation	14	0.178613	-0.0187004	0.211285	0.448027	0.683
Long-term depression	6	0.168571	-0.0500086	0.144645	0.389157	0.383
Serine/threonine protein kinase, active site	8	0.100553	-0.0316991	0.160067	0.446819	0.767
adult locomotory behavior	4	0.116128	-0.0846838	0.114524	0.35984	0.493
potassium channel activity	6	0.272112	-0.0426589	0.144395	0.40435	0.052
amine binding	3	0.0898665	-0.0820644	0.0897752	0.386673	0.499
dopamine receptor signaling pathway	3	0.0750354	-0.0792886	0.0922402	0.35096	0.585
Ion transport	5	0.253807	-0.0694488	0.1278	0.42373	0.077
ion transport	11	0.212851	-0.0119734	0.191026	0.40454	0.391
purine ribonucleotide binding	24	0.232901	0.0285138	0.249062	0.404467	0.601
ribonucleotide binding	24	0.232901	0.0653448	0.247875	0.409354	0.602
regulation of transcription, DNA-dependent	26	0.165372	0.0728141	0.260359	0.444529	0.933
extrinsic to plasma membrane	5	0.110831	-0.0546213	0.128676	0.391479	0.587
cation channel activity	8	0.269608	-0.0316991	0.160067	0.446819	0.088
nucleotide phosphate-binding region:ATP	14	0.209489	0.00536074	0.20773	0.410213	0.489
phosphotransferase activity, alcohol group as acceptor	14	0.192769	0.00535179	0.207946	0.419231	0.584
atp-binding	17	0.203642	0.0133782	0.228067	0.441442	0.638
active site:Proton acceptor	12	0.201521	0.00313891	0.200951	0.399499	0.497
system process	17	0.14874	0.00742948	0.220497	0.43169	0.861
transcription, DNA-dependent	26	0.165372	0.0754754	0.255791	0.423869	0.929
Immunoglobulin subtype 2	7	0.117117	-0.0369427	0.159108	0.399167	0.693
RNA biosynthetic process	26	0.165372	0.0766642	0.254423	0.415612	0.925
Protein kinase, core	9	0.084627	-0.0304434	0.176599	0.426031	0.887
protein phosphatase	5	0.127511	-0.0546213	0.128676	0.391479	0.507
regulation of membrane potential	4	0.0634432	-0.0747696	0.11181	0.412435	0.733
brain development	6	0.0422734	-0.0616323	0.145858	0.399887	0.912
purine nucleotide binding	24	0.232901	0.0653448	0.247875	0.409354	0.602
negative regulation of apoptosis	5	0.0618867	-0.048866	0.1357	0.369836	0.815
glycoprotein	34	0.210553	0.112599	0.275333	0.433565	0.869
regionalization	6	0.0418384	-0.0373884	0.139591	0.431613	0.907
molecular transducer activity	29	0.142485	0.0928041	0.264271	0.437313	0.98
signal transducer activity	29	0.142485	0.051247	0.258475	0.409443	0.977
embryonic development	10	0.0779887	-0.0281989	0.181101	0.409033	0.92
negative regulation of programmed cell death	5	0.0618867	-0.048866	0.1357	0.369836	0.815
forebrain development	4	-0.00222353	-0.0490301	0.111539	0.380693	0.96
phosphorylation	14	0.178613	0.00940083	0.20521	0.455693	0.64
adult behavior	4	0.116128	-0.0846838	0.114524	0.35984	0.493
heart morphogenesis	2	0.00258921	-0.116501	0.0471333	0.397509	0.786
chordate embryonic development	6	0.000231584	-0.0478965	0.145277	0.375113	0.983
post-translational protein modification	21	0.199512	0.0596196	0.240497	0.419394	0.746
cation transmembrane transporter activity	11	0.287824	-0.017764	0.185611	0.445021	0.088
voltage-gated ion channel activity	6	0.256027	-0.066248	0.144088	0.388962	0.088
voltage-gated channel activity	6	0.256027	-0.0616323	0.145858	0.399887	0.081
metal ion transmembrane transporter activity	8	0.269608	-0.0285663	0.165005	0.398223	0.086
extrinsic to membrane	5	0.110831	-0.048866	0.1357	0.369836	0.619
embryonic development ending in birth or egg hatching	6	0.000231584	-0.0500086	0.144645	0.389157	0.985
biopolymer metabolic process	46	0.220739	0.128717	0.291811	0.425612	0.931
synaptic transmission	6	0.0447481	-0.0616323	0.145858	0.399887	0.908
muscle fiber development	4	0.0454044	-0.0616446	0.117993	0.394287	0.821
skeletal muscle fiber development	4	0.0454044	-0.0499201	0.118674	0.374481	0.806
substrate-specific transporter activity	17	0.293579	0.0439565	0.226133	0.40741	0.153
basolateral plasma membrane	4	-0.0115237	-0.0747696	0.11181	0.412435	0.973
kinase activity	15	0.181738	0.00797752	0.217234	0.422976	0.698
Palmitate	7	0.108333	-0.0369427	0.159108	0.399167	0.734
Cytoskeleton	2	-0.0254447	-0.116501	0.0471333	0.397509	0.926
G protein alpha subunit, helical insertion	3	0.0877444	-0.0820644	0.0897752	0.386673	0.508
nucleotide binding	25	0.238627	0.0638308	0.253852	0.434929	0.589
neurotransmitter metabolic process	2	0.112286	-0.0980925	0.0509029	0.341306	0.252
phosphoric monoester hydrolase	3	0.2374	-0.0818384	0.0868665	0.374573	0.048
neuron differentiation	8	0.0966825	-0.0285663	0.165005	0.398223	0.824
dorsal/ventral pattern formation	4	-0.0520506	-0.0499201	0.118674	0.374481	1
cell-cell signaling	7	0.0462423	-0.0533737	0.154581	0.394712	0.94
IGc2	7	0.117117	-0.0276451	0.147343	0.437529	0.654
binding	89	0.287091	0.197723	0.328103	0.448684	0.843
transferase activity, transferring phosphorus-containing groups	16	0.18041	0.0149496	0.215436	0.402431	0.71
muscle development	5	0.0569107	-0.059172	0.134565	0.396061	0.842
Guanine nucleotide binding protein (G-protein), alpha subunit	3	0.0877444	-0.0820644	0.0897752	0.386673	0.508
ligand-gated channel activity	5	0.024325	-0.0546213	0.128676	0.391479	0.946
ligand-gated ion channel activity	5	0.024325	-0.0694488	0.1278	0.42373	0.918
Protein kinase, C-terminal	4	0.0953795	-0.0846838	0.114524	0.35984	0.581
PIRSF002400:GTP-binding regulatory protein Gs alpha chain	3	0.0877444	-0.0809307	0.0908252	0.389253	0.511
microtubule-based process	5	0.216555	-0.048866	0.1357	0.369836	0.166
serotonin receptor activity	2	0.0300079	-0.104524	0.0516097	0.36577	0.634
positive regulation of metabolic process	8	0.147284	-0.0316991	0.160067	0.446819	0.551
transmission of nerve impulse	6	0.0447481	-0.066248	0.144088	0.388962	0.896
regulation of postsynaptic membrane potential	2	0.00589641	-0.0739216	0.0522423	0.404741	0.77
GTPase activity	5	0.2726	-0.059172	0.134565	0.396061	0.045
Neuroactive ligand-receptor interaction	7	0.1271	-0.0335326	0.156327	0.386031	0.645
intracellular organelle part	25	0.196524	0.0638308	0.253852	0.434929	0.819
amine receptor activity	3	0.00416278	-0.0912582	0.0870404	0.362841	0.893
Potassium channel	3	0.257334	-0.0818384	0.0868665	0.374573	0.031
domain:AGC-kinase C-terminal	4	0.0953795	-0.0616446	0.117993	0.394287	0.596
organelle part	25	0.196524	0.0748567	0.258632	0.448029	0.85
Immunoglobulin I-set	5	0.00904368	-0.0546213	0.128676	0.391479	0.971
ATP	5	0.193335	-0.0694488	0.1278	0.42373	0.231
DNA binding	5	0.0990214	-0.0813693	0.130547	0.40827	0.659
phosphoprotein phosphatase activity	5	0.127511	-0.0671499	0.128872	0.364128	0.507
DNA binding	21	0.182111	0.0701314	0.238222	0.417123	0.821
S_TKc	8	0.140057	-0.0339007	0.16732	0.397886	0.636
tube morphogenesis	5	0.0609377	-0.0546213	0.128676	0.391479	0.815
plasma membrane fusion	2	0.00993279	-0.0980925	0.0509029	0.341306	0.753
Potassium channel, voltage dependent, Kv	2	0.21017	-0.0739216	0.0522423	0.404741	0.043
regulation of neurotransmitter levels	3	0.0803596	-0.0809307	0.0908252	0.389253	0.551
adenyl ribonucleotide binding	18	0.21261	0.016524	0.234427	0.438673	0.613
positive regulation of nucleobase, nucleoside, nucleotide and nucleic acid metabolic process	6	0.156224	-0.0500086	0.144645	0.389157	0.444
tyrosine-protein kinase	4	0.169382	-0.0747696	0.11181	0.412435	0.276
microtubule cytoskeleton	6	0.199452	-0.066248	0.144088	0.388962	0.245
potassium ion transport	5	0.26755	-0.0546213	0.128676	0.391479	0.055
S_TK_X	4	0.0953795	-0.0747696	0.11181	0.412435	0.572
skeletal muscle development	4	0.0454044	-0.0846838	0.114524	0.35984	0.808
Tyrosine protein kinase	4	0.0910548	-0.0616446	0.117993	0.394287	0.615
protein binding	56	0.266292	0.165506	0.304015	0.424996	0.787
protein modification process	21	0.199512	0.0551184	0.239333	0.413927	0.717
tyrosine-specific phosphatase	2	0.256462	-0.0883823	0.0455759	0.360232	0.016
Cyclic nucleotide-binding	3	0.0574125	-0.0818384	0.0868665	0.374573	0.669
positive regulation of cellular metabolic process	7	0.14999	-0.0429301	0.156384	0.413905	0.545
cell projection organization and biogenesis	7	0.14287	-0.0335326	0.156327	0.386031	0.583
cell projection morphogenesis	7	0.14287	-0.0533737	0.154581	0.394712	0.561
cell part morphogenesis	7	0.14287	-0.0276451	0.147343	0.437529	0.525
short sequence motif:Octapeptide motif	2	0.0712111	-0.0739216	0.0522423	0.404741	0.403
immunoglobulin domain	8	0.108102	-0.0285663	0.165005	0.398223	0.784
sensory perception of light stimulus	5	0.119296	-0.048866	0.1357	0.369836	0.573
circulatory system process	5	0.144208	-0.0546213	0.128676	0.391479	0.425
blood circulation	5	0.144208	-0.0694488	0.1278	0.42373	0.418
nucleobase, nucleoside, nucleotide and nucleic acid metabolic process	34	0.189665	0.105641	0.273498	0.416388	0.926
neurological system process	12	0.0597196	-0.00824882	0.195262	0.425805	0.977
enzyme linked receptor protein signaling pathway	6	0.0579234	-0.0426589	0.144395	0.40435	0.876
phosphotransferase	4	0.163347	-0.0499201	0.118674	0.374481	0.307
multicellular organismal response to stress	2	0.0160981	-0.104524	0.0516097	0.36577	0.714
neuron development	6	0.0813483	-0.0373884	0.139591	0.431613	0.749
glycosylation site:N-linked (GlcNAc...)	28	0.199225	0.0414663	0.256463	0.40672	0.849
Serine/threonine protein kinase	5	0.0580535	-0.059172	0.134565	0.396061	0.838
domain:RGS	3	0.00664365	-0.0820644	0.0897752	0.386673	0.888
heart development	4	0.141185	-0.0747696	0.11181	0.412435	0.393
gene expression	31	0.182324	0.0999653	0.268038	0.420774	0.922
intracellular signaling cascade	17	0.231067	0.0220504	0.220049	0.391735	0.444
cellular chemical homeostasis	5	0.0540582	-0.059172	0.134565	0.396061	0.851
cellular ion homeostasis	5	0.0540582	-0.048866	0.1357	0.369836	0.836
adenyl nucleotide binding	18	0.21261	0.0411673	0.229772	0.418817	0.598
voltage-gated cation channel activity	4	0.25523	-0.0747696	0.11181	0.412435	0.052
negative regulation of biological process	14	0.21775	0.00536074	0.20773	0.410213	0.451
ATP binding	17	0.203642	0.0400903	0.222779	0.420848	0.601
in utero embryonic development	3	0.0675878	-0.0820644	0.0897752	0.386673	0.614
monovalent inorganic cation transport	7	0.214262	-0.0533737	0.154581	0.394712	0.247
regulation of apoptosis	7	0.106575	-0.0276451	0.147343	0.437529	0.687
biopolymer modification	21	0.199512	0.0645001	0.24307	0.434363	0.751
Calcium signaling pathway	6	0.107322	-0.0616323	0.145858	0.399887	0.682
RNA metabolic process	26	0.165372	0.0766642	0.254423	0.415612	0.925
focal adhesion	3	-0.0194217	-0.0820644	0.0897752	0.386673	0.968
somatotropin secreting cell differentiation	2	-0.0159648	-0.104524	0.0516097	0.36577	0.9
receptor	18	0.113869	0.0411844	0.226878	0.399872	0.956
gland development	3	-0.00767574	-0.0820644	0.0897752	0.386673	0.933
learning and/or memory	3	0.0227355	-0.0792886	0.0922402	0.35096	0.826
Regulator of G protein signalling	3	0.00664365	-0.0912582	0.0870404	0.362841	0.886
regulation of programmed cell death	7	0.106575	-0.0227147	0.159325	0.380702	0.736
negative regulation of cellular process	13	0.209396	-0.00310163	0.199627	0.413211	0.443
LIM	3	0.00329562	-0.0809307	0.0908252	0.389253	0.903
guanyl ribonucleotide binding	7	0.16538	-0.0335326	0.156327	0.386031	0.46
Voltage-dependent potassium channel	2	0.21017	-0.104524	0.0516097	0.36577	0.046
membrane fusion	2	0.00993279	-0.0739216	0.0522423	0.404741	0.74
guanyl nucleotide binding	7	0.16538	-0.0429301	0.156384	0.413905	0.46
microtubule cytoskeleton organization and biogenesis	3	0.161952	-0.0820644	0.0897752	0.386673	0.224
kidney development	4	0.0934205	-0.0490301	0.111539	0.380693	0.586
Heme NO binding associated	2	0.0517756	-0.0980925	0.0509029	0.341306	0.494
transporter activity	18	0.315423	0.0260851	0.226897	0.394049	0.09
neurotransmitter transport	3	0.251061	-0.0809307	0.0908252	0.389253	0.028
cell-substrate adherens junction	3	-0.0194217	-0.0820644	0.0897752	0.386673	0.968
cNMP	3	0.0574125	-0.0792886	0.0922402	0.35096	0.662
topological domain:Lumenal, vesicle	2	0.244201	-0.0739216	0.0522423	0.404741	0.026
ion homeostasis	5	0.0540582	-0.059172	0.134565	0.396061	0.851
lipoprotein	10	0.22588	-0.0301276	0.186414	0.448023	0.297
urogenital system development	4	0.0934205	-0.0490301	0.111539	0.380693	0.586
potassium transport	3	0.257334	-0.0912582	0.0870404	0.362841	0.032
tube development	5	0.0609377	-0.0813693	0.130547	0.40827	0.811
positive regulation of transcription	5	0.122588	-0.0671499	0.128872	0.364128	0.527
striated muscle development	4	0.0454044	-0.0846838	0.114524	0.35984	0.808
cgmp-binding	2	0.0172257	-0.116501	0.0471333	0.397509	0.691
Protein-tyrosine phosphatase, receptor/non-receptor type	2	0.256462	-0.0759199	0.0541787	0.379537	0.028
Tyrosine protein kinase, active site	3	0.118458	-0.0792886	0.0922402	0.35096	0.364
cell-matrix junction	3	-0.0194217	-0.0818384	0.0868665	0.374573	0.962
domain:Ig-like C2-type 5	3	0.0825324	-0.0809307	0.0908252	0.389253	0.544
ion transport	12	0.203453	-0.0086508	0.198464	0.451121	0.478
glycine binding	2	-0.0191472	-0.104524	0.0516097	0.36577	0.913
axon guidance	3	0.0253154	-0.126464	0.091589	0.421351	0.8
ureteric bud development	3	0.111337	-0.0818384	0.0868665	0.374573	0.394
neurotransmitter receptor	2	0.0300079	-0.116501	0.0471333	0.397509	0.592
negative regulation of transcription	5	0.0514106	-0.048866	0.1357	0.369836	0.844
localization	30	0.305548	0.0851706	0.267234	0.43335	0.245
TyrKc	4	0.0910548	-0.0747696	0.11181	0.412435	0.592
righting reflex	2	0.109253	-0.0759199	0.0541787	0.379537	0.273
potassium	3	0.257334	-0.0792886	0.0922402	0.35096	0.027
RGS	3	0.00664365	-0.0912582	0.0870404	0.362841	0.886
neurite development	5	0.08282	-0.0813693	0.130547	0.40827	0.738
transmembrane receptor protein serine/threonine kinase signaling pathway	3	0.000623122	-0.0818384	0.0868665	0.374573	0.908
neurogenesis	4	0.13791	-0.0616446	0.117993	0.394287	0.394
voltage-gated potassium channel activity	3	0.257334	-0.0820644	0.0897752	0.386673	0.043
protein tyrosine phosphatase activity	3	0.327838	-0.0792886	0.0922402	0.35096	0.002
Potassium channel, voltage dependent, Kv, tetramerisation	2	0.21017	-0.0980925	0.0509029	0.341306	0.054
Fibronectin, type III-like fold	5	0.122439	-0.0671499	0.128872	0.364128	0.528
Fibronectin, type III	5	0.122439	-0.059172	0.134565	0.396061	0.558
domain:Ig-like C2-type 2	4	0.0549692	-0.0499201	0.118674	0.374481	0.779
domain:Ig-like C2-type 1	4	0.0549692	-0.0490301	0.111539	0.380693	0.754
cyclic nucleotide metabolic process	3	0.0591276	-0.0912582	0.0870404	0.362841	0.644
Immunoglobulin-like	7	0.121522	-0.0227147	0.159325	0.380702	0.676
G-protein coupled receptor protein signaling pathway	14	0.195431	0.00536074	0.20773	0.410213	0.567
positive regulation of transcription, DNA-dependent	4	0.0585428	-0.0616446	0.117993	0.394287	0.77
cell morphogenesis	9	0.155463	-0.0304434	0.176599	0.426031	0.611
cellular structure morphogenesis	9	0.155463	-0.0294997	0.175165	0.39894	0.593
positive regulation of biological process	12	0.156657	-0.00663106	0.192358	0.444264	0.679
chloride channel	3	0.0361995	-0.0818384	0.0868665	0.374573	0.758
domain:Ig-like C2-type 4	3	0.0825324	-0.0809307	0.0908252	0.389253	0.544
domain:LIM zinc-binding 2	2	0.0313234	-0.0759199	0.0541787	0.379537	0.622
domain:LIM zinc-binding 1	2	0.0313234	-0.104524	0.0516097	0.36577	0.629
regulation of heart contraction	3	0.0488188	-0.0912582	0.0870404	0.362841	0.7
response to organic substance	2	0.00589641	-0.0883823	0.0455759	0.360232	0.767
differentiation	7	0.134737	-0.0369427	0.159108	0.399167	0.618
GPCR, family 3, metabotropic glutamate receptor	2	-0.016173	-0.116501	0.0471333	0.397509	0.888
adenohypophysis development	2	-0.0159648	-0.0759199	0.0541787	0.379537	0.9
receptor activity	21	0.11659	0.0350089	0.238463	0.401831	0.971
glutamate receptor activity	3	0.0312626	-0.0809307	0.0908252	0.389253	0.788
tyrosine-specific protein kinase	2	0.12699	-0.0759199	0.0541787	0.379537	0.22
cell	92	0.31473	0.218619	0.326573	0.4456	0.611
cell part	92	0.31473	0.215251	0.326983	0.426127	0.62
negative regulation of nucleobase, nucleoside, nucleotide and nucleic acid metabolic process	5	0.0514106	-0.0813693	0.130547	0.40827	0.846
myoblast differentiation	2	0.0809146	-0.0739216	0.0522423	0.404741	0.353
phosphoric monoester hydrolase activity	5	0.127511	-0.059172	0.134565	0.396061	0.536
cGMP binding	2	0.0172257	-0.0759199	0.0541787	0.379537	0.704
GMP binding	2	0.0172257	-0.104524	0.0516097	0.36577	0.712
negative regulation of signal transduction	4	0.0561376	-0.0846838	0.114524	0.35984	0.769
regulation of multicellular organismal process	6	0.123905	-0.0500086	0.144645	0.389157	0.596
Immunoglobulin-like fold	7	0.117117	-0.0276451	0.147343	0.437529	0.654
chloride	3	0.0361995	-0.126464	0.091589	0.421351	0.749
potassium ion binding	3	0.257334	-0.0818384	0.0868665	0.374573	0.031
PTPc	2	0.256462	-0.116501	0.0471333	0.397509	0.02
axonogenesis	4	0.132593	-0.0747696	0.11181	0.412435	0.428
synaptosome	2	-0.0463218	-0.0739216	0.0522423	0.404741	0.983
negative regulation of metabolic process	6	0.21413	-0.0426589	0.144395	0.40435	0.191
anti-apoptosis	2	-0.0381695	-0.0759199	0.0541787	0.379537	0.962
heart contraction	3	0.0488188	-0.0792886	0.0922402	0.35096	0.707
heart process	3	0.0488188	-0.0912582	0.0870404	0.362841	0.7
GTP-binding	5	0.19463	-0.0813693	0.130547	0.40827	0.221
alkali metal ion binding	4	0.264921	-0.0846838	0.114524	0.35984	0.041
topological domain:Extracellular	18	0.0650665	0.0411844	0.226878	0.399872	0.994
positive regulation of cellular process	11	0.153789	-0.00514288	0.194245	0.449446	0.702
chemical homeostasis	5	0.0540582	-0.0546213	0.128676	0.391479	0.842
microtubule	3	0.172985	-0.0818384	0.0868665	0.374573	0.17
metanephros development	3	0.111337	-0.0818384	0.0868665	0.374573	0.394
single fertilization	2	0.0720816	-0.116501	0.0471333	0.397509	0.388
endocrine system development	3	-0.00767574	-0.0820644	0.0897752	0.386673	0.933
inner ear morphogenesis	3	0.124992	-0.0792886	0.0922402	0.35096	0.334
chloride ion binding	3	0.0361995	-0.0912582	0.0870404	0.362841	0.764
anion binding	3	0.0361995	-0.126464	0.091589	0.421351	0.749
topological domain:Cytoplasmic	22	0.242158	0.0307903	0.244629	0.405623	0.516
reflex	2	0.109253	-0.0739216	0.0522423	0.404741	0.244
neurotransmitter receptor activity	3	0.066175	-0.0809307	0.0908252	0.389253	0.62
neurotransmitter transport	3	0.251061	-0.0820644	0.0897752	0.386673	0.052
sensory organ development	5	0.155155	-0.0546213	0.128676	0.391479	0.378
visual perception	4	0.0991266	-0.0747696	0.11181	0.412435	0.56
neurotransmitter binding	3	0.066175	-0.126464	0.091589	0.421351	0.611
metal ion transport	7	0.270789	-0.0369427	0.159108	0.399167	0.077
neurite morphogenesis	4	0.132593	-0.0616446	0.117993	0.394287	0.417
neuron morphogenesis during differentiation	4	0.132593	-0.0499201	0.118674	0.374481	0.44
transducer	9	0.200429	-0.0294997	0.175165	0.39894	0.373
chloride channel activity	3	0.0361995	-0.0912582	0.0870404	0.362841	0.764
repressor	3	0.0819223	-0.0818384	0.0868665	0.374573	0.527
response to stimulus	22	0.163176	0.0681849	0.241744	0.410142	0.892
Zinc finger, LIM-type	2	0.0313234	-0.104524	0.0516097	0.36577	0.629
fertilization	2	0.0720816	-0.0980925	0.0509029	0.341306	0.384
nucleoside-triphosphatase activity	7	0.212828	-0.0227147	0.159325	0.380702	0.247
Immunoglobulin subtype	5	0.0676219	-0.0671499	0.128872	0.364128	0.777
cation transport	8	0.21597	-0.0285663	0.165005	0.398223	0.257
cell surface	5	0.0334551	-0.048866	0.1357	0.369836	0.889
regulation of cell differentiation	4	0.0642492	-0.0846838	0.114524	0.35984	0.741
voltage-gated potassium channel complex	2	0.21017	-0.116501	0.0471333	0.397509	0.048
cellular homeostasis	5	0.0540582	-0.0671499	0.128872	0.364128	0.831
ear morphogenesis	3	0.124992	-0.0809307	0.0908252	0.389253	0.353
Cleavage on pair of basic residues	4	-0.0161973	-0.0499201	0.118674	0.374481	0.975
transport	15	0.315283	0.00218563	0.217656	0.401549	0.067
BTB/POZ fold	3	0.241201	-0.0912582	0.0870404	0.362841	0.048
apoptosis	8	0.0484464	-0.0350876	0.16706	0.385366	0.943
transferase	14	0.190386	0.00536074	0.20773	0.410213	0.596

## Sheet: Rodent corr in
Rodent covariation correlation - Incoming
Limited to genes for which there are orthologs in the worm data
	Efferent
		Source genes	Random genes of same size
Functional annotation	Size	Correlation	Min Corr	Median Corr	Max Corr	P-value
Homeobox	13	0.10848	-0.00590091	0.15575	0.377405	0.803
DNA-binding region:Homeobox	12	0.0814296	-0.0248329	0.156782	0.390169	0.905
nervous system development	20	0.11478	0.0291921	0.188035	0.365791	0.893
protein complex	30	0.188178	0.0564504	0.214096	0.380522	0.696
multicellular organismal process	49	0.131941	0.114149	0.243254	0.392372	0.995
cell communication	47	0.220792	0.0987398	0.239572	0.384295	0.67
transcription factor complex	14	0.0860882	0.0185618	0.164975	0.387471	0.921
macromolecular complex	32	0.174311	0.0670978	0.215887	0.391929	0.791
nucleoplasm part	15	0.102946	-0.0259644	0.168967	0.37661	0.886
HOX	11	0.0997017	-0.0171887	0.15132	0.397674	0.804
system development	32	0.113327	0.0465535	0.22028	0.389299	0.988
multicellular organismal development	38	0.138012	0.0821803	0.229481	0.376106	0.982
signal transduction	43	0.234003	0.0841948	0.235086	0.373587	0.507
nucleoplasm	15	0.102946	-0.00874557	0.168014	0.374103	0.868
Homeobox	9	0.0848596	-0.0403675	0.139117	0.393546	0.807
Helix-turn-helix motif, lambda-like repressor	7	0.0905048	-0.0235783	0.121781	0.369286	0.693
sequence-specific DNA binding	14	0.109045	0.00538903	0.167089	0.377271	0.853
anatomical structure development	34	0.130069	0.0740138	0.220662	0.381266	0.978
cell surface receptor linked signal transduction	28	0.137679	0.0159861	0.209124	0.374965	0.912
Homeodomain-related	8	0.0881938	-0.0441751	0.131648	0.388058	0.766
regulation of biological process	50	0.202802	0.1203	0.244029	0.391257	0.84
Gap junction	7	0.123006	-0.0313733	0.12197	0.359333	0.496
nuclear lumen	15	0.102946	0.0148709	0.169634	0.386817	0.874
gated channel activity	11	0.177253	0.000980161	0.147617	0.393046	0.319
regulation of cellular metabolic process	34	0.191312	0.0880922	0.218979	0.387232	0.709
transcription factor activity	16	0.108785	0.00602736	0.172853	0.381426	0.883
regulation of metabolic process	35	0.207722	0.0926359	0.226928	0.38738	0.656
biological regulation	53	0.204271	0.096226	0.246755	0.388623	0.843
membrane-enclosed lumen	16	0.102027	0.0112555	0.17395	0.426516	0.9
organelle lumen	16	0.102027	-0.00849405	0.171781	0.371066	0.89
regulation of cellular process	47	0.206137	0.0956528	0.239618	0.405743	0.791
nucleotide-binding	23	0.171036	0.0550827	0.201777	0.396194	0.728
ion channel activity	12	0.203335	-0.0107615	0.152469	0.375028	0.227
organ development	26	0.0977486	0.043083	0.206477	0.390883	0.986
behavior	11	0.106074	-0.0171887	0.15132	0.397674	0.78
plasma membrane part	24	0.194017	0.0228717	0.198295	0.361979	0.535
pattern specification process	10	0.0488412	-0.0359976	0.146392	0.406788	0.946
Transcription regulation	18	0.156192	0.017536	0.185803	0.396872	0.692
transcription regulator activity	20	0.126297	0.0165158	0.191427	0.376441	0.88
substrate specific channel activity	12	0.203335	0.000757191	0.153755	0.380332	0.249
embryonic morphogenesis	8	0.0300926	-0.0288491	0.128832	0.413288	0.955
Developmental protein	15	0.141554	-0.00874557	0.168014	0.374103	0.668
generation of neurons	10	0.107164	-0.0359976	0.146392	0.406788	0.737
Transcription	18	0.156192	0.017536	0.185803	0.396872	0.692
Ionic channel	10	0.18455	-0.00907525	0.143478	0.380737	0.262
domain:Protein kinase	12	0.182013	0.000757191	0.153755	0.380332	0.341
protein serine/threonine kinase activity	13	0.170193	-0.00590091	0.15575	0.377405	0.422
regulation of nucleobase, nucleoside, nucleotide and nucleic acid metabolic process	31	0.201134	0.0667488	0.21542	0.381816	0.613
central nervous system development	8	0.0421235	-0.0241181	0.129215	0.408281	0.939
cell migration	9	0.144606	-0.031885	0.134948	0.380357	0.451
amino acid binding	3	0.0211013	-0.0647282	0.062061	0.303288	0.769
developmental process	41	0.145958	0.106708	0.231042	0.366946	0.968
protein-tyrosine kinase activity	11	0.16617	-0.0138237	0.147928	0.407186	0.383
locomotory behavior	9	0.127163	-0.0403675	0.139117	0.393546	0.579
anatomical structure morphogenesis	22	0.113809	0.0437984	0.198468	0.398889	0.937
passive transmembrane transporter activity	12	0.203335	-0.00457937	0.156011	0.367907	0.23
channel activity	12	0.203335	0.000757191	0.153755	0.380332	0.249
regulation of transcription	30	0.187531	0.0411274	0.211535	0.368743	0.667
neurogenesis	10	0.107164	-0.0359976	0.146392	0.406788	0.737
neuron migration	4	0.095606	-0.0647794	0.090126	0.370194	0.471
binding site:ATP	12	0.182013	-0.00457937	0.156011	0.367907	0.359
integral to plasma membrane	14	0.167789	0.0185618	0.164975	0.387471	0.485
cell development	20	0.133523	0.0291921	0.188035	0.365791	0.818
intrinsic to plasma membrane	14	0.167789	-0.0243077	0.165744	0.385876	0.483
heterotrimeric G-protein complex	5	0.104178	-0.049779	0.102253	0.375533	0.486
nuclear part	17	0.0929758	0.0135754	0.179342	0.385331	0.94
protein kinase activity	14	0.170918	0.0185618	0.164975	0.387471	0.463
transcription	30	0.187531	0.0638441	0.215073	0.382467	0.714
substrate-specific transmembrane transporter activity	17	0.201347	0.0170645	0.175898	0.359013	0.339
phosphate metabolic process	17	0.17411	0.012506	0.17781	0.39628	0.521
phosphorus metabolic process	17	0.17411	0.0157841	0.180104	0.40446	0.542
embryonic limb morphogenesis	4	-0.0142405	-0.108048	0.0860572	0.34963	0.976
embryonic appendage morphogenesis	4	-0.0142405	-0.0473752	0.0840923	0.326657	0.979
organ morphogenesis	12	0.108025	-0.0107615	0.152469	0.375028	0.772
cell differentiation	27	0.140669	0.0521201	0.20796	0.385909	0.91
cellular developmental process	27	0.140669	0.0721774	0.213003	0.393721	0.911
dna-binding	17	0.149354	0.0135754	0.179342	0.385331	0.695
limb morphogenesis	4	-0.0142405	-0.0473752	0.0840923	0.326657	0.979
appendage morphogenesis	4	-0.0142405	-0.0661882	0.0844256	0.376641	0.973
voltage-gated channel	6	0.220432	-0.047755	0.110781	0.420255	0.068
cell motility	9	0.144606	-0.0403675	0.139117	0.393546	0.468
localization of cell	9	0.144606	-0.0159058	0.137439	0.38569	0.456
ion transmembrane transporter activity	15	0.196487	-0.00787738	0.169683	0.386283	0.34
plasma membrane	26	0.202805	0.0585247	0.204247	0.389681	0.509
limb development	4	-0.0142405	-0.089438	0.0849577	0.406793	0.976
appendage development	4	-0.0142405	-0.0503618	0.0885132	0.396406	0.98
kinase	14	0.161395	0.00338799	0.16662	0.420601	0.53
regulation of gene expression	30	0.187531	0.0488541	0.215984	0.381907	0.707
Serine/threonine-protein kinase	10	0.107026	-0.0219588	0.143262	0.392636	0.709
transmembrane transporter activity	18	0.19346	0.0355767	0.184301	0.396389	0.431
protein amino acid phosphorylation	14	0.168612	-0.0103468	0.162847	0.377144	0.469
Long-term depression	6	0.0864533	-0.04836	0.11562	0.367779	0.675
Serine/threonine protein kinase, active site	8	0.0848448	-0.0241181	0.129215	0.408281	0.754
adult locomotory behavior	4	0.0672792	-0.108048	0.0860572	0.34963	0.616
potassium channel activity	6	0.201196	-0.0532399	0.111087	0.364936	0.109
amine binding	3	0.0211013	-0.0914667	0.0656424	0.414314	0.812
dopamine receptor signaling pathway	3	0.0596854	-0.060356	0.0666277	0.307426	0.541
Ion transport	5	0.206473	-0.049779	0.102253	0.375533	0.084
ion transport	11	0.16486	-0.0081699	0.150378	0.367893	0.41
purine ribonucleotide binding	24	0.174616	0.060197	0.19829	0.387682	0.693
ribonucleotide binding	24	0.174616	0.0686597	0.201358	0.392836	0.701
regulation of transcription, DNA-dependent	26	0.142372	0.0176049	0.20532	0.376339	0.873
extrinsic to plasma membrane	5	0.104178	-0.0449635	0.102709	0.374003	0.49
cation channel activity	8	0.219455	-0.0241181	0.129215	0.408281	0.106
nucleotide phosphate-binding region:ATP	14	0.18864	0.00538903	0.167089	0.377271	0.373
phosphotransferase activity, alcohol group as acceptor	14	0.170918	0.0185618	0.164975	0.387471	0.463
atp-binding	17	0.156212	0.0170645	0.175898	0.359013	0.638
active site:Proton acceptor	12	0.192287	-0.0248329	0.156782	0.390169	0.283
system process	17	0.0799814	0.0157841	0.180104	0.40446	0.966
transcription, DNA-dependent	26	0.142372	0.0559872	0.208256	0.380799	0.897
Immunoglobulin subtype 2	7	0.106609	-0.0278119	0.117799	0.351838	0.567
RNA biosynthetic process	26	0.142372	0.0717429	0.205899	0.382896	0.888
Protein kinase, core	9	0.0847164	-0.0302151	0.133983	0.416645	0.782
protein phosphatase	5	0.115016	-0.0449635	0.102709	0.374003	0.416
regulation of membrane potential	4	-0.0035167	-0.0647794	0.090126	0.370194	0.949
brain development	6	0.0405153	-0.044508	0.112864	0.329304	0.872
purine nucleotide binding	24	0.174616	0.060197	0.19829	0.387682	0.693
negative regulation of apoptosis	5	0.0614346	-0.0371123	0.0953438	0.407512	0.704
glycoprotein	34	0.15471	0.0813126	0.223068	0.37828	0.923
regionalization	6	0.0209616	-0.0273823	0.110076	0.373912	0.95
molecular transducer activity	29	0.126724	0.0252123	0.209433	0.378773	0.952
signal transducer activity	29	0.126724	0.0595385	0.211044	0.39011	0.955
embryonic development	10	0.0512496	-0.00985321	0.147416	0.399281	0.952
negative regulation of programmed cell death	5	0.0614346	-0.0371123	0.0953438	0.407512	0.704
forebrain development	4	0.0181422	-0.0503618	0.0885132	0.396406	0.899
phosphorylation	14	0.168612	0.00338799	0.16662	0.420601	0.484
adult behavior	4	0.0672792	-0.108048	0.0860572	0.34963	0.616
heart morphogenesis	2	0.0303185	-0.114224	0.032983	0.324268	0.526
chordate embryonic development	6	0.0703286	-0.047755	0.110781	0.420255	0.721
post-translational protein modification	21	0.153036	0.0231803	0.192201	0.387934	0.762
cation transmembrane transporter activity	11	0.200307	-0.0171887	0.15132	0.397674	0.24
voltage-gated ion channel activity	6	0.220432	-0.044508	0.112864	0.329304	0.067
voltage-gated channel activity	6	0.220432	-0.0532399	0.111087	0.364936	0.073
metal ion transmembrane transporter activity	8	0.219455	-0.029684	0.125798	0.39661	0.107
extrinsic to membrane	5	0.104178	-0.0371123	0.0953438	0.407512	0.456
embryonic development ending in birth or egg hatching	6	0.0703286	-0.04836	0.11562	0.367779	0.757
biopolymer metabolic process	46	0.174718	0.111662	0.242014	0.394703	0.936
synaptic transmission	6	0.0524641	-0.044508	0.112864	0.329304	0.812
muscle fiber development	4	0.0568004	-0.0473752	0.0840923	0.326657	0.644
skeletal muscle fiber development	4	0.0568004	-0.089438	0.0849577	0.406793	0.679
substrate-specific transporter activity	17	0.201347	0.012506	0.17781	0.39628	0.347
basolateral plasma membrane	4	-0.0304036	-0.0647794	0.090126	0.370194	0.996
kinase activity	15	0.162698	-0.00787738	0.169683	0.386283	0.553
Palmitate	7	0.0322315	-0.0278119	0.117799	0.351838	0.934
Cytoskeleton	2	-0.025746	-0.097291	0.0308344	0.469515	0.934
G protein alpha subunit, helical insertion	3	0.0554001	-0.0914667	0.0656424	0.414314	0.564
nucleotide binding	25	0.180883	0.0415682	0.205093	0.397728	0.654
neurotransmitter metabolic process	2	0.074324	-0.100306	0.0383518	0.423992	0.29
phosphoric monoester hydrolase	3	0.173112	-0.104601	0.06771	0.306876	0.084
neuron differentiation	8	0.102193	-0.0392315	0.127604	0.335841	0.645
dorsal/ventral pattern formation	4	-0.0227739	-0.089438	0.0849577	0.406793	0.984
cell-cell signaling	7	0.057455	-0.0352294	0.124306	0.354764	0.855
IGc2	7	0.106609	-0.0235783	0.121781	0.369286	0.59
binding	89	0.244711	0.166589	0.268767	0.392128	0.76
transferase activity, transferring phosphorus-containing groups	16	0.156669	0.0112555	0.17395	0.426516	0.611
muscle development	5	0.0606957	-0.0529043	0.0983754	0.415722	0.728
Guanine nucleotide binding protein (G-protein), alpha subunit	3	0.0554001	-0.0914667	0.0656424	0.414314	0.564
ligand-gated channel activity	5	0.0443973	-0.0371123	0.0953438	0.407512	0.816
ligand-gated ion channel activity	5	0.0443973	-0.0449635	0.102709	0.374003	0.83
Protein kinase, C-terminal	4	0.0763049	-0.0647794	0.090126	0.370194	0.59
PIRSF002400:GTP-binding regulatory protein Gs alpha chain	3	0.0554001	-0.104601	0.06771	0.306876	0.58
microtubule-based process	5	0.114575	-0.0371123	0.0953438	0.407512	0.408
serotonin receptor activity	2	0.0741071	-0.107421	0.0336708	0.328736	0.28
positive regulation of metabolic process	8	0.131426	-0.0241181	0.129215	0.408281	0.48
transmission of nerve impulse	6	0.0524641	-0.044508	0.112864	0.329304	0.812
regulation of postsynaptic membrane potential	2	0.0180371	-0.114224	0.032983	0.324268	0.619
GTPase activity	5	0.17648	-0.0529043	0.0983754	0.415722	0.15
Neuroactive ligand-receptor interaction	7	0.0716143	-0.0280739	0.119675	0.413325	0.758
intracellular organelle part	25	0.139383	0.0415682	0.205093	0.397728	0.896
amine receptor activity	3	0.0511603	-0.0537727	0.0692722	0.371196	0.602
Potassium channel	3	0.168629	-0.0914667	0.0656424	0.414314	0.086
domain:AGC-kinase C-terminal	4	0.0763049	-0.0503618	0.0885132	0.396406	0.558
organelle part	25	0.139383	0.0306088	0.201997	0.364634	0.877
Immunoglobulin I-set	5	0.0399723	-0.0449635	0.102709	0.374003	0.849
ATP	5	0.139747	-0.049779	0.102253	0.375533	0.313
DNA binding	5	0.0898077	-0.0864321	0.0981501	0.333836	0.547
phosphoprotein phosphatase activity	5	0.115016	-0.0651363	0.0986664	0.356625	0.409
DNA binding	21	0.146103	0.0565082	0.193413	0.395501	0.806
S_TKc	8	0.136256	-0.0288491	0.128832	0.413288	0.453
tube morphogenesis	5	0.00326356	-0.0449635	0.102709	0.374003	0.969
plasma membrane fusion	2	0.00360306	-0.0896019	0.0365073	0.433245	0.757
Potassium channel, voltage dependent, Kv	2	0.1409	-0.107421	0.0336708	0.328736	0.088
regulation of neurotransmitter levels	3	0.0552831	-0.0537727	0.0692722	0.371196	0.587
adenyl ribonucleotide binding	18	0.162145	0.020175	0.181153	0.36048	0.631
positive regulation of nucleobase, nucleoside, nucleotide and nucleic acid metabolic process	6	0.138975	-0.04836	0.11562	0.367779	0.341
tyrosine-protein kinase	4	0.170021	-0.0647794	0.090126	0.370194	0.137
microtubule cytoskeleton	6	0.119683	-0.044508	0.112864	0.329304	0.46
potassium ion transport	5	0.161103	-0.0449635	0.102709	0.374003	0.196
S_TK_X	4	0.0763049	-0.0647794	0.090126	0.370194	0.59
skeletal muscle development	4	0.0568004	-0.108048	0.0860572	0.34963	0.68
Tyrosine protein kinase	4	0.0744236	-0.0473752	0.0840923	0.326657	0.563
protein binding	56	0.215421	0.136448	0.246813	0.374347	0.769
protein modification process	21	0.153036	0.0381179	0.196463	0.397716	0.787
tyrosine-specific phosphatase	2	0.230678	-0.083284	0.0367632	0.318096	0.007
Cyclic nucleotide-binding	3	0.0583458	-0.0647282	0.062061	0.303288	0.526
positive regulation of cellular metabolic process	7	0.136187	-0.0235115	0.119085	0.381003	0.39
cell projection organization and biogenesis	7	0.0801829	-0.0280739	0.119675	0.413325	0.712
cell projection morphogenesis	7	0.0801829	-0.0352294	0.124306	0.354764	0.758
cell part morphogenesis	7	0.0801829	-0.0235783	0.121781	0.369286	0.756
short sequence motif:Octapeptide motif	2	0.0211088	-0.083284	0.0367632	0.318096	0.618
immunoglobulin domain	8	0.0948926	-0.0392315	0.127604	0.335841	0.689
sensory perception of light stimulus	5	0.059305	-0.0371123	0.0953438	0.407512	0.719
circulatory system process	5	0.0517604	-0.0449635	0.102709	0.374003	0.794
blood circulation	5	0.0517604	-0.049779	0.102253	0.375533	0.783
nucleobase, nucleoside, nucleotide and nucleic acid metabolic process	34	0.190814	0.0534242	0.223185	0.400564	0.739
neurological system process	12	0.0751371	0.000757191	0.153755	0.380332	0.916
enzyme linked receptor protein signaling pathway	6	0.0572378	-0.0386791	0.108918	0.380375	0.807
phosphotransferase	4	0.113169	-0.089438	0.0849577	0.406793	0.352
multicellular organismal response to stress	2	0.00378907	-0.107421	0.0336708	0.328736	0.767
neuron development	6	0.0701804	-0.0273823	0.110076	0.373912	0.752
glycosylation site:N-linked (GlcNAc...)	28	0.149584	0.0159861	0.209124	0.374965	0.873
Serine/threonine protein kinase	5	0.0820561	-0.0449635	0.102709	0.374003	0.636
domain:RGS	3	0.0701476	-0.0914667	0.0656424	0.414314	0.473
heart development	4	0.0351475	-0.0647794	0.090126	0.370194	0.805
gene expression	31	0.179842	0.0540027	0.217737	0.388181	0.762
intracellular signaling cascade	17	0.241203	0.0258154	0.179415	0.415863	0.156
cellular chemical homeostasis	5	0.00239796	-0.0529043	0.0983754	0.415722	0.957
cellular ion homeostasis	5	0.00239796	-0.0371123	0.0953438	0.407512	0.957
adenyl nucleotide binding	18	0.162145	0.010551	0.180851	0.393223	0.64
voltage-gated cation channel activity	4	0.192773	-0.0647794	0.090126	0.370194	0.089
negative regulation of biological process	14	0.180453	-0.0103468	0.162847	0.377144	0.398
ATP binding	17	0.156212	0.012506	0.17781	0.39628	0.637
in utero embryonic development	3	0.0214333	-0.0914667	0.0656424	0.414314	0.809
monovalent inorganic cation transport	7	0.153992	-0.0352294	0.124306	0.354764	0.316
regulation of apoptosis	7	0.110526	-0.0235783	0.121781	0.369286	0.563
biopolymer modification	21	0.153036	0.0324658	0.192644	0.379169	0.765
Calcium signaling pathway	6	0.0953135	-0.0532399	0.111087	0.364936	0.587
RNA metabolic process	26	0.142372	0.0717429	0.205899	0.382896	0.888
focal adhesion	3	-0.0248042	-0.0914667	0.0656424	0.414314	0.979
somatotropin secreting cell differentiation	2	0.00322362	-0.107421	0.0336708	0.328736	0.77
receptor	18	0.096501	0.0252412	0.183105	0.405446	0.937
gland development	3	0.0354807	-0.0914667	0.0656424	0.414314	0.696
learning and/or memory	3	0.020948	-0.060356	0.0666277	0.307426	0.786
Regulator of G protein signalling	3	0.0701476	-0.0537727	0.0692722	0.371196	0.495
regulation of programmed cell death	7	0.110526	-0.0313733	0.12197	0.359333	0.578
negative regulation of cellular process	13	0.16377	-0.00446921	0.158257	0.38038	0.47
LIM	3	0.00128741	-0.079021	0.0658126	0.389511	0.892
guanyl ribonucleotide binding	7	0.139384	-0.0280739	0.119675	0.413325	0.386
Voltage-dependent potassium channel	2	0.1409	-0.107421	0.0336708	0.328736	0.088
membrane fusion	2	0.00360306	-0.083284	0.0367632	0.318096	0.766
guanyl nucleotide binding	7	0.139384	-0.0278119	0.117799	0.351838	0.391
microtubule cytoskeleton organization and biogenesis	3	0.128098	-0.0914667	0.0656424	0.414314	0.191
kidney development	4	0.0139798	-0.0503618	0.0885132	0.396406	0.914
Heme NO binding associated	2	0.0346401	-0.100306	0.0383518	0.423992	0.52
transporter activity	18	0.19346	0.020175	0.181153	0.36048	0.412
neurotransmitter transport	3	0.0319042	-0.060356	0.0666277	0.307426	0.734
cell-substrate adherens junction	3	-0.0248042	-0.0914667	0.0656424	0.414314	0.979
cNMP	3	0.0583458	-0.060356	0.0666277	0.307426	0.551
topological domain:Lumenal, vesicle	2	0.00461965	-0.083284	0.0367632	0.318096	0.756
ion homeostasis	5	0.00239796	-0.0651363	0.0986664	0.356625	0.971
lipoprotein	10	0.120373	-0.013129	0.139057	0.41359	0.612
urogenital system development	4	0.0139798	-0.0503618	0.0885132	0.396406	0.914
potassium transport	3	0.168629	-0.0537727	0.0692722	0.371196	0.107
tube development	5	0.00326356	-0.0864321	0.0981501	0.333836	0.959
positive regulation of transcription	5	0.116919	-0.0651363	0.0986664	0.356625	0.397
striated muscle development	4	0.0568004	-0.0661882	0.0844256	0.376641	0.672
cgmp-binding	2	0.0323996	-0.0896019	0.0365073	0.433245	0.525
Protein-tyrosine phosphatase, receptor/non-receptor type	2	0.230678	-0.107421	0.0336708	0.328736	0.02
Tyrosine protein kinase, active site	3	0.102926	-0.0914667	0.0656424	0.414314	0.305
cell-matrix junction	3	-0.0248042	-0.060356	0.0666277	0.307426	0.983
domain:Ig-like C2-type 5	3	0.0255534	-0.0537727	0.0692722	0.371196	0.769
ion transport	12	0.158378	-0.0107615	0.152469	0.375028	0.471
glycine binding	2	-0.00633824	-0.107421	0.0336708	0.328736	0.84
axon guidance	3	0.0381327	-0.104601	0.06771	0.306876	0.685
ureteric bud development	3	0.0246344	-0.0647282	0.062061	0.303288	0.745
neurotransmitter receptor	2	0.0741071	-0.097291	0.0308344	0.469515	0.256
negative regulation of transcription	5	0.0990337	-0.0371123	0.0953438	0.407512	0.479
localization	30	0.175521	0.0564504	0.214096	0.380522	0.781
TyrKc	4	0.0744236	-0.0647794	0.090126	0.370194	0.598
righting reflex	2	0.0218836	-0.0896019	0.0365073	0.433245	0.598
potassium	3	0.168629	-0.060356	0.0666277	0.307426	0.11
RGS	3	0.0701476	-0.0537727	0.0692722	0.371196	0.495
neurite development	5	0.0676576	-0.0864321	0.0981501	0.333836	0.685
transmembrane receptor protein serine/threonine kinase signaling pathway	3	0.041325	-0.0647282	0.062061	0.303288	0.623
neurogenesis	4	0.147592	-0.0661882	0.0844256	0.376641	0.201
voltage-gated potassium channel activity	3	0.168629	-0.0914667	0.0656424	0.414314	0.086
protein tyrosine phosphatase activity	3	0.150757	-0.060356	0.0666277	0.307426	0.155
Potassium channel, voltage dependent, Kv, tetramerisation	2	0.1409	-0.100306	0.0383518	0.423992	0.101
Fibronectin, type III-like fold	5	0.0981254	-0.0864321	0.0981501	0.333836	0.5
Fibronectin, type III	5	0.0981254	-0.0651363	0.0986664	0.356625	0.505
domain:Ig-like C2-type 2	4	0.0180656	-0.089438	0.0849577	0.406793	0.884
domain:Ig-like C2-type 1	4	0.0180656	-0.0503618	0.0885132	0.396406	0.899
cyclic nucleotide metabolic process	3	0.0516883	-0.0537727	0.0692722	0.371196	0.6
Immunoglobulin-like	7	0.0930405	-0.0313733	0.12197	0.359333	0.669
G-protein coupled receptor protein signaling pathway	14	0.152723	0.0185618	0.164975	0.387471	0.568
positive regulation of transcription, DNA-dependent	4	0.0251634	-0.0661882	0.0844256	0.376641	0.856
cell morphogenesis	9	0.0589999	-0.0302151	0.133983	0.416645	0.898
cellular structure morphogenesis	9	0.0589999	-0.0403675	0.139117	0.393546	0.911
positive regulation of biological process	12	0.111437	-0.0102587	0.157865	0.404711	0.773
chloride channel	3	0.0143948	-0.104601	0.06771	0.306876	0.827
domain:Ig-like C2-type 4	3	0.0255534	-0.0647282	0.062061	0.303288	0.735
domain:LIM zinc-binding 2	2	0.00355762	-0.0896019	0.0365073	0.433245	0.757
domain:LIM zinc-binding 1	2	0.00355762	-0.107421	0.0336708	0.328736	0.77
regulation of heart contraction	3	0.0182323	-0.0537727	0.0692722	0.371196	0.809
response to organic substance	2	0.0180371	-0.083284	0.0367632	0.318096	0.628
differentiation	7	0.116477	-0.0278119	0.117799	0.351838	0.505
GPCR, family 3, metabotropic glutamate receptor	2	-0.0103562	-0.097291	0.0308344	0.469515	0.871
adenohypophysis development	2	0.00322362	-0.0896019	0.0365073	0.433245	0.761
receptor activity	21	0.106701	0.0324658	0.192644	0.379169	0.949
glutamate receptor activity	3	0.00467266	-0.0647282	0.062061	0.303288	0.867
tyrosine-specific protein kinase	2	0.0441765	-0.0896019	0.0365073	0.433245	0.448
cell	92	0.243423	0.157605	0.269924	0.383347	0.785
cell part	92	0.243423	0.137884	0.273134	0.406615	0.795
negative regulation of nucleobase, nucleoside, nucleotide and nucleic acid metabolic process	5	0.0990337	-0.0864321	0.0981501	0.333836	0.497
myoblast differentiation	2	0.0200027	-0.114224	0.032983	0.324268	0.607
phosphoric monoester hydrolase activity	5	0.115016	-0.0529043	0.0983754	0.415722	0.394
cGMP binding	2	0.0323996	-0.0896019	0.0365073	0.433245	0.525
GMP binding	2	0.0323996	-0.107421	0.0336708	0.328736	0.51
negative regulation of signal transduction	4	0.0671757	-0.108048	0.0860572	0.34963	0.617
regulation of multicellular organismal process	6	0.0692822	-0.04836	0.11562	0.367779	0.762
Immunoglobulin-like fold	7	0.106609	-0.0235783	0.121781	0.369286	0.59
chloride	3	0.0143948	-0.104601	0.06771	0.306876	0.827
potassium ion binding	3	0.168629	-0.0647282	0.062061	0.303288	0.111
PTPc	2	0.230678	-0.097291	0.0308344	0.469515	0.016
axonogenesis	4	0.0930326	-0.089438	0.0849577	0.406793	0.451
synaptosome	2	-0.0226573	-0.107421	0.0336708	0.328736	0.94
negative regulation of metabolic process	6	0.213128	-0.0273823	0.110076	0.373912	0.085
anti-apoptosis	2	-0.0295068	-0.0896019	0.0365073	0.433245	0.949
heart contraction	3	0.0182323	-0.060356	0.0666277	0.307426	0.811
heart process	3	0.0182323	-0.0537727	0.0692722	0.371196	0.809
GTP-binding	5	0.131764	-0.0864321	0.0981501	0.333836	0.318
alkali metal ion binding	4	0.169786	-0.0473752	0.0840923	0.326657	0.143
topological domain:Extracellular	18	0.0900284	0.0355767	0.184301	0.396389	0.968
positive regulation of cellular process	11	0.111403	-0.0138237	0.147928	0.407186	0.717
chemical homeostasis	5	0.00239796	-0.0449635	0.102709	0.374003	0.971
microtubule	3	0.164301	-0.0537727	0.0692722	0.371196	0.116
metanephros development	3	0.0246344	-0.104601	0.06771	0.306876	0.776
single fertilization	2	0.00137279	-0.114224	0.032983	0.324268	0.767
endocrine system development	3	0.0354807	-0.0914667	0.0656424	0.414314	0.696
inner ear morphogenesis	3	0.0702236	-0.060356	0.0666277	0.307426	0.476
chloride ion binding	3	0.0143948	-0.0537727	0.0692722	0.371196	0.825
anion binding	3	0.0143948	-0.104601	0.06771	0.306876	0.827
topological domain:Cytoplasmic	22	0.155633	0.0550948	0.194395	0.399143	0.787
reflex	2	0.0218836	-0.083284	0.0367632	0.318096	0.612
neurotransmitter receptor activity	3	0.00741699	-0.0647282	0.062061	0.303288	0.849
neurotransmitter transport	3	0.0319042	-0.0914667	0.0656424	0.414314	0.728
sensory organ development	5	0.0942548	-0.0449635	0.102709	0.374003	0.573
visual perception	4	0.0487904	-0.0647794	0.090126	0.370194	0.738
neurotransmitter binding	3	0.00741699	-0.104601	0.06771	0.306876	0.867
metal ion transport	7	0.178446	-0.0278119	0.117799	0.351838	0.205
neurite morphogenesis	4	0.0930326	-0.0661882	0.0844256	0.376641	0.452
neuron morphogenesis during differentiation	4	0.0930326	-0.089438	0.0849577	0.406793	0.451
transducer	9	0.176467	-0.0403675	0.139117	0.393546	0.284
chloride channel activity	3	0.0143948	-0.0537727	0.0692722	0.371196	0.825
repressor	3	0.0479023	-0.104601	0.06771	0.306876	0.626
response to stimulus	22	0.0907483	0.0550948	0.194395	0.399143	0.977
Zinc finger, LIM-type	2	0.00355762	-0.107421	0.0336708	0.328736	0.77
fertilization	2	0.00137279	-0.100306	0.0383518	0.423992	0.781
nucleoside-triphosphatase activity	7	0.12636	-0.0313733	0.12197	0.359333	0.48
Immunoglobulin subtype	5	0.048602	-0.0651363	0.0986664	0.356625	0.779
cation transport	8	0.170373	-0.029684	0.125798	0.39661	0.266
cell surface	5	0.0564263	-0.0371123	0.0953438	0.407512	0.738
regulation of cell differentiation	4	0.0829082	-0.0503618	0.0885132	0.396406	0.523
voltage-gated potassium channel complex	2	0.1409	-0.100306	0.0383518	0.423992	0.101
cellular homeostasis	5	0.00239796	-0.0864321	0.0981501	0.333836	0.961
ear morphogenesis	3	0.0702236	-0.0647282	0.062061	0.303288	0.451
Cleavage on pair of basic residues	4	-0.00471408	-0.089438	0.0849577	0.406793	0.955
transport	15	0.170533	-0.0259644	0.168967	0.37661	0.49
BTB/POZ fold	3	0.156754	-0.0537727	0.0692722	0.371196	0.137
apoptosis	8	0.0866996	-0.023267	0.128432	0.37611	0.737
transferase	14	0.164896	0.0185618	0.164975	0.387471	0.501
